# Supplementary material for: Cu(ii)–tBu–PHOX catalyzed enantioselective malonate addition onto 3-hydroxy 2-oxindoles: application in the synthesis of dimeric pyrroloindoline alkaloids
Source: Royal Society of Chemistry journal article supplement (doi:10.1039/c8cc04338h), 2018-01-01
Supplement: c8cc04338h1.pdf [file c8cc04338h1.pdf]

Supplemental material for:

**Cu(II)-PHOX Catalyzed Enantioselective Malonate  
Addition onto 3-Hydroxy 2-Oxindoles: Application in the  
Synthesis of Dimeric Pyrroloindoline Alkaloids\***

K. Naresh Babu,<sup>a</sup> Lakshmana K. Kinthada,<sup>a</sup> Partha Pratim Das,<sup>b</sup> and Alakesh Bisai\*<sup>a</sup>

<sup>a</sup>*Department of Chemistry, Indian Institute of Science Education and Research Bhopal, Bhauri,  
Bhopal, MP - 462 066, India.* <sup>b</sup>*Department of Chemistry, Indian Institute of Technology Kanpur,  
UP – 208 016, India*

**Table of Contents**

|                                                                                     |             |
|-------------------------------------------------------------------------------------|-------------|
| Materials and methods                                                               | S2          |
| Synthesis of compound <b>14</b>                                                     | S3          |
| Synthesis of compounds <b>15a-b</b>                                                 | S4 – S5     |
| Synthesis and characterization of <b>13b</b>                                        | S5          |
| General synthetic procedure of compounds (±)- <b>5a-e</b>                           | S6 – S8     |
| General synthetic procedure of compounds (±)- <b>5f-g</b>                           | S8 – S9     |
| General synthetic procedure of compounds (±)- <b>5h-j</b>                           | S9 – S10    |
| Synthesis and characterization of <b>5k</b>                                         | S11 – S12   |
| Synthesis and characterization of <b>5l</b>                                         | S12 – S13   |
| General synthetic procedure of compounds (±)- <b>4a-t</b>                           | S13         |
| Exhaustive optimization of enantioselective malonate addition                       | S13 – S15   |
| General synthetic procedure of compounds ( <i>R</i> )- <b>4a-s</b> , (+)- <b>4t</b> | S15 – S29   |
| Synthesis and characterization of ( <i>R</i> )- <b>8</b>                            | S29 – S30   |
| Synthesis and characterization of ( <i>R</i> )- <b>9</b>                            | S30 – S31   |
| Synthesis and characterization of <b>10</b>                                         | S31 – S32   |
| Synthesis and characterization of <b>11</b>                                         | S32 – S33   |
| Synthetic procedure and characterization of compound ( <i>S,S</i> )- <b>12</b>      | S33 – S34   |
| Synthesis of compound (±)- <b>17</b>                                                | S34 – S36   |
| Synthesis of compound (±)- <b>19</b>                                                | S36 – S37   |
| References and notes                                                                | S37         |
| Spectral graphics                                                                   | S38 – S143  |
| Crude NMR of compound <b>10</b> , (±)- <b>17</b> and (±)- <b>18</b>                 | S144 – S146 |
| HPLC data                                                                           | S147 – S198 |
| EPR study of Cu-PHOX complex                                                        | S199 – S201 |
| <sup>1</sup> H and <sup>31</sup> P NMR study                                        | S201 – S206 |
| Cyclic voltagram study                                                              | S206 – S207 |
| X-ray structure of Cu-PHOX complex                                                  | S207 – S211 |

## Materials and Methods

Unless otherwise stated, reactions were performed in oven-dried glassware fitted with rubber septa under an inert atmosphere and were stirred with Teflon-coated magnetic stirring bars. Liquid reagents and solvents were transferred *via* syringe using standard Schlenk techniques. Tetrahydrofuran (THF) and diethyl ether (Et<sub>2</sub>O) were distilled over sodium/benzophenone ketyl. Dichloromethane (CH<sub>2</sub>Cl<sub>2</sub>), toluene, and benzene were distilled over calcium hydride. All other solvents and reagents were used as received unless otherwise noted. Reaction temperatures above 23 °C refer to oil bath temperature. Thin layer chromatography was performed using silica gel 60 F-254 precoated plates (0.25 mm) and visualized by UV irradiation, anisaldehyde stain and other stains. Silica gel of particle size 100-200 mesh was used for flash chromatography. Melting points were recorded on a digital melting point apparatus and are uncorrected. <sup>1</sup>H and <sup>13</sup>C NMR spectra were recorded 400, 500 MHz spectrometers with <sup>13</sup>C operating frequencies of 100, 125 MHz respectively. Chemical shifts (δ) are reported in ppm relative to the residual solvent (CDCl<sub>3</sub>) signal (δ = 7.26 for <sup>1</sup>H NMR and δ = 77.0 for <sup>13</sup>C NMR). Data for <sup>1</sup>H NMR spectra are reported as follows: chemical shift (multiplicity, coupling constants, and number of hydrogen). Abbreviations are as follows: s (singlet), d (doublet), t (triplet), q (quartet), m (multiplet), br (broad). IR spectra were recorded on a FT-IR system (Spectrum BX) and are reported in frequency of absorption (cm<sup>-1</sup>). Only selected IR absorbencies are reported. High-Resolution Mass Spectrometry (HRMS) and Low-Resolution Mass Spectrometry (LRMS) data were recorded on MicrOTOF-Q-II mass spectrometer using methanol as solvent. Optical rotations were measured on an Autopol I automatic polarimeter. Enantiomeric excess was determined by chiral HPLC analysis performed on HPLC system with Daicel Chiralpak AD-H, Chiralpak OD-3, Chiralpak OZ-3 and Chiralpak IB, Chiralpak ID-3, columns.

Compounds **13b-c**, **14** and **15a-b** were synthesized as per literature known protocol.<sup>1</sup>

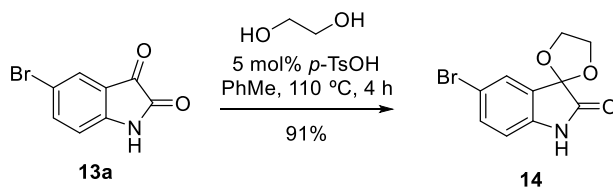

**Synthetic preparation of compound 14:** To the solution of 5-bromoisatin (750 mg, 3.3 mmol, 1.0 equiv) in toluene (30 mL) under nitrogen atmosphere at 25 °C was added ethylene glycol (3.6 mL, 62.4 mmol, 19.0 equiv) and *p*-toluenesulphonic acid (28.5 mg, 0.2 mmol, 0.05 equiv). Then the reaction mixture was placed over a pre heated oil bath maintaining temperature 110 °C and stirring was continued for 4 h. Upon completion of starting material (judged by TLC analysis under UV light and I<sub>2</sub> stain), reaction mixture was cooled down to room temperature to dryness and residue was diluted with dichloromethane (10 mL) and washed with saturated sodium bicarbonate solution (5 mL). Then the organic compound was extracted with dichloromethane (10 mL X 3). The combined organic layers were dried over anhydrous sodium sulphate and concentrated under reduced pressure. The crude product was purified through column chromatography using 30-40% (EtOAc/Hexane) as eluent to afford the desired product.

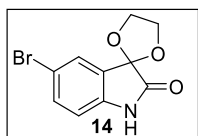

**3-(5-Bromo-1H-indol-3-yl)-3-hydroxyindolin-2-one:**<sup>1</sup> Compound **14** was obtained as colorless solid. (3.3 mmol scale of reaction, 812 mg of product, 91% yield); *R<sub>f</sub>* = 0.60 (50% EtOAc in hexane); <sup>1</sup>H NMR (400 MHz, CDCl<sub>3</sub>) δ 8.57 (s, 1H), 7.47 (m, 1H), 7.43 - 7.41 (m, 1H), 6.72 (d, *J* = 8.3 Hz, 1H), 4.56 - 4.52 (m, 2H), 4.33 - 4.30 (m, 2H).

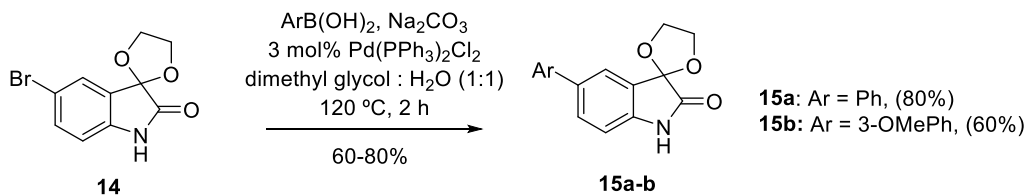

**General procedure for the synthesis of compound 15a-b:**<sup>1</sup> To a solution of **14** (1.0 equiv) in ethylene glycol dimethyl ether (4 mL) under nitrogen atmosphere at 25 °C was added dichloro bis(triphenylphosphine)palladium(II) (0.03 equiv.). After 15 minutes stirring, phenylboronic acid (1.5 equiv), sodium bicarbonate (3.0 equiv), and water (4 mL) was added simultaneously. Then the reaction mixture was placed over a pre heated oil bath maintaining temperature 120 °C and stirring was continued for 2 h. Upon completion of starting material (judged by TLC analysis under UV light and I<sub>2</sub> stain), the reaction mixture was cooled down to 25 °C and. evaporated to dryness and residue was diluted with dichloromethane (20 mL) and washed with 10% sodium hydroxide solution (15 mL). The aqueous layer was extracted with dichloromethane (10 mL X 3). The combined organic layers were dried over anhydrous sodium sulphate and concentrated under reduced pressure. The crude product was purified through column chromatography using 30-40% (EtOAc/Hexane) as eluent to afford the desired product.

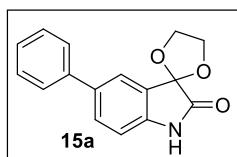

**5'-Phenylspiro[[1,3]dioxolane-2,3'-indolin]-2'-one:**<sup>1</sup> Compound **15a** was obtained as colorless solid (3.4 mmol scale of reaction, 720 mg of product, 80% yield);  $R_f$  = 0.55 (50% EtOAc in hexane); <sup>1</sup>H NMR (500 MHz, 0.5 mL CDCl<sub>3</sub>)  $\delta$  8.41 (brs, 1H), 7.59 - 7.58 (m, 1H), 7.53 - 7.50 (m, 3H), 7.42 - 7.39 (m, 2H), 7.33 - 7.30 (m, 1H), 6.88 (d,  $J$  = 8.1 Hz, 1H), 4.60 - 4.58 (m, 2H), 4.36 - 4.34 (m, 2H).

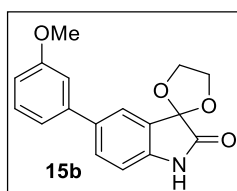

**5'-(3-Methoxyphenyl)spiro[[1,3]dioxolane-2,3'-indolin]-2'-one:**<sup>1</sup> Compound **15b** was obtained as colorless solid (3.3 mmol scale of reaction, 590 mg of product, 60% yield);  $R_f$  = 0.56 (50% EtOAc in hexane); <sup>1</sup>H NMR (400 MHz, Chloroform-*d*)  $\delta$  8.67 (brs, 1H), 7.57 (d,  $J$  = 1.8 Hz, 1H), 7.50 (dd,  $J$  = 8.1, 1.9 Hz, 1H), 7.31 (t,  $J$  = 7.9 Hz, 1H), 7.11 -



7.05 (m, 2H), 6.88 - 6.84 (m, 2H), 4.60 - 4.57 (m, 2H), 4.36 - 4.33 (m, 2H), 3.84 (s, 3H);  $^{13}\text{C}$  NMR (120 MHz,  $\text{CDCl}_3$ )  $\delta$  175.8, 159.9, 141.9, 141.3, 136.7, 136.5, 129.8, 124.9, 124.1, 119.4, 112.6, 112.5, 111.0, 102.5, 65.9, 55.3; **MP** 150 - 152 °C.

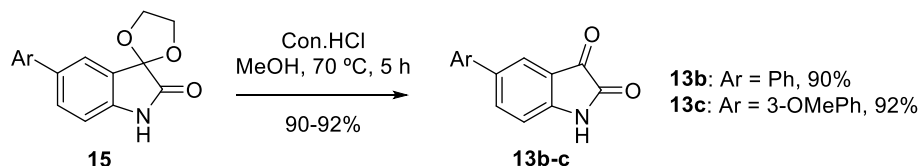

**General procedure for the synthesis of compound 13b-c:**<sup>1</sup> To the compound of **15** (1.0 equiv) in methanol (9 mL) at 25 °C was added conc. HCl (4 mL). Then the reaction mixture was placed over a pre heated oil bath maintaining temperature 70 °C for 5 h. Upon completion of starting material (judged by TLC analysis under UV light and cerium ammonium molybdate stain), the reaction mixture was evaporated to dryness. The residue was diluted with dichloromethane and washed with saturated sodium bicarbonate solution. Then the organic compound was extracted with dichloromethane (10 mL X 3). Then the combined organic layers were dried over anhydrous sodium sulphate and concentrated under reduced pressure. The crude product was purified through column chromatography using 35-45% (EtOAc/Hexane) as eluent to afford the desired product.

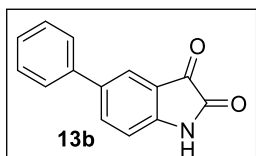

**5-Phenylindoline-2,3-dione:** Compound **13b** was obtained as colourless solid. (2.2 mmol scale of reaction; 400 mg of product; 80% yield;  $R_f$  = 0.50 (50% EtOAc in hexane);  $^1\text{H}$  NMR (400 MHz, DMSO)  $\delta$  10.38 (s, 1H), 7.77 - 7.75 (m, 1H), 7.7 (dd,  $J$  = 8.1, 2.0 Hz, 1H), 7.51 - 7.48 (m, 2H), 7.45 - 7.36 (m, 2H), 7.37 - 7.32 (m, 1H), 2.27 (DMSO).

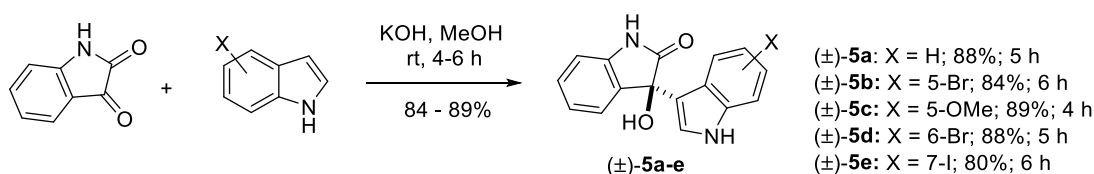

**General procedure for the synthesis of 3-Hydroxy-3-indolyl-2-oxindole ( $\pm$ )-5a-e:** In a round-bottom flask was charged with isatin (1.0 equiv) in MeOH (60 mL) under nitrogen atmosphere at 25 °C indole (1.2 equiv) and KOH (0.2 equiv) were added successively. Then the reaction mixture was then allowed to stir for 4 - 6 h. Upon completion of starting material (judged by TLC analysis under UV light and I<sub>2</sub> stain), the reaction mixture was quenched with water (60 mL) and organic compound was extracted with ethyl acetate (2 X 80 mL). The combined organic layers were dried over anhydrous sodium sulphate and concentrated under reduced pressure. The crude product was purified through column chromatography using hexane-EtOAc as eluent to afford the desired product.

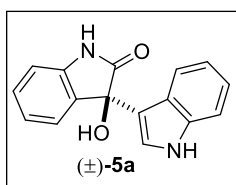

**3-Hydroxy-3-(1H-indol-3-yl)indolin-2-one:**<sup>2</sup> Compound ( $\pm$ )-5a was obtained as a colorless solid (13.6 mmol scale of reaction, 3.2 g of product, 88% yield);  $R_f$  = 0.30 (50% EtOAc in hexane); <sup>1</sup>H NMR (400 MHz, DMSO)  $\delta$  10.94 (s, 1H), 10.32 (s, 1H), 7.31 - 7.28 (m, 2H), 7.24 - 7.19 (m, 2H), 7.06 (s, 1H), 7.00 (t,  $J$  = 7.5 Hz, 1H), 6.94 - 6.88 (m, 2H), 6.83 (t,  $J$  = 7.4 Hz, 1H), 6.37 (s, 1H), 3.68 (Water); IR (film)  $\nu_{\max}$  3428, 2839, 2115, 1650, 1470, 1337, 1226, 1185, 1105, 940, 751 cm<sup>-1</sup>; MP 350-352 °C.

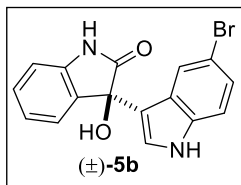

**3-(5-Bromo-1H-indol-3-yl)-3-hydroxyindolin-2-one:** Compound ( $\pm$ )-5b was obtained as a colorless solid (6.8 mmol scale of reaction, 1.95 g of product, 84% yield);  $R_f$  = 0.30 (50% EtOAc in hexane); <sup>1</sup>H NMR (500 MHz, DMSO)  $\delta$  11.22 (s, 1H), 10.41 (s, 1H), 7.75 (s, 1H), 7.36 (d,  $J$  = 8.4 Hz, 1H), 7.32 - 7.28 (m, 2H), 7.21 (d,  $J$  = 8.2 Hz, 1H), 7.05 -

7.01 (m, 2H), 6.97 (d,  $J = 7.4$  Hz, 1H), 6.55 (s, 1H);  $^{13}\text{C}$  NMR (125 MHz, DMSO)  $\delta$  178.8, 142.1, 136.0, 133.3, 129.8, 127.4, 125.6, 125.3, 124.2, 123.6, 122.4, 115.7, 114.1, 111.8, 110.3, 75.2; **IR** (film) 3420, 1792, 1644, 1469, 1245, 1170, 815, 697  $\text{cm}^{-1}$ ; **MP** 190 - 192  $^{\circ}\text{C}$ .

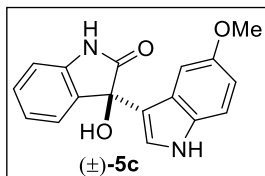

**3-Hydroxy-3-(5-methoxy-1H-indol-3-yl)indolin-2-one:** Compound (±)-**5c** was obtained as a colorless solid. (6.5 mmol scale of reaction, 1.7 g of product, 89% yield);  $R_f = 3.1$  (50% EtOAc in hexane);  $^1\text{H}$  NMR (400 MHz, 0.5 mL  $\text{CDCl}_3$ , 0.1 mL  $\text{DMSO}-d_6$ )  $\delta$  9.64 (s, 1H), 9.54 (s, 1H), 7.17 (d,  $J = 6.9$  Hz, 1H), 7.01 - 6.96 (m, 2H), 6.86 - 6.82 (m, 2H), 6.76 (t,  $J = 7.2$  Hz, 1H), 6.69 (d,  $J = 7.4$  Hz, 1H), 6.51 (d,  $J = 8.6$  Hz, 1H), 5.49 (s, 1H), 3.49 (s, 3H), 2.69 (s, 1H);  $^{13}\text{C}$  NMR (100 MHz, 0.5 mL  $\text{CDCl}_3$ , 0.1 mL  $\text{DMSO}-d_6$ )  $\delta$  179.3, 153.4, 141.4, 132.8, 132.2, 129.1, 125.4, 124.9, 124.3, 122.1, 114.8, 112.0, 111.6, 110.0, 102.5, 75.6, 55.5; **IR** (film)  $\nu_{\text{max}}$  3416, 2861, 2832, 2106, 1792, 1704, 1622, 1469, 1071, 904, 751  $\text{cm}^{-1}$ ; **MP** 194 - 196  $^{\circ}\text{C}$ .

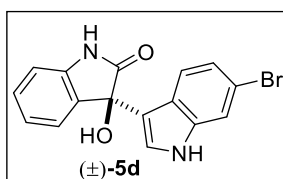

**3-(6-bromo-1H-indol-3-yl)-3-hydroxyindolin-2-one:** Compound (±)-**5d** was obtained as a colorless solid. (6.8 mmol scale of reaction, 2.05 g of product, 88% yield);  $R_f = 2.5$  (50% EtOAc in hexane);  $^1\text{H}$  NMR (400 MHz,  $\text{DMSO}-d_6$ )  $\delta$  11.14 (s, 1H), 10.38 (s, 1H), 7.57 (s, 1H), 7.44 (d,  $J = 8.6$  Hz, 1H), 7.29 - 7.25 (m, 2H), 7.08 - 7.07 (m, 2H), 7.01 - 6.98 (m, 1H), 6.94 (d,  $J = 7.2$  Hz, 1H), 6.49 (s, 1H);  $^{13}\text{C}$  NMR (100 MHz,  $\text{DMSO}-d_6$ )  $\delta$  178.8, 142.1, 138.2, 133.5, 129.7, 125.2, 125.1, 124.6, 122.8, 122.3, 122.0, 116.3, 114.6, 114.5, 110.3, 75.2, 75.2; **IR** (film)  $\nu_{\text{max}}$  3500, 2950, 2800, 2520, 1802, 1706, 1602, 1499, 1001, 984, 721  $\text{cm}^{-1}$ ; **MP** >260  $^{\circ}\text{C}$ .

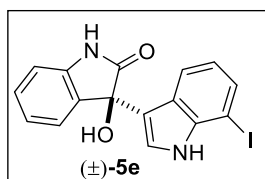

**3-hydroxy-3-(7-iodo-1H-indol-3-yl)indolin-2-one:** Compound (±)-**5e** was obtained as a colorless solid. (6.5 mmol scale of reaction, 2.02 g of product, 80% yield);  $R_f = 2.9$  (50% EtOAc in hexane);  $^1\text{H NMR}$  (400 MHz, DMSO- $\text{D}_6$ )  $\delta$  10.9 (s, 1H), 10.40 (s, 1H), 7.48 – 7.42 (m, 2H), 7.29 – 7.24 (m, 2H), 7.07 (s, 1H), 7.99 – 6.93 (m, 2H), 6.74 (s, 1H), 6.47 (s, 1H);  $^{13}\text{C NMR}$  (100 MHz, DMSO- $\text{D}_6$ )  $\delta$  178.6, 142.1, 138.9, 133.5, 130.6, 129.7, 125.9, 125.2, 124.8, 122.3, 121.0, 117.4, 110.2, 77.4, 75.5; **IR** (film)  $\nu_{\text{max}}$  3560, 2960, 2852, 2116, 1709, 1662, 1409, 1001, 924, 701  $\text{cm}^{-1}$ ; **MP** >260 °C.

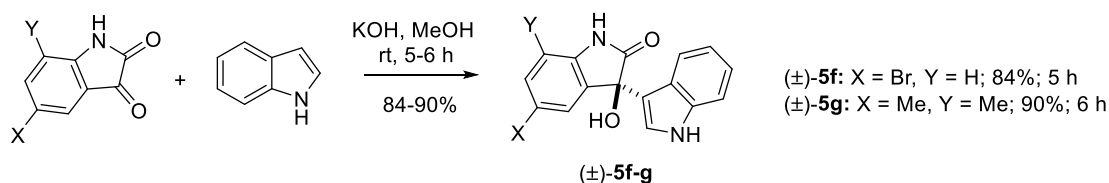

**General procedure for the synthesis of 3-Hydroxy-3-indolyl-2-oxindole (±)-5f-g:** In a round bottom flask was charged with isatin (1.0 equiv) in MeOH (60 mL) under nitrogen atmosphere at 25 °C indole (1.2 equiv) and KOH (0.2 equiv) were added successively. Then the reaction mixture was then allowed to stir for 5-6 h. Upon completion of starting material (judged by TLC analysis under UV light and  $\text{I}_2$  stain), the reaction mixture was quenched with water (60 mL) and organic compound was extracted with ethyl acetate (2 X 80 mL). The combined organic layers were dried over anhydrous sodium sulphate and concentrated under reduced pressure. The crude product was purified through column chromatography using hexane-EtOAc as eluent to afford the desired product.

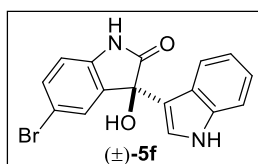

**5-Bromo-3-hydroxy-3-(1*H*-indol-3-yl)indolin-2-one:** Compound (±)-**5f** was obtained as a colorless solid. (3.3 mmol scale of reaction, 1.0 g of product, 84% yield);  $R_f = 3.2$  (50% EtOAc in hexane);  $^1\text{H NMR}$  (500 MHz, DMSO)  $\delta$  11.06 (s, 1H), 10.58 (s, 1H), 7.46 (d,  $J = 7.3$  Hz, 1H), 7.38 (m, 3H), 7.19 (s, 1H), 7.08 (d,  $J = 12.6$  Hz, 1H), 6.95 - 6.93 (m, 2H), 6.66 (s, 1H), (Water);  $^{13}\text{C NMR}$  (125 MHz, DMSO)  $\delta$  178.5, 141.4, 137.3, 136.3, 132.3, 127.9, 125.1, 124.1, 121.8, 120.4, 119.3, 115.1, 114.0, 112.4, 112.2, 75.3; **IR** (film)  $\nu_{\text{max}}$  3416, 1792, 1644, 1492, 1335, 1247, 1177, 1121, 815, 715  $\text{cm}^{-1}$ ; **MP** 310 - 312  $^{\circ}\text{C}$ .

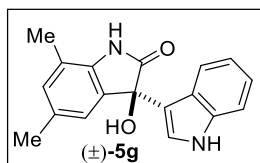

**3-Hydroxy-3-(1*H*-indol-3-yl)-5,7-dimethylindolin-2-one:** Compound (±)-**5g** was obtained as a colorless solid (3.9 mmol scale of reaction, 1.0 g of product, 90% yield);  $R_f = 0.55$  (50% EtOAc in hexane);  $^1\text{H NMR}$  (500 MHz, 0.5 mL  $\text{CDCl}_3$ , 0.1 mL  $\text{DMSO-}D_6$ )  $\delta$  10.93 (s, 1H), 10.53 (s, 1H), 7.32 (dd,  $J = 47.6, 8.2$  Hz, 2H), 7.02 (t,  $J = 7.6$  Hz, 1H), 6.86 - 6.79 (m, 3H), 3.38 (s, 3H), 2.23 (d,  $J = 67.2$  Hz, 3H);  $^{13}\text{C NMR}$  (125 MHz,  $\text{DMSO-}D_6$ )  $\delta$  179.7, 137.9, 137.4, 134.7, 130.5, 129.9, 126.2, 124.8, 123.3, 121.4, 121.3, 118.9, 118.6, 115.1, 112.0, 55.4, 21.2, 1; **IR** (film)  $\nu_{\text{max}}$  3387, 3304, 2924, 2852, 1735, 1701, 1624, 1544, 1465, 1286, 1099, 740, 617  $\text{cm}^{-1}$ ; **MP** 210 - 212  $^{\circ}\text{C}$ .

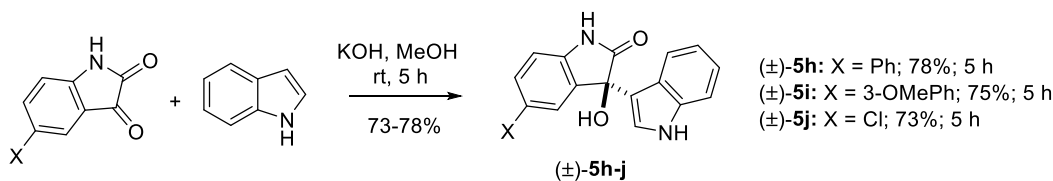

**General procedure for the synthesis of 3-Hydroxy-3-indolyl-2-oxindoles (±)-**5h-j** is like synthesis of (±)-**5f-g**.**

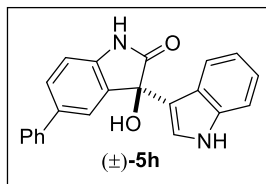

**3-Hydroxy-3-(1*H*-indol-3-yl)-5-phenylindolin-2-one:** Compound (±)-**5h** was obtained as a colorless solid (3.5 mmol scale of reaction, 930 mg of product, 78% yield);  $R_f$  = 3.2 (50% EtOAc in hexane);  $^1\text{H NMR}$  (400 MHz, DMSO- $\text{D}_6$ )  $\delta$  10.96 (s, 1H), 10.42 (s, 1H), 7.55 - 7.47 (m, 3H), 7.41 - 7.22 (m, 5H), 7.01 (s, 1H), 7.01 - 6.82 (m, 3H), 6.41 (s, 1H), 3.32 (Water);  $^{13}\text{C NMR}$  (125 MHz, DMSO- $\text{D}_6$ )  $\delta$  178.9, 141.7, 140.6, 137.2, 134.6, 134.3, 129.4 (2C), 127.9, 127.2, 126.5 (2C), 125.3, 124.1, 123.4, 121.5, 120.7, 118.9, 115.7, 111.9, 110.5, 75.5; **IR** (film)  $\nu_{\text{max}}$  3415, 3387, 2922, 2850, 2357, 1714, 1624, 1389, 1172, 744, 694  $\text{cm}^{-1}$ ; **MP** > 300 °C.

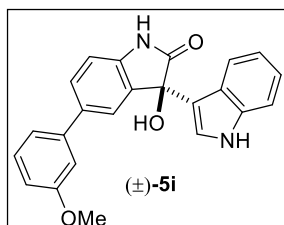

**3-Hydroxy-3-(1*H*-indol-3-yl)-5-(3-methoxyphenyl)indolin-2-one:** Compound (±)-**5i** was obtained as an orange solid (2.0 mmol scale of reaction, 555 mg of product, 75% yield);  $R_f$  = 3.3 (50% EtOAc in hexane);  $^1\text{H NMR}$  (400 MHz, DMSO- $\text{D}_6$ )  $\delta$  10.96 (s, 1H), 10.42 (s, 1H), 7.55 (d,  $J$  = 8.1 MHz, 1H), 7.49 (s, 1H), 7.42 (d,  $J$  = 8.1 MHz, 1H), 7.32 - 7.25 (m, 2H), 7.09 - 7.06 (m, 2H), 7.02 - 6.95 (m, 3H), 6.87 - 6.81 (m, 2H), 6.41 (s, 1H), 3.75 (s, 3H), 3.33 (Water);  $^{13}\text{C NMR}$  (125 MHz, DMSO- $\text{D}_6$ )  $\delta$  183.7, 164.9, 146.8, 146.6, 142.0, 139.3, 138.9, 135.1, 132.8, 130.1, 128.4, 128.2, 126.3, 125.5, 123.7, 123.6, 120.5, 117.6, 116.7, 116.6, 115.2, 80.2, 60.3; **IR** (film)  $\nu_{\text{max}}$  3388, 2926, 2355, 1712, 1641, 1624, 1579, 1477, 1392, 1165, 1082, 821, 740  $\text{cm}^{-1}$ ; **MP** > 300 °C.

Compound (±)-**5j** was prepared as per literature report.<sup>3</sup>

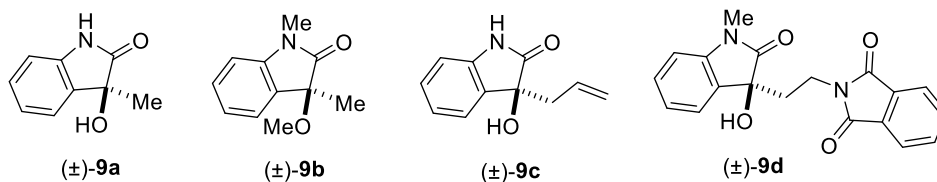

Compound (±)-**9a**<sup>4</sup> and compounds (±)-**9b-d**<sup>5</sup> were synthesized as per literature reports.

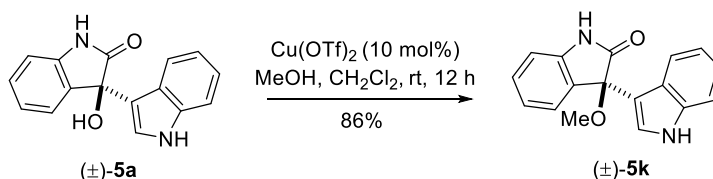

**Synthetic procedure for the compound (±)-5k:** In an oven-dried round bottom flask was charged with oxindole (±)-**5a** (1 g; 3.8 mmol; 1.0 equiv) in dichloromethane (15 mL) under nitrogen atmosphere at 25 °C Lewis acid (0.38 mmol, 10 mol %) and MeOH (765  $\mu$ L; 18.9 mmol, 5.0 equiv) was added. Then the reaction mixture was allowed to stir for 12 h. Upon completion of starting material (judged by TLC analysis under UV light and  $\text{I}_2$  stain), the reaction mixture was quenched with water (20 mL) and organic compound was extracted with ethyl acetate (2 X 30 mL). The combined organic layers were dried over anhydrous sodium sulphate and concentrated under reduced pressure. The crude product was purified through column chromatography using 25-40% (EtOAc/Hexane) as eluent to afford the desired product.

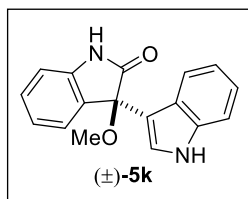

**3-(1*H*-Indol-3-yl)-3-methoxyindolin-2-one:** Compound (±)-**5k** was obtained as an orange solid (3.0 mmol scale of reaction, 760 mg of product, 92% yield);  $R_f$  = 3.3 (50% EtOAc in hexane); <sup>1</sup>H NMR (400 MHz, DMSO-*d*<sub>6</sub>)  $\delta$  11.08 (s, 1H), 10.58 (s, 1H), 7.58 (d,  $J$  = 8.0 Hz, 1H), 7.34 (dd,  $J$  = 13.9, 7.6 Hz, 3H), 7.06 (q,  $J$  = 8.1 Hz, 2H), 6.97 - 6.92 (m, 3H), 3.43 (Water), 3.15 (s, 3H); <sup>13</sup>C NMR (101 MHz, DMSO-*d*<sub>6</sub>)  $\delta$  176.4, 142.8, 137.2, 130.3, 128.8, 125.7, 125.5, 124.8, 122.4, 121.8, 121.4, 119.2, 113.2, 112.0, 110.5,

81.7, 52.3; **IR** (film)  $\nu_{\text{max}}$  3338, 2956, 2354, 1710, 1621, 1616, 1569, 1470, 1292, 1105, 1012, 921, 750  $\text{cm}^{-1}$ .

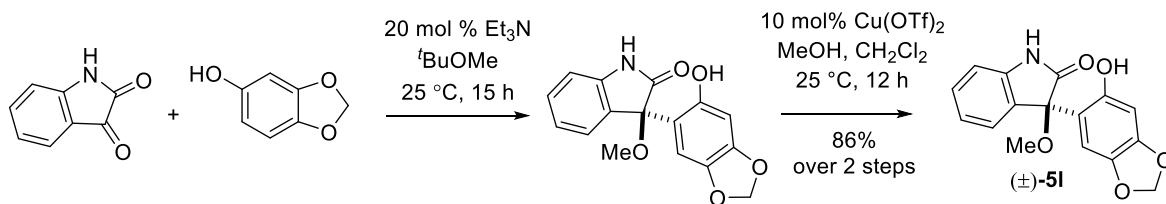

**Synthetic procedure for the compound (±)-5I:** In an oven-dried round bottom flask was charged with isatin (1g; 6.8 mmol; 1.0 equiv) in methyl *tert*-butyl ether (15 mL) under nitrogen atmosphere at 25 °C. To this solution, sesamol (8.2 mmol, 1.2 equiv) and  $\text{Et}_3\text{N}$  (1.3 mmol, 20 mol%) was added sequentially and the reaction mixture was allowed to stir for 15 h. Upon completion of starting material (judged by TLC analysis), the reaction mixture was quenched with water (20 mL) and organic compound was extracted with ethyl acetate (2 X 30 mL). Then the combined organic layers were dried over anhydrous sodium sulphate and concentrated under reduced pressure. This crude product was used for next step without purification.

To the crude product of 3-hydroxy 2-oxindoles (~6.3 mmol; 1.0 equiv) in dichloromethane (30 mL) under nitrogen atmosphere at 25 °C Lewis acid (~0.63 mmol, 10 mol %) and  $\text{MeOH}$  (~31.5 mmol, 5.0 equiv) was added. Then the reaction mixture was allowed to stir for 12 h. Upon completion of starting material (judged by TLC analysis under UV light and  $\text{I}_2$  stain), the reaction mixture was quenched with water (30 mL) and organic compound was extracted with ethyl acetate (2 X 40 mL). The combined organic layers were dried over anhydrous sodium sulphate and concentrated under reduced pressure. The crude product was purified through column chromatography using 30-40% ( $\text{EtOAc}/\text{Hexane}$ ) as eluent to afford the desired product.

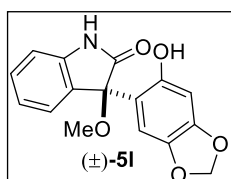



**3-(6-Hydroxybenzo[*d*][1,3]dioxol-5-yl)-3-methoxyindolin-2-one:** Compound (±)-**5l** was obtained as orange solid (6.8 mmol scale of reaction, 1.7 g of product, 86% yield over two steps);  $R_f = 3.3$  (50% EtOAc in hexane);  $^1\text{H NMR}$  (500 MHz,  $\text{DMSO-}d_6$ )  $\delta$  10.50 (s, 1H), 9.19 (s, 1H), 7.21 (ddd,  $J = 7.8, 5.9, 3.0$  Hz, 1H), 7.16 (s, 1H), 6.91 - 6.89 (m, 2H), 6.84 (d,  $J = 7.7$  Hz, 1H), 6.27 (s, 1H), 5.93 (d,  $J = 8.6$  Hz, 2H), 3.46 (Water), 3.04 (s, 3H);  $^{13}\text{C NMR}$  (125 MHz,  $\text{DMSO-}d_6$ )  $\delta$  176.3, 148.9, 147.2, 144.2, 140.0, 129.8, 128.7, 124.8, 122.1, 118.8, 109.7, 106.9, 101.2, 98.0, 81.0, 51.4; **IR** (film)  $\nu_{\text{max}}$  3382, 2916, 2255, 1722, 1631, 1614, 1568, 1452, 1390, 1105, 1002, 911, 720  $\text{cm}^{-1}$ .

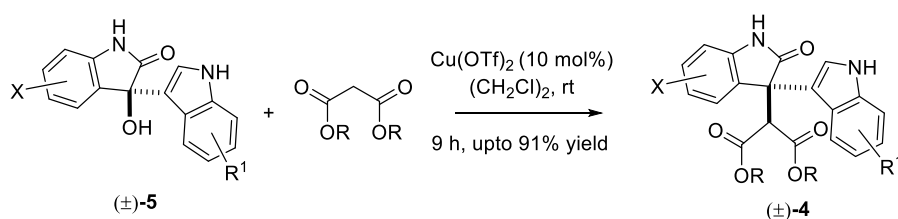

**General procedure for the synthesis of (±)-4a-t:** 3-Hydroxy 2-oxindoles (0.38 mmol; 1.0 equiv) was taken in dry dichloromethane (2 mL) under nitrogen atmosphere and 10 mol %  $\text{Cu(OTf)}_2$  was added to this at room temperature under argon atmosphere. After 5 minutes stirring at room temperature, malonate (3 equiv) was added drop-wise over a period of 5 minutes. Then the reaction mixture was allowed to stir for 9 h. Upon completion of starting material (judged by TLC analysis under UV light and  $\text{I}_2$  stain), the crude mixture was concentrated under reduced pressure and product was purified by column chromatography by using 25-40% (EtOAc/Hexane) as eluent to afford the desired products.

**Table.** Optimization of enantioselective malonate addition of (±)-**5a** with diethylmalonate.<sup>a,b</sup>

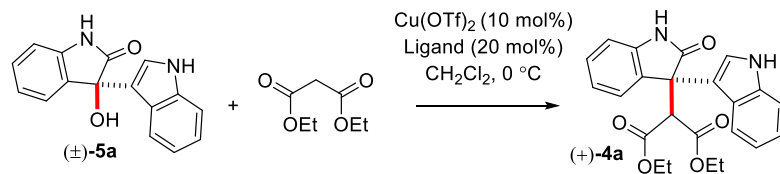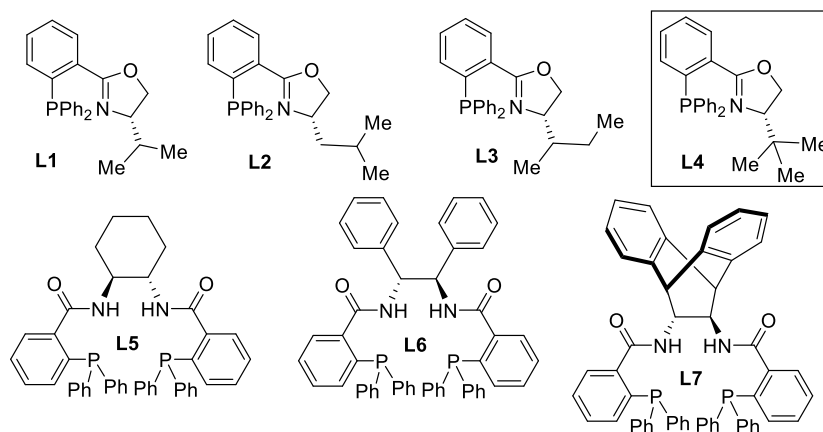

| entry          | catalyst             | ligand            | solvent                           | temp.     | time | % yield | % ee |
|----------------|----------------------|-------------------|-----------------------------------|-----------|------|---------|------|
| 1              | Cu(OTf) <sub>2</sub> | 12 mol% <b>L1</b> | CH <sub>2</sub> Cl <sub>2</sub>   | 25 °C     | 12 h | 79%     | 52%  |
| 2              | Cu(OTf) <sub>2</sub> | 12 mol% <b>L2</b> | CH <sub>2</sub> Cl <sub>2</sub>   | 25 °C     | 13 h | 80%     | 38%  |
| 3              | Cu(OTf) <sub>2</sub> | 12 mol% <b>L3</b> | CH <sub>2</sub> Cl <sub>2</sub>   | 25 °C     | 12 h | 81%     | 51%  |
| 4              | Cu(OTf) <sub>2</sub> | 12 mol% <b>L4</b> | CH <sub>2</sub> Cl <sub>2</sub>   | 25 °C     | 13 h | 84%     | 72%  |
| 5              | Cu(OTf) <sub>2</sub> | 12 mol% <b>L4</b> | CH <sub>2</sub> Cl <sub>2</sub>   | 0 °C      | 16 h | 83%     | 82%  |
| 6              | Cu(OTf) <sub>2</sub> | 20 mol% <b>L4</b> | CH <sub>2</sub> Cl <sub>2</sub>   | 0 °C      | 15 h | 84%     | 92%  |
| 7              | Cu(OTf) <sub>2</sub> | 10 mol% <b>L4</b> | CH <sub>2</sub> Cl <sub>2</sub>   | 0 °C      | 17 h | 75%     | 80%  |
| 8 <sup>c</sup> | Cu(OTf) <sub>2</sub> | 20 mol% <b>L4</b> | CH <sub>2</sub> Cl <sub>2</sub>   | 0 °C      | 16 h | 79%     | 86%  |
| 9              | Cu(OTf) <sub>2</sub> | 20 mol% <b>L4</b> | CH <sub>2</sub> Cl <sub>2</sub>   | -5 °C     | 16 h | 75%     | 88%  |
| 10             | Cu(OTf) <sub>2</sub> | 20 mol% <b>L4</b> | CH <sub>2</sub> Cl <sub>2</sub>   | -5 °C     | 28 h | 83%     | 94%  |
| 11             | Cu(OTf) <sub>2</sub> | 20 mol% <b>L4</b> | CH <sub>2</sub> Cl <sub>2</sub>   | -10 °C    | 45 h | 69%     | 88%  |
| 12             | Cu(OTf) <sub>2</sub> | 20 mol% <b>L4</b> | CH <sub>2</sub> Cl <sub>2</sub>   | -15 °C    | 21 h | 70%     | 75%  |
| 13             | Cu(OTf) <sub>2</sub> | 20 mol% <b>L4</b> | CH <sub>2</sub> Cl <sub>2</sub>   | 0 - 25 °C | 12 h | 85%     | 82%  |
| 14             | Cu(OTf) <sub>2</sub> | 20 mol% <b>L4</b> | PhMe                              | 0 °C      | 12 h | 75%     | 71%  |
| 15             | Cu(OTf) <sub>2</sub> | 20 mol% <b>L4</b> | THF                               | 0 °C      | 6 h  | 83%     | 14%  |
| 16             | Cu(OTf) <sub>2</sub> | 20 mol% <b>L4</b> | CHCl <sub>3</sub>                 | 0 °C      | 9 h  | 55%     | 61%  |
| 17             | Cu(OTf) <sub>2</sub> | 20 mol% <b>L4</b> | (CH <sub>2</sub> Cl) <sub>2</sub> | 0 °C      | 20 h | 55%     | 22%  |
| 18             | Cu(OTf) <sub>2</sub> | 20 mol% <b>L4</b> | DCB <sup>c</sup>                  | 0 °C      | 15 h | 85%     | 59%  |
| 19             | Cu(OTf) <sub>2</sub> | 20 mol% <b>L5</b> | CH <sub>2</sub> Cl <sub>2</sub>   | 0 °C      | 19 h | 78%     | 24%  |

|    |                      |                   |                                 |      |      |     |     |
|----|----------------------|-------------------|---------------------------------|------|------|-----|-----|
| 20 | Cu(OTf) <sub>2</sub> | 20 mol% <b>L6</b> | CH <sub>2</sub> Cl <sub>2</sub> | 0 °C | 19 h | 72% | 39% |
| 21 | Cu(OTf) <sub>2</sub> | 20 mol% <b>L7</b> | CH <sub>2</sub> Cl <sub>2</sub> | 0 °C | 17 h | 80% | 40% |
| 22 | In(OTf) <sub>3</sub> | 20 mol% <b>L4</b> | CH <sub>2</sub> Cl <sub>2</sub> | 0 °C | 15 h | 20% | 00% |
| 23 | Cu(OTf).P<br>hMe     | 12 mol% <b>L4</b> | CH <sub>2</sub> Cl <sub>2</sub> | 0 °C | 17 h | 82% | 77% |
| 24 | Cu(OTf).P<br>hMe     | 20 mol%           | CH <sub>2</sub> Cl <sub>2</sub> | 0 °C | 16 h | 86% | 83% |

<sup>a</sup>All the reactions were carried out on a 0.08 mmol of **5a**, 0.23 mmol of dialkylmalonate in 3 mL of dichloromethane at 0 °C. <sup>b</sup>Isolated yields after column chromatography. <sup>c</sup>Reactions were carried out on a 0.08 mmol of **5a**, 0.16 mmol of dialkylmalonate in 3 mL of dichloromethane at 0 °C.

**General procedure for the synthesis of enantioselective compounds: (*R*)-**4a-s**, (+)-**4t**:**

An oven dried sample vial was charged with Lewis acid (0.1 equiv) and ligand (0.2 equiv) in dichloromethane (4 mL) at 25 °C under nitrogen atmosphere. The reaction mixture was stirred for 30 minutes to make the complex. After that the reaction vessel was cooled to 0 °C and malonate (3.0 equiv) was added to the mixture and stirring was continued for 15 minutes maintaining temperature 0 °C. Then, a solution of 3-hydroxy 2-oxindole in dichloromethane (0.5 mL) was added slowly to the reaction mixture. Then the reaction mixture was allowed to stir for respective times at 0 °C for condition A and -5 °C for condition B. After complete consumption of starting material (as judged by running TLC), the crude mixture was concentrated under reduced pressure and purified by column chromatography by using 30-40% EtOAc-hexane mixture as eluent to afford the desired compound.

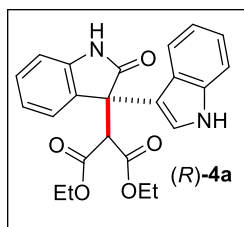

**Diethyl (*R*)-2-(3-(1*H*-indol-3-yl)-2-oxindolin-3-yl)malonate:** Compound (*R*)-**4a** was obtained as yellow solid (0.08 mmol scale of reaction, 26 mg of product, 80% yield);  $R_f$  = 0.50 (50% EtOAc in hexane); <sup>1</sup>H NMR (400 MHz, 0.4 mL CDCl<sub>3</sub>, 0.1 mL DMSO-*D*<sub>6</sub>)  $\delta$  9.63 (brs, 1H), 9.49 (brs, 1H), 7.80 (d, *J* = 7.2 Hz, 1H), 7.63 (d, *J* = 7.7 Hz, 1H), 7.10 (t, *J*

= 8.3 Hz, 2H), 6.91 - 6.80 (m, 3H), 6.76 (d,  $J = 7.7$  Hz, 1H), 6.51 - 6.50 (m, 1H), 4.99 (s, 1H), 3.77 - 3.66 (m, 4H), 0.76 (t,  $J = 14.2$  Hz, 3H), 0.62 (t,  $J = 14.2$  Hz, 3H);  $^{13}\text{C}$  NMR (100 MHz, 0.4 mL  $\text{CDCl}_3$ , 0.1 mL  $\text{DMSO}-d_6$ )  $\delta$  178.4, 167.3, 166.9, 142.5, 136.9, 129.8, 128.3, 126.9, 124.9, 124.2, 121.7, 121.4, 121.3, 118.8, 111.9, 111.2, 109.5, 61.1, 60.6, 56.4, 53.4, 13.2, 13.1; **IR** (film)  $\nu_{\text{max}}$  3375, 2989, 2359, 1724, 1615, 1265, 1034, 747, 700  $\text{cm}^{-1}$ ; **HRMS** (ESI)  $m/z$   $[\text{M} + \text{H}]^+$  Calcd for  $[\text{C}_{19}\text{H}_{19}\text{N}_2\text{O}_5]^+$  407.1601; Found 407.1604; **MP** 170 - 172  $^{\circ}\text{C}$ ; Enantiomeric excess of pure compound was determined via HPLC analysis using a Chiralpak ID-3 column; solvent: hexane/2-propanol = 50/50; flow rate: 1.0 mL/min; detection: at 254 nm):  $t_R$  minor = 4.88 min,  $t_R$  major = 5.92 min.  $[\alpha]_D^{23.0} = +128.6$  ( $c = 0.18$ ,  $\text{CH}_2\text{Cl}_2$  for 94% ee).

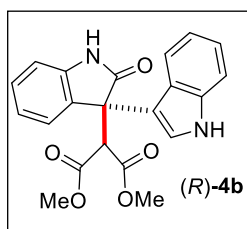

**Dimethyl (*R*)-2-(3-(1*H*-indol-3-yl)-2-oxoindolin-3-yl)malonate:** Compound (*R*)-**4b** was obtained as a colorless solid (0.08 mmol scale of reaction, 24 mg of product, 82% yield);  $R_f = 0.48$  (50% EtOAc in hexane);  $^1\text{H}$  NMR (500 MHz, 0.4 mL  $\text{CDCl}_3$ , 0.1 mL  $\text{DMSO}-d_6$ )  $\delta$  9.25 (s, 1H), 9.18 (s, 1H), 7.87 (d,  $J = 7.6$  Hz, 1H), 7.62 (d,  $J = 8.2$  Hz, 1H), 7.20 (t,  $J = 7.1$  Hz, 2H), 7.01 (q,  $J = 8.0$  Hz, 2H), 6.95 (d,  $J = 7.9$  Hz, 1H), 6.86 (d,  $J = 7.8$  Hz, 1H), 6.65 (s, 1H), 5.15 (s, 1H), 3.40 (s, 3H), 3.38 (s, 3H);  $^{13}\text{C}$  NMR (125 MHz, 0.4 mL  $\text{CDCl}_3$ , 0.1 mL  $\text{DMSO}-d_6$ )  $\delta$  178.5, 168.0, 167.4, 142.4, 137.1, 129.8, 128.7, 127.1, 124.9, 124.4, 121.9, 121.7, 121.5, 119.4, 111.9, 111.5, 109.9, 56.5, 53.6, 52.4, 52.2; **IR** (film)  $\nu_{\text{max}}$  3361, 3059, 2983, 2938, 2308, 1720, 1455, 1316, 1104, 1015, 913, 838, 743  $\text{cm}^{-1}$ ; **HRMS** (ESI)  $m/z$   $[\text{M} + \text{H}]^+$  Calcd for  $[\text{C}_{21}\text{H}_{19}\text{N}_2\text{O}_5]^+$  379.1288; Found 379.1309; **MP** 240 - 242  $^{\circ}\text{C}$ ; Enantiomeric excess of pure compound was determined *via* HPLC analysis using a Chiralpak OZ-3 column; solvent: hexane/2-propanol = 70/30; flow rate: 1.0 mL/min; detection: at 254 nm):  $t_R$  minor = 11.71 min,  $t_R$  major = 14.29 min.  $[\alpha]_D^{22.1} = +250.0$  ( $c = 0.22$ ,  $\text{CHCl}_3$  for 89% ee).

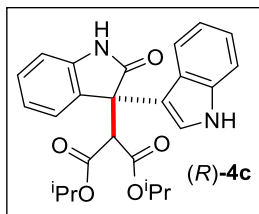

**Diisopropyl (R)-2-(3-(1H-indol-3-yl)-2-oxoindolin-3-yl)malonate:** Compound (R)-4c was obtained as a yellow solid (0.08 mmol scale of reaction, 27 mg of product, 79% yield);  $R_f = 0.52$  (50% EtOAc in hexane);  $^1\text{H NMR}$  (400 MHz,  $\text{CDCl}_3$ )  $\delta$  8.63 (brs, 1H), 8.15 (brs, 1H), 8.05 (d,  $J = 6.0$  Hz, 1H), 7.92 (d,  $J = 6.3$  Hz, 1H), 7.24 - 7.18 (m, 2H), 7.06 - 7.05 (m, 3H), 6.84 (m, 1H), 6.53 (s, 1H), 5.16 (s, 1H), 4.71 - 4.70 (m, 2H), 1.01 - 0.91 (m, 6H), 0.68 - 0.59 (m, 6H);  $^{13}\text{C NMR}$  (100 MHz,  $\text{CDCl}_3$ )  $\delta$  179.1, 167.1, 166.6, 141.9, 137.0, 129.9, 128.7, 127.5, 125.1, 124.2, 122.4, 122.3, 122.1, 119.6, 112.8, 111.3, 109.9, 69.5, 68.6, 56.8, 53.7, 21.3, 21.2, 20.6, 20.6; **IR** (film)  $\nu_{\text{max}}$  3340, 2975, 2340, 2320, 1720, 1620, 1600, 1265, 1005, 1051, 700, 692  $\text{cm}^{-1}$ ; **HRMS** (ESI)  $m/z$   $[\text{M} + \text{H}]^+$  Calcd for  $[\text{C}_{25}\text{H}_{27}\text{N}_2\text{O}_5]^+$  435.1914; Found 435.1900; **MP** 110 - 112  $^{\circ}\text{C}$ ; Enantiomeric excess of pure compound was determined *via* HPLC analysis using a Chiralpak IB column; solvent: hexane/2-propanol = 40/30; flow rate: 1.0 mL/min; detection: at 254 nm):  $t_R$  minor = 5.45 min,  $t_R$  major = 6.32 min.  $[\alpha]_D^{23.0} = +179.7$  ( $c = 0.30$ ,  $\text{CHCl}_3$  for 89% ee).

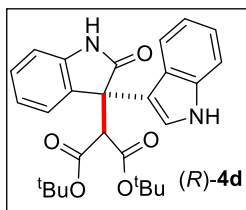

**Ditert-butyl (R)-2-(3-(1H-indol-3-yl)-2-oxoindolin-3-yl)malonate:** Compound (R)-4d was obtained as a colorless solid. (0.08 mmol scale of reaction, 29 mg of product, 79% yield);  $R_f = 0.56$  (50% EtOAc in hexane);  $^1\text{H NMR}$  (400 MHz,  $\text{CDCl}_3$ )  $\delta$  8.35 (brs, 1H), 8.11 - 8.02 (m, 3H), 7.28 - 7.25 (m, 2H), 7.12 - 7.04 (m, 3H), 6.88 (d,  $J = 7.7$  Hz, 1H), 6.55 (s, 1H), 5.08 (s, 1H), 1.05 (s, 9H), 0.99 (s, 9H);  $^{13}\text{C NMR}$  (100 MHz,  $\text{CDCl}_3$ )  $\delta$  179.2, 166.8, 166.5, 141.7, 137.1, 130.4, 128.6, 127.7, 125.3, 124.2, 122.90, 122.4, 122.2, 119.6, 113.4, 111.2, 109.6, 82.6, 81.4, 58.1, 53.8, 27.3, 27.1; **IR** (film)  $\nu_{\text{max}}$  3340, 2975,

2340, 2320, 1720, 1620, 1600, 1265, 1051, 700, 692  $\text{cm}^{-1}$ ; **HRMS** (ESI)  $m/z$   $[\text{M} + \text{Na}]^+$  Calcd for  $[\text{C}_{27}\text{H}_{30}\text{N}_2\text{O}_5 + \text{Na}]^+$  485.2047; Found 485.2076; **MP** 138 - 140  $^{\circ}\text{C}$ ; Enantiomeric excess of pure compound was determined *via* HPLC analysis using a Chiralpak OD-3 column; solvent: hexane/2-propanol = 50/50; flow rate: 1.0 mL/min; detection: at 254 nm):  $t_{\text{R}}$  minor = 4.78 min,  $t_{\text{R}}$  major = 6.86 min.  $[\alpha]_{\text{D}}^{23.1} = +105.2$  ( $c = 0.18$ ,  $\text{CHCl}_3$  for 77% ee).

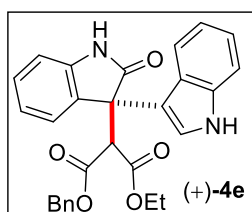

**(+)-1-Benzyl-3-ethyl-2-(-3-(1H-indol-3-yl)-2-oxoindolin-3-yl)malonate:** Compound **(+)-4e** was obtained as a yellow solid (0.08 mmol scale of reaction, 31 mg of product, 83% yield);  $R_f = 0.56$  (50% EtOAc in hexane);  $^1\text{H NMR}$  (400 MHz,  $\text{DMSO}-d_6$ )  $\delta$  10.97 (brs, 1H for major diastereomer + 1H for minor diastereomer), 10.47 (brs, 1H for minor diastereomer), 10.46 (s, 1H for major diastereomer), 7.76 (d,  $J = 7.3$  Hz, 1H for minor diastereomer), 7.71 (d,  $J = 7.3$  Hz, 1H for major diastereomer), 7.53 (d,  $J = 8.0$  Hz, 1H for major diastereomer), 7.49 (d,  $J = 8.1$  Hz, 1H for minor diastereomer), 7.36 - 7.22 (m, 3H for major diastereomer + 3H for minor diastereomer), 7.27 - 7.16 (m, 2H for major diastereomer + 2H for minor diastereomer), 7.04 - 6.95 (m, 3H for major diastereomer + 3H for minor diastereomer), 6.90 - 6.83 (m, 3H for major diastereomer + 3H for minor diastereomer), 6.66 (s, 1H for minor diastereomer), 6.63 (s, 1H for major diastereomer), 5.02 (s, 1H for major diastereomer), 5.01 (s, 1H for minor diastereomer), 4.93 - 4.81 (m, 2H for major diastereomer + 2H for minor diastereomer), 4.35 (Water), 3.81 - 3.80 (m, 2H for major diastereomer + 2H for minor diastereomer), 0.80 (t,  $J = 6.9$  Hz, 3H for major diastereomer), 0.65 (t,  $J = 6.8$  Hz, 3H for minor diastereomer);  $^{13}\text{C NMR}$  (100 MHz,  $\text{DMSO}-d_6$ )  $\delta$  178.1, 177.9, 167.4, 167.3, 166.90, 166.87, 143.5, 143.4, 137.4, 137.3, 135.7, 135.5, 130.2, 130.1, 129.13, 129.11, 128.8, 128.6, 128.5, 128.2, 127.9, 127.7, 127.2, 127.0, 125.3, 125.2, 124.92, 124.91, 121.8, 121.75, 121.72, 121.67, 121.63 (2 C), 119.2, 119.0, 112.5, 112.1, 111.9, 111.8, 110.2, 110.1, 66.9, 66.7, 61.7, 61.1, 56.65, 56.61, 53.5, 53.4, 13.7, 13.6; **IR** (film)  $\nu_{\text{max}}$  3700, 3464, 2918, 2352, 1725, 1458,

1322, 1241, 1148, 738  $\text{cm}^{-1}$ ; **HRMS** (ESI)  $m/z$   $[\text{M} + \text{Na}]^+$  Calcd for  $[\text{C}_{28}\text{H}_{24}\text{N}_2\text{O}_5 + \text{Na}]^+$  491.1577; Found 491.1602; **MP** 190 - 192  $^{\circ}\text{C}$ ; Enantiomeric excess of pure compound was determined *via* HPLC analysis using a Chiralpak AD-H column; solvent: hexane/2-propanol = 50/50; flow rate: 1.0 mL/min; detection: at 254 nm): in case of minor diastereomer ( $t_{\text{R}}$  minor = 9.40 min,  $t_{\text{R}}$  major = 17.854 min. 84% ee), in case of major diastereomer ( $t_{\text{R}}$  minor = 11.88 min,  $t_{\text{R}}$  major = 22.05 min. 85% ee).  $[\alpha]_{\text{D}}^{22.0} = +192.1$  ( $c = 0.26$ , in  $\text{CHCl}_3$ ).

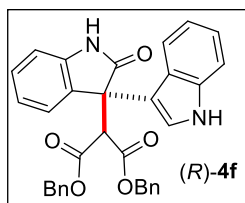

**Dibenzyl (R)-2-(3-(1H-indol-3-yl)-2-oxoindolin-3-yl)malonate:** Compound (*R*)-**4f** was obtained as a yellow solid (0.08 mmol scale of reaction 38 mg of product 90% yield);  $R_f = 0.60$  (50% EtOAc in hexane);  $^1\text{H NMR}$  (500 MHz,  $\text{CDCl}_3$ )  $\delta$  7.99 (d,  $J = 7.6$  Hz, 1H), 7.97 (s, 1H), 7.88 (d,  $J = 8.2$  Hz, 1H), 7.68 (s, 1H), 7.28 – 7.23 (m, 6H), 7.19 – 7.15 (m, 3H), 7.09 – 7.04 (m, 4H), 6.86 (d,  $J = 7.1$  Hz, 2H), 6.73 (d,  $J = 7.7$  Hz, 1H), 6.62 (d,  $J = 2.7$  Hz, 1H), 5.37 (s, 1H), 4.91 (m, 4H);  $^{13}\text{C NMR}$  (125 MHz,  $\text{CDCl}_3$ )  $\delta$  178.0, 167.2, 166.7, 141.4, 136.9, 135.0, 134.7, 129.4, 128.7, 128.4, 128.2, 128.2, 128.1, 127.9, 127.9, 127.3, 124.9, 124.3, 122.3, 122.3, 122.0, 120.0, 112.3, 111.4, 109.8, 67.3, 67.0, 56.5, 53.4; **IR** (film)  $\nu_{\text{max}}$  3390, 2928, 2251, 1729, 1621, 1400, 1360, 1311, 1260, 1100, 1022, 756, 698  $\text{cm}^{-1}$ ; **HRMS** (ESI)  $m/z$   $[\text{M} + \text{H}]^+$  Calcd for  $[\text{C}_{33}\text{H}_{27}\text{N}_2\text{O}_5]^+$  531.1914; Found 531.1939; **MP** 180 - 182  $^{\circ}\text{C}$ ; Enantiomeric excess of pure compound was determined *via* HPLC analysis using a Chiralpak OD-3 column; solvent: hexane/2-propanol = 50/50; flow rate: 1.0 mL/min; detection: at 254 nm):  $t_{\text{R}}$  minor = 4.69 min,  $t_{\text{R}}$  major = 9.21 min.  $[\alpha]_{\text{D}}^{21.0} = +222.6$  ( $c = 0.18$ , MeOH for >99% ee).

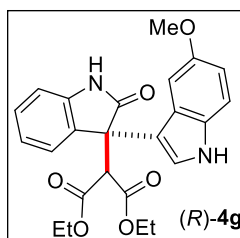

**Diethyl (R)-2-(3-(5-methoxy-1H-indol-3-yl)-2-oxoindolin-3-yl)malonate:** Compound (*R*)-**4g** was obtained as a colorless solid (0.08 mmol scale of reaction, 27 mg of product, 73% yield);  $R_f = 0.56$  (50% EtOAc in hexane);  $^1\text{H NMR}$  (400 MHz, DMSO- $\text{D}_6$ )  $\delta$  10.82 (s, 1H), 10.46 (s, 1H), 7.76 (d,  $J = 7.4$  Hz, 1H), 7.27 (td,  $J = 7.7, 0.9$  Hz, 1H), 7.16 (d,  $J = 8.8$  Hz, 1H), 7.01 (t,  $J = 7.3$  Hz, 1H), 6.90 (d,  $J = 7.7$  Hz, 1H), 6.76 (d,  $J = 1.8$  Hz, 1H), 6.66 - 6.63 (m, 2H), 4.86 (s, 1H), 3.90 - 3.76 (m, 4H), 3.58 (s, 3H), 3.48 (Water), 0.79 (t,  $J = 7.1$  Hz, 3H), 0.75 (t,  $J = 7.1$  Hz, 3H);  $^{13}\text{C NMR}$  (100 MHz, DMSO- $\text{D}_6$ )  $\delta$  178.2, 167.4, 167.0, 153.1, 143.6, 132.4, 130.2, 129.2, 127.3, 125.6, 125.3, 121.7, 112.6, 111.6, 111.4, 110.0, 103.6, 61.6, 61.0, 56.6, 55.6, 53.3, 13.7, 13.7; **IR** (film)  $\nu_{\text{max}}$  3381, 2982, 1715, 1471, 1371, 1299, 1246, 1189, 1031, 860, 816, 741  $\text{cm}^{-1}$ ; **HRMS** (ESI)  $m/z$   $[\text{M} + \text{Na}]^+$  Calcd for  $[\text{C}_{24}\text{H}_{24}\text{N}_2\text{O}_6 + \text{Na}]^+$  459.1527; Found 459.1551; **MP** 130 - 132  $^{\circ}\text{C}$ ; Enantiomeric excess of pure compound was determined *via* HPLC analysis using a Chiralpak IE-3 column; solvent: hexane/2-propanol = 50/50; flow rate: 1.0 mL/min; detection: at 254 nm):  $t_R$  minor = 8.60 min,  $t_R$  major = 10.81 min.  $[\alpha]_{\text{D}}^{24.0} = +110.0$  ( $c = 0.20$ ,  $\text{CHCl}_3$  for 76% ee).

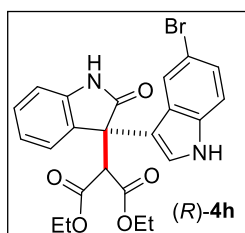

**Diethyl (R)-2-(3-(5-bromo-1H-indol-3-yl)-2-oxoindolin-3-yl)malonate:** Compound (*R*)-**4h** was obtained as a brown solid (0.08 mmol scale of reaction, 30 mg of product, 77% yield);  $R_f = 0.56$  (50% EtOAc in hexane);  $^1\text{H NMR}$  (500 MHz, DMSO- $\text{D}_6$ )  $\delta$  11.23 (s, 1H), 10.57 (s, 1H), 7.82 - 7.76 (m, 2H), 7.35 - 7.30 (m, 2H), 7.18 (d,  $J = 8.7$  Hz, 1H), 7.08 (d,  $J = 7.8$  Hz, 1H), 6.94 (t,  $J = 6.1$  Hz, 1H), 6.73 (s, 1H), 4.91 (s, 1H), 3.93 - 3.81 (m, 4H), 0.84 (t,  $J = 7.1$  Hz, 3H), 0.73 (t,  $J = 3.1$  Hz, 3H);  $^{13}\text{C NMR}$  (125 MHz, DMSO-



D<sub>6</sub>)  $\delta$  178.0, 167.2, 166.7, 143.4, 136.1, 129.8, 129.2, 127.0, 126.9, 126.6, 124.1, 124.1, 121.8, 114.2, 111.8, 111.8, 110.1, 61.6, 61.0, 56.7, 53.2, 13.7, 13.6; **IR** (film)  $\nu_{\max}$  3260, 3063, 2922, 2359, 1712, 1616, 1469, 1217, 1097, 1018, 746  $\text{cm}^{-1}$ ; **HRMS** (ESI)  $m/z$   $[M + Na]^+$  Calcd for  $[C_{23}H_{21}BrN_2O_5+Na]^+$  507.0526; Found 507.0534; **MP** 120 - 122  $^{\circ}\text{C}$ ; Enantiomeric excess of pure compound was determined *via* HPLC analysis using a Chiralpak IB column; solvent: hexane/2-propanol = 70/30; flow rate: 1.0 mL/min; detection: at 254 nm):  $t_R$  minor = 4.72 min,  $t_R$  major = 6.65 min.  $[\alpha]_D^{24.1} = +198.2$  ( $c = 0.19$ ,  $\text{CHCl}_3$  for 88% ee).

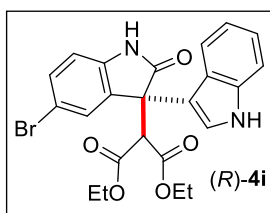

**Diethyl (R)-2-(5-bromo-3-(1H-indol-3-yl)-2-oxoindolin-3-yl)malonate:** Compound (*R*)-**4i** was obtained as a brown solid (0.08 mmol scale of reaction, 27 mg of product, 70% yield);  $R_f = 0.60$  (50% EtOAc in hexane);  **$^1\text{H}$  NMR** (100 MHz,  $\text{DMSO}-d_6$ ) 11.02 (s, 1H), 10.65 (s, 1H), 7.96 - 7.95 (m, 1H), 7.50 (t,  $J = 6.7$  Hz, 2H), 7.32 (d,  $J = 8.3$  Hz, 1H), 7.04 (t,  $J = 7.6$  Hz, 1H), 6.92 - 6.87 (m, 2H), 6.70 (d,  $J = 2.7$  Hz, 1H), 4.95 (s, 1H), 3.92 - 3.79 (m, 4H), 3.34 (s, 3H), 0.87 (t,  $J = 7.1$  Hz, 3H), 0.71 (t,  $J = 7.1$  Hz, 3H);  **$^{13}\text{C}$  NMR** (100 MHz,  $\text{DMSO}-d_6$ )  $\delta$  177.5, 167.3, 166.7, 142.9, 137.3, 132.6, 131.8, 129.8, 125.0, 124.7, 121.7, 121.6, 119.1, 113.3, 112.2, 112.0, 111.1, 61.7, 61.1, 56.4, 53.6, 13.7, 13.6; **IR** (film)  $\nu_{\max}$  3381, 2982, 1715, 1471, 1371, 1299, 1246, 1189, 1031, 860, 816, 741  $\text{cm}^{-1}$ ; **HRMS** (ESI)  $m/z$   $[M + Na]^+$  Calcd for  $[C_{23}H_{21}BrN_2O_5+Na]^+$  507.0526; Found 507.0530; **MP** 180 - 182  $^{\circ}\text{C}$ ; Enantiomeric excess of pure compound was determined *via* HPLC analysis using a Chiralpak IB column; solvent: hexane/2-propanol = 70/30; flow rate: 1.0 mL/min; detection: at 254 nm):  $t_R$  minor = 6.00 min,  $t_R$  major = 11.09 min.  $[\alpha]_D^{25.0} = +180.7$  ( $c = 0.17$ ,  $\text{CHCl}_3$  for 88% ee).

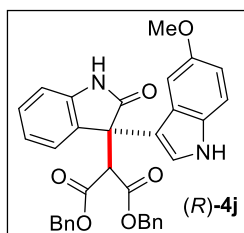

**Dibenzy (R)-2-(3-(5-methoxy-1H-indol-3-yl)-2-oxoindolin-3-yl)malonate:** Compound (R)-**4j** was obtained as a colorless solid (0.08 mmol scale of reaction, 36 mg of product, 80% yield);  $R_f$  = 0.57 (50% EtOAc in hexane);  $^1\text{H NMR}$  (400 MHz, 0.5 mL  $\text{CDCl}_3$ , 0.1 mL  $\text{DMSO}-d_6$ )  $\delta$  9.05 (s, 1H), 8.95 (s, 1H), 7.91 (d,  $J$  = 7.5 Hz, 1H), 7.23 - 7.14 (m, 4H), 7.16 - 7.09 (m, 3H), 7.08 (d,  $J$  = 2.5 Hz, 1H), 7.03 - 6.92 (m, 3H), 6.87 - 6.78 (m, 2H), 6.76 (d,  $J$  = 7.7 Hz, 1H), 6.72 (dd,  $J$  = 8.8, 2.5 Hz, 1H), 6.63 (d,  $J$  = 2.8 Hz, 1H), 5.24 (s, 1H), 4.91 - 4.68 (m, 4H), 3.62 (s, 3H), 2.36 (Water);  $^{13}\text{C NMR}$  (125 MHz,  $\text{DMSO}-d_6$ )  $\delta$  178.1, 167.1, 166.7, 153.5, 142.1, 134.8, 134.6, 132.0, 129.4, 128.4, 128.2, 128.1, 127.9, 127.8, 127.7, 127.7, 127.2, 125.1, 124.9, 121.7, 112.3, 111.9, 111.4, 109.7, 103.0, 67.0, 66.7, 56.3, 55.4, 53.3; **IR** (film)  $\nu_{\text{max}}$  3377, 2355, 1713, 1615, 1469, 1308, 1214, 1146, 735  $\text{cm}^{-1}$ ; **HRMS** (ESI)  $m/z$   $[\text{M} + \text{Na}]^+$  Calcd for  $[\text{C}_{34}\text{H}_{28}\text{N}_2\text{O}_6 + \text{Na}]^+$  583.1840; Found 583.1855; **MP** 158 - 160  $^\circ\text{C}$ ; Enantiomeric excess of pure compound was determined *via* HPLC analysis using a Chiralpak OD-3 column; solvent: hexane/2-propanol = 60/40; flow rate: 1.0 mL/min; detection: at 254 nm):  $t_R$  minor = 5.60 min,  $t_R$  major = 16.12 min.  $[\alpha]_D^{22.5} = +70.0$  ( $c$  = 0.10, MeOH for 96% ee).

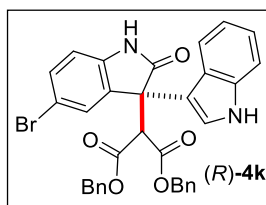

**Dibenzy (R)-2-(5-bromo-3-(1H-indol-3-yl)-2-oxoindolin-3-yl)malonate:** Compound (R)-**4k** was obtained as a yellow solid (0.08 mmol scale of reaction, 36 mg of product, 74% yield);  $R_f$  = 0.60 (40% EtOAc in hexane);  $^1\text{H NMR}$  (500 MHz, 0.5 mL  $\text{CDCl}_3$ , 0.1 mL  $\text{DMSO}-d_6$ )  $\delta$  9.66 - 9.64 (m, 2H), 7.99 - 7.96 (m, 1H), 7.79 - 7.74 (m, 1H), 7.29 - 7.16 (m, 5H), 7.13 - 7.01 (m, 4H), 6.99 - 6.88 (m, 3H), 6.71 - 6.67 (m, 2H), 6.62 - 6.58 (m, 1H), 6.54 - 6.51 (m, 1H), 5.23 - 5.20 (m, 1H), 4.84 - 4.82 (m, 2H), 4.74 - 4.72 (m,

2H), ;  $^{13}\text{C}$  NMR (125 MHz, DMSO)  $\delta$  177.6, 167.1, 166.6, 141.8, 137.2, 134.8, 134.7, 131.7, 131.4, 129.9, 128.4, 128.3, 128.1, 127.9, 127.8, 127.7, 127.6, 124.8, 124.5, 121.8, 121.7, 119.4, 114.0, 111.6, 111.4, 67.2, 66.9, 56.4, 53.7; **IR** (film)  $\nu_{\text{max}}$  3388, 3066, 2924, 2854, 2840, 1728, 1620, 1471, 1465, 1442, 1311, 1273, 1250, 1217, 1145, 750, 686  $\text{cm}^{-1}$ ; **HRMS** (ESI)  $m/z$   $[\text{M} + \text{Na}]^+$  Calcd for  $[\text{C}_{33}\text{H}_{25}\text{BrN}_2\text{O}_5 + \text{Na}]^+$  631.0839; Found 631.0839; **MP** 220 - 222  $^{\circ}\text{C}$ ; Enantiomeric excess of pure compound was determined *via* HPLC analysis using a Chiralpak OD-3 column; solvent: hexane/2-propanol = 60/40; flow rate: 1.0 mL/min; detection: at 254 nm):  $t_{\text{R}}$  minor = 6.18 min,  $t_{\text{R}}$  major = 13.88 min.  $[\alpha]_{\text{D}}^{25.0} = +120.0$  ( $c = 0.16$ ,  $\text{CHCl}_3$  for 94% ee).

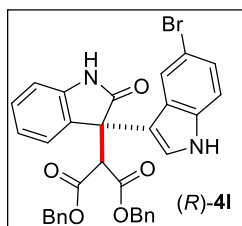

**Dibenzyl (R)-2-(3-(5-bromo-1H-indol-3-yl)-2-oxoindolin-3-yl)malonate:** Compound (*R*)-**4I** was obtained as a colorless solid (0.08 mmol scale of reaction, 38 mg of product, 80% yield);  $R_f = 0.55$  (50% EtOAc in hexane);  $^1\text{H}$  NMR (400 MHz, 0.5 mL  $\text{CDCl}_3$ , 0.1 mL  $\text{DMSO}-d_6$ )  $\delta$  9.85 (br, 1H), 9.41 (br, 1H), 7.98 (s, 1H), 7.83 - 7.81 (m, 1H), 7.1 - 7.08 (m, 9H), 6.95 - 6.91 (m, 3H), 6.7 - 6.73 (m, 3H), 6.5 - 6.53 (m, 1H), 5.16 (s, 1H), 4.81 - 4.72 (m, 4H);  $^{13}\text{C}$  NMR (125 MHz,  $\text{DMSO}-d_6$ )  $\delta$  178.1, 167.2, 166.7, 142.4, 142.4, 135.9, 134.8, 134.7, 129.2, 128.4, 128.3, 128.1, 127.9, 127.7, 126.9, 126.6, 126.1, 124.5, 124.3, 121.8, 113.2, 112.7, 111.5, 110.1, 67.2, 66.9, 56.5, 53.4; **IR** (film)  $\nu_{\text{max}}$  3391, 2925, 2257, 1728, 1621, 1471, 1379, 1312, 1266, 1147, 1025, 1005, 755, 698  $\text{cm}^{-1}$ ; **HRMS** (ESI)  $m/z$   $[\text{M} + \text{Na}]^+$  Calcd for  $[\text{C}_{33}\text{H}_{25}\text{BrN}_2\text{O}_5 + \text{Na}]^+$  631.0839; Found 631.0867; **MP** 110 - 112  $^{\circ}\text{C}$ ; Enantiomeric excess of pure compound was determined *via* HPLC analysis using a Chiralpak OD-3 column; solvent: hexane/2-propanol = 60/40; flow rate: 1.0 mL/min; detection: at 254 nm):  $t_{\text{R}}$  minor = 4.65 min,  $t_{\text{R}}$  major = 9.13 min.  $[\alpha]_{\text{D}}^{25.2} = +200.0$  ( $c = 0.18$ , MeOH for 92% ee).

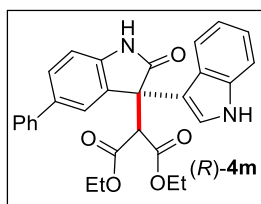

**Diethyl (R)-2-(3-(1H-indol-3-yl)-2-oxo-5-phenylindolin-3-yl)malonate:** Compound (*R*)-**4m** was obtained as a brown solid (0.08 mmol scale of reaction, 28 mg of product, 74% yield);  $R_f = 0.55$  (40% EtOAc in hexane);  $^1\text{H NMR}$  (500 MHz, 0.5 mL  $\text{CDCl}_3$ , 0.1 mL  $\text{DMSO}-d_6$ )  $\delta$  9.72 - 9.68 (m, 2H), 8.29 - 8.28 (m, 1H), 7.86 - 7.85 (m, 1H), 7.61 - 7.48 (m, 3H), 7.42 - 7.35 (m, 2H), 7.31 - 7.24 (m, 2H), 7.06 - 6.97 (m, 3H), 6.73 - 6.71 (m, 1H) 5.21 (s, 1H), 3.94 - 3.83 (m, 4H), 2.73 (Water), 0.92 - 0.87 (m, 3 H), 0.78 - 0.75 (m, 3H);  $^{13}\text{C NMR}$  (125 MHz, 0.5 mL  $\text{CDCl}_3$ , 0.1 mL  $\text{DMSO}-d_6$ )  $\delta$  178.6, 167.4, 167.0, 142.1, 141.1, 137.2, 134.7, 130.6, 128.6, 127.2, 126.6, 126.5, 125.5, 125.1, 124.4, 121.9, 121.5, 119.1, 111.5, 110.0, 61.4, 60.8, 56.6, 53.7, 13.4, 13.2; **IR** (film)  $\nu_{\text{max}}$  3394, 3062, 2926, 2357, 1720, 1624, 1473, 1307, 1236, 827, 746  $\text{cm}^{-1}$ ; **HRMS** (ESI)  $m/z$   $[\text{M} + \text{H}]^+$  Calcd for  $[\text{C}_{29}\text{H}_{27}\text{N}_2\text{O}_5]^+$  483.1914; Found 483.1906; **MP** 180 - 182  $^\circ\text{C}$ ; Enantiomeric excess of pure compound was determined *via* HPLC analysis using a Chiralpak OD-3 column; solvent: hexane/2-propanol = 50/50; flow rate: 1.0 mL/min; detection: at 254 nm):  $t_R$  minor = 6.56 min,  $t_R$  major = 8.17 min.  $[\alpha]_D^{24.2} = +109.0$  ( $c = 0.21$ , MeOH for 91% ee).

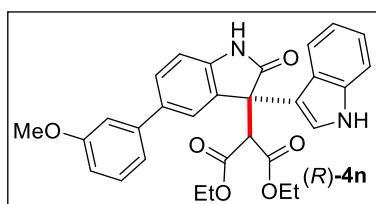

**Diethyl (R)-2-(3-(1H-indol-3-yl)-5-(3-methoxyphenyl)-2-oxoindolin-3-yl)malonate:** Compound (*R*)-**4n** was obtained as a colorless solid (0.08 mmol scale of reaction, 31 mg of product, 77% yield);  $R_f = 0.56$  (40% EtOAc in hexane);  $^1\text{H NMR}$  (400 MHz, 0.5 mL  $\text{CDCl}_3$ , 0.1 mL  $\text{DMSO}-d_6$ )  $\delta$  9.72 (brs, 1H), 9.68 (brs, 1H), 8.08 (s, 1H), 7.65 (d,  $J = 8.1$  Hz, 1H), 7.33 (d,  $J = 7.6$  Hz, 1H), 7.16 - 7.08 (m, 2H), 6.701 - 6.99 (m, 1H), 6.94 (s, 1H), 6.89 - 6.86 (m, 1H) 6.82 - 6.80 (m, 2H), 6.67 - 6.65 (m, 1H), 6.55 (s, 1H), 5.00 (s, 1H), 3.75 - 3.67 (m, 7H), 2.65 (Water), 0.75 - 0.72 (m, 3H), 0.61 - 0.57(m, 3H);  $^{13}\text{C NMR}$

(100 MHz, 0.5 mL CDCl<sub>3</sub>, 0.1 mL DMSO-D<sub>6</sub>)  $\delta$  178.5, 167.3, 166.9, 159.8, 142.6, 142.4, 137.2, 130.4, 130.6, 129.6, 127.2, 125.8, 120.5, 124.4, 121.9, 121.4, 119.2, 118.9, 112.5, 111.8, 111.7, 111.4, 109.9, 61.3, 60.7, 56.6, 55.2, 53.7, 13.4, 13.3; **IR** (film)  $\nu_{\max}$  3415, 2924, 2852, 1726, 1622, 1481, 1307, 1174, 1029, 848, 748 cm<sup>-1</sup>; **HRMS** (ESI)  $m/z$  [M + H]<sup>+</sup> Calcd for [C<sub>30</sub>H<sub>29</sub>N<sub>2</sub>O<sub>6</sub>]<sup>+</sup> 513.2020; Found 513.2022; 513.2020; **MP** 270 - 272 °C; Enantiomeric excess of pure compound was determined *via* HPLC analysis using a Chiralpak ID-3 column; solvent: hexane/2-propanol = 50/50; flow rate: 1.0 mL/min; detection: at 254 nm):  $t_R$  minor = 5.05 min,  $t_R$  major = 6.26 min.  $[\alpha]_D^{24.2} = +250.0$  ( $c = 0.10$ , CHCl<sub>3</sub> for 88% ee).

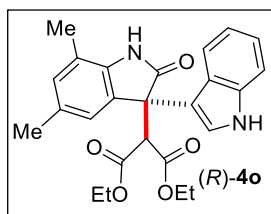

**Diethyl (R)-2-(3-(1H-indol-3-yl)-5,7-dimethyl-2-oxoindolin-3-yl)malonate:** Compound (*R*)-**4o** was obtained as a colorless solid (0.08 mmol scale of reaction, 27 mg of product, 79% yield);  $R_f = 0.56$  (40% EtOAc in hexane); **<sup>1</sup>H NMR** (500 MHz, 0.5 mL CDCl<sub>3</sub>, 0.1 mL DMSO-D<sub>6</sub>)  $\delta$  9.47 - 9.45 (m, 2H), 7.74 - 7.72 (m, 1H), 7.48 (s, 1H), 7.12 - 7.08 (m, 1H), 6.93-6.84 (m, 2H), 6.75 - 6.74 (m, 1H), 6.51 - 6.50 (m, 1H), 5.01 (s, 1H), 3.77 - 3.67 (m, 4H), 2.56 (Water), 2.17 (s, 3H), 2.02 (s, 3H); **<sup>13</sup>C NMR** (125 MHz, 0.5 mL CDCl<sub>3</sub>, 0.1 mL DMSO-D<sub>6</sub>)  $\delta$  179.1, 167.4, 167.1, 138.5, 137.1, 130.8, 130.3, 129.5, 125.1, 125.0, 124.5, 122.2, 121.4, 118.6, 112.3, 111.3, 61.2, 60.7, 56.5, 54.0, 21.2, 16.5, 13.2 (2c); **IR** (film)  $\nu_{\max}$  3444, 3386, 2920, 2848, 1707, 1624, 1456, 1261, 1103, 744 cm<sup>-1</sup>; **HRMS** (ESI)  $m/z$  [M + H]<sup>+</sup> Calcd for [C<sub>30</sub>H<sub>29</sub>N<sub>2</sub>O<sub>6</sub>]<sup>+</sup> 457.1734; Found 457.1749; **MP** 190 - 192 °C; Enantiomeric excess of pure compound was determined *via* HPLC analysis using a Chiralpak ID-3 column; solvent: hexane/2-propanol = 70/30; flow rate: 1.0 mL/min; detection: at 254 nm):  $t_R$  minor = 7.09 min,  $t_R$  major = 10.79 min.  $[\alpha]_D^{24.5} = +45.2$  ( $c = 0.30$ , MeOH for 90% ee).

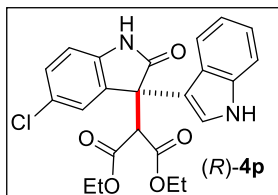

**Diethyl (R)-2-(5-chloro-3-(1H-indol-3-yl)-2-oxoindolin-3-yl)malonate:** Compound (*R*)-**4p** was obtained as a brown solid (0.08 mmol scale of reaction, 25 mg of product, 70% yield);  $R_f = 0.55$  (40% EtOAc in hexane);  $^1\text{H NMR}$  (400 MHz,  $\text{CDCl}_3$ )  $\delta$  8.33 (s, 1H), 8.09 (d,  $J = 2.6$  Hz, 1H), 8.05 (d,  $J = 2.2$  Hz, 1H), 7.87 (d,  $J = 8.0$  Hz, 1H), 7.25 (d,  $J = 3.6$  Hz, 1H), 7.24 – 7.23 (m, 1H), 7.15 – 7.05 (m, 2H), 6.76 (d,  $J = 8.3$  Hz, 1H), 6.62 (d,  $J = 2.7$  Hz, 1H), 5.19 (s, 1H), 4.00 – 3.84 (m, 4H), 0.90 (t,  $J = 7.1$  Hz, 3H), 0.77 (t,  $J = 7.1$  Hz, 3H);  $^{13}\text{C NMR}$  (100 MHz,  $\text{CDCl}_3$ )  $\delta$  178.3, 167.3, 166.8, 140.4, 137.0, 131.5, 128.8, 127.8, 127.7, 124.8, 124.1, 122.4, 122.1, 119.9, 111.9, 111.4, 110.8, 61.9, 61.2, 56.4, 53.9, 13.5, 13.3; **IR** (film)  $\nu_{\text{max}}$  3389, 2990, 1721, 1620, 1461, 1381, 1289, 1256, 1159, 1011, 870, 800, 761, 720  $\text{cm}^{-1}$ ; **HRMS** (ESI)  $m/z$   $[\text{M} + \text{Na}]^+$  Calcd for  $[\text{C}_{23}\text{H}_{22}\text{ClN}_2\text{O}_5]^+$  441.1212; Found 441.1236; **MP** 192 – 194  $^\circ\text{C}$ ; Enantiomeric excess of pure compound was determined *via* HPLC analysis using a Chiralpak OD-3 column; solvent: hexane/2-propanol = 70/30; flow rate: 1.0 mL/min; detection: at 254 nm):  $t_R$  minor = 5.10 min,  $t_R$  major = 7.48 min.  $[\alpha]_D^{24.5} = +201.8$  ( $c = 0.10$ , MeOH for 86% ee).

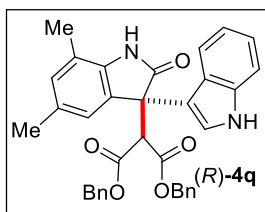

**Dibenzyl (R)-2-(3-(1H-indol-3-yl)-5,7-dimethyl-2-oxoindolin-3-yl)malonate:** Compound (*R*)-**4q** was obtained as a colourless solid (0.08 mmol scale of reaction, 34 mg of product, 78% yield);  $R_f = 0.61$  (40% EtOAc in hexane);  $^1\text{H NMR}$  (400 MHz,  $\text{DMSO}-d_6$ )  $\delta$  10.11 (s, 1H), 9.51 (s, 1H), 6.80 (d,  $J = 8.2$  Hz, 1H), 6.51 – 6.30 (m, 8H), 6.23 – 6.18 (m, 3H), 6.08 – 5.97 (m, 4H), 5.77 (s, 1H), 4.29 (s, 1H), 4.12 – 4.01 (m, 4H), 1.31 (s, 3H), 1.28 (s, 3H);  $^{13}\text{C NMR}$  (100 MHz,  $\text{DMSO}-d_6$ )  $\delta$  182.9, 172.1, 171.7, 144.1, 143.8, 142.2, 140.3, 140.2, 135.5, 134.9, 134.5, 133.5, 133.4, 133.2, 132.9, 132.7, 132.6, 130.0, 129.9, 126.7, 126.3, 123.8, 123.6, 116.9, 116.7, 71.8, 71.5, 61.5, 58.4, 26.1, 21.7; **IR**

(film)  $\nu_{\max}$  3385, 3064, 2924, 2854, 1718, 1612, 1471, 1465, 1311, 1273, 1217, 1155, 742, 696  $\text{cm}^{-1}$ ; **HRMS** (ESI)  $m/z$   $[M + Na]^+$  Calcd for  $[C_{35}H_{30}N_2O_5+Na]^+$  581.2047; Found 581.2064; **MP** 201 - 203  $^{\circ}\text{C}$ ; Enantiomeric excess of pure compound was determined *via* HPLC analysis using a Chiralpak AD-H column; solvent: hexane/2-propanol = 50/50; flow rate: 1.0 mL/min; detection: at 254 nm):  $t_R$  minor = 29.05 min,  $t_R$  major = 35.36 min.  $[\alpha]_D^{25.0} = +45.9$  ( $c = 0.40$ , MeOH for 93% ee).

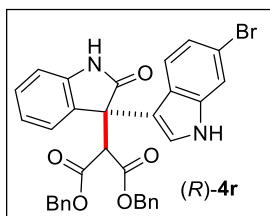

**Dibenzy (R)-2-(3-(6-bromo-1H-indol-3-yl)-2-oxoindolin-3-yl)malonate:** Compound (*R*)-**4r** was obtained as a yellow solid (0.08 mmol scale of reaction, 23 mg of product, 92% yield;  $R_f = 0.60$  (40% EtOAc in hexane);  $^1\text{H}$  NMR (400 MHz, DMSO- $\text{D}_6$ )  $\delta$  11.14 (s, 1H), 10.53 (s, 1H), 7.73 (d,  $J = 7.6$  Hz, 1H), 7.64 (d,  $J = 8.7$  Hz, 1H), 7.55 (s, 1H), 7.37 - 7.30 (m, 2H), 7.29 - 7.28 (m, 2H), 7.22 (d,  $J = 7.1$  Hz, 1H), 7.16 (t,  $J = 7.4$  Hz, 2H), 7.06 - 6.98 (m, 4H), 6.88 (d,  $J = 7.8$  Hz, 1H), 6.77 (d,  $J = 7.4$  Hz, 2H), 6.67 (s, 1H), 5.12 (s, 1H), 5.00 - 4.80 (m, 4H);  $^{13}\text{C}$  NMR (100 MHz, DMSO- $\text{D}_6$ )  $\delta$  177.7, 167.3, 166.7, 143.3, 138.4, 135.5, 135.5, 129.7, 129.2, 128.8, 128.6, 128.5, 128.3, 127.9, 127.8, 126.9, 126.2, 124.2, 123.7, 122.1, 121.8, 114.9, 114.6, 112.1, 110.3, 67.1, 66.8, 56.5, 53.2; **IR** (film)  $\nu_{\max}$  3455, 3364, 2994, 2830, 1717, 1622, 1491, 1409, 1301, 1221, 1210, 1100, 772, 636  $\text{cm}^{-1}$ ; **HRMS** (ESI)  $m/z$   $[M + Na]^+$  Calcd for  $[C_{33}H_{25}BrN_2O_5+Na]^+$  631.0835; Found 631.0839; **MP** 195 - 197  $^{\circ}\text{C}$ ; Enantiomeric excess of pure compound was determined *via* HPLC analysis using a Chiralpak ID-3 column; solvent: hexane/2-propanol = 60/40; flow rate: 1.0 mL/min; detection: at 254 nm):  $t_R$  minor = 7.18 min,  $t_R$  major = 10.29 min.  $[\alpha]_D^{22.2} = +95.9$  ( $c = 0.18$ ,  $\text{CH}_2\text{Cl}_2$  for 98% ee).

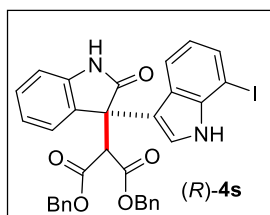

**Dibenzy (R)-2-(3-(7-iodo-1H-indol-3-yl)-2-oxoindolin-3-yl)malonate:** Compound (R)-**4s** was obtained as a yellow solid (0.08 mmol scale of reaction, 44 mg of product, 85% yield);  $R_f$  = 0.63 (40% EtOAc in hexane);  $^1\text{H NMR}$  (400 MHz, DMSO- $\text{D}_6$ )  $\delta$  8.0 (s, 1H), 7.9 (d,  $J$  = 7.6 Hz, 1H), 7.9 (s, 1H), 7.8 (d,  $J$  = 8.2 Hz, 1H), 7.5 (d,  $J$  = 7.5 Hz, 1H), 7.25 – 7.14 (m, 7H), 7.06 – 7.00 (m, 3H), 6.84 – 6.78 (m, 3H), 6.69 (d,  $J$  = 7.7 Hz, 1H), 6.64 (d,  $J$  = 2.7 Hz, 1H), 5.27 (s, 1H), 4.95 – 4.86 (m, 4H);  $^{13}\text{C NMR}$  (100 MHz, DMSO- $\text{D}_6$ )  $\delta$  177.9, 167.1, 166.6, 141.5, 138.4, 134.9, 134.6, 131.0, 129.0, 128.9, 128.4, 128.3, 128.2, 128.2, 128.1, 128.0, 127.3, 125.1, 124.6, 122.5, 122.3, 121.7, 114.1, 110.0, 76.9, 67.4, 67.1, 56.5, 53.6; **IR** (film)  $\nu_{\text{max}}$  3443, 3364, 2994, 2804, 1719, 1622, 1441, 1400, 1301, 1290, 1200, 1105, 792, 606  $\text{cm}^{-1}$ ; **HRMS** (ESI)  $m/z$   $[\text{M} + \text{H}]^+$  Calcd for  $[\text{C}_{33}\text{H}_{26}\text{IN}_2\text{O}_5]^+$  657.0881; Found 657.0853; **MP** 150 - 152  $^{\circ}\text{C}$ ; Enantiomeric excess of pure compound was determined *via* HPLC analysis using a Chiralpak IC-3 column; solvent: hexane/2-propanol = 50/50; flow rate: 1.0 mL/min; detection: at 254 nm):  $t_R$  minor = 4.93 min,  $t_R$  major = 6.44 min.  $[\alpha]_D^{20.6}$  = +243.2 ( $c$  = 0.15,  $\text{CH}_2\text{Cl}_2$  for 90% ee).

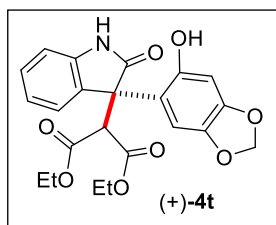

**(+)-Diethyl 2-(3-(6-hydroxybenzo[d][1,3]dioxol-5-yl)-2-oxoindolin-3-yl)malonate:** Compound (+)-**4t** was obtained as a colourless solid (0.08 mmol scale of reaction, 31 mg of product, 90% yield);  $R_f$  = 0.52 (40% EtOAc in hexane);  $^1\text{H NMR}$  (400 MHz, Chloroform- $d$ )  $\delta$  9.90 (s, 1H), 8.74 (s, 1H), 8.01 (d,  $J$  = 7.2 Hz, 1H), 7.30 (td,  $J$  = 7.7, 1.3 Hz, 1H), 7.16 (td,  $J$  = 7.7, 1.2 Hz, 1H), 6.93 (d,  $J$  = 7.7 Hz, 1H), 6.51 (s, 1H), 6.32 (s, 1H), 5.80 (dd,  $J$  = 20.8, 1.5 Hz, 2H), 5.33 (s, 1H), 4.06 (q,  $J$  = 7.1 Hz, 2H), 3.82 (qd,  $J$  = 7.1, 4.7 Hz, 2H), 1.09 (t,  $J$  = 7.1 Hz, 3H), 0.85 (t,  $J$  = 7.1 Hz, 3H);  $^{13}\text{C NMR}$  (101 MHz,



Chloroform-*d*)  $\delta$  182.0, 167.2, 166.6, 152.4, 148.5, 141.6, 140.7, 129.5, 128.3, 123.5, 113.6, 110.7, 108.7, 101.9, 101.3, 61.8, 61.5, 57.8, 54.4, 13.3, 13.4; **IR** (film)  $\nu_{\max}$  3355, 3264, 2920, 2884, 1719, 1622, 1451, 1465, 1311, 1273, 1217, 1155, 742, 696  $\text{cm}^{-1}$ ; **HRMS** (ESI)  $m/z$   $[M + H]^+$  Calcd for  $[\text{C}_{22}\text{H}_{22}\text{NO}_8]^+$  428.1340; Found 428.1331; **MP** 135 - 137  $^{\circ}\text{C}$ ; Enantiomeric excess of pure compound was determined *via* HPLC analysis using a Chiralpak AD-H column; solvent: hexane/2-propanol = 50/50; flow rate: 1.0 mL/min; detection: at 254 nm):  $t_R$  minor = 7.17 min,  $t_R$  major = 24.25 min.  $[\alpha]_D^{23.1} = +34.2$  ( $c = 0.16$ , MeOH for 50% ee).

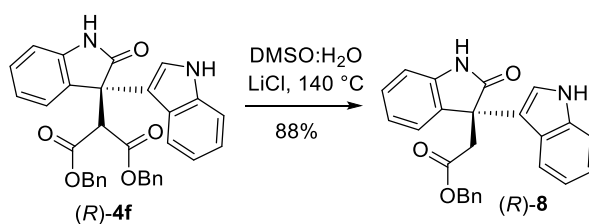

**Synthetic procedure for the synthesis of compound (R)-8:** To a stirred solution of (R)-4f (300 mg, 0.6 mmol; 1.0 equiv) in DMSO (5 mL) at 25  $^{\circ}\text{C}$  was added lithium chloride (96 mg, 2.3 mmol, 4.0 equiv) and  $\text{H}_2\text{O}$  (104  $\mu\text{L}$ , 5.6 mmol, 10.0 equiv). After 5 minutes stirring, the reaction mixture was transferred to a pre-heated oil bath (140  $^{\circ}\text{C}$ ) and stirring was continued for 24 h. After complete consumption of starting material (as judged by running TLC), reaction mixture was cooled down to 25  $^{\circ}\text{C}$  and quenched with water (4 mL). The organic compound was extracted with ethyl acetate (2 X 10 mL). Then the combined organic layers were dried over anhydrous sodium sulphate and concentrated under reduced pressure. The crude material was purified by column chromatography by using 20 - 30 % (EtOAc/Hexane) to afford compound (R)-8 as a colorless solid.

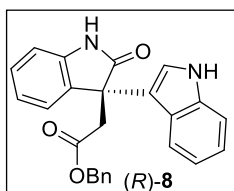

**Benzyl (R)-2-(3-(1H-indol-3-yl)-2-oxoindolin-3-yl)acetate:** Compound (R)-8 was obtained as a yellow solid (0.6 mmol scale of reaction, 195 mg of product, 80% yield);  $R_f = 0.45$  (40% EtOAc in hexane);  $^1\text{H NMR}$  (400 MHz,  $\text{DMSO}-d_6$ )  $\delta$  11.08 (s, 1H), 10.56

(s, 1H), 7.35 - 7.21 (m, 10H), 7.18 - 7.11 (m, 3H), 7.03 - 6.99 (m, 2H), 6.95 - 6.90 (m, 2H), 6.80 (t,  $J = 7.5$  Hz, 1H), 4.92 (s, 3H), 3.63 (d,  $J = 16.0$  Hz, 1H), 3.51 (d,  $J = 16.1$  Hz, 2H), 3.44 (Water);  $^{13}\text{C}$  NMR (100 MHz, DMSO- $d_6$ )  $\delta$  179.4, 169.9, 143.3, 137.2, 136.3, 133.1, 128.8, 128.6, 128.3, 128.1, 125.1, 124.4, 124.0, 121.8, 121.6, 119.8, 119.1, 114.2, 112.1, 109.9, 65.9, 49.8; **IR** (film)  $\nu_{\text{max}}$  3415, 3310, 2929, 2802, 1728, 1642, 1619, 1480, 1327, 1154, 1059, 878, 760  $\text{cm}^{-1}$ ; **HRMS** (ESI)  $m/z$   $[\text{M} + \text{Na}]^+$  Calcd for  $[\text{C}_{25}\text{H}_{20}\text{N}_2\text{O}_3 + \text{Na}]^+$  419.1366; Found 419.1380; **MP** 165 - 167  $^{\circ}\text{C}$ ; Enantiomeric excess of pure compound was determined *via* HPLC analysis using a Chiralpak OD-3 column; solvent: hexane/2-propanol = 50/50; flow rate: 1.0 mL/min; detection: at 254 nm):  $t_{\text{R}}$  minor = 5.71 min,  $t_{\text{R}}$  major = 13.53 min.  $[\alpha]_{\text{D}}^{21.0} = +122.0$  ( $c = 0.24$ , MeOH for 99% ee).

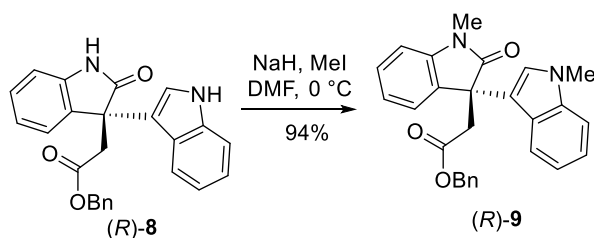

**Synthetic procedure for compound (R)-9:** Compound (R)-8 (200 mg, 0.5 mmol; 1.0 equiv) was taken in dimethyl sulfoxide (3 mL) under nitrogen atmosphere. The reaction mixture was cooled to 0  $^{\circ}\text{C}$  and potassium *tert*-butoxide (119 mg, 1.1 mmol, 2.2 equiv) was added to it. After 5 min of stirring, methyl iodide (66  $\mu\text{L}$ , 1.1 mmol, 2.2 equiv) was added at same temperature and stirring was continued for 3 h. Upon completion of starting material (as judged by running TLC), the reaction mixture was quenched with careful addition of water (2 mL) and organic compound was extracted with ethyl acetate (2 X 10 mL). The combined organic layers were dried over anhydrous sodium sulphate and concentrated under reduced pressure. The crude material was purified by column chromatography by using 20-30 % (EtOAc/Hexane) to afford compound (R)-9 as a white solid.

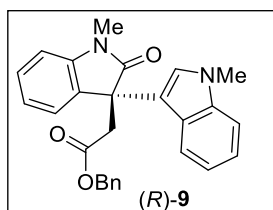

**Benzyl (R)-2-(1-methyl-3-(1-methyl-1H-indol-3-yl)-2-oxoindolin-3-yl)acetate:**

Compound (*R*)-**9** was obtained as a brown solid (0.5 mmol scale of reaction, 191 mg of product, 94% yield);  $R_f = 0.53$  (40% EtOAc in hexane);  $^1\text{H NMR}$  (400 MHz,  $\text{CDCl}_3$ ) 7.30 - 7.28 (m, 3H), 7.09 - 7.04 (m, 6H), 6.85 - 6.81 (m, 2H), 6.52 (d,  $J = 7.8$  Hz, 1H), 6.47 (d,  $J = 7.8$  Hz, 1H), 4.89 - 4.81 (m, 2H), 4.37 (d,  $J = 16.7$  Hz, 1H), 3.80 (s, 1H), 3.42 (d,  $J = 16.8$  Hz, 1H), 3.13 (s, 3H), 3.05 (s, 3H);  $^{13}\text{C NMR}$  (125 MHz)  $\delta$  177.8, 169.6, 144.4, 137.7, 135.3, 131.4, 128.6, 128.5, 128.4, 127.1, 125.5, 123.9, 122.4, 121.9, 120.8, 119.5, 112.9, 109.5, 108.3, 66.5, 49.7, 40.9, 32.7, 26.3; **IR** (film)  $\nu_{\text{max}}$  3415, 2924, 2852, 1726, 1622, 1481, 1307, 1174, 1029, 848, 748  $\text{cm}^{-1}$ ; **HRMS** (ESI)  $m/z$   $[\text{M} + \text{H}]^+$  Calcd for  $[\text{C}_{27}\text{H}_{25}\text{N}_2\text{O}_3]^+$  425.1860; Found 425.1883; **MP** 68 - 70  $^\circ\text{C}$ ; Enantiomeric excess of pure compound was determined *via* HPLC analysis using a Chiralpak OD-3 column; solvent: hexane/2-propanol = 50/50; flow rate: 1.0 mL/min; detection: at 254 nm):  $t_R$  minor = 7.82 min,  $t_R$  major = 13.17 min.  $[\alpha]_D^{24.1} = +12.5$  ( $c = 0.19$ ,  $\text{CHCl}_3$  for 99.5% ee).

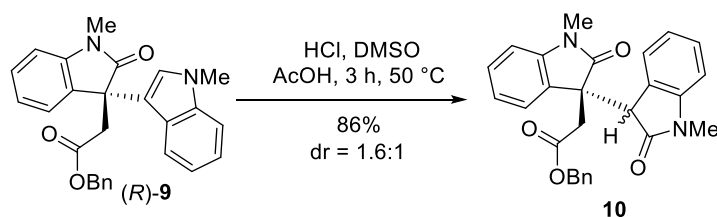

**Synthetic procedure for compound 10:** Compound (*R*)-**9** (150 mg, 0.33 mmol; 1.0 equiv) was taken in acetic acid (3 mL) at 25  $^\circ\text{C}$ . To this solution was added HCl (61  $\mu\text{L}$ , 1.7 mmol, 5.0 equiv), followed by dimethyl sulfoxide (236  $\mu\text{L}$ , 3.3 mmol, 10.0 equiv). Then the reaction mixture was placed over a pre-heated oil bath maintaining 50  $^\circ\text{C}$  for 3 h. Upon completion of starting material (as judged by running TLC), the reaction mixture was quenched with sat.  $\text{Na}_2\text{CO}_3$  (2 mL) and organic compound was extracted with ethyl acetate (2 X 10 mL). The combined organic layers were dried over anhydrous sodium sulphate and concentrated under reduced pressure. The crude material was purified by

column chromatography by using 20-30% (EtOAc/Hexane) to afford compound **10** as an orange solid.

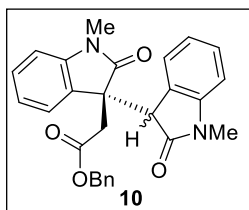

**Benzyl 2-((3'R)-1,1'-dimethyl-2,2'-dioxo-[3,3'-biindolin]-3'-yl)acetate (10):**

Compound **10** (major diastereomer) was obtained as a orange colour gel (0.3 mmol scale of reaction, 85 mg of product, 50% yield);  $R_f = 0.44$  (40% EtOAc in hexane);  $^1\text{H NMR}$  (400 MHz,  $\text{CDCl}_3$ )  $\delta$  7.29 - 7.29 (m, 3H), 7.10 - 7.05 (m, 6H), 6.84 (td,  $J = 7.6, 1.4$  Hz, 1H), 6.52 (d,  $J = 7.8$  Hz, 1H), 6.47 (d,  $J = 7.8$  Hz, 1H), 4.89 - 4.81 (m 2H), 4.37 (dd,  $J = 16.8, 1.3$  Hz, 1H), 3.80 (s, 1H), 3.44 - 3.39 (m, 1H), 3.13 (d,  $J = 1.4$  Hz, 1H), 3.13 (s, 3H), 3.05 (s, 3H);  $^{13}\text{C NMR}$  (100 MHz,  $\text{CDCl}_3$ )  $\delta$  177.3, 174.7, 169.7, 144.0, 143.9, 135.3, 128.7, 128.6, 128.4, 128.1, 128.1, 126.8, 124.3, 123.6, 122.4, 122.1, 121.9, 107.9, 107.6, 66.3, 51.3, 49.6, 37.5, 25.9, 25.8; **IR** (film)  $\nu_{\text{max}}$  3425, 2914, 2862, 1721, 1612, 1482, 1317, 1124, 1009, 808, 758  $\text{cm}^{-1}$ ; **HRMS** (ESI)  $m/z$   $[\text{M} + \text{H}]^+$  Calcd for  $[\text{C}_{27}\text{H}_{25}\text{N}_2\text{O}_4]^+$  441.1809; Found 441.1810

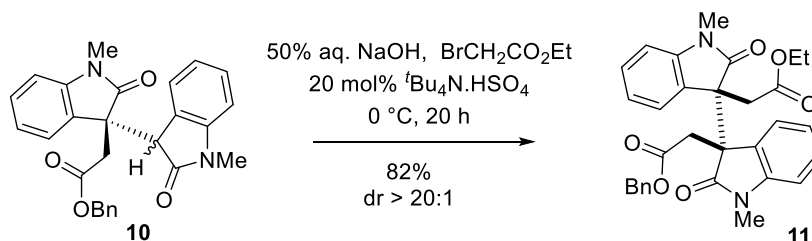

**Synthetic procedure for compound 11:** Compound **10** (100 mg, 0.2 mmol; 1.0 equiv) was taken in toluene (2 mL) under nitrogen atmosphere at 0 °C. To this solution was added tetrabutyl ammonium hydrogen sulphate (16 mg, 0.05 mmol, 20 mol%), followed by 50% aq. sodium hydroxide (742  $\mu\text{L}$ , 9.28 mmol, 40 equiv). After 5 minutes of stirring at 0 °C, bromoethyl acetate (53  $\mu\text{L}$ , 0.5 mmol, 2.0 equiv) was added to the reaction mixture. Then the reaction mixture allowed stirring for 20 h at the same temperature. Upon completion of starting material (monitored by running TLC), the reaction mixture

was diluted with water (2 mL) and organic compound was extracted with ethyl acetate (2 X 10 mL). Then the organic layer was dried with anhydrous sodium sulphate and concentrated in *vacuo*. The crude material was purified by column chromatography by using 20-30% (EtOAc/Hexane) to afford compound **11** as an orange solid.

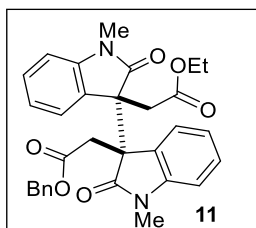

**Benzyl 2-(3'-(2-ethoxy-2-oxoethyl)-1,1'-dimethyl-2,2'-dioxo-[3,3'-biindolin]-3-yl)acetate:** Compound **11** was obtained as a colourless solid (0.22 mmol scale of reaction, 98 mg of product, 85% yield);  $R_f = 0.53$  (40% EtOAc in hexane);  $^1\text{H NMR}$  (700 MHz)  $\delta$  7.19 - 7.17 (m, 3H), 6.96 - 6.91 (m, 2H), 6.31 - 6.29 (m, 1H), 6.20 - 6.19 (m, 1H), 4.68 - 4.62 (m, 2H), 4.02 (d,  $J = 16.0$  Hz, 1H), 3.95 (d,  $J = 16.0$  Hz, 1H), 3.73 - 3.64 (m, 2H) 3.18 (d,  $J = 16.0$  Hz, 1H), 3.11 (d,  $J = 16.0$  Hz, 1H), 3.00 (s, 3H), 0.83 (d,  $J = 7.11$  Hz, 3H);  $^{13}\text{C NMR}$  (175 MHz)  $\delta$  176.6, 176.4, 169.7, 169.6, 143.8, 143.7, 135.2, 128.8, 128.7, 128.4, 128.3, 128.2, 126.8, 126.7, 122.8, 121.5, 121.4, 107.5, 107.3, 77.2, 77.1, 76.8, 66.4, 60.4, 52.5, 52.4, 33.9 (2C), 25.8, 25.5, 13.7; **IR** (film)  $\nu_{\text{max}}$  3446, 3435, 2956, 2922, 2850, 2350, 2090, 1735, 1712, 1612, 1494, 1456, 1338, 1188, 1118, 1095, 906, 754  $\text{cm}^{-1}$ ; **HRMS** (ESI)  $m/z$   $[\text{M} + \text{H}]^+$  Calcd for  $[\text{C}_{23}\text{H}_{21}\text{N}_2\text{O}_6]^+$  549.1996; Found 549.2013; **MP** 135 - 137  $^{\circ}\text{C}$ .

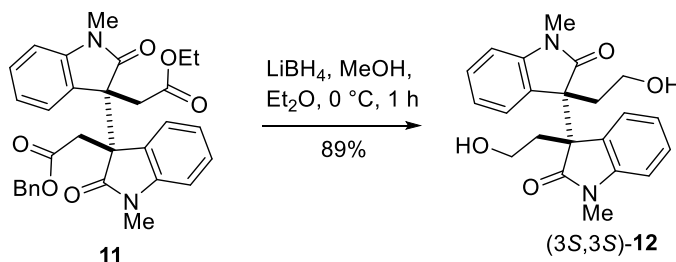

**Synthetic procedure for the synthesis of compound (3S,3S)-12:** Compound **11** (50 mg, 0.1 mmol; 1.0 equiv) was taken in diethyl ether (2 mL) under nitrogen atmosphere at 0  $^{\circ}\text{C}$ . To this solution was added  $\text{LiBH}_4$  (225  $\mu\text{L}$ , 0.45 mmol, 5.0 equiv) followed by

methanol (44  $\mu$ L, 0.9 mmol, 10.0 equiv). Then the reaction mixture allowed stirring for 1 h at the same temperature. Upon completion of starting material (monitored by running TLC), the reaction mixture was quenched with water (2 mL) and organic compound was extracted with ethyl acetate (2 X 5 mL). Then the organic layer was dried with anhydrous sodium sulphate and concentrated in *vacuo*. The crude material was purified by column chromatography by using 80 - 90% (EtOAc/Hexane) to afford compound (S,S)-**12** as a white crystalline solid.

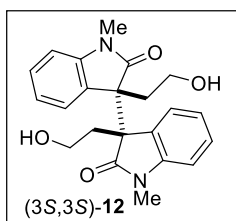

**(3S,3S)-Bis(2-hydroxyethyl)-1,1'-dimethyl-[3,3'-biindoline]-2,2'-dione:** Compound (3S, 3'S)-**12** was obtained as a colourless solid (0.1 mmol scale of reaction, 33 mg of product, 88% yield);  $R_f$  = 0.20 (in EtOAc);  $^1\text{H-NMR}$  (400 MHz,  $\text{CDCl}_3$ )  $\delta$  7.03-6.99 (m, 4H), 6.81 (t,  $J$  = 7.5 Hz, 2H), 6.39 (d,  $J$  = 7.7 Hz, 2H), 3.42-3.36 (m, 2H), 3.22-3.17 (m, 2H), 3.13-3.06 (m, 2H), 3.03 (s, 6H), 2.63-2.55 (m, 2H);  $^{13}\text{C NMR}$  (175 MHz)  $\delta$  178.1, 143.4, 128.4, 127.2, 123.5, 121.5, 107.5, 59.7.8, 54.9, 31.4, 25.7; Enantiomeric excess of pure compound was determined *via* HPLC analysis using a Chiralpak AD-3 column; solvent: 2-propanol /hexane= 30/80; flow rate: 1.0 mL/min; detection: at 254 nm):  $t_R$  major = 16.66 min.  $t_R$  minor = 20.41 min.  $[\alpha]_D^{23.0} = -145.2$  ( $c$  = 0.4,  $\text{CHCl}_3$  for 99.5% ee).

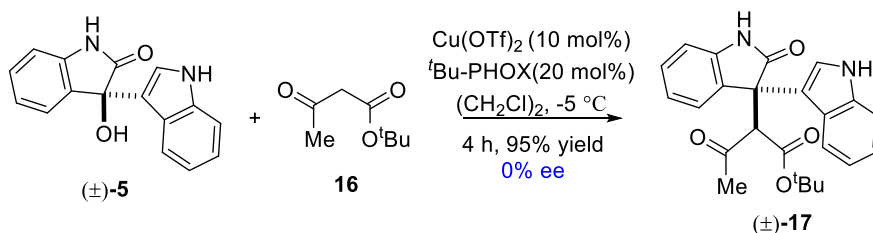

**Synthesis of compound (±)-17 from enantioselective method:** An oven dried sample vial was charged with  $\text{Cu(OTf)}_2$  (0.1 equiv) and  $t\text{Bu-PHOX}$  (0.2 equiv) in dichloromethane (4 mL) at 25  $^\circ\text{C}$  under nitrogen atmosphere. The reaction mixture was stirred for 30 minutes to make the complex. After that the reaction vessel was cooled to -

5 °C and *tert*-Butyl acetoacetate (3.0 equiv) was added to the mixture and stirring was continued for 15 minutes maintaining temperature -5 °C. Then, a solution of 3-hydroxy 2-oxindole in dichloromethane (0.5 mL) was added slowly to the reaction mixture. Then the reaction mixture was allowed to stir for 4 h at -5 °C. After complete consumption of starting material (as judged by running TLC), the crude mixture was concentrated under reduced pressure and purified by column chromatography by using 20-30% EtOAc-hexane mixture as eluent to afford the desired compound.

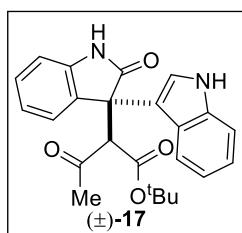

***tert*-Butyl-2-(3-(1*H*-indol-3-yl)-2-oxoindolin-3-yl)-3-oxobutanoate:** Compound (±)-**17** was obtained as a colourless solid (0.08 mmol scale of reaction, 31 mg of product, 95% yield); dr = 1.1:1 (determined from un purified reaction mixture] of (±)-**17**;  $R_f$  = 0.51 (40% EtOAc in hexane);  $^1\text{H NMR}$  (400 MHz,  $\text{CDCl}_3$ , spectrum contains ~1.1:1 diastereomers)  $\delta$  8.57 (d,  $J$  = 9.4, 1H for minor diastereomer), 8.44 (d,  $J$  = 8.7, 1H for major diastereomer), 8.20 – 8.17 (m, 2H for major + minor diastereomers), 8.06 - 8.02 (m, 2H for major + minor diastereomers), 7.93 (d,  $J$  = 7.5, 1H for major diastereomer), 7.85 (d,  $J$  = 7.5, 1H for minor diastereomer), 7.25 - 7.16 (m, 4H), 7.16 - 6.99 (m, 6H for major + minor diastereomers), 6.81 - 6.76 (m, 2H for major + minor diastereomers), 6.52 (s, 1H for minor diastereomer), 6.41 (s, 1H for major diastereomer), 5.43 (s, 1H for major diastereomer), 5.07 (s, 1H for minor diastereomer), 2.08 - 2.04 (m, 7H for major + minor diastereomers), 1.04 - 1.02 (m, 9H for major diastereomer), 0.99 (s, 9H for minor diastereomer)  $^{13}\text{C NMR}$  (100 MHz,  $\text{CDCl}_3$ , spectrum contains ~1.1:1 diastereomers)  $\delta$  202.5, 201.5, 179.4, 178.9, 168.1, 166.7, 141.8, 141.5, 137.2, 137.1, 130.4, 130.1, 128.5, 128.4, 128.0, 126.5, 125.4 (two carbons), 124.9, 124.4, 122.6 (two carbons), 122.4, 122.1 (two carbons), 122.1, 121.7 (two carbons), 119.7, 119.6, 111.8, 111.3, 110.1, 109.8, 83.1, 81.9, 65.0, 61.4, 54.2, 53.5, 32.4, 29.3, 27.2, 27.2, 27.1; **IR** (film)  $\nu_{\text{max}}$  3455, 3364, 3220, 2884, 2019, 1722, 1711, 1665, 1461, 1223, 1207, 1185, 702, 606  $\text{cm}^{-1}$ ; **HRMS** (ESI)  $m/z$

$[M + Na]^+$  Calcd for  $[C_{24}H_{24}N_2O_4 + Na]^+$  427.1628; Found 427.1606; **MP** 120 - 122 °C; Enantiomeric peaks was determined *via* HPLC analysis using a Chiralpak OZ-3 column; solvent: hexane/2-propanol = 70/30; flow rate: 1.0 mL/min; detection: at 254 nm); in case of major diastereomer  $t_{R1} = 4.93$  min,  $t_{R2} = 17.01$  min. for 0% ee; in case of minor diastereomer  $t_{R1} = 8.58$  min,  $t_{R2} = 10.53$  min. for 0% ee.

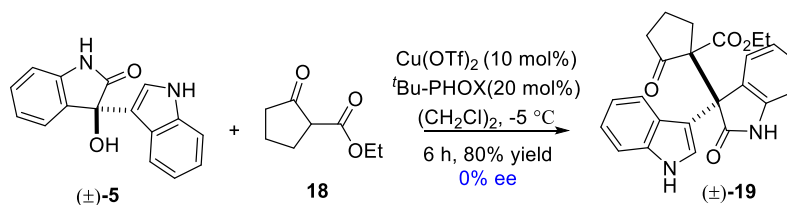

**Synthesis of compound (±)-19 from enantioselective method:** An oven dried sample vial was charged with  $Cu(OTf)_2$  (0.1 equiv) and  $tBu-PHOX$  (0.2 equiv) in dichloromethane (4 mL) at 25 °C under nitrogen atmosphere. The reaction mixture was stirred for 30 minutes to make the complex. After that the reaction vessel was cooled to -5 °C and compound 18 (3.0 equiv) was added to the mixture and stirring was continued for 15 minutes maintaining temperature -5 °C. Then, a solution of 3-hydroxy 2-oxindole in dichloromethane (0.5 mL) was added slowly to the reaction mixture. Then the reaction mixture was allowed to stir for 6 h at -5 °C. After complete consumption of starting material (as judged by running TLC), the crude mixture was concentrated under reduced pressure and purified by column chromatography by using 30-40% EtOAc-hexane mixture as eluent to afford the desired compound.

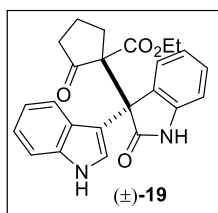

**Ethyl-1-(3-(1*H*-indol-3-yl)-2-oxoindolin-3-yl)-2-oxocyclopentane-1-carboxylate:**

Compound (±)-**19** was obtained as a colourless solid (0.08 mmol scale of reaction, 25 mg of product, 80% yield); dr = 4.7:1 (determined from un purified reaction mixture] of (±)-**19**;  $R_f = 0.31$  (40% EtOAc in hexane);  $^1H$  NMR (400 MHz,  $CDCl_3$ , spectrum contains ~4.7:1 diastereomers)  $\delta$  8.92 (s, 2H for major + minor diastereomers), 8.65 (s,



2H for major + minor diastereomers), 8.26 (s, 2H for major + minor diastereomers), 7.87 (s, 1H for minor diastereomer), 7.67 (s, 1H for major diastereomer), 7.31 - 6.96 (m, 12H for major + minor diastereomers), 6.73 (s, 2H for major + minor diastereomers), 4.06 - 3.74 (m, 4H for major + minor diastereomers), 3.15 - 2.94 (m, 4H for major + minor diastereomers), 2.63 - 2.28 (m, 4H for major + minor diastereomers), 2.00 - 1.76 (m, 4H for major + minor diastereomers), 1.06 - 0.64 (m, 6H for major + minor diastereomers); **<sup>13</sup>C NMR** (100 MHz, CDCl<sub>3</sub>, spectrum contains ~4.7:1 diastereomers)  $\delta$  213.5, 212.8, 179.8, 179.0, 170.9, 170.2, 141.1, 141.1, 136.6, 136.5, 131.9, 131.6, 128.7, 128.6, 128.4, 128.3, 127.4, 127.3, 125.9, 125.8, 122.2, 121.8, 121.8, 121.7, 121.6, 121.3, 119.7, 119.6, 111.6, 110.6, 110.1, 109.7, 109.6, 109.1, 66.5, 66.3, 61.8, 61.7, 55.7, 55.7, 39.1, 38.7, 33.4, 33.1, 19.6, 19.4, 13.7, 13.5; **IR** (film)  $\nu_{\max}$  3545, 3334, 3210, 2980, 2119, 1742, 1721, 1645, 1601, 1423, 1287, 1285, 1002, 806 cm<sup>-1</sup>; **HRMS** (ESI)  $m/z$  [M + Na]<sup>+</sup> Calcd for [C<sub>24</sub>H<sub>22</sub>N<sub>2</sub>O<sub>4</sub> + Na]<sup>+</sup> 425.1472; Found 425.1460; **MP** 100 - 102 °C; Enantiomeric peaks was determined *via* HPLC analysis using a Chiralpak AS-3 column; solvent: hexane/2-propanol = 60/40; flow rate: 1.0 mL/min; detection: at 254 nm); in case of minor diastereomer  $t_{R1}$  = 5.24 min,  $t_{R2}$  = 12.72 min. for 0% ee; in case of major diastereomer  $t_{R1}$  = 7.11 min,  $t_{R2}$  = 21.71 min. for 0% ee.

## References and notes:

1. Wang, C. H.; White, A. R.; Schwartz, S. N.; Alluri, S.; Cattabiani, T. M.; Zhang, L. K. Chan, T. M.; Buevich, A. V.; Ganguly, A. K. *Tetrahedron* **2012**, *68*, 9750.
2. Srihari, G.; Murthy, M. M. *Synth. Commun.* **2011**, *41*, 2684.
3. Prathima, P. S.; Ranjesh, P.; Rao, J. V.; Kailash, U. S.; Sridhar, B. *Eur. J. Med. Chem.* **2014**, *84*, 155.
4. Kinthada, L. K.; Babu, K. N.; Padhi, D.; Bisai, A. *Eur. J. Org. Chem.* **2017**, 3078.
5. Babu, K. N.; Kinthada, L. K.; Ghosh, S.; Bisai, A. *Org. Biomol. Chem.* **2015**, *13*, 10641.

## Spectral Graphics

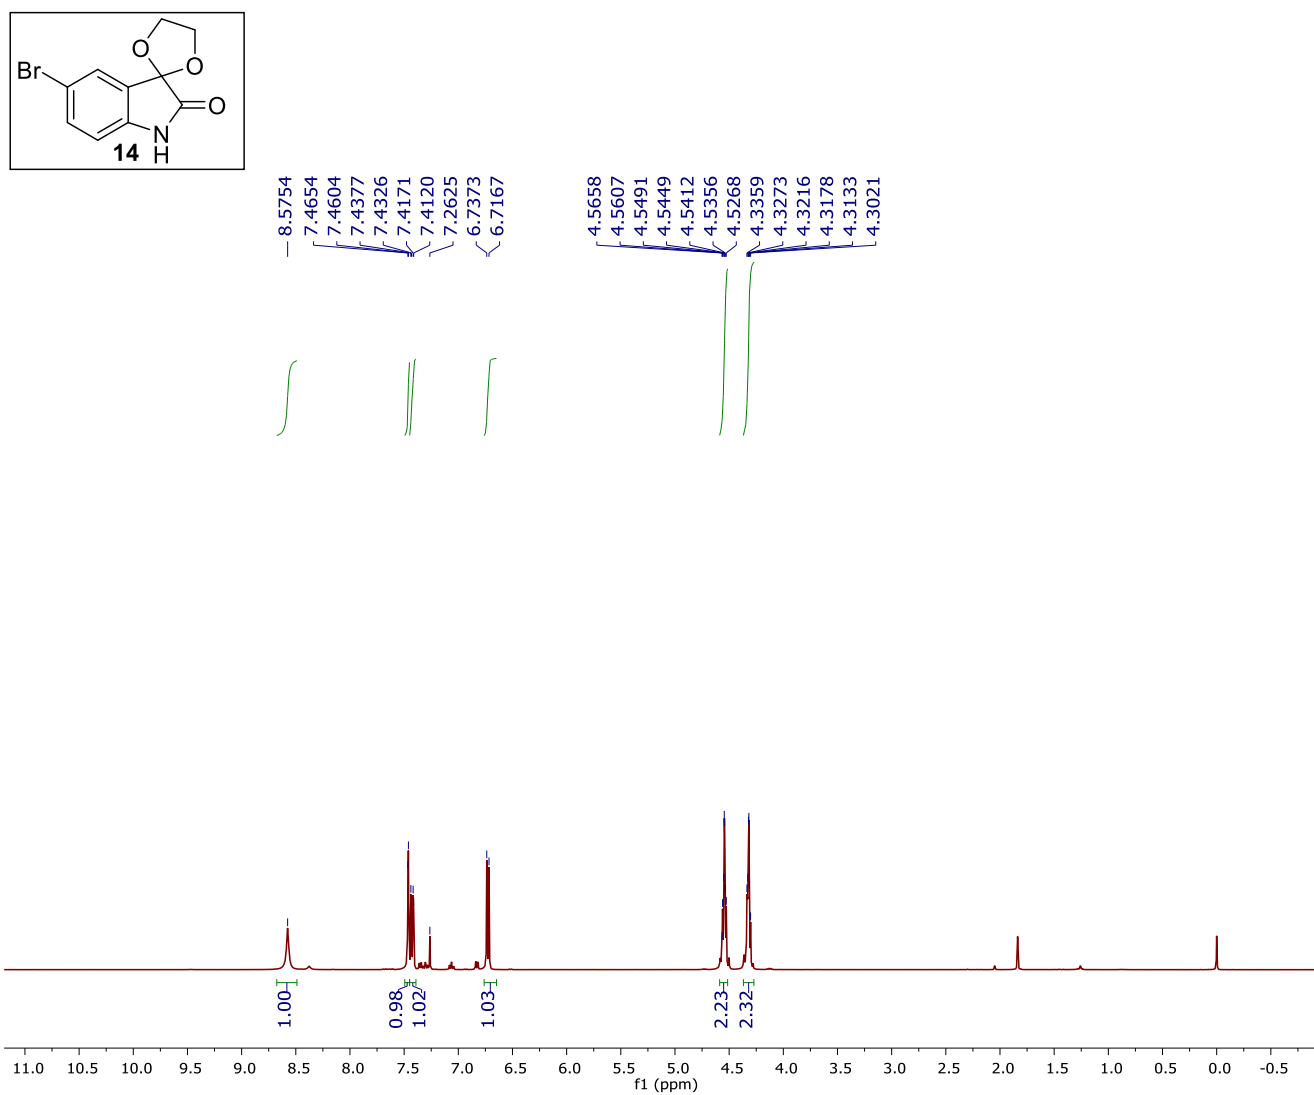<sup>1</sup>H NMR (400 MHz, CDCl<sub>3</sub>) of compound **14**

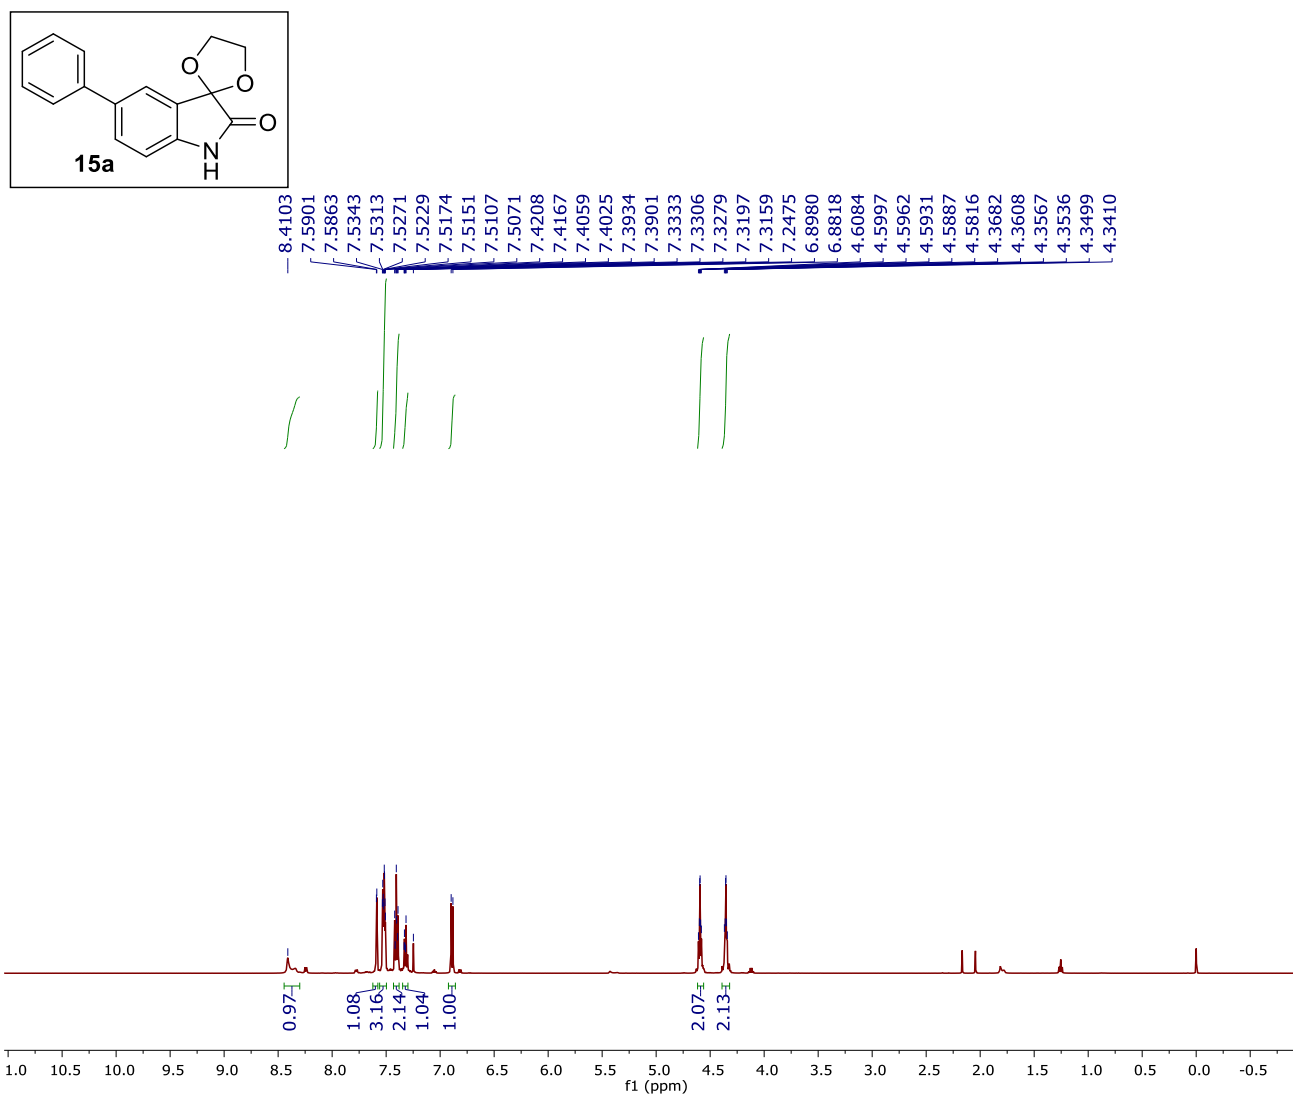

<sup>1</sup>H NMR (500 MHz, CDCl<sub>3</sub>) of compound **15a**

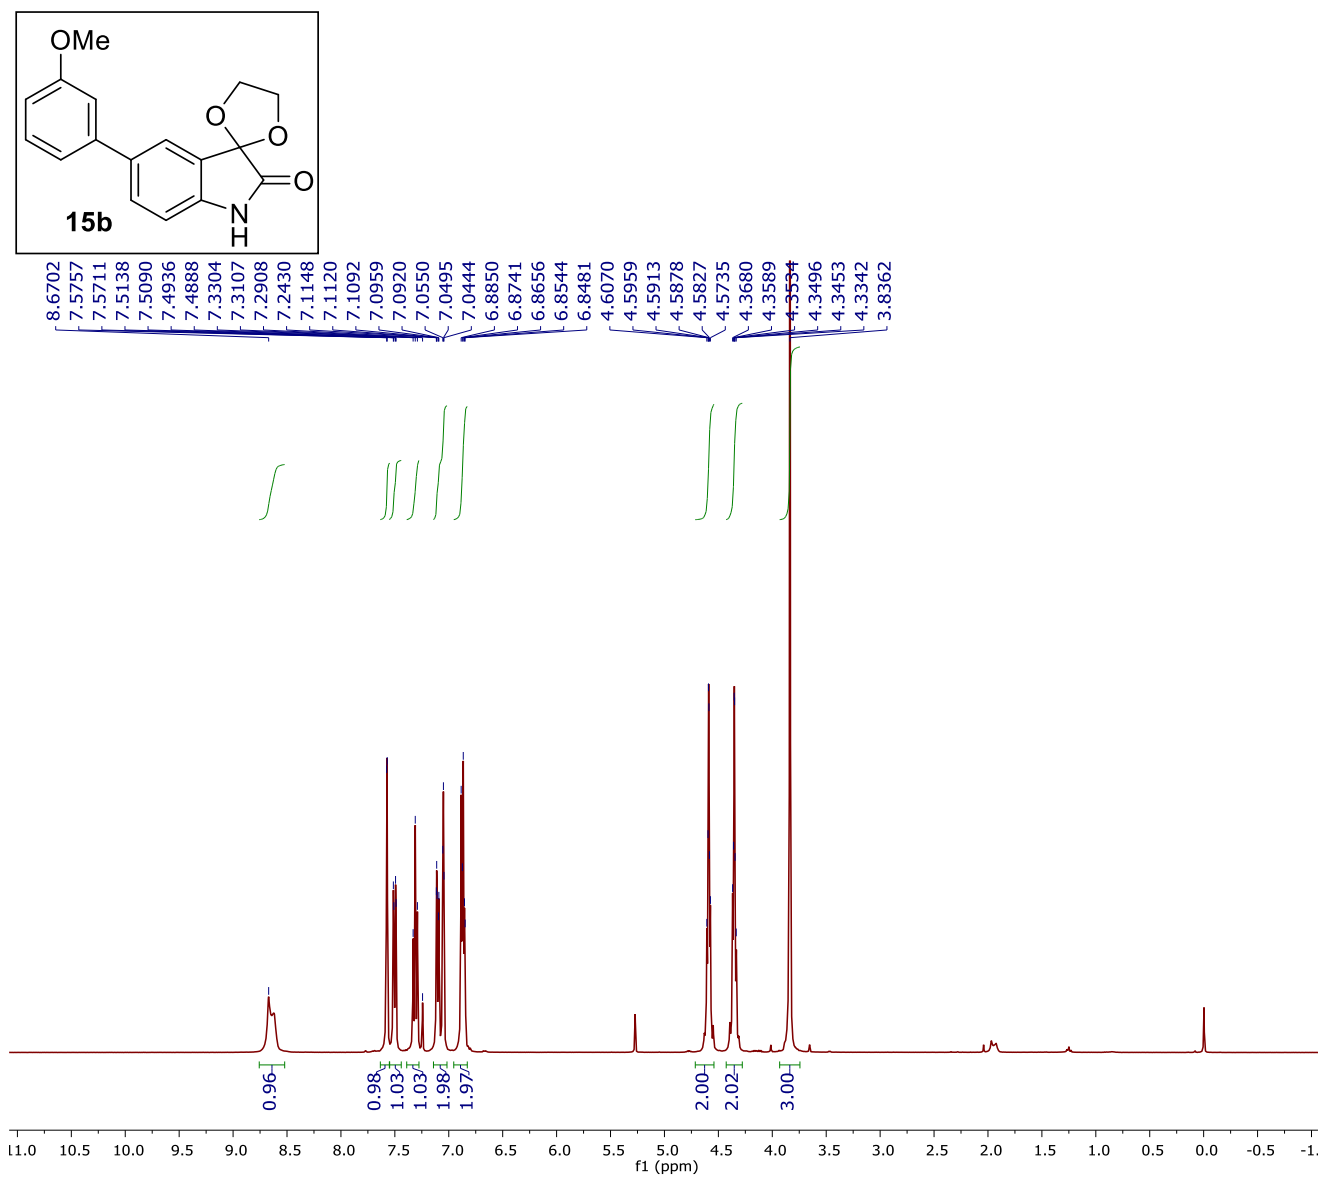<sup>1</sup>H NMR (400 MHz, CDCl<sub>3</sub>) of compound **15b**

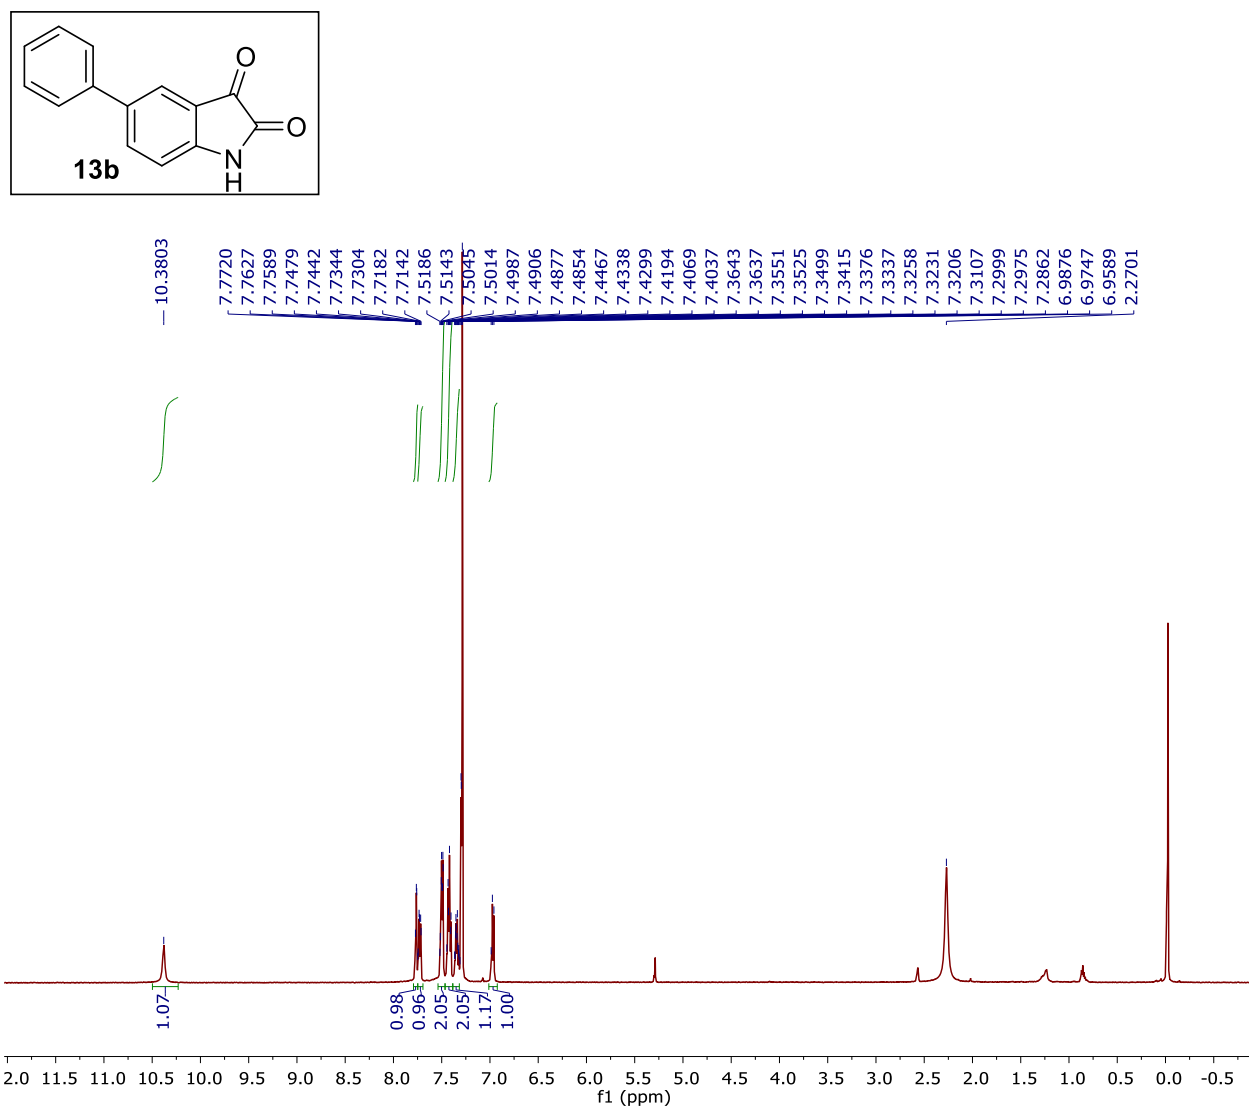

$^1\text{H}$  NMR (100 MHz, 0.4 mL  $\text{CDCl}_3$ , 0.1 mL  $\text{DMSO}-\text{D}_6$ ) of compound **13b**

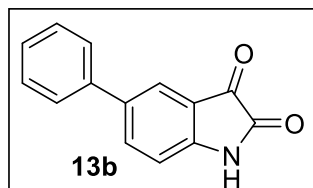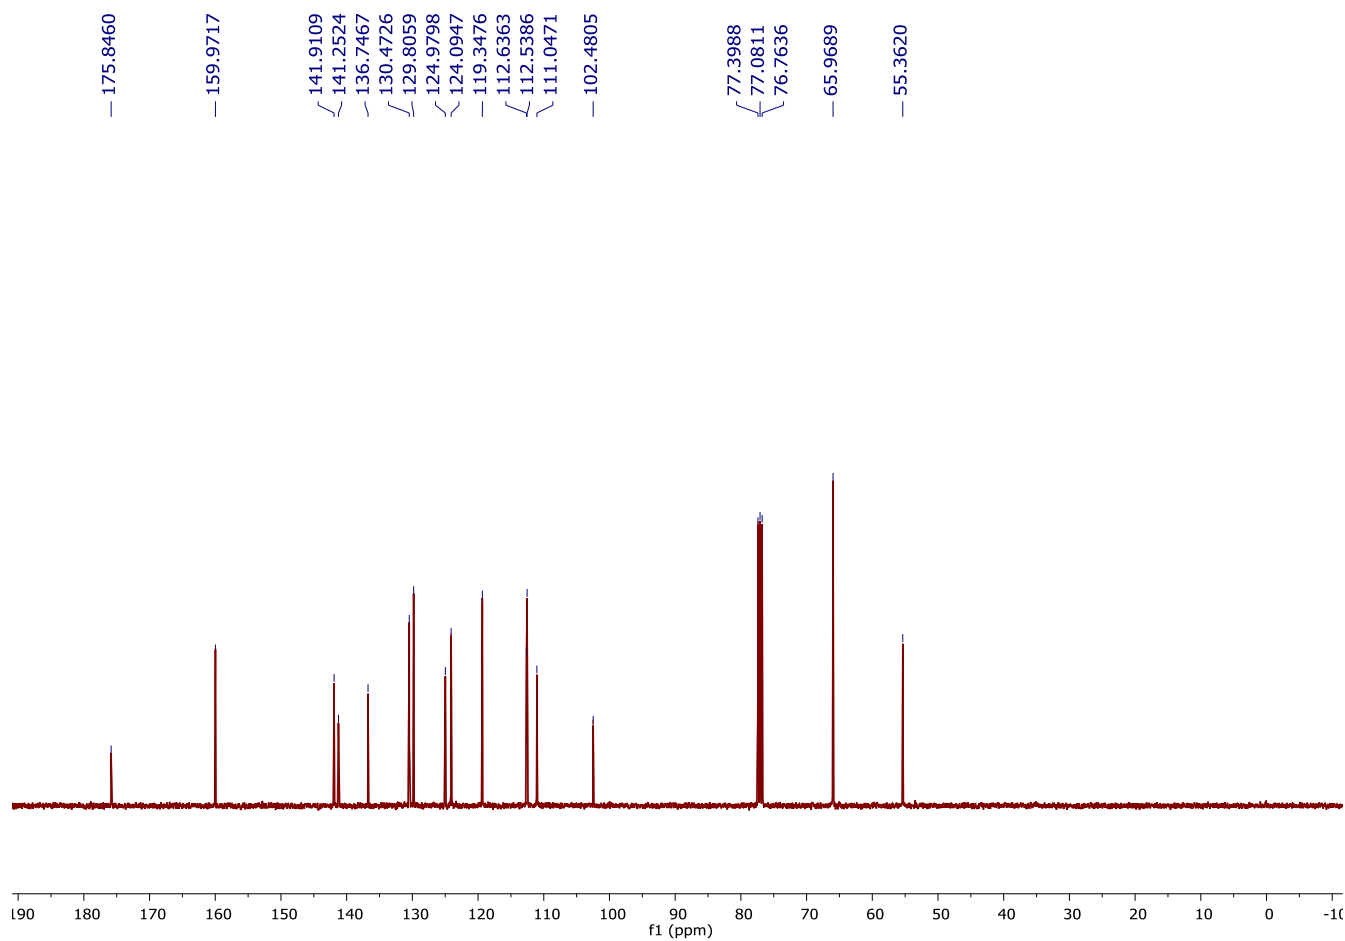

$^{13}\text{C}$  NMR (100 MHz, 0.4 mL  $\text{CDCl}_3$ , 0.1 mL  $\text{DMSO-D}_6$ ) of compound **13b**

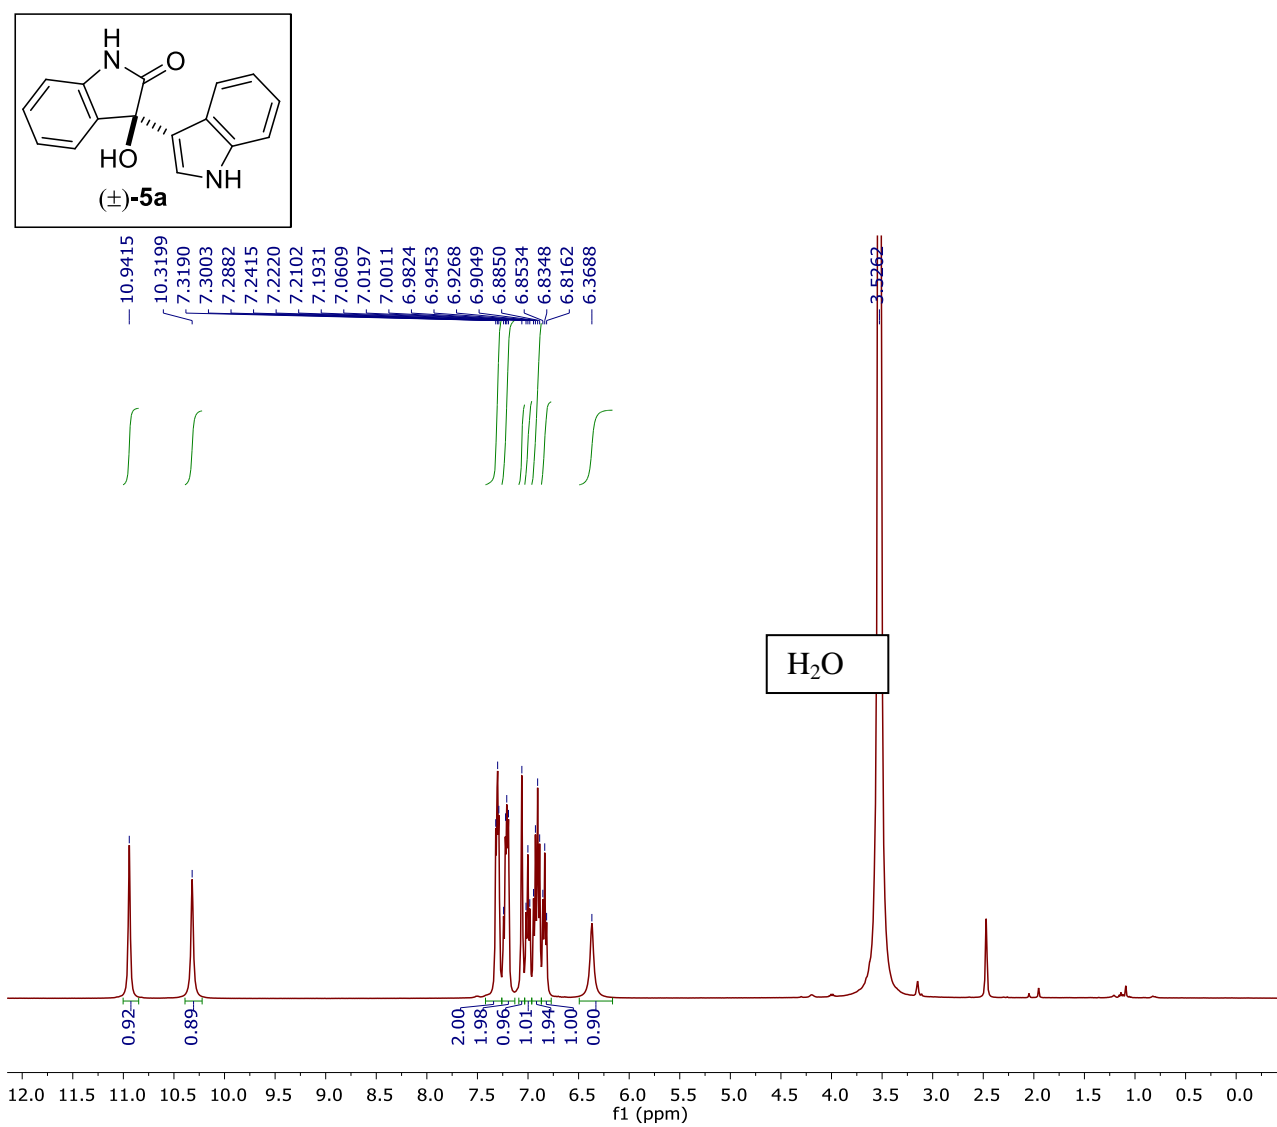

<sup>1</sup>H NMR (400 MHz, DMSO-D<sub>6</sub>) of compound **(±)-5a**

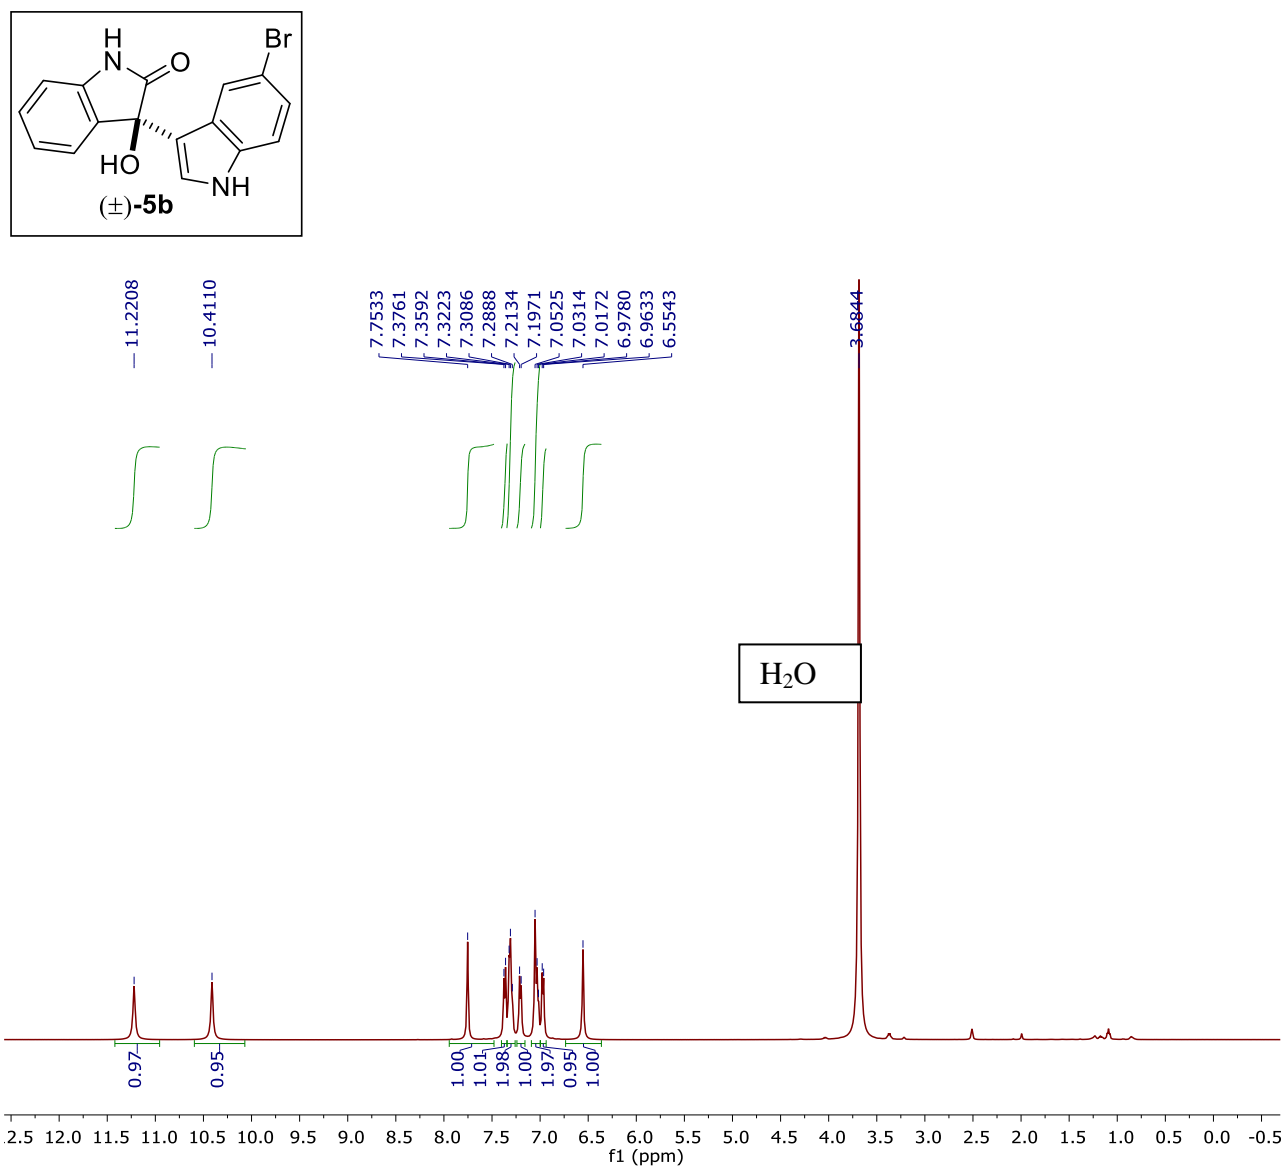

$^1\text{H}$  NMR (500 MHz, DMSO- $\text{D}_6$ ) of compound ( $\pm$ )-**5b**



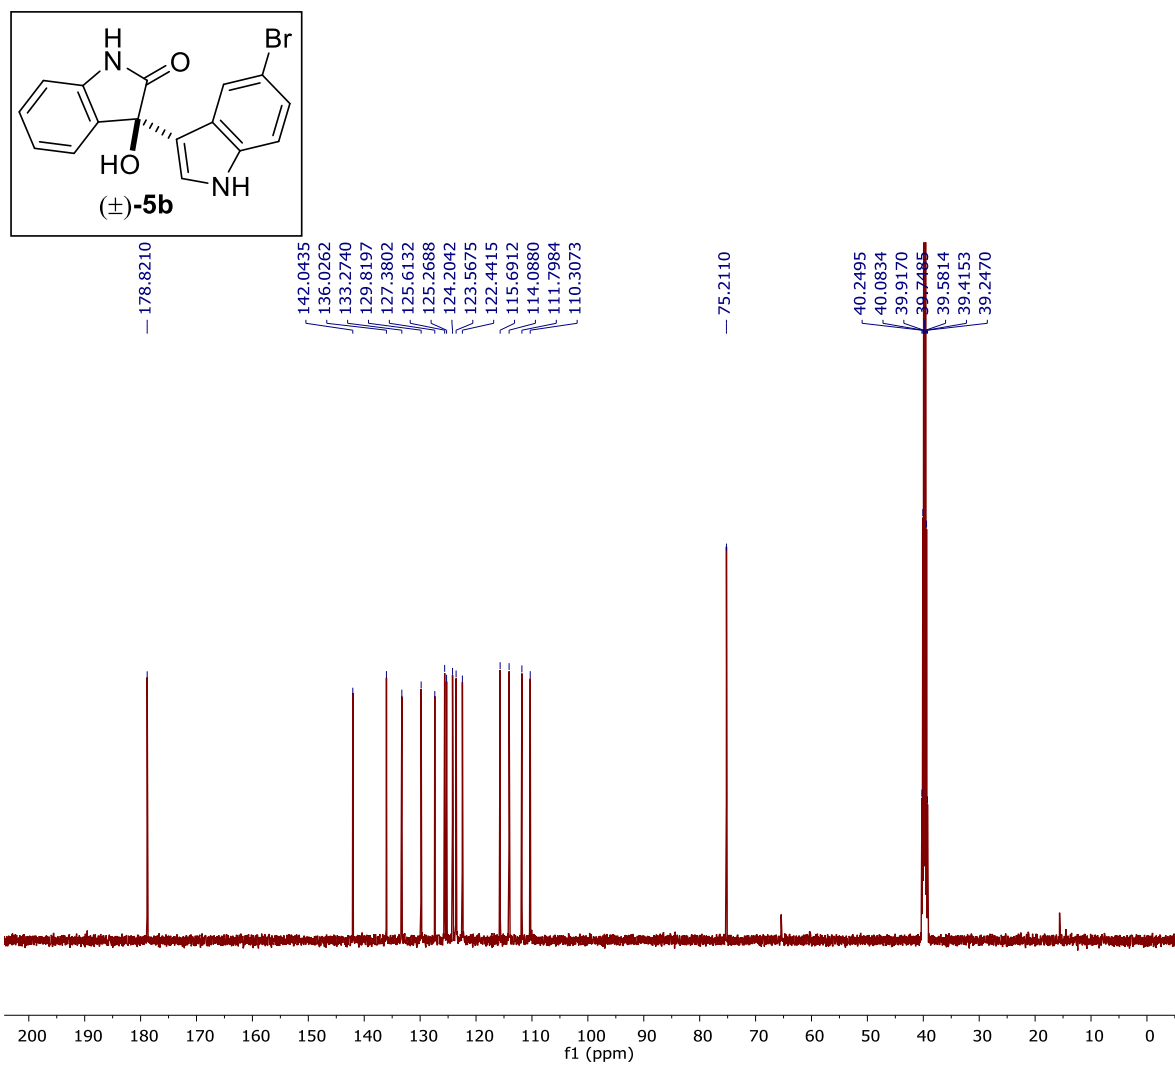

$^{13}\text{C}$  NMR (125 MHz, DMSO- $\text{D}_6$ ) of compound (±)-**5b**

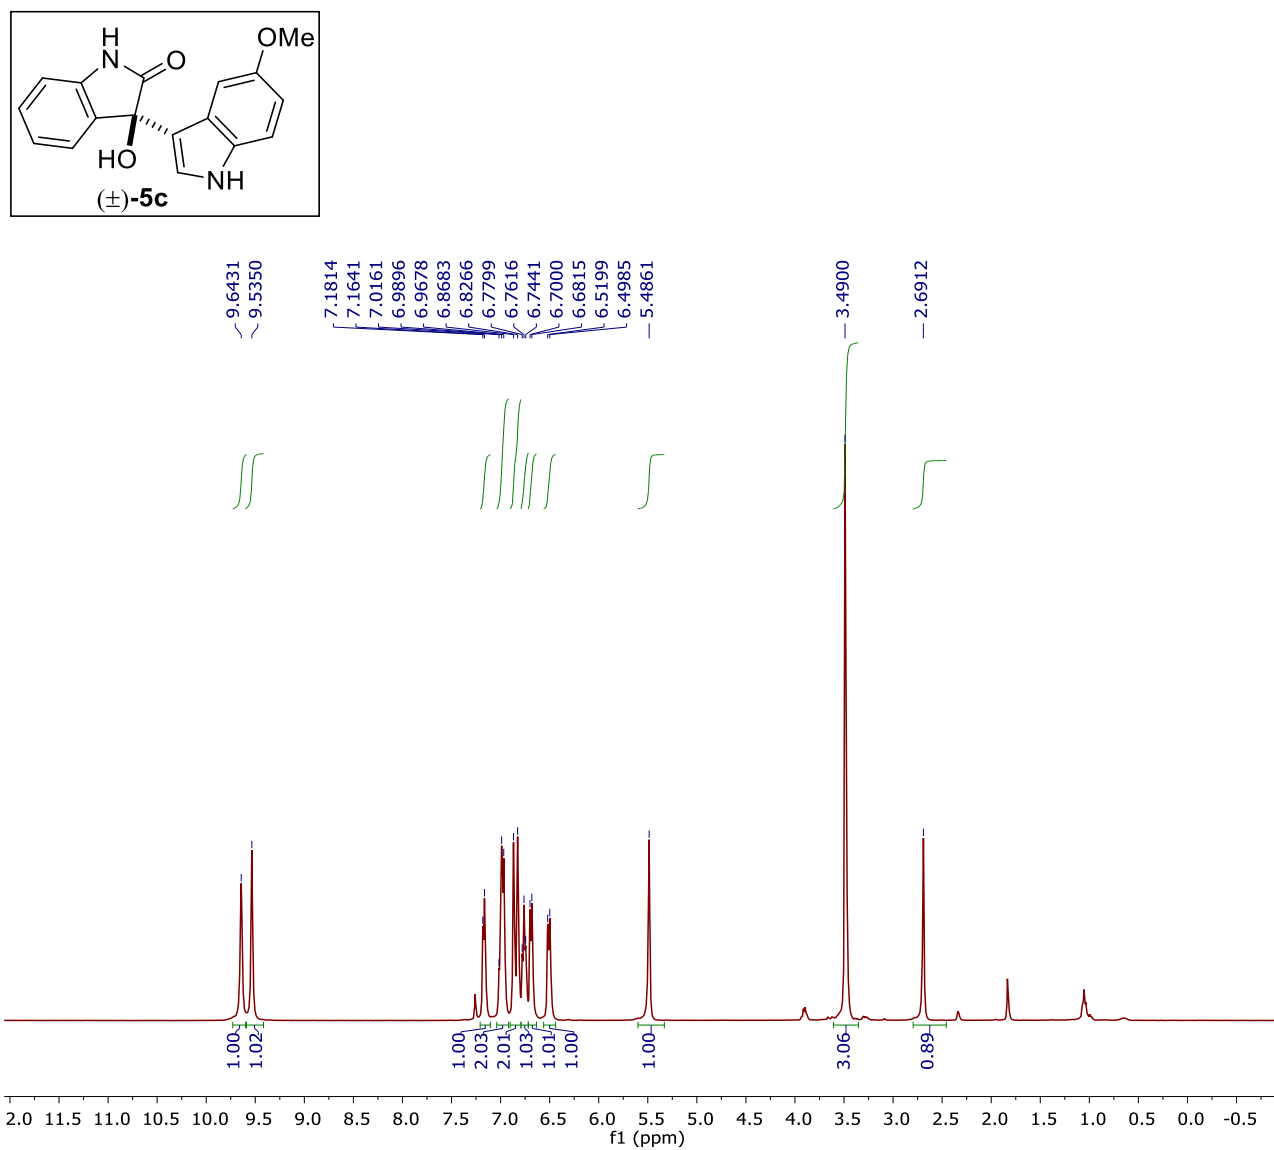

<sup>1</sup>H NMR (400 MHz, CDCl<sub>3</sub>) of compound **(±)-5c**

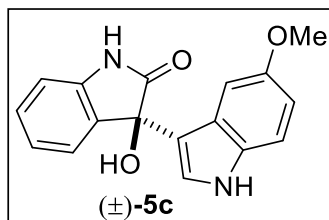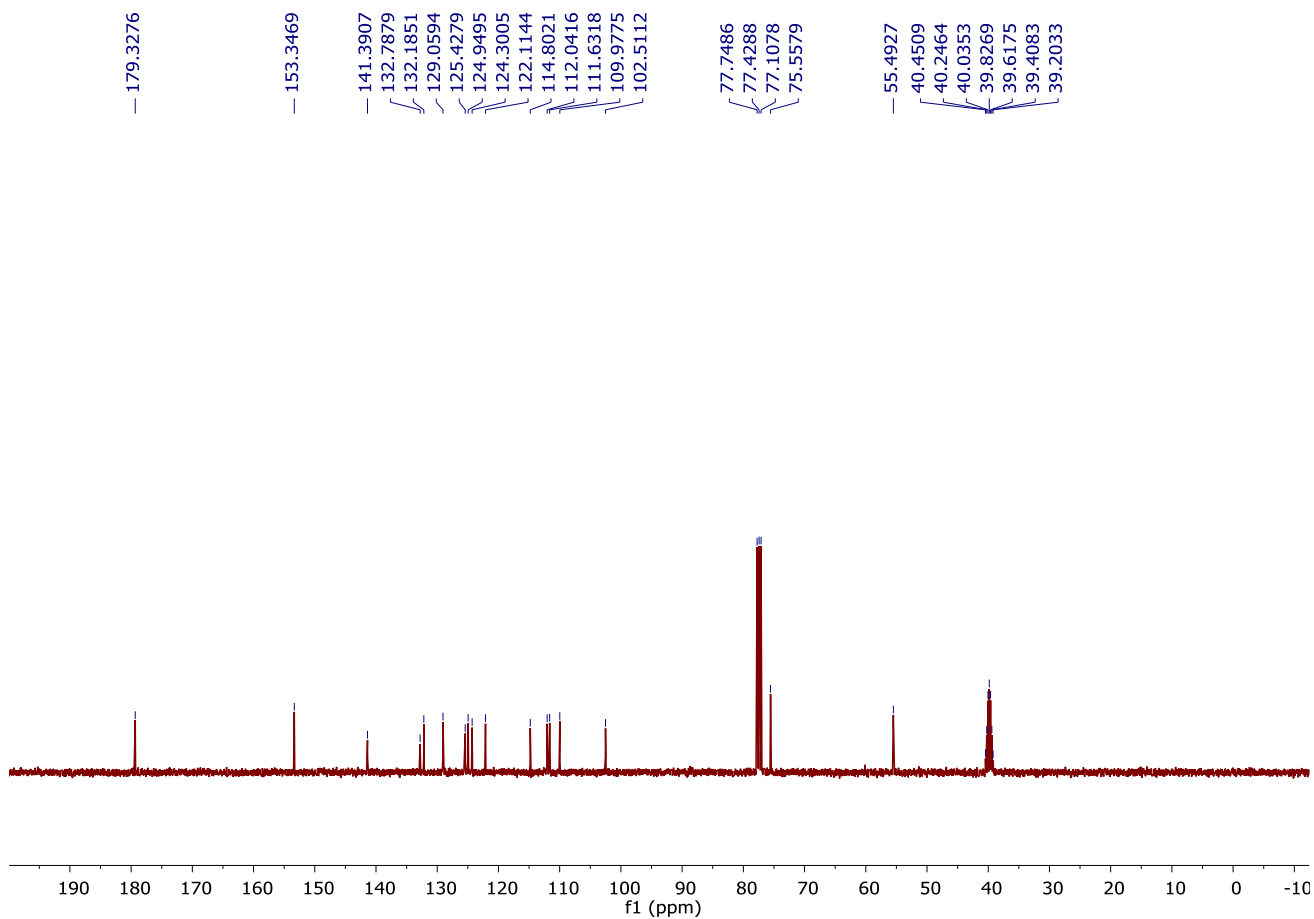

$^{13}\text{C}$  NMR (100 MHz, 0.4 mL  $\text{CDCl}_3$ , 0.1 mL  $\text{DMSO-D}_6$ ) of compound (±)-**5c**

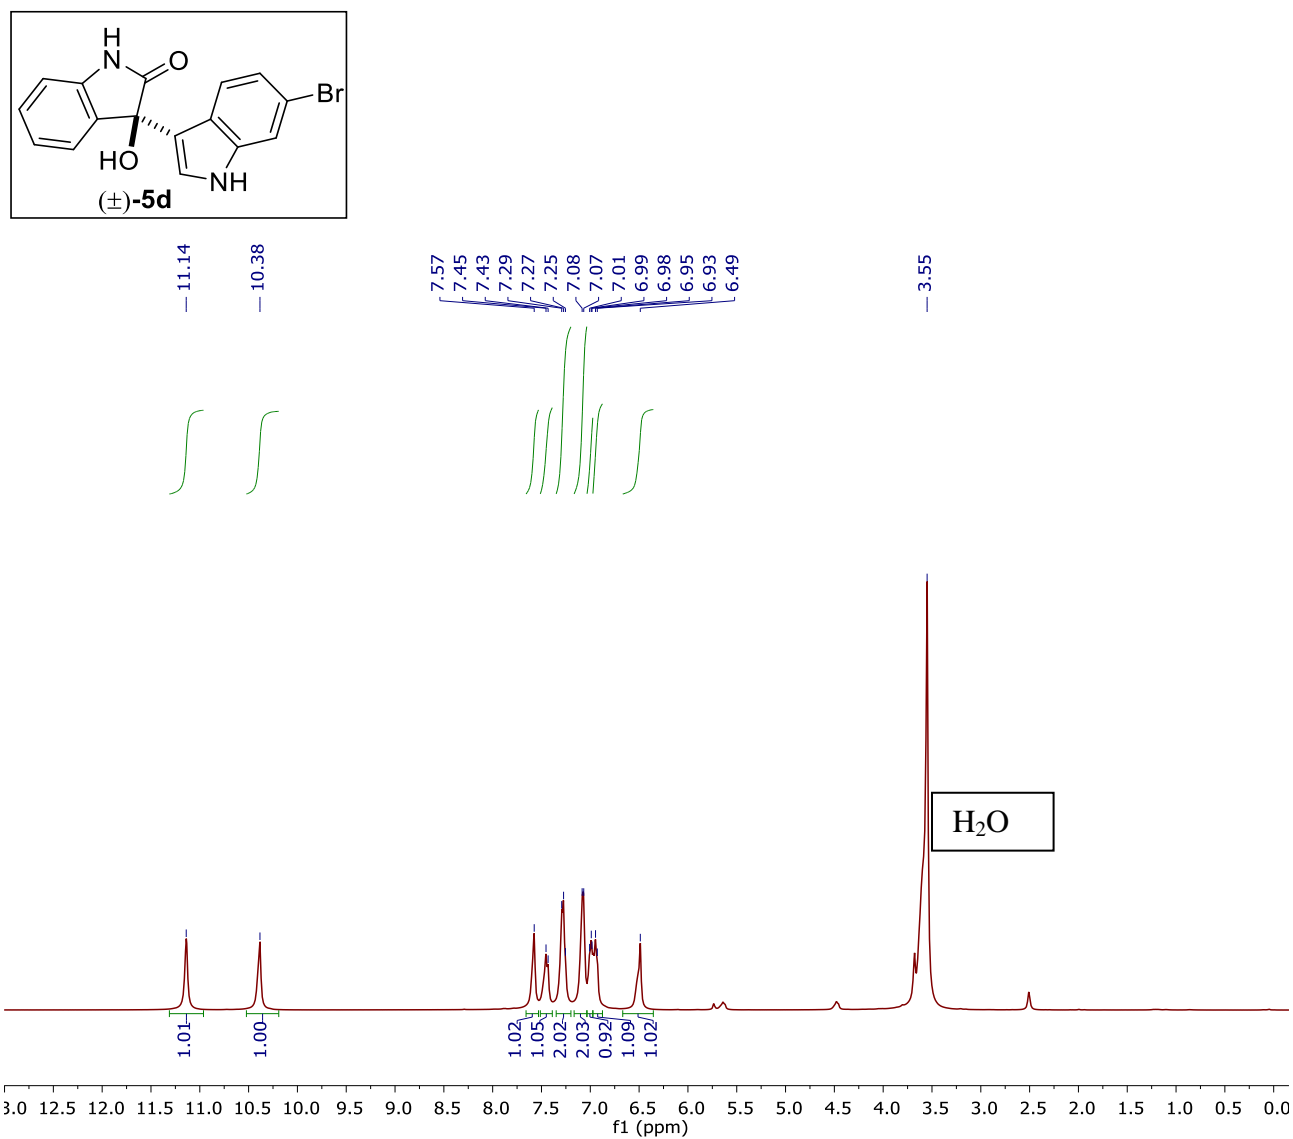

$^1\text{H}$  NMR (400 MHz, DMSO- $\text{D}_6$ ) of compound **(±)-5d**

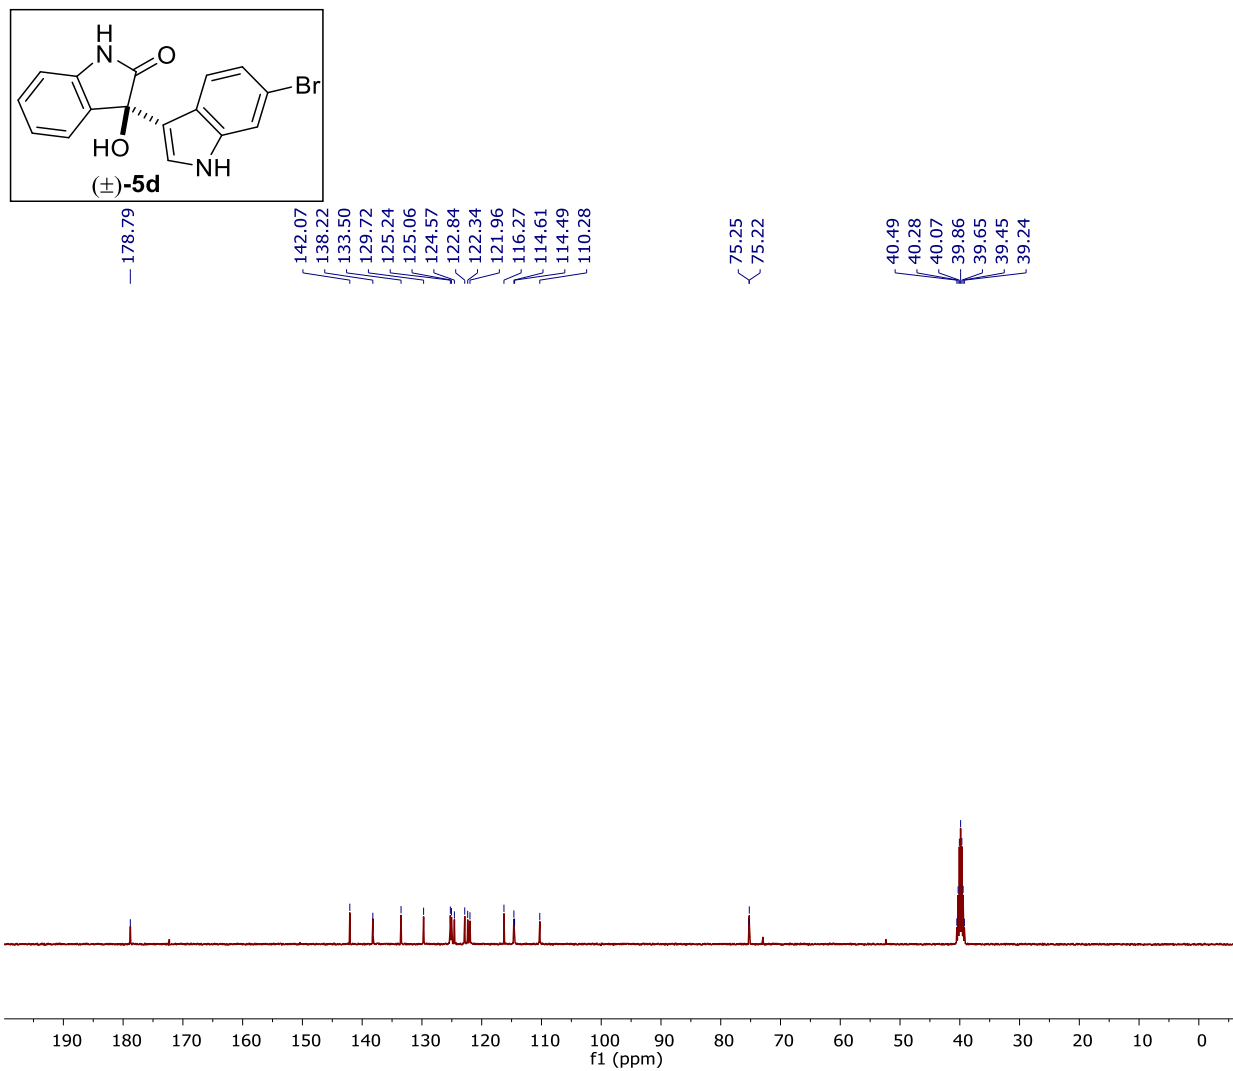

<sup>13</sup>C NMR (100 MHz, DMSO-D<sub>6</sub>) of compound **(±)-5d**

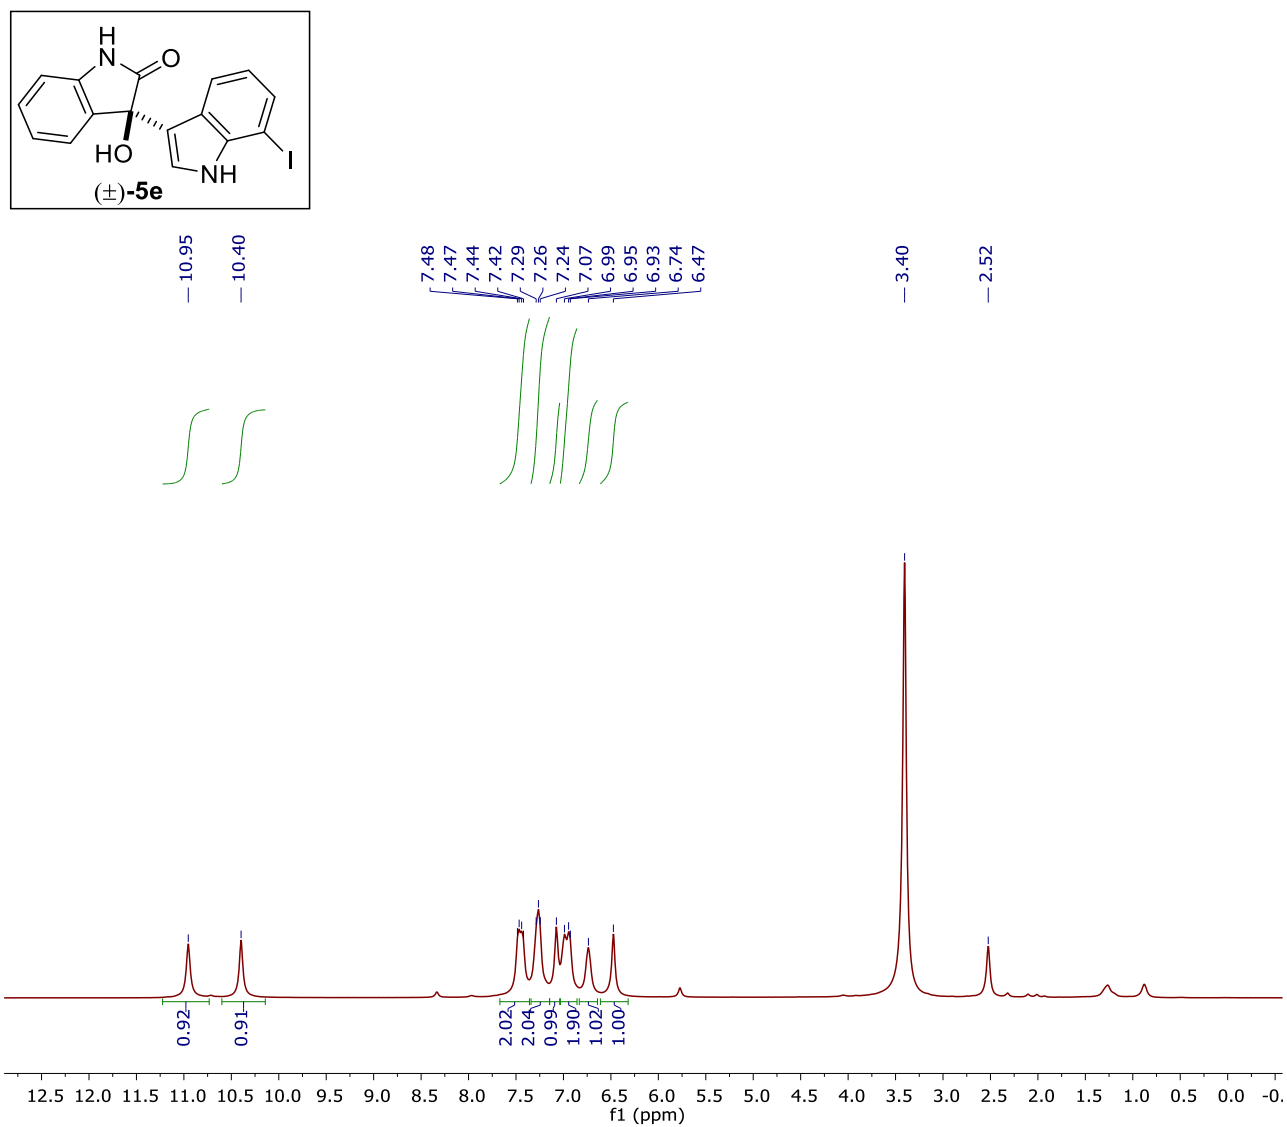

$^1\text{H}$  NMR (400 MHz, DMSO- $\text{D}_6$ ) of compound **(±)-5e**

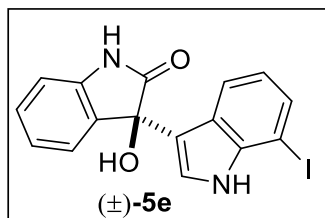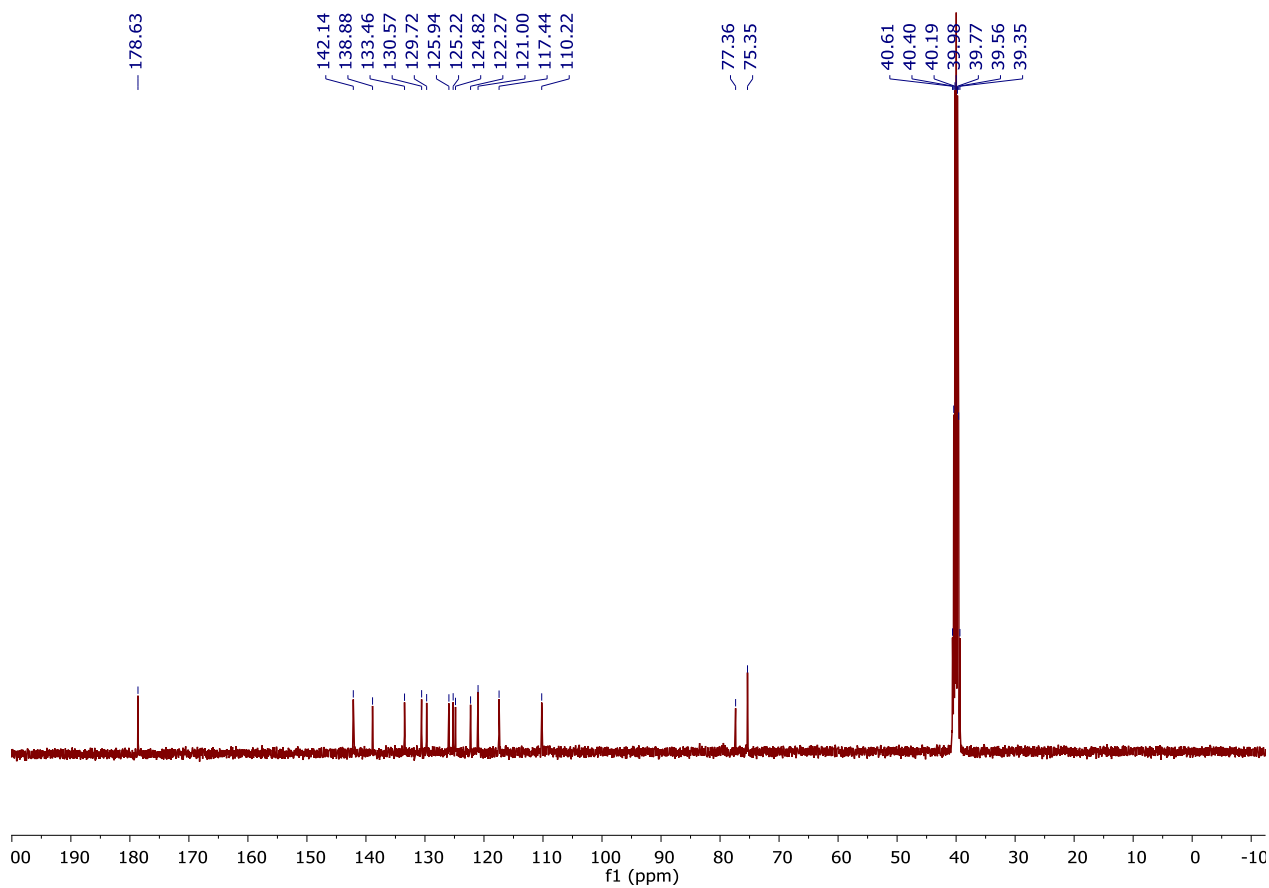

$^{13}\text{C}$  NMR (100 MHz, DMSO- $\text{D}_6$ ) of compound (±)-5e

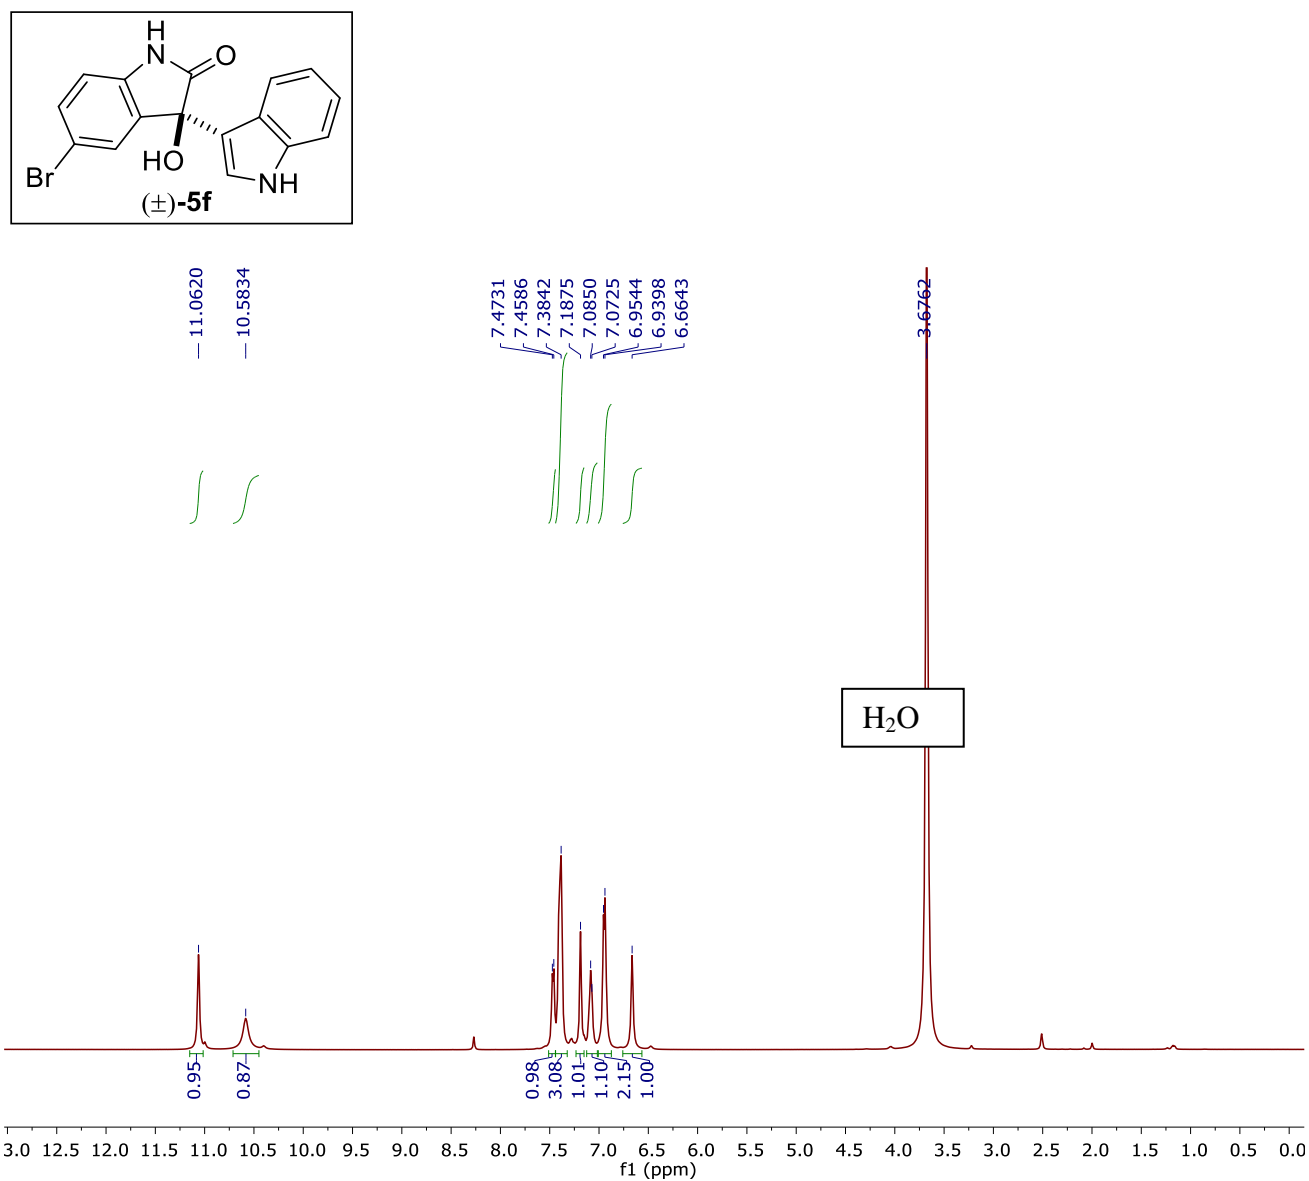 $^1\text{H}$  NMR (500 MHz, DMSO- $\text{D}_6$ ) of compound ( $\pm$ )-**5f**



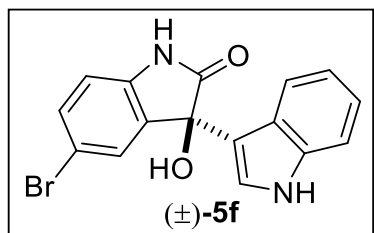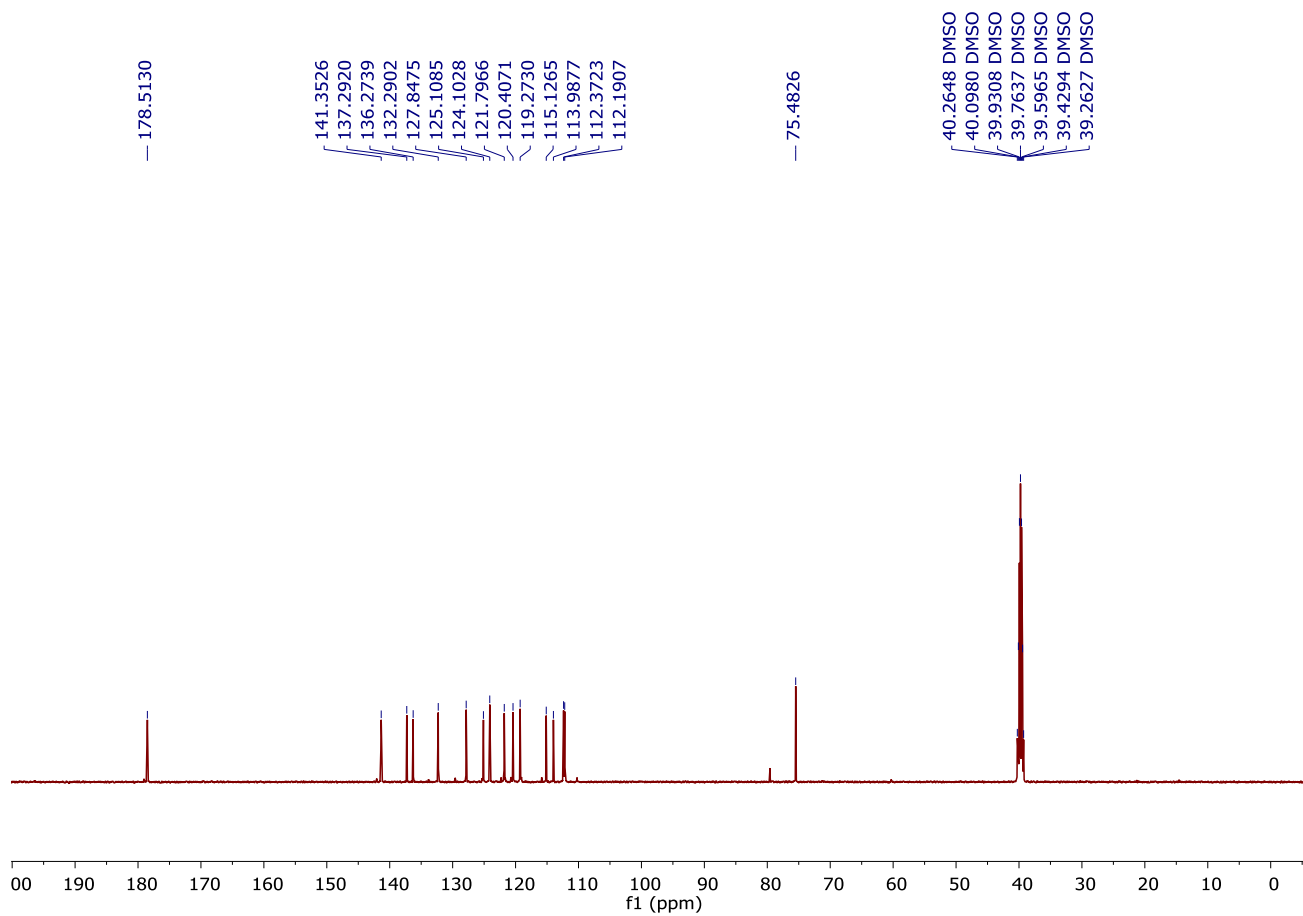

$^{13}\text{C}$  NMR (125 MHz, DMSO- $\text{D}_6$ ) of compound (±)-**5f**

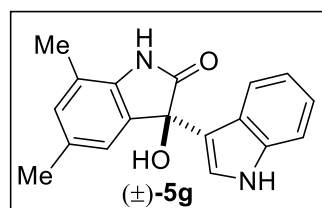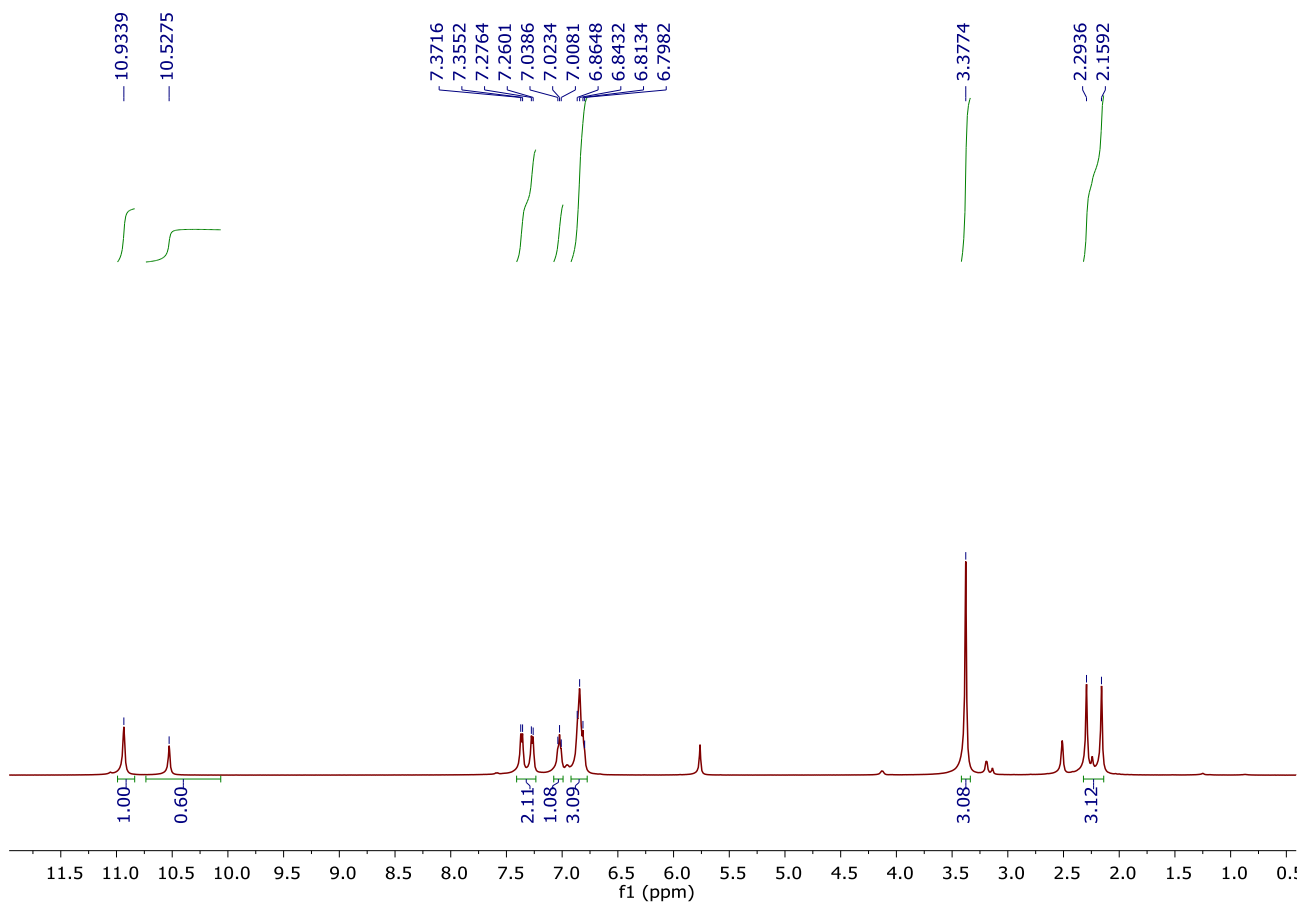

<sup>1</sup>H NMR (500 MHz, DMSO-D<sub>6</sub>) of compound (±)-**5g**

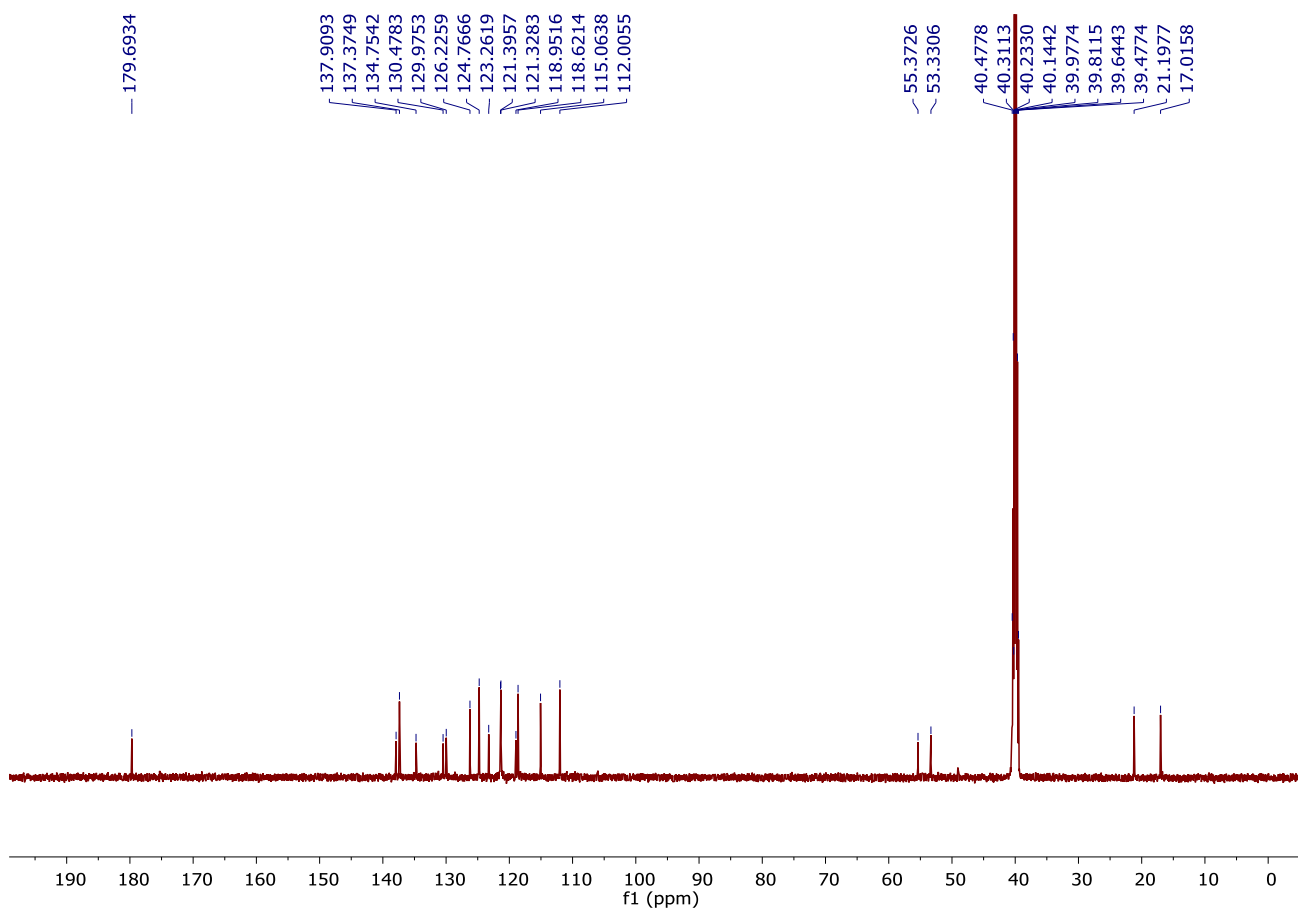

$^{13}\text{C}$  NMR (125 MHz, DMSO- $\text{D}_6$ ) of compound (±)-**5g**

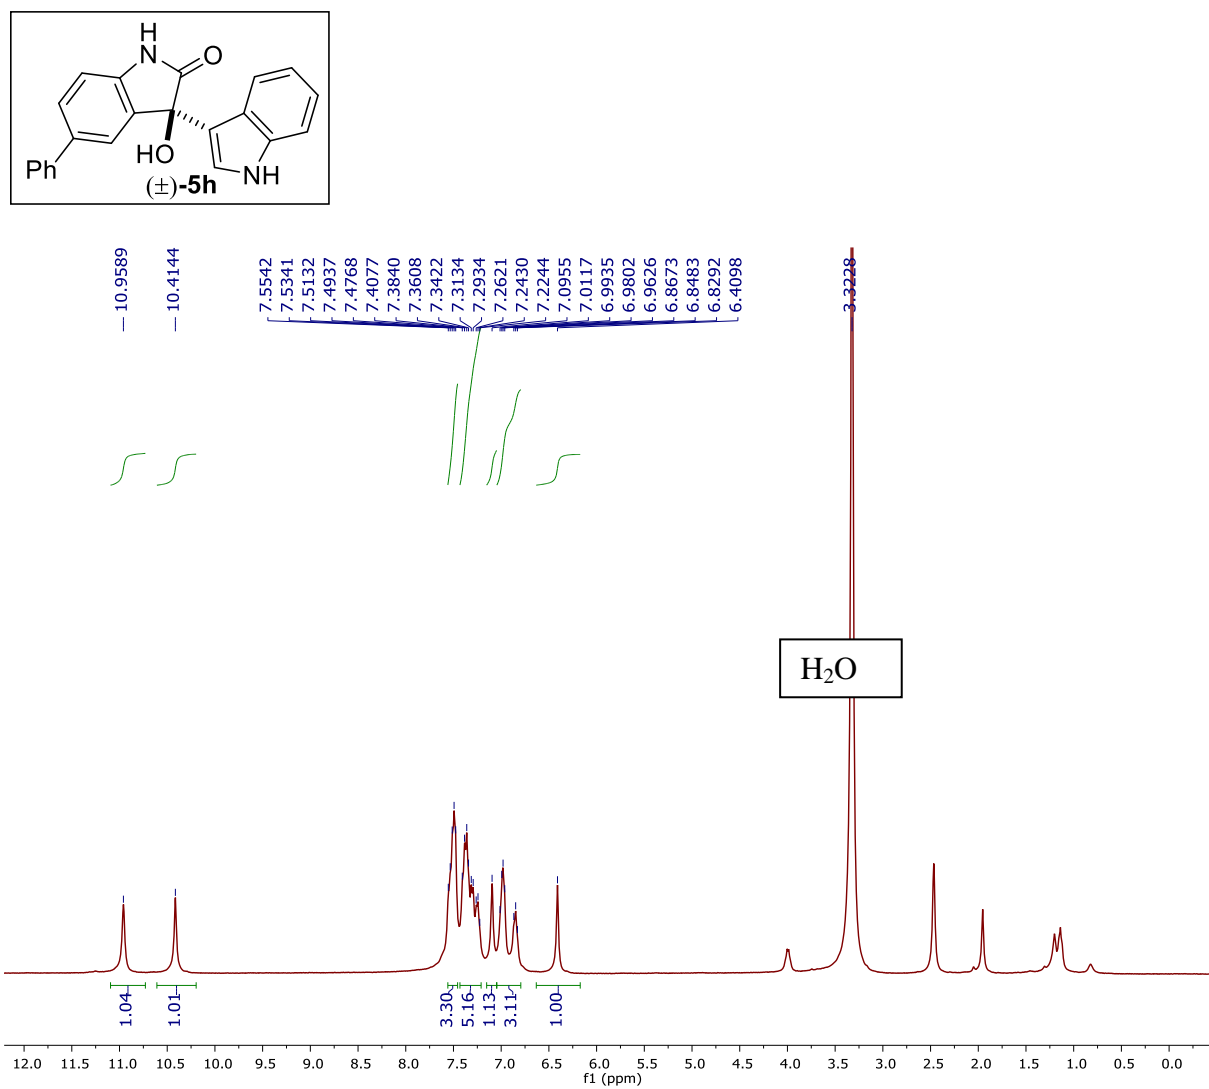

<sup>1</sup>H NMR (500 MHz, DMSO-D<sub>6</sub>) of compound **(±)-5h**

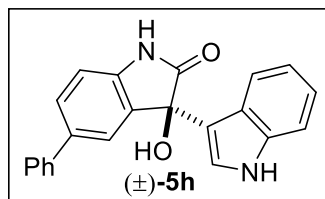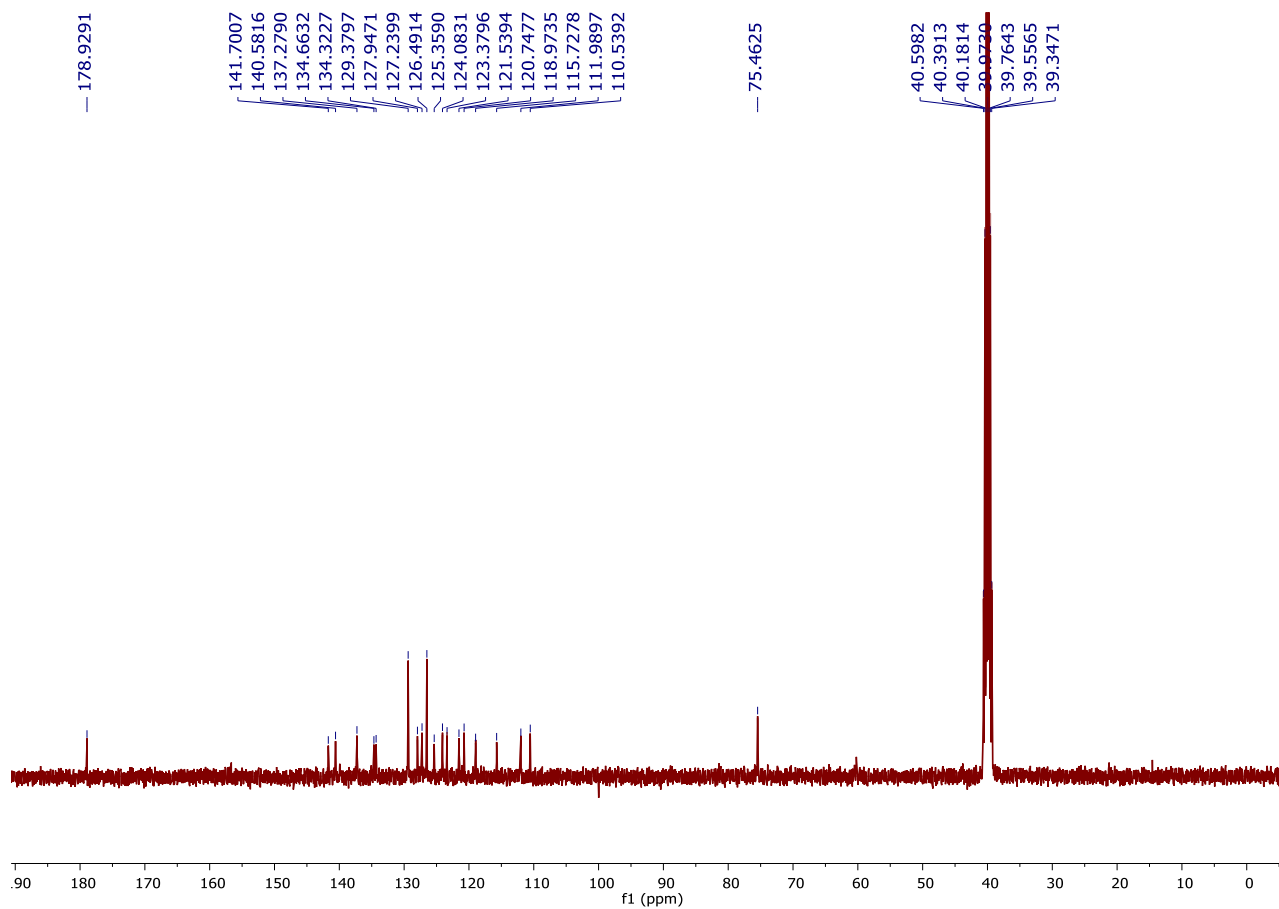

<sup>13</sup>C NMR (125 MHz, DMSO-D<sub>6</sub>) of compound (±)-5h

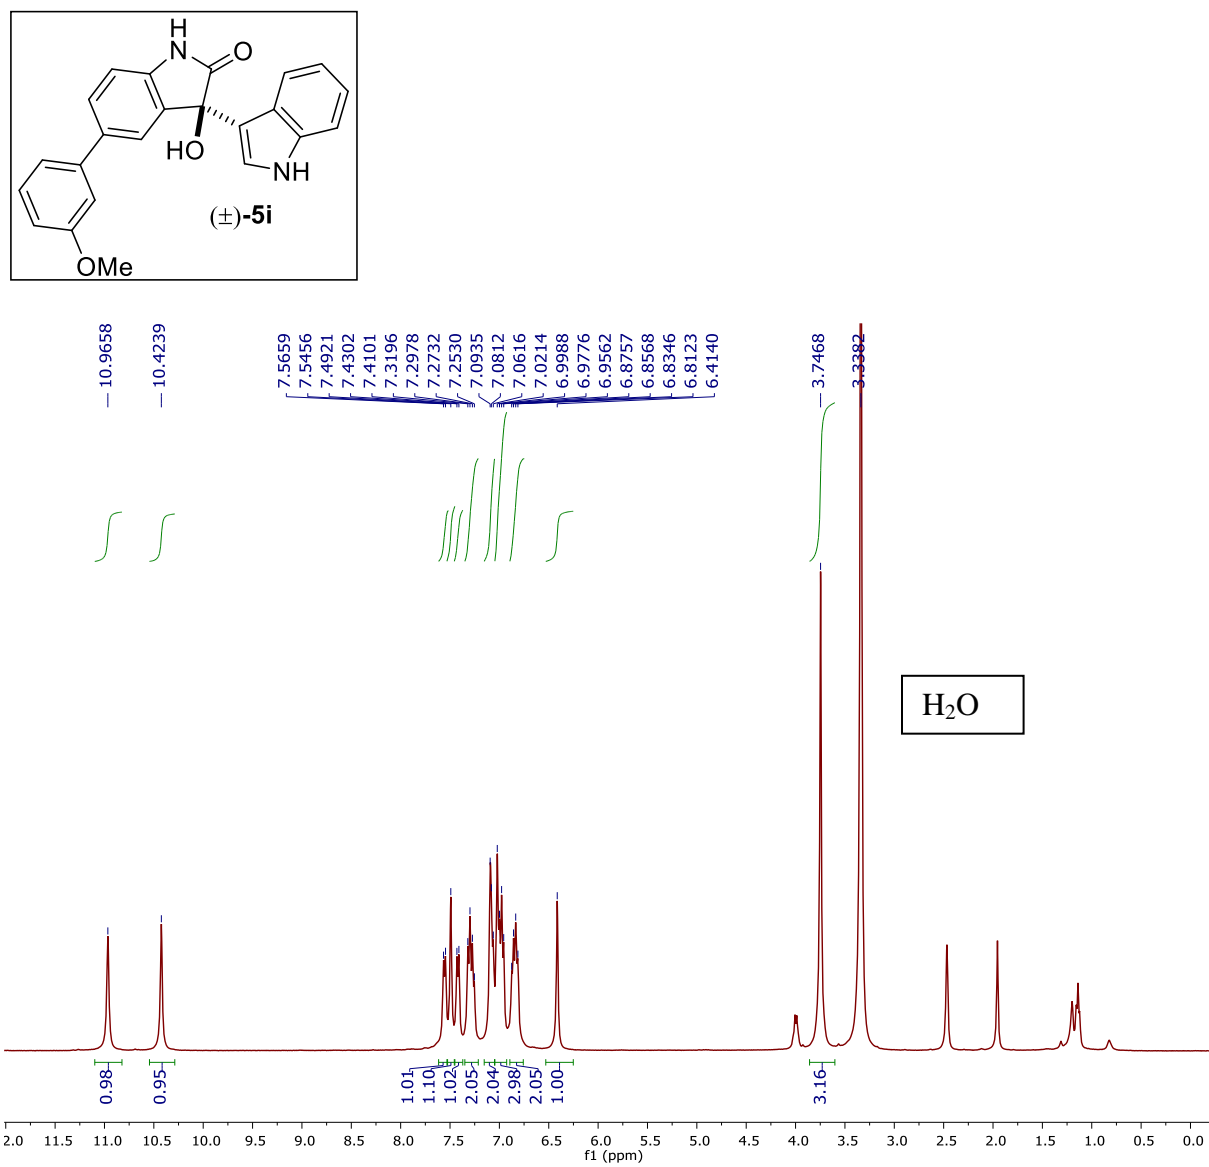 $^1\text{H}$  NMR (500 MHz, DMSO- $\text{D}_6$ ) of compound ( $\pm$ )-**5i**

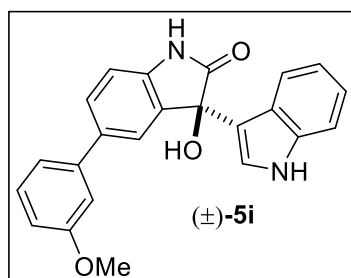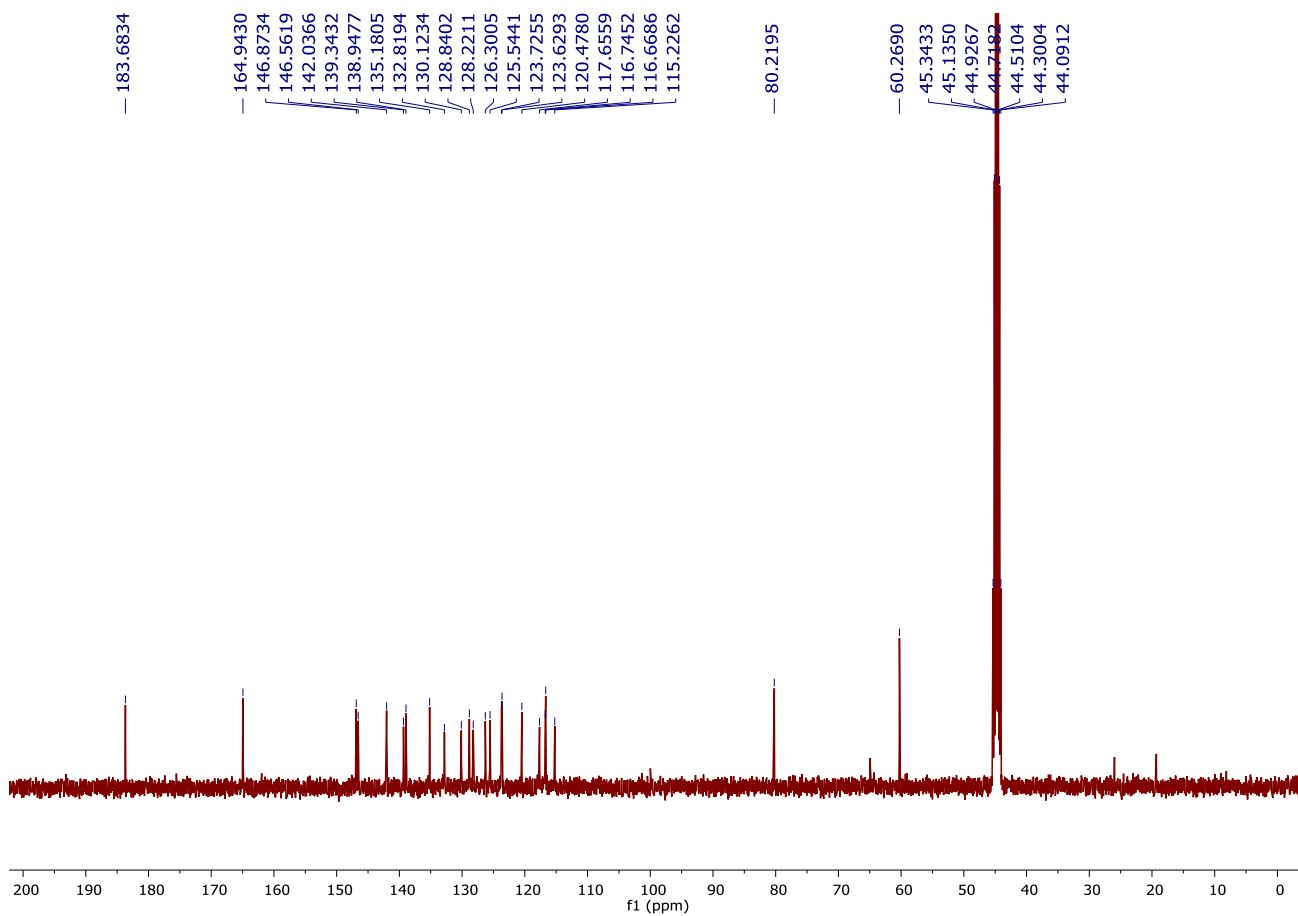

<sup>13</sup>C NMR (125 MHz, DMSO-D<sub>6</sub>) of compound (±)-**5i**

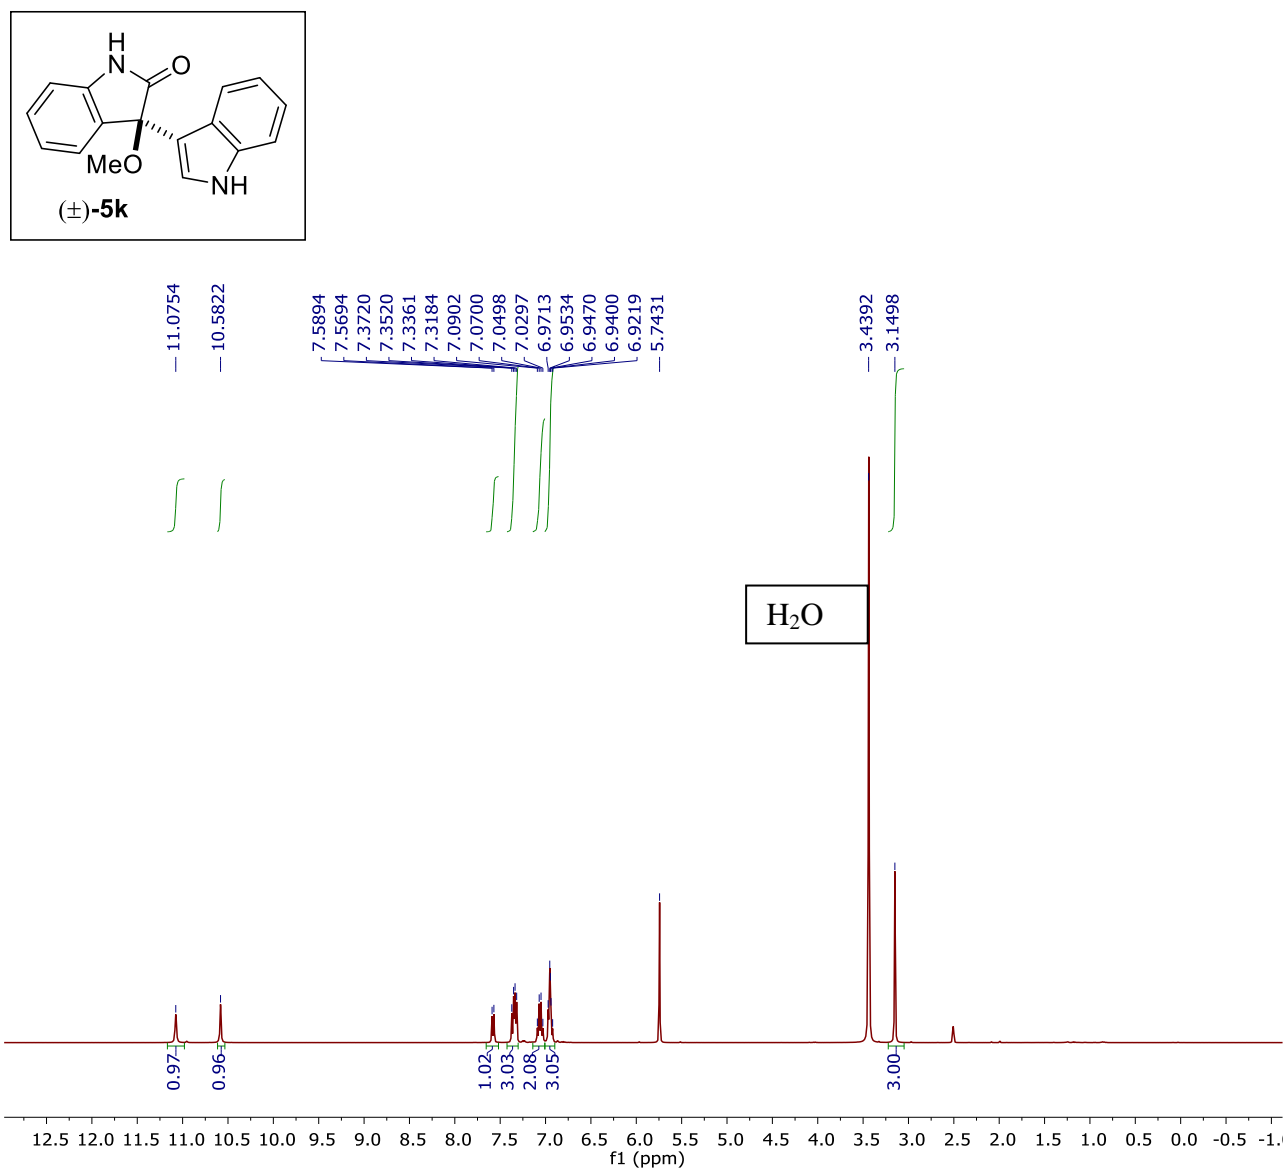

<sup>1</sup>H NMR (500 MHz, DMSO-D<sub>6</sub>) of compound **(±)-5k**



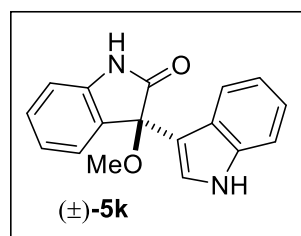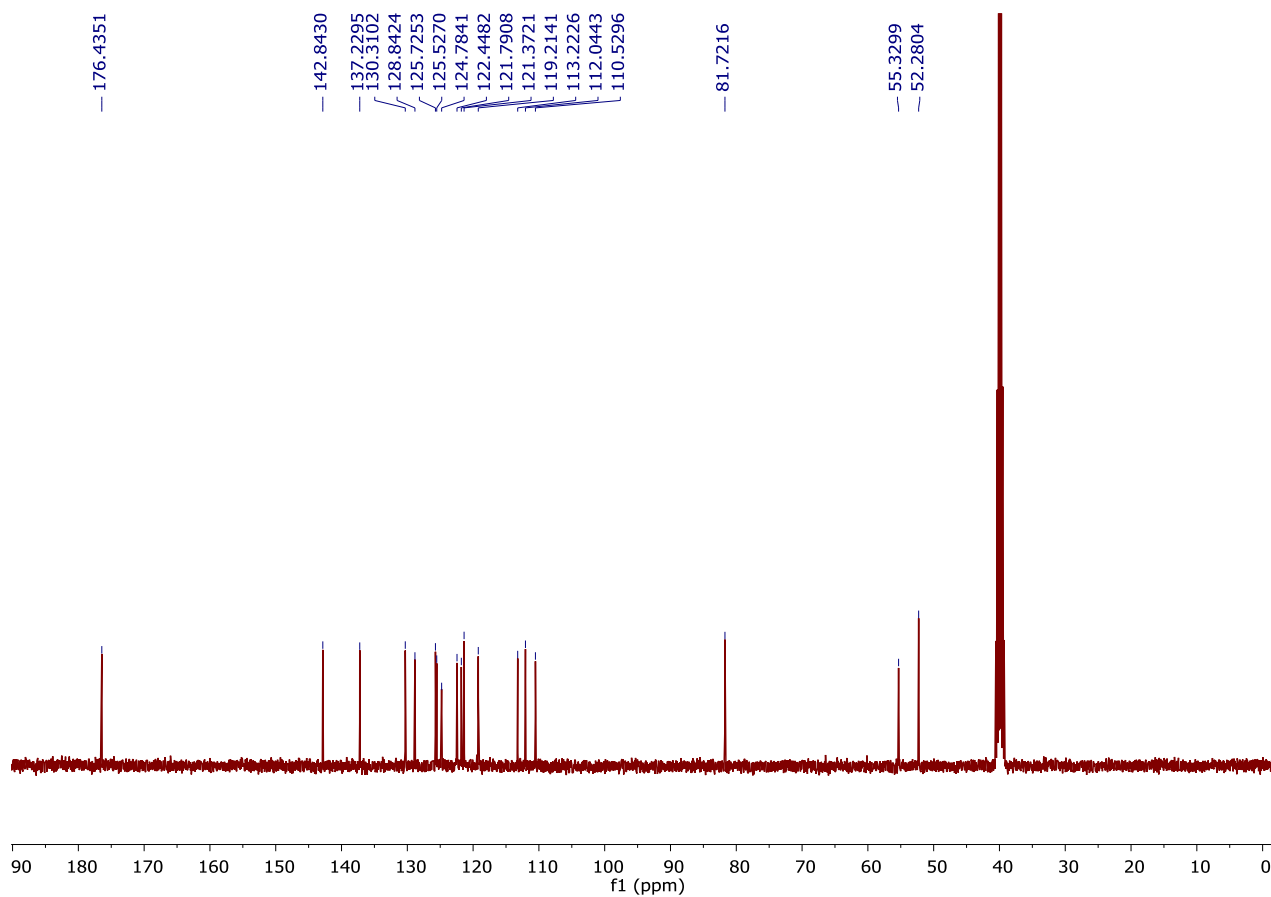

$^{13}\text{C}$  NMR (125 MHz, DMSO- $\text{D}_6$ ) of compound (±)-**5k**

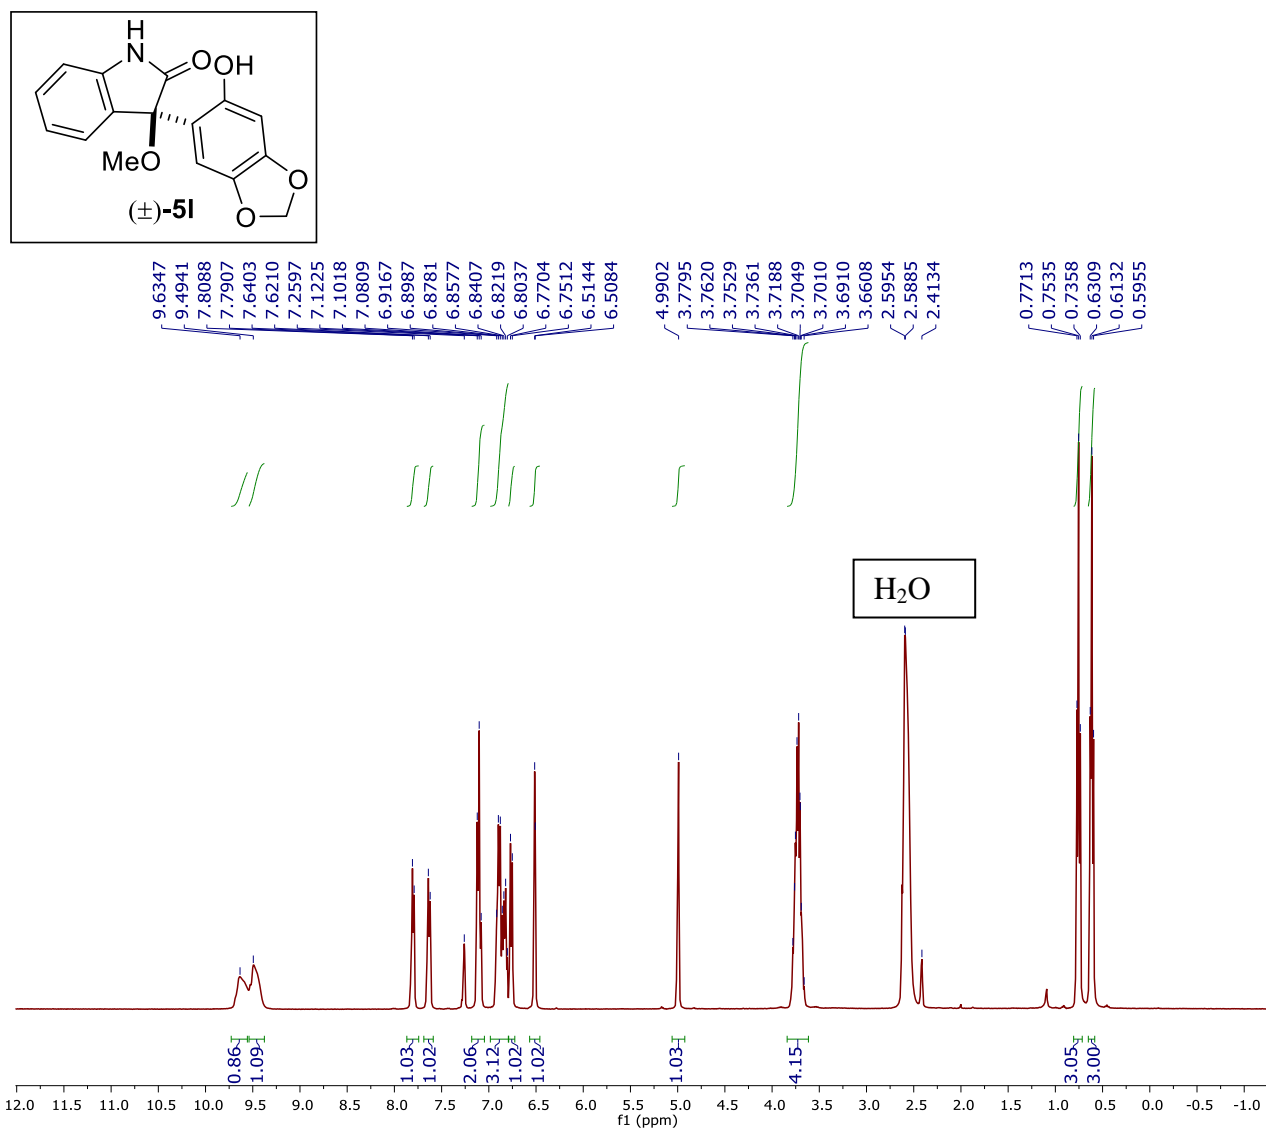

$^1\text{H}$  NMR (500 MHz, DMSO- $\text{D}_6$ ) of compound (±)-51

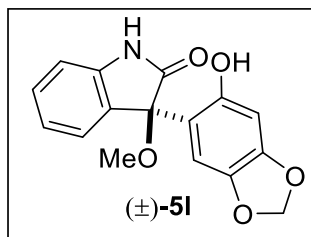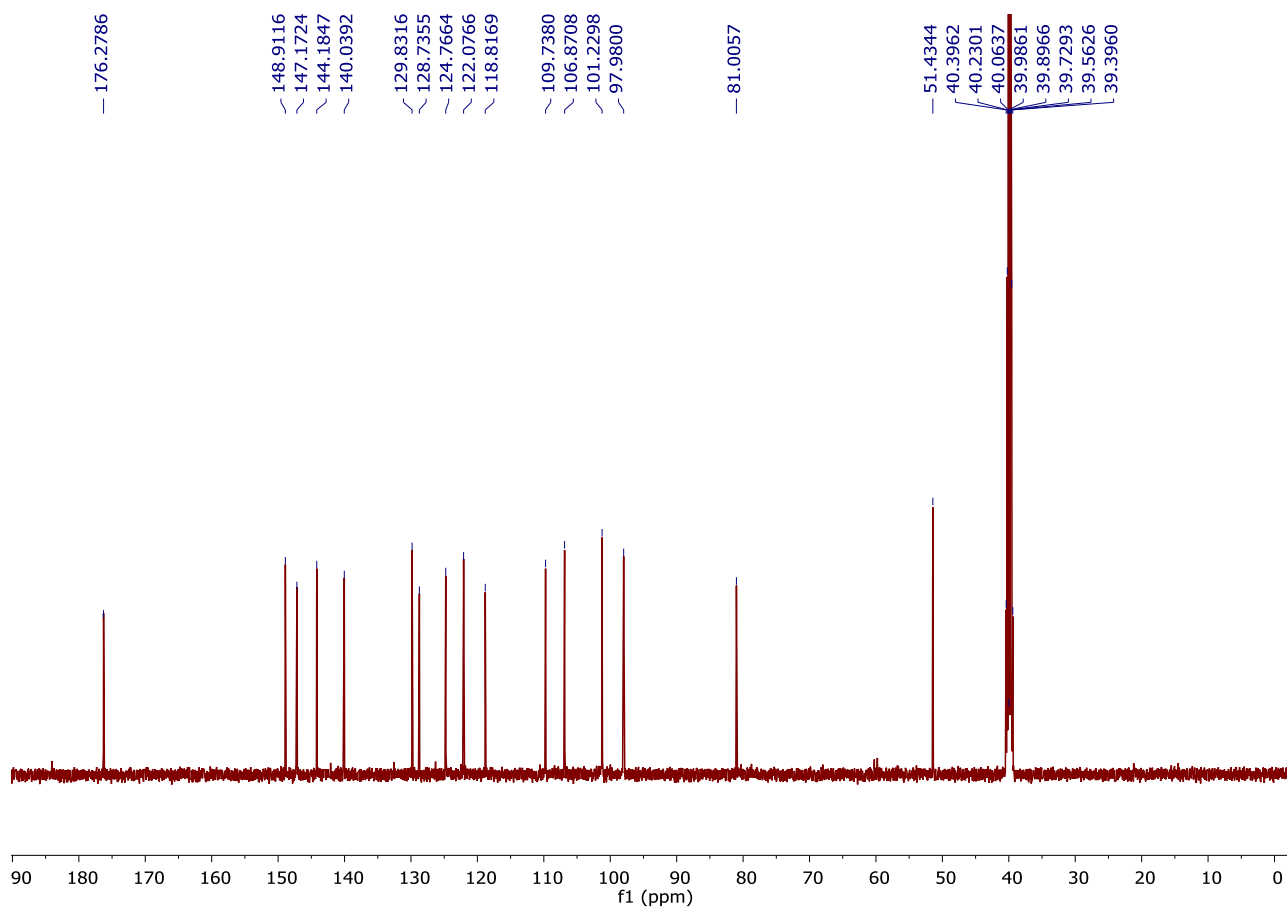

$^{13}\text{C}$  NMR (125 MHz, DMSO- $\text{D}_6$ ) of compound (±)-**51**

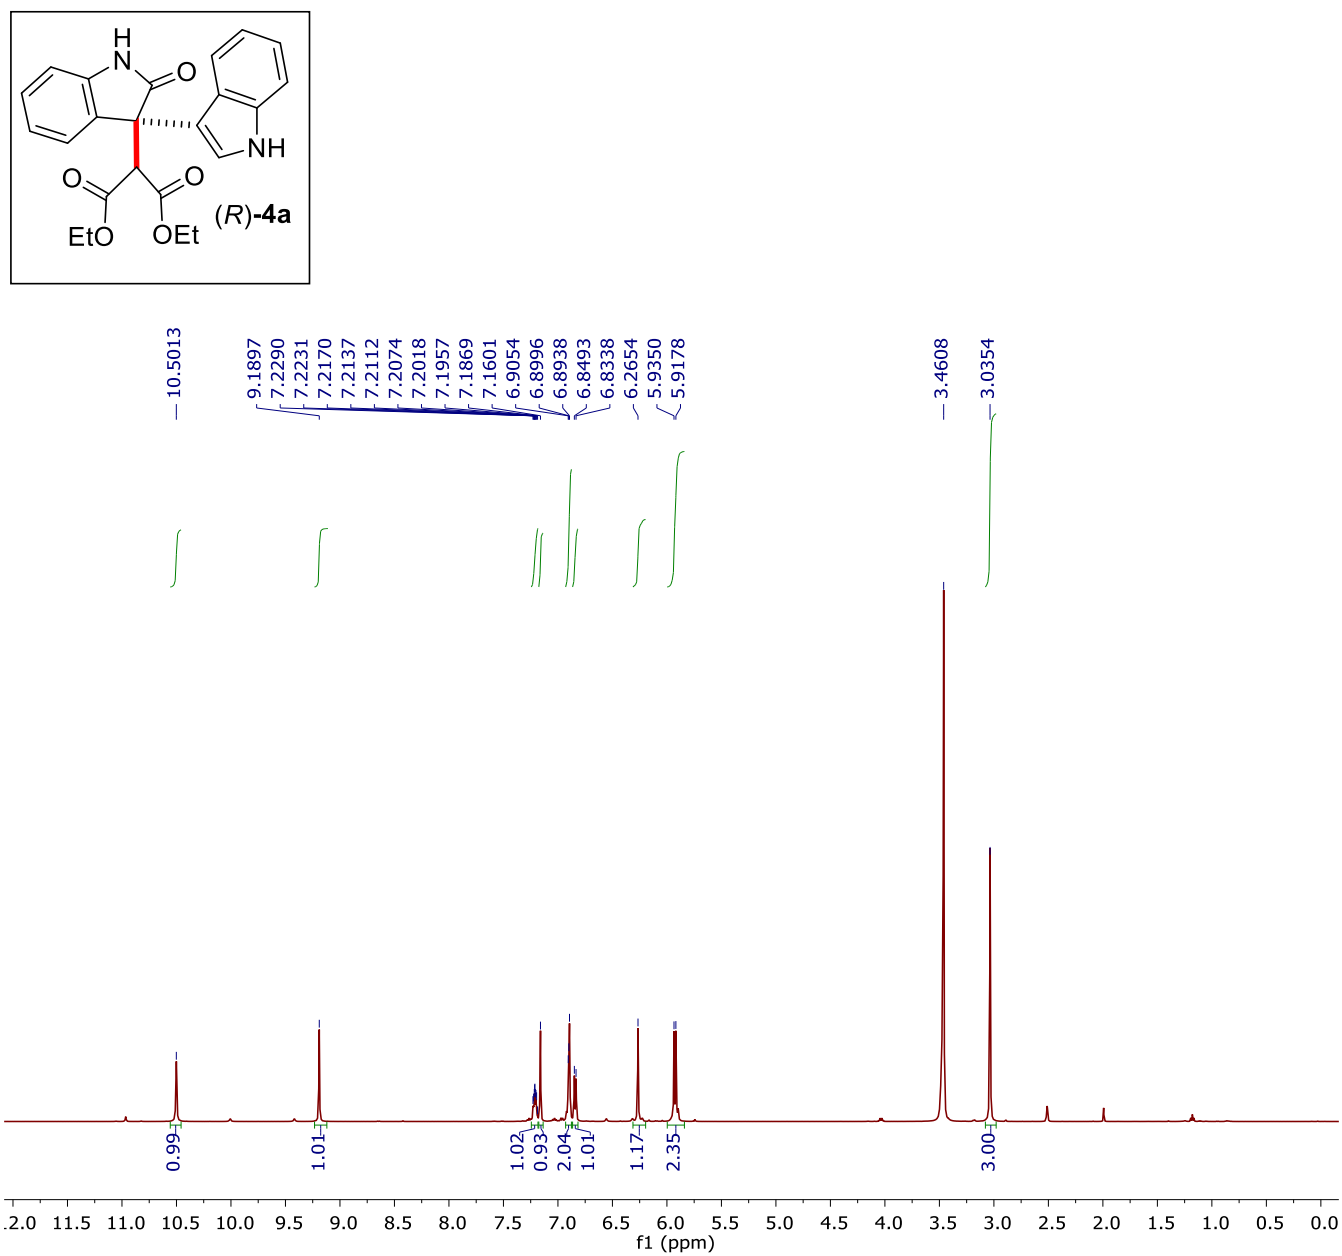

<sup>1</sup>H NMR (400 MHz, 0.5 mL CDCl<sub>3</sub>, 0.1 mL DMSO-D<sub>6</sub>) of compound **(R)-4a**

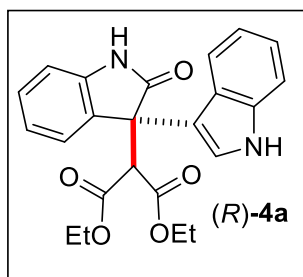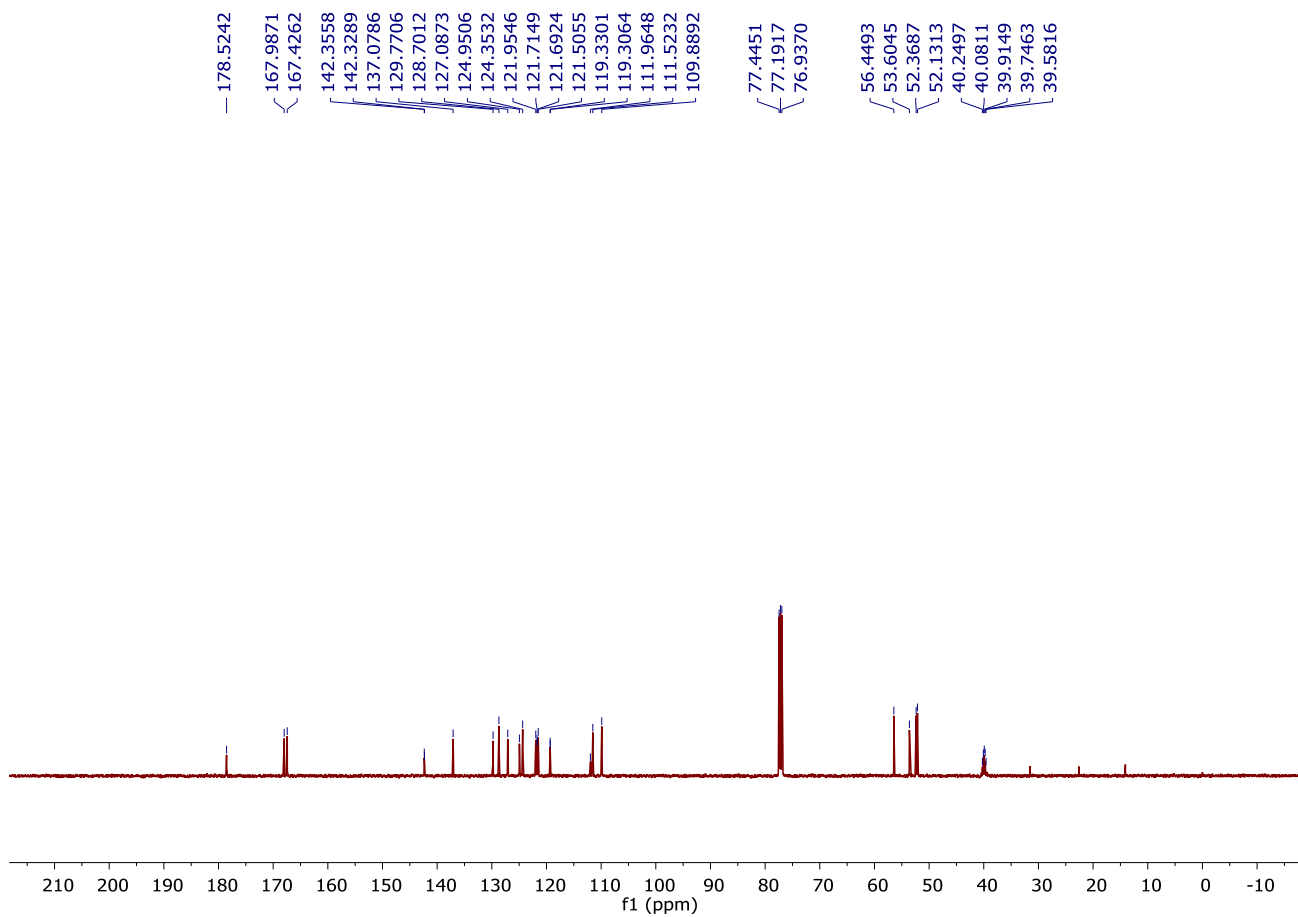

$^{13}\text{C}$  NMR (100 MHz, 0.4 mL  $\text{CDCl}_3$ , 0.1 mL  $\text{DMSO-D}_6$ ) of compound (R)-4a

## Display Report

## Analysis Info

Analysis Name D:\Data\user data\2015\MAY-2015\07-MAY-2015\Dr.A..Bisai-AB-KNB-02-124\_1-B,6\_01\_2405.d  
Method HRLCMS-20 Sept tune wide.m  
Sample Name Dr.A..Bisai-AB-KNB-02-124  
Comment

Acquisition Date 5/7/2015 1:34:17 PM  
Operator RUCHI  
Instrument micrOTOF-Q II 10330

## Acquisition Parameter

|             |            |                       |           |                  |           |
|-------------|------------|-----------------------|-----------|------------------|-----------|
| Source Type | ESI        | Ion Polarity          | Positive  | Set Nebulizer    | 1.2 Bar   |
| Focus       | Not active | Set Capillary         | 4500 V    | Set Dry Heater   | 200 °C    |
| Scan Begin  | 50 m/z     | Set End Plate Offset  | -500 V    | Set Dry Gas      | 7.0 l/min |
| Scan End    | 3000 m/z   | Set Collision Cell RF | 600.0 Vpp | Set Divert Valve | Waste     |

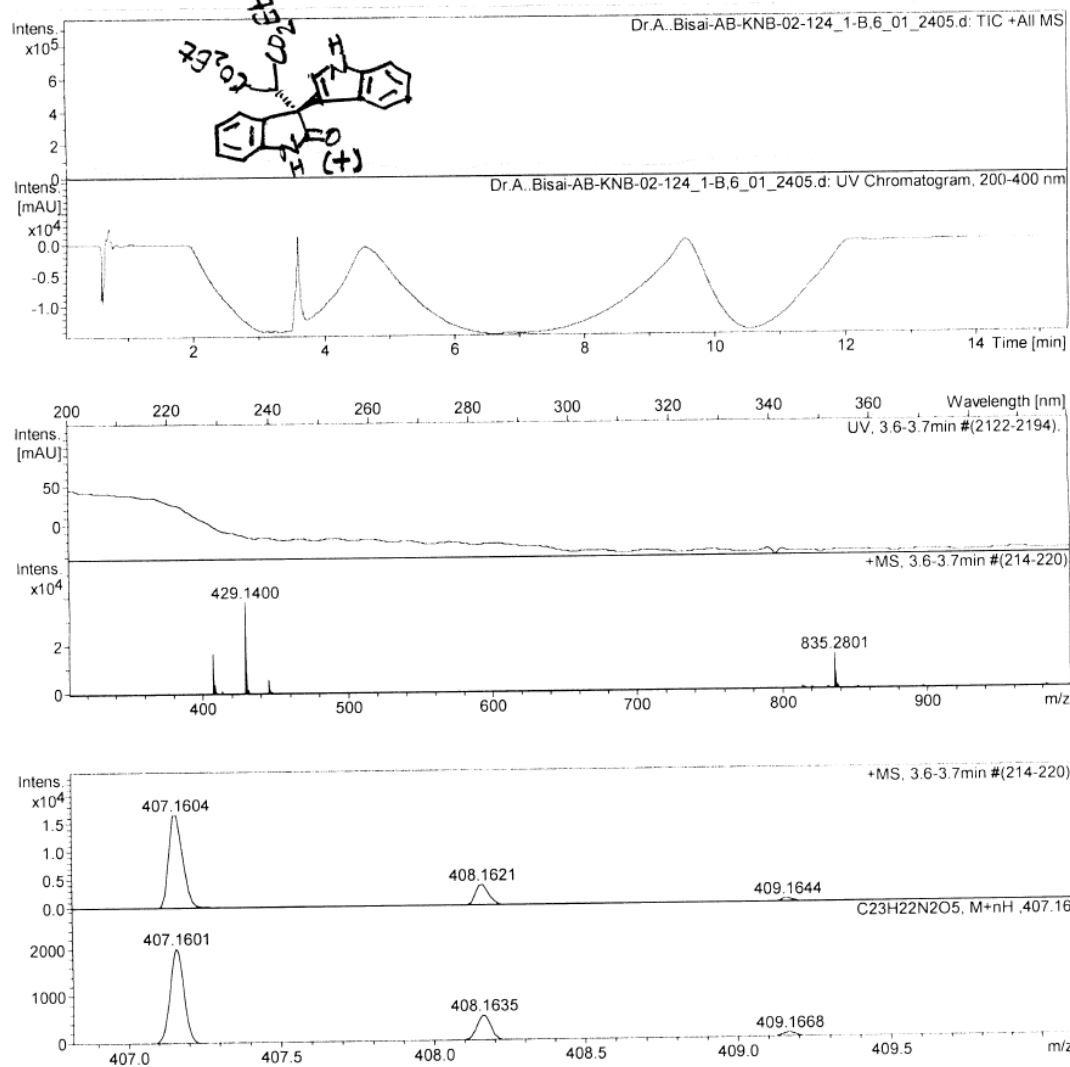

Scanned copy of mass spectrum of (R)-4a

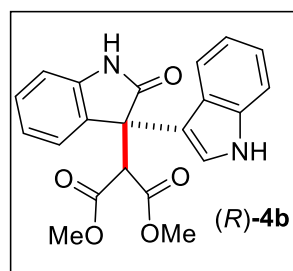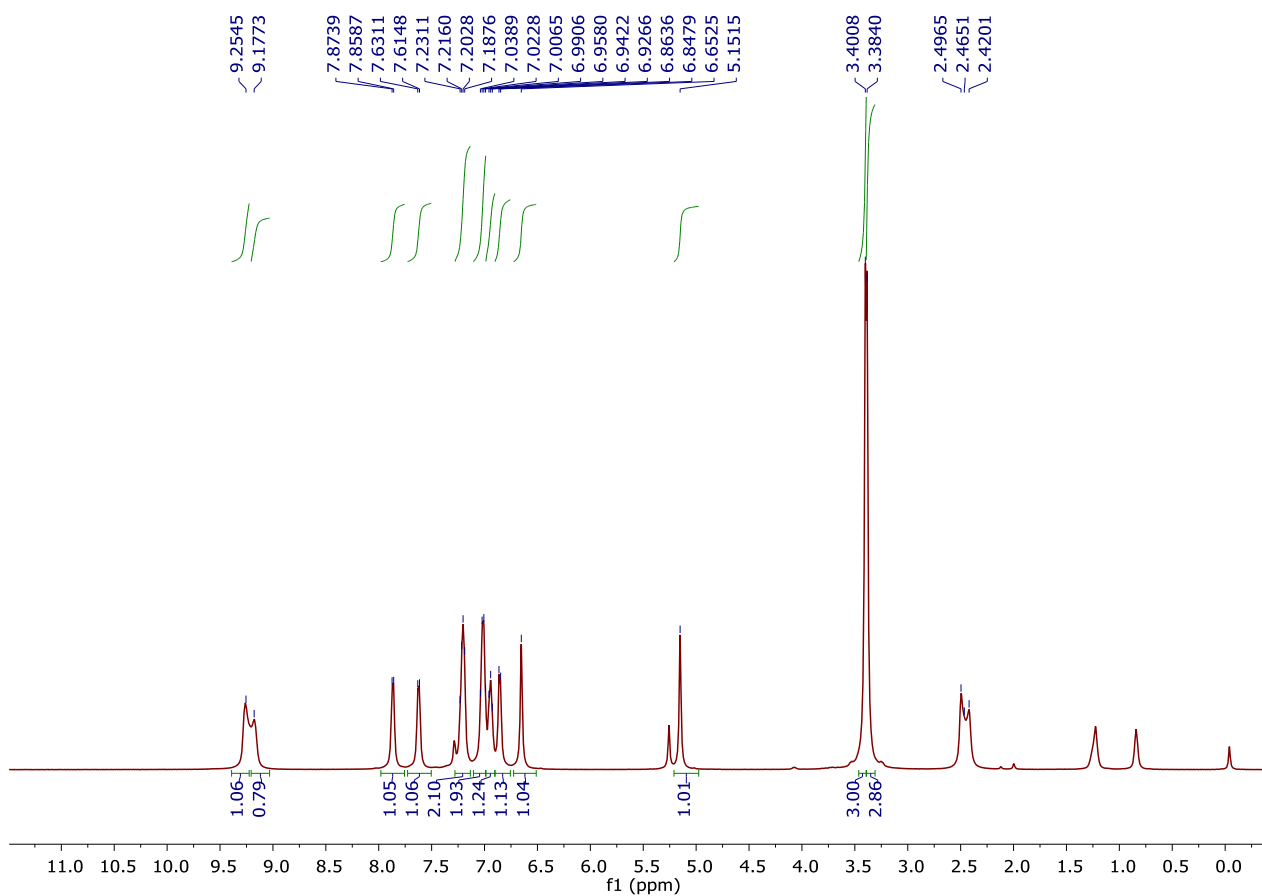

<sup>1</sup>H NMR (500 MHz, 0.4 mL CDCl<sub>3</sub>, 0.1 mL DMSO-D<sub>6</sub>) of compound (R)-4b

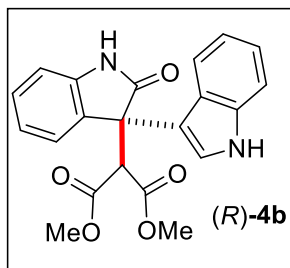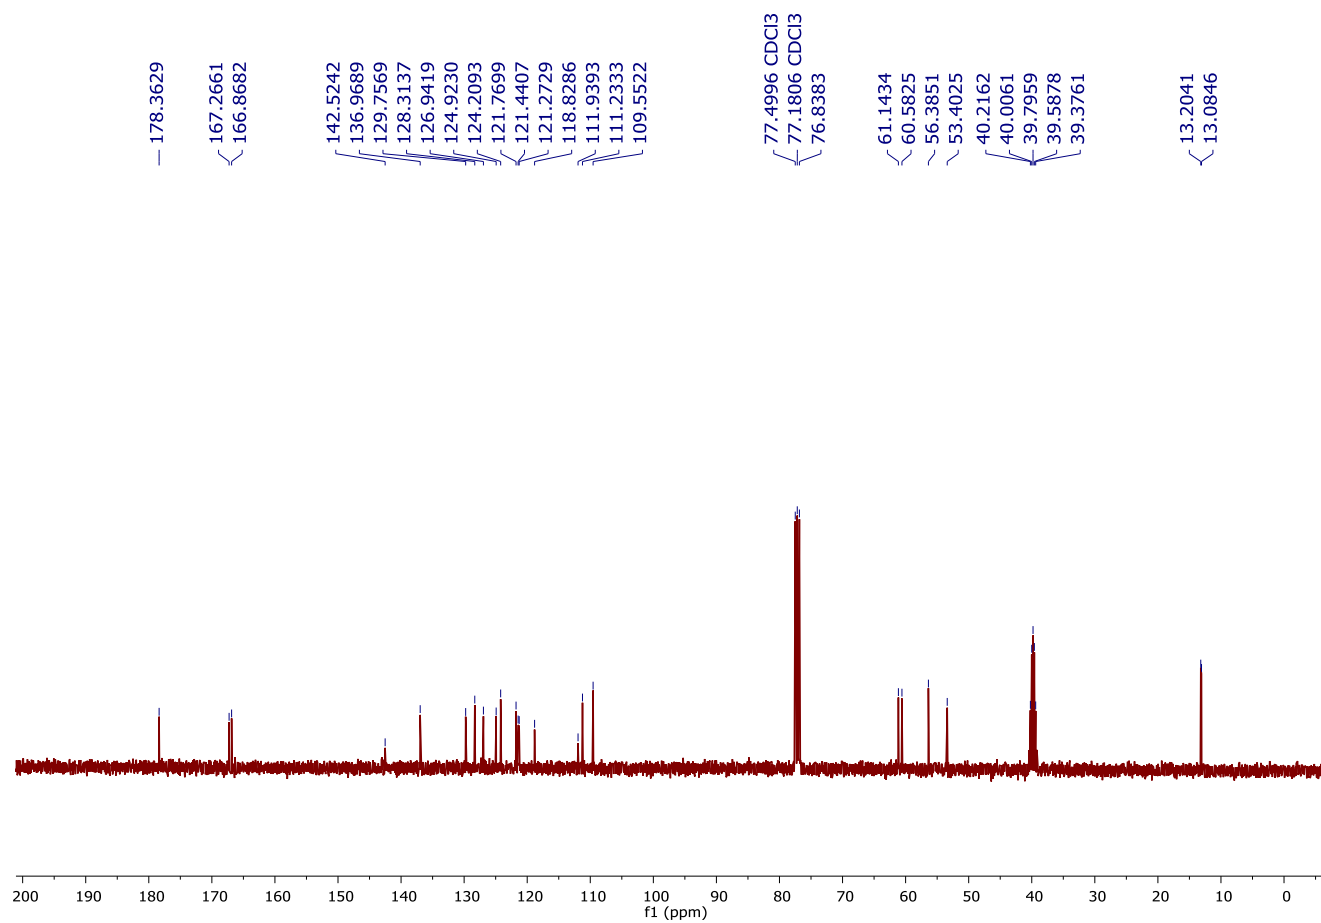

<sup>13</sup>C NMR (100 MHz, 0.4 mL CDCl<sub>3</sub>, 0.1 mL DMSO-D<sub>6</sub>) of compound **(R)-4b**



## Display Report

## Analysis Info

Analysis Name D:\Data\user data\2015\SEPTEMBER-2015\23-SEP-2015\Dr.A.Bisai-AB-KNB-03-006\_1-A,6\_01\_3729.d  
 Method HRLCMS-20 Sept.m  
 Sample Name Dr.A.Bisai-AB-KNB-03-006  
 Comment

Acquisition Date 9/23/2015 12:15:51 PM  
 Operator RUCHI  
 Instrument micrOTOF-Q II 10330

## Acquisition Parameter

|             |          |                       |           |                  |           |
|-------------|----------|-----------------------|-----------|------------------|-----------|
| Source Type | ESI      | Ion Polarity          | Positive  | Set Nebulizer    | 1.2 Bar   |
| Focus       | Active   | Set Capillary         | 4500 V    | Set Dry Heater   | 200 °C    |
| Scan Begin  | 50 m/z   | Set End Plate Offset  | -500 V    | Set Dry Gas      | 7.0 l/min |
| Scan End    | 3000 m/z | Set Collision Cell RF | 130.0 Vpp | Set Divert Valve | Waste     |

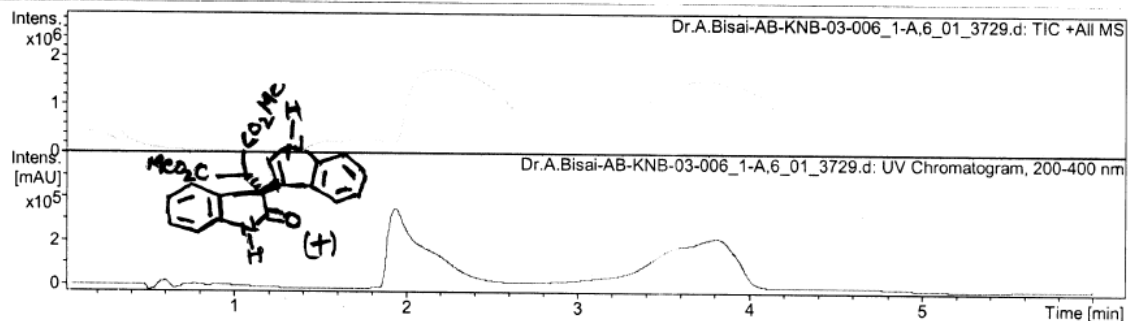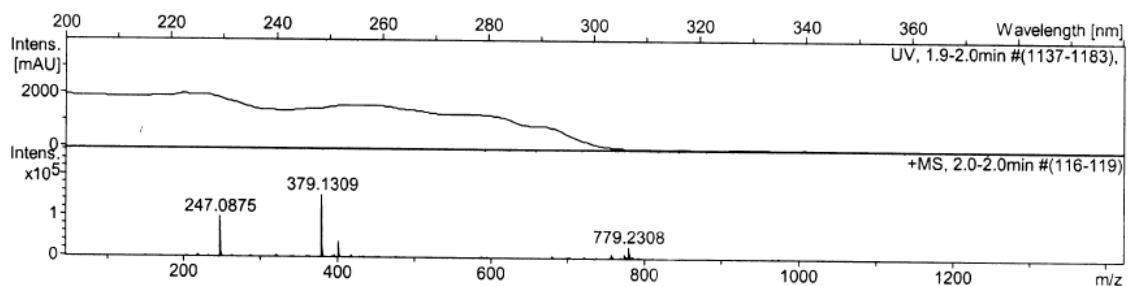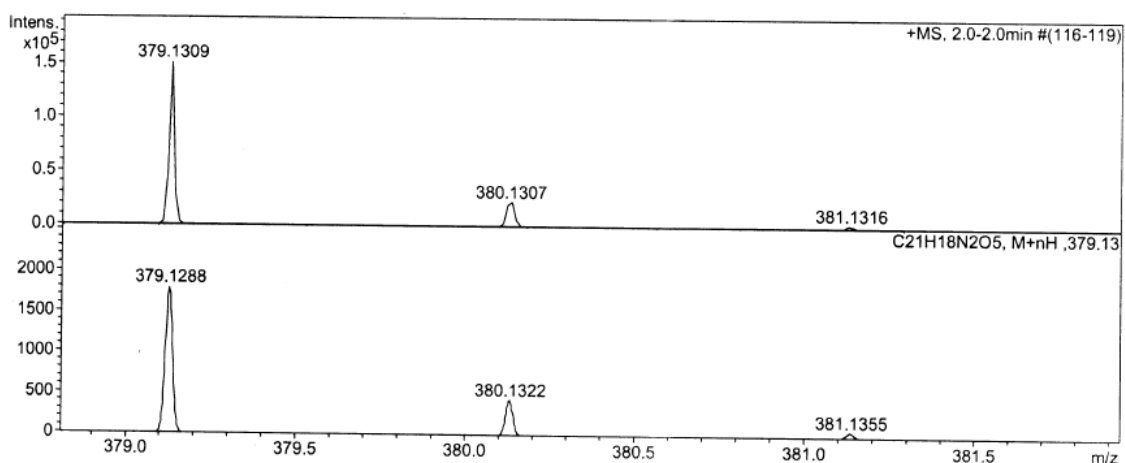

Bruker Compass DataAnalysis 4.0

printed: 9/23/2015 12:47:06 PM

Page 1 of 1

Scanned copy of mass spectrum of (R)-4b

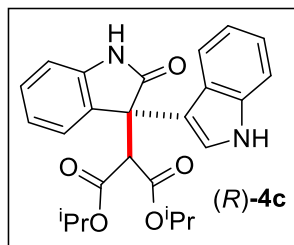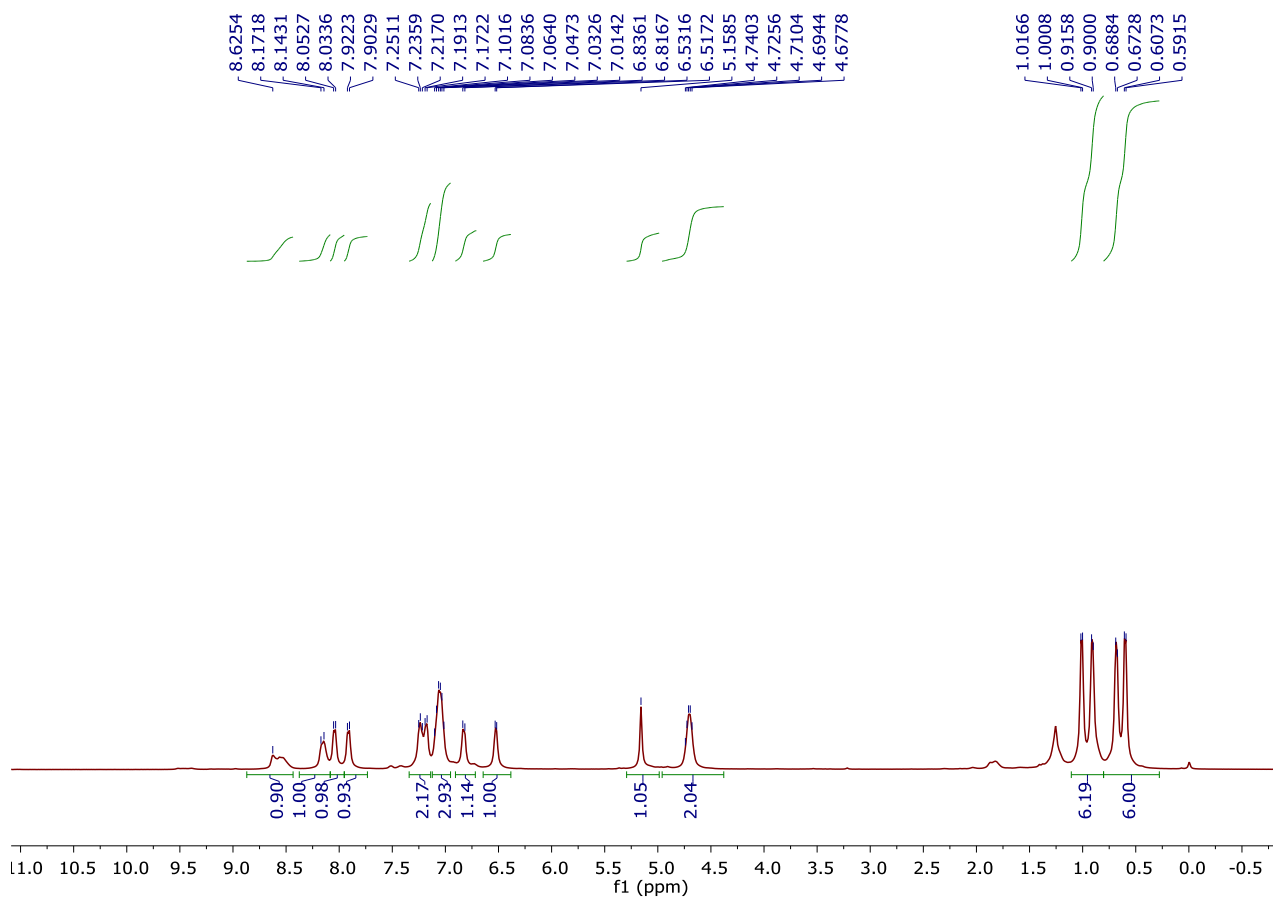

$^1\text{H}$  NMR (400 MHz,  $\text{CDCl}_3$ ) of compound (R)-4c

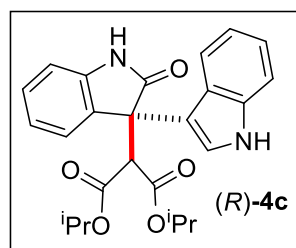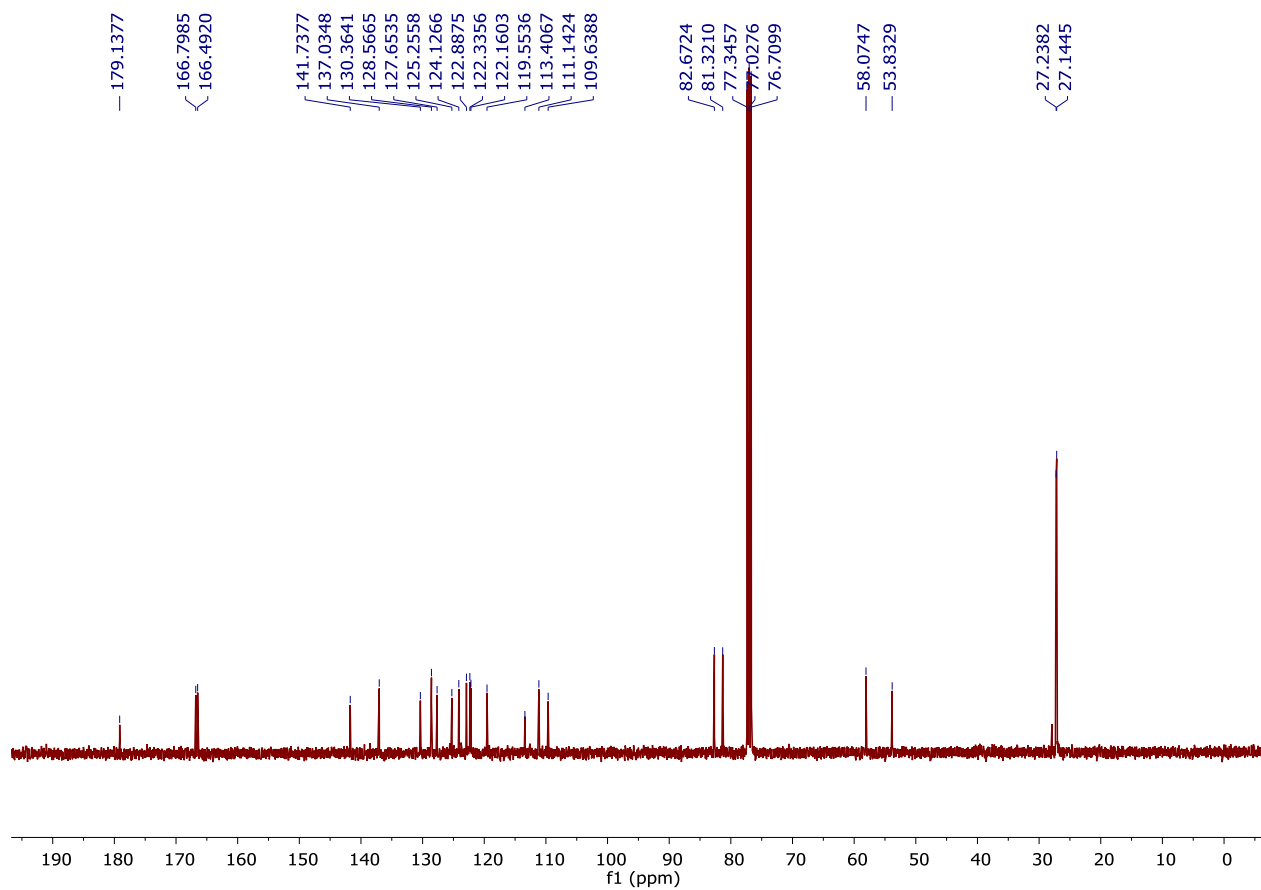

$^{13}\text{C}$  NMR (100 MHz,  $\text{CDCl}_3$ ) of compound (R)-4c

## Display Report

## Analysis Info

Analysis Name D:\Data\user data\2015\SEPTEMBER-2015\23-SEP-2015\Dr.A.Bisai-AB-KNB-03-002\_1-A,5\_01\_3728.d  
 Method HRLCMS-20 Sept tune wide.m  
 Sample Name Dr.A.Bisai-AB-KNB-03-002  
 Comment

Acquisition Date 9/23/2015 12:03:37 PM  
 Operator RUCHI  
 Instrument micrOTOF-Q II 10330

## Acquisition Parameter

|             |            |                       |           |                  |           |
|-------------|------------|-----------------------|-----------|------------------|-----------|
| Source Type | ESI        | Ion Polarity          | Positive  | Set Nebulizer    | 1.2 Bar   |
| Focus       | Not active | Set Capillary         | 4500 V    | Set Dry Heater   | 200 °C    |
| Scan Begin  | 50 m/z     | Set End Plate Offset  | -500 V    | Set Dry Gas      | 7.0 l/min |
| Scan End    | 3000 m/z   | Set Collision Cell RF | 600.0 Vpp | Set Divert Valve | Waste     |

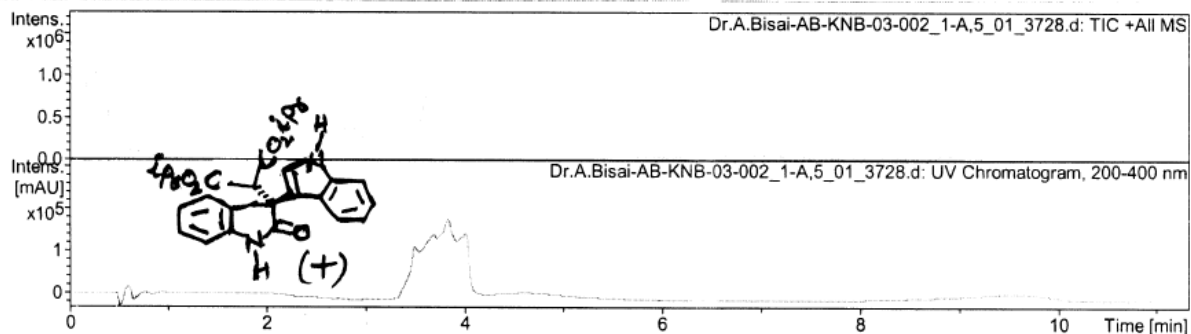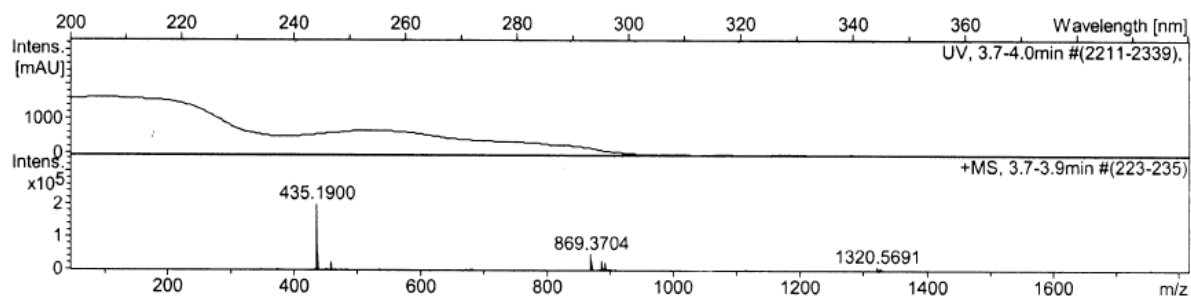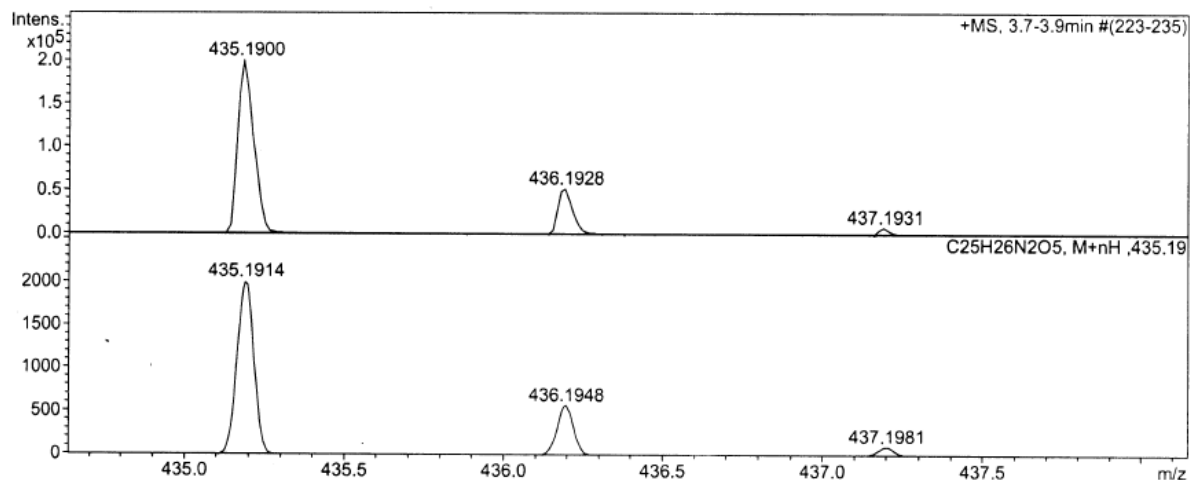

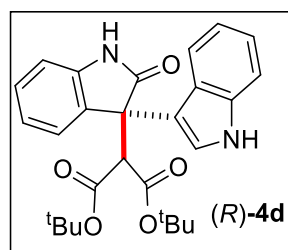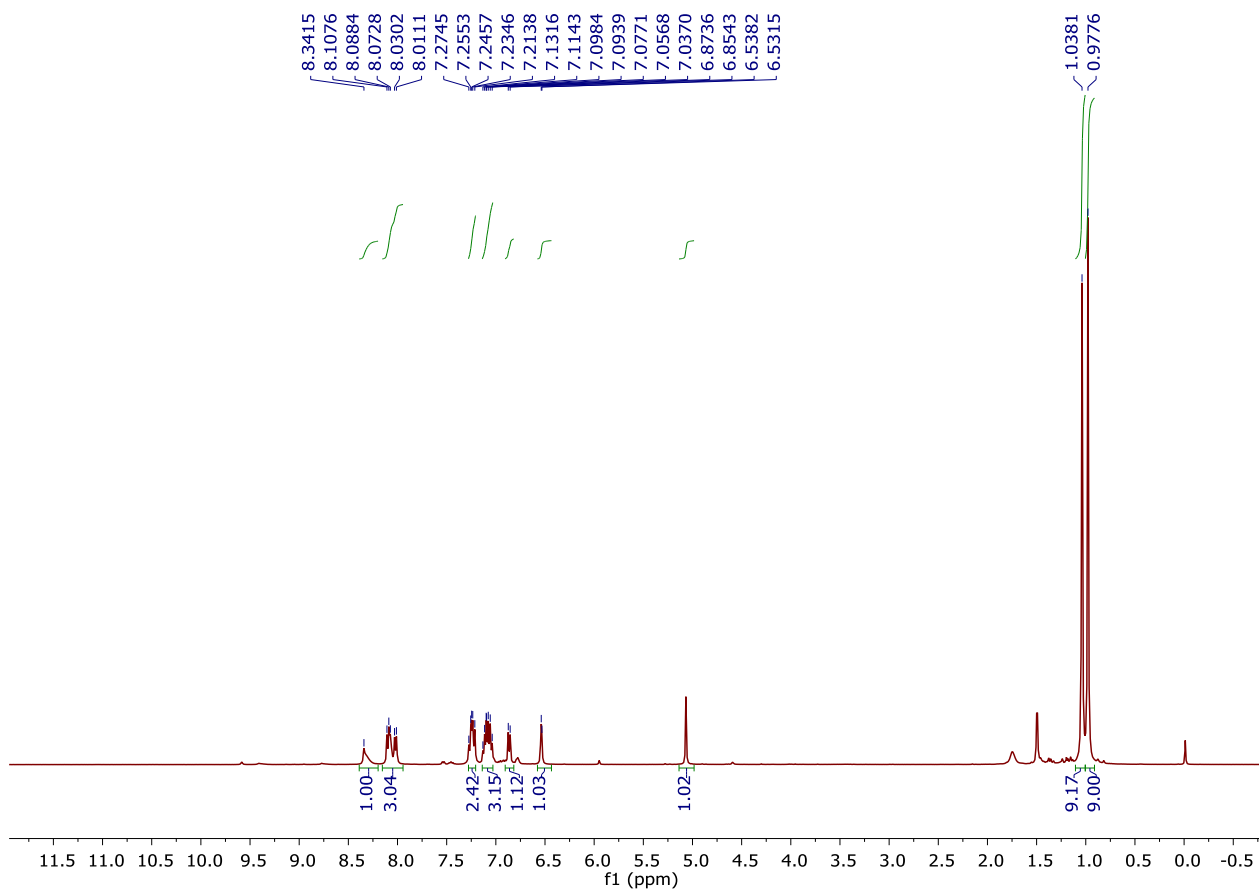

$^1\text{H}$  NMR (400 MHz,  $\text{CDCl}_3$ ) of compound (R)-4d

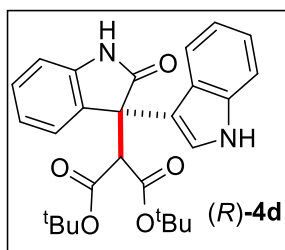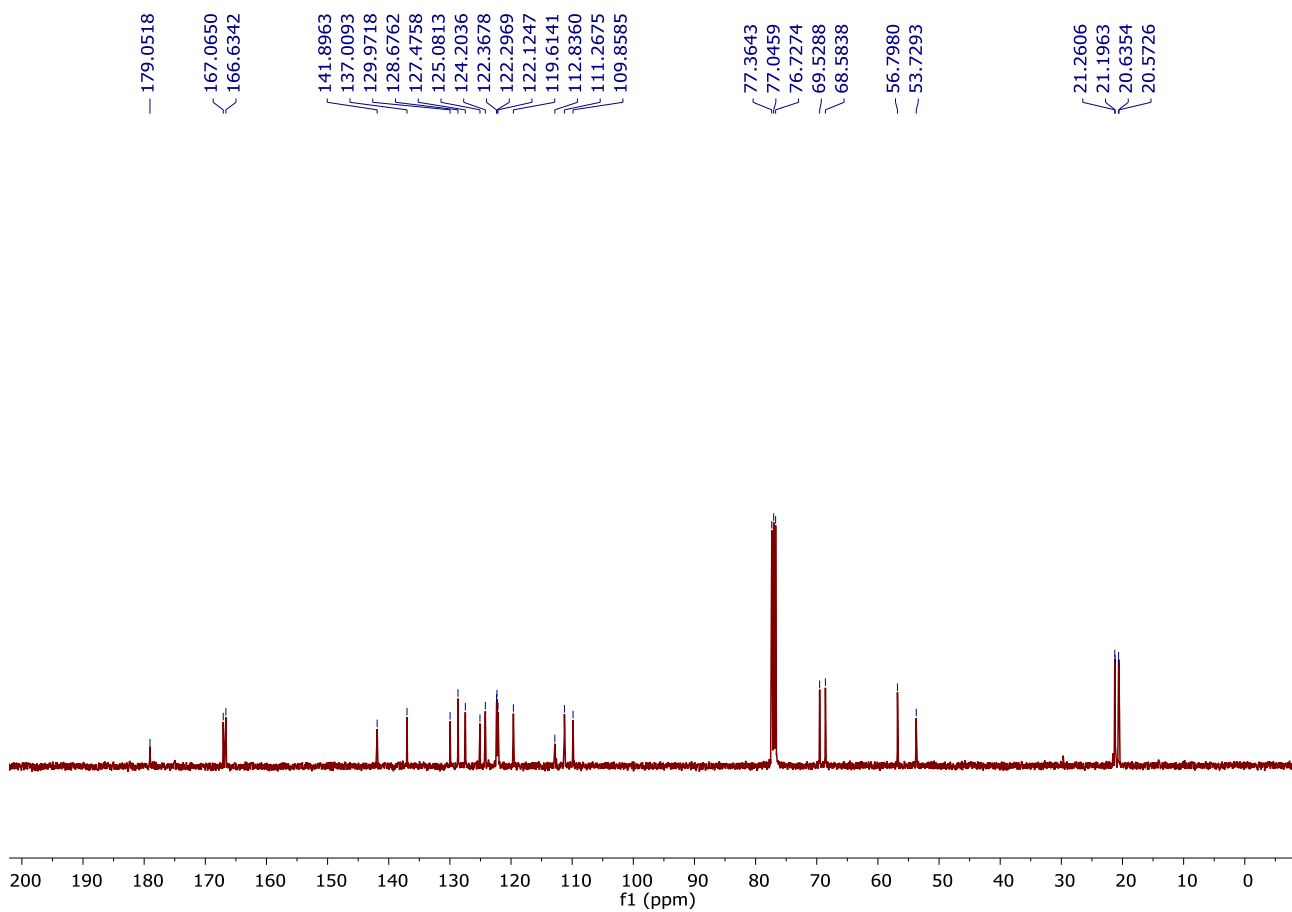

<sup>13</sup>C NMR (100 MHz, CDCl<sub>3</sub>) of compound (R)-4d

## Display Report

## Analysis Info

Analysis Name D:\Data\user data\2015\AUGEST-2015\24-AUG-2015\Dr.A.Bisai-AB-KNB-02-254\_1-A,7\_01\_3457.d  
 Method HRLCMS-20 Sept tune wide.m  
 Sample Name Dr.A.Bisai-AB-KNB-02-254  
 Comment

Acquisition Date 8/24/2015 2:40:20 PM  
 Operator RUCHI  
 Instrument micrOTOF-Q II 10330

## Acquisition Parameter

|             |            |                       |           |                  |           |
|-------------|------------|-----------------------|-----------|------------------|-----------|
| Source Type | ESI        | Ion Polarity          | Positive  | Set Nebulizer    | 1.2 Bar   |
| Focus       | Not active | Set Capillary         | 4500 V    | Set Dry Heater   | 200 °C    |
| Scan Begin  | 50 m/z     | Set End Plate Offset  | -500 V    | Set Dry Gas      | 7.0 l/min |
| Scan End    | 3000 m/z   | Set Collision Cell RF | 600.0 Vpp | Set Divert Valve | Waste     |

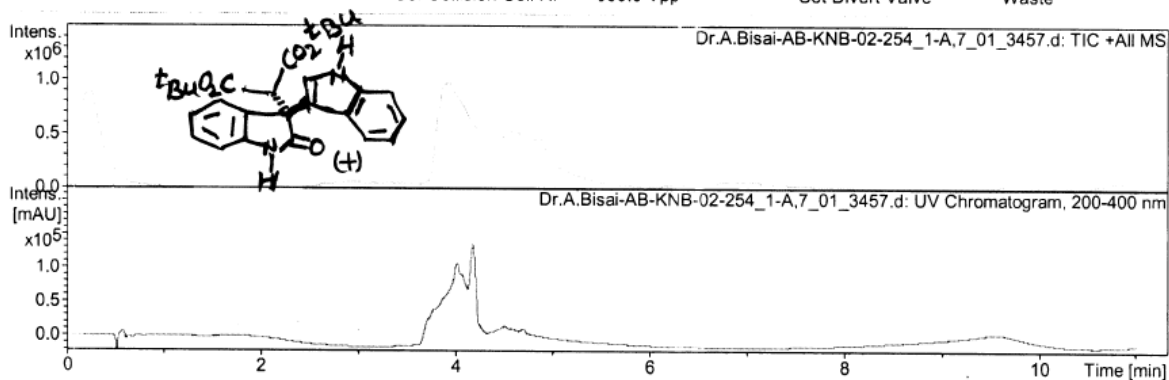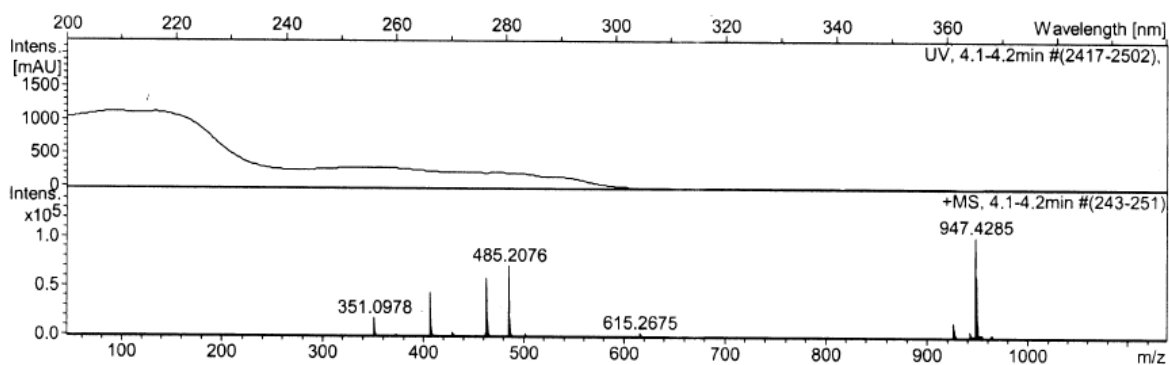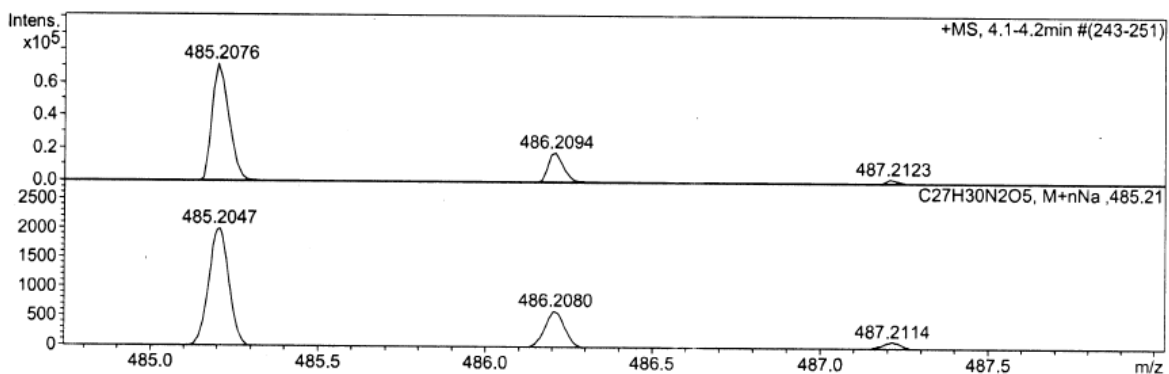

Bruker Compass DataAnalysis 4.0

printed: 8/24/2015 3:35:52 PM

Page 1 of 1

Scanned copy of mass spectrum of (R)-4d

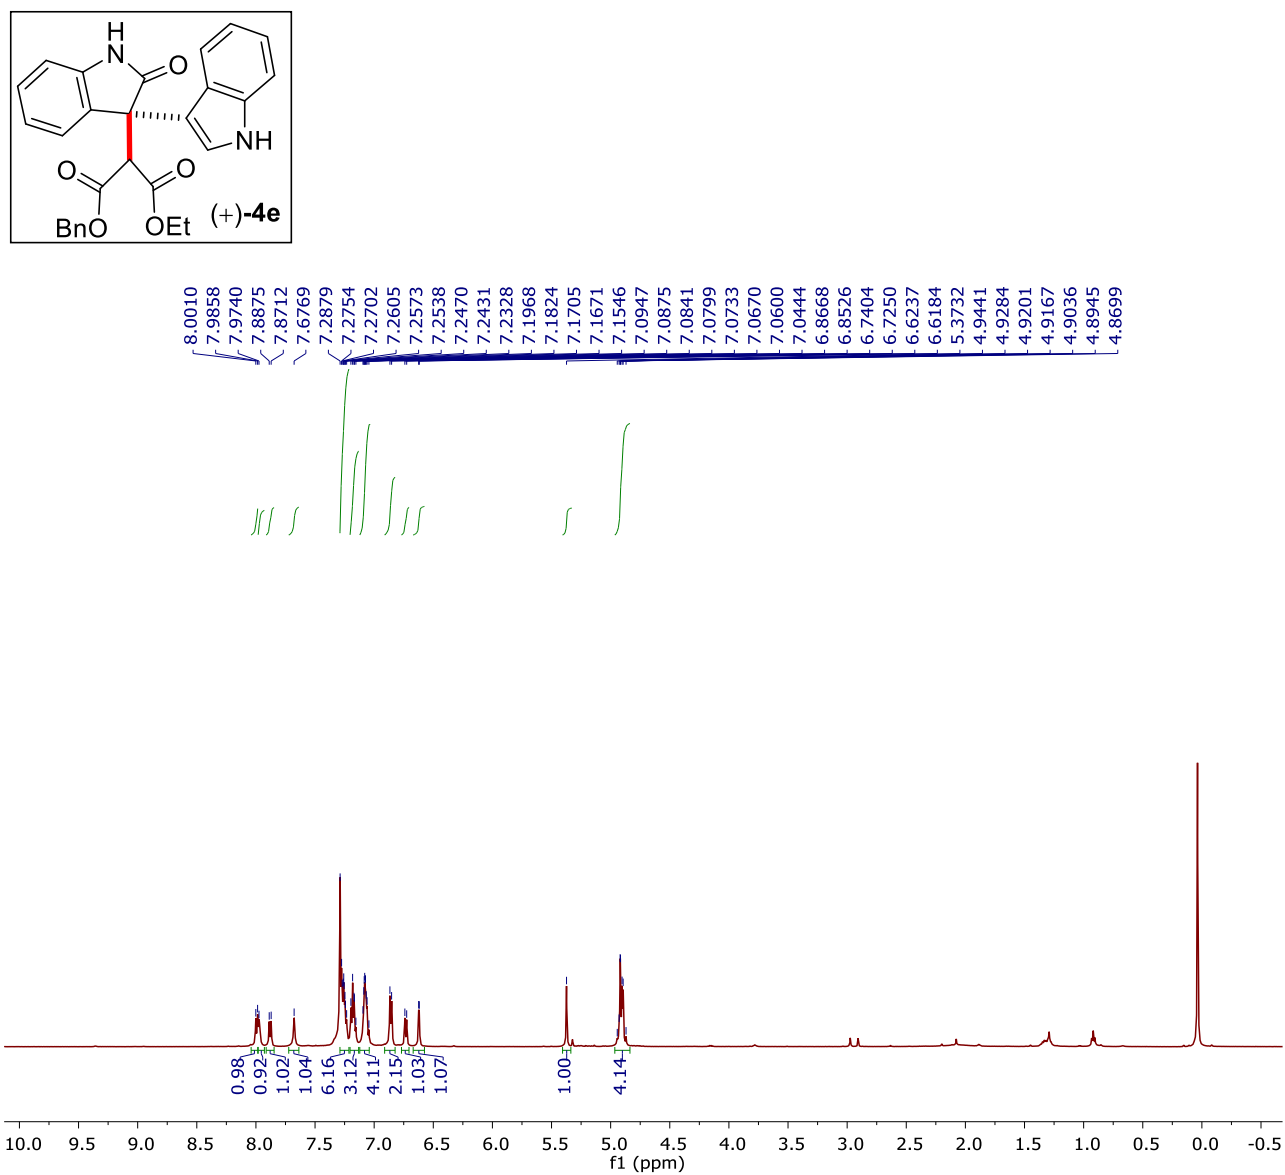 $^1\text{H}$  NMR (400 MHz, DMSO- $\text{D}_6$ ) of compound (+)-**4e**



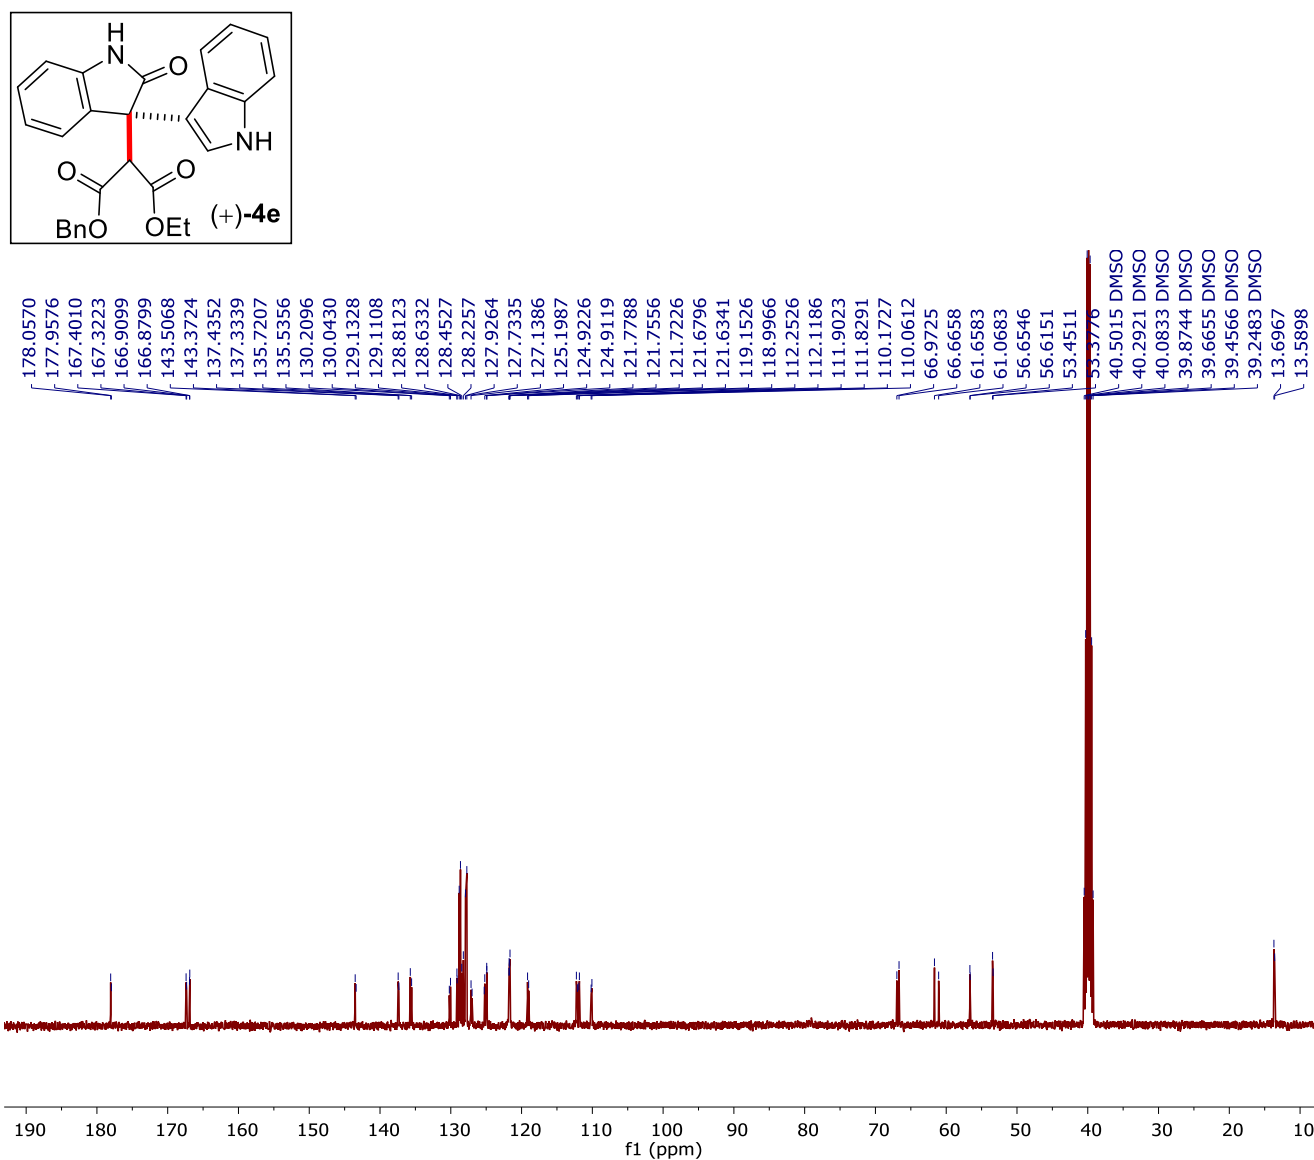

$^{13}\text{C}$  NMR (100 MHz, DMSO- $\text{D}_6$ ) of compound (+)-4e

## Display Report

## Analysis Info

Analysis Name D:\Data\user data\2015\SEPTEMBER-2015\09-SEPT-2015\Dr.A.Bisai-AB-KNB-02-255-2\_1-A,8\_01\_3612.d  
Method HRLCMS-20 Sept tune wide.m  
Sample Name Dr.A.Bisai-AB-KNB-02-255-2  
Comment

Acquisition Date 9/9/2015 2:57:01 PM  
Operator RUCHI  
Instrument micrOTOF-Q II 10330

## Acquisition Parameter

|             |            |                       |           |                  |           |
|-------------|------------|-----------------------|-----------|------------------|-----------|
| Source Type | ESI        | Ion Polarity          | Positive  | Set Nebulizer    | 1.2 Bar   |
| Focus       | Not active | Set Capillary         | 4500 V    | Set Dry Heater   | 200 °C    |
| Scan Begin  | 50 m/z     | Set End Plate Offset  | -500 V    | Set Dry Gas      | 7.0 l/min |
| Scan End    | 3000 m/z   | Set Collision Cell RF | 600.0 Vpp | Set Divert Valve | Waste     |

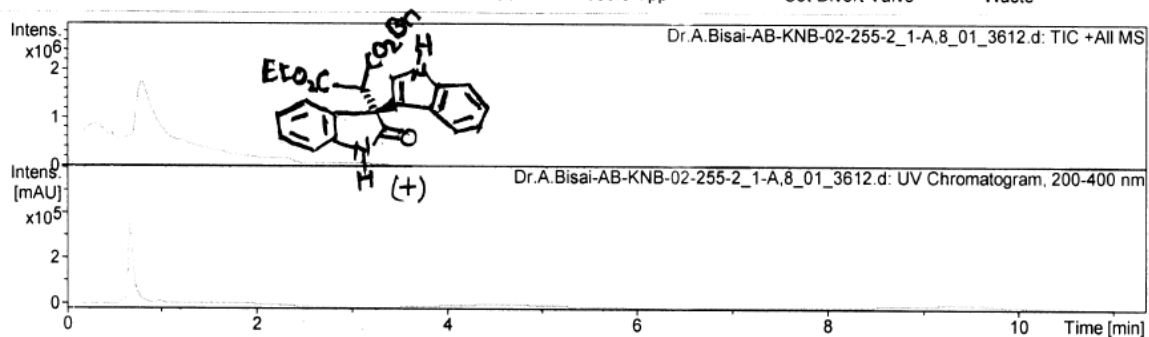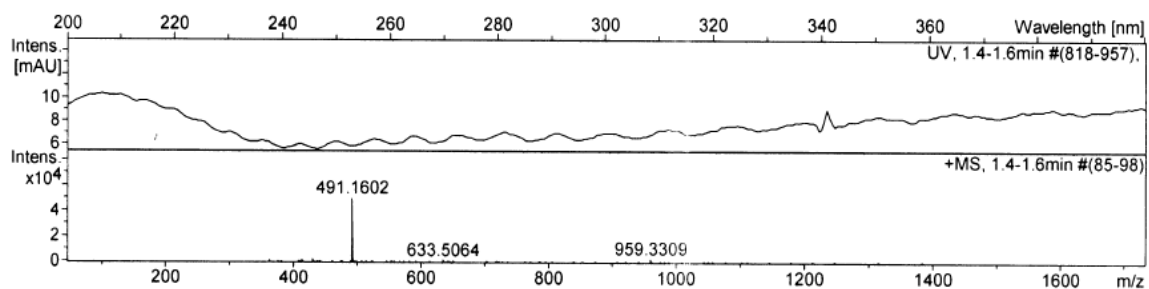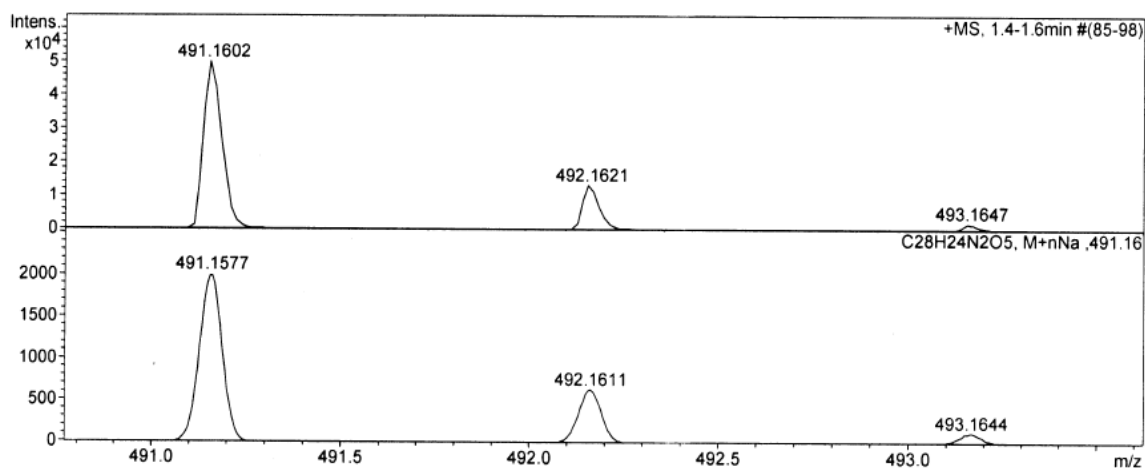

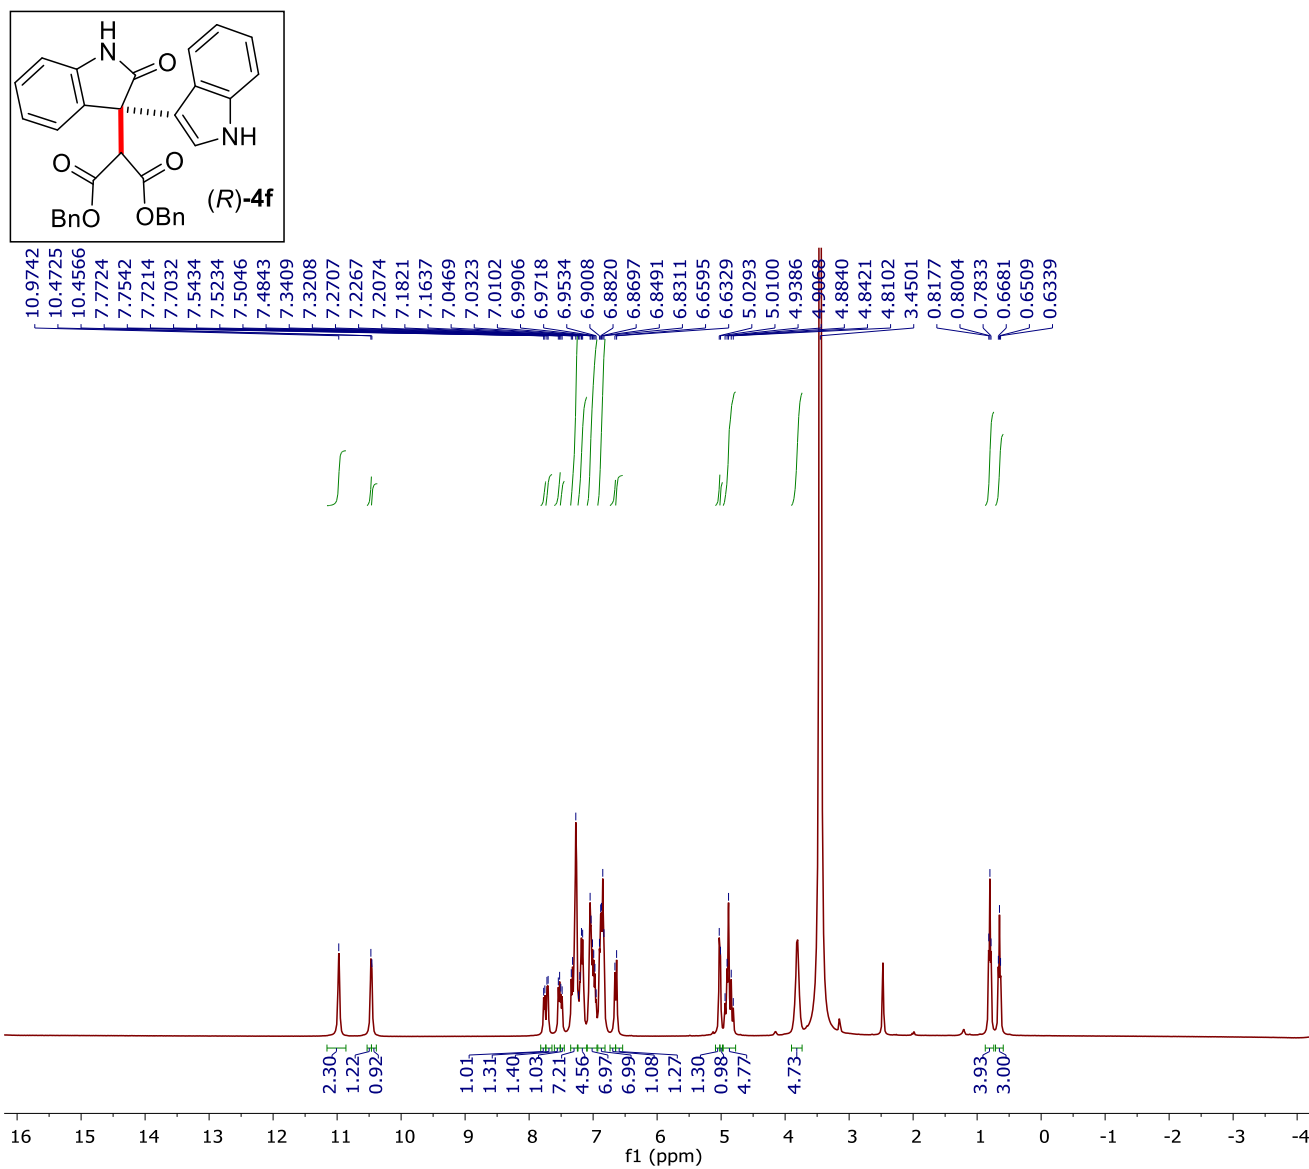 $^1\text{H}$  NMR (500 MHz,  $\text{CDCl}_3$ ) of compound (*R*)-**4f**

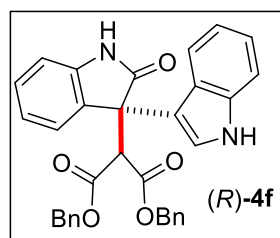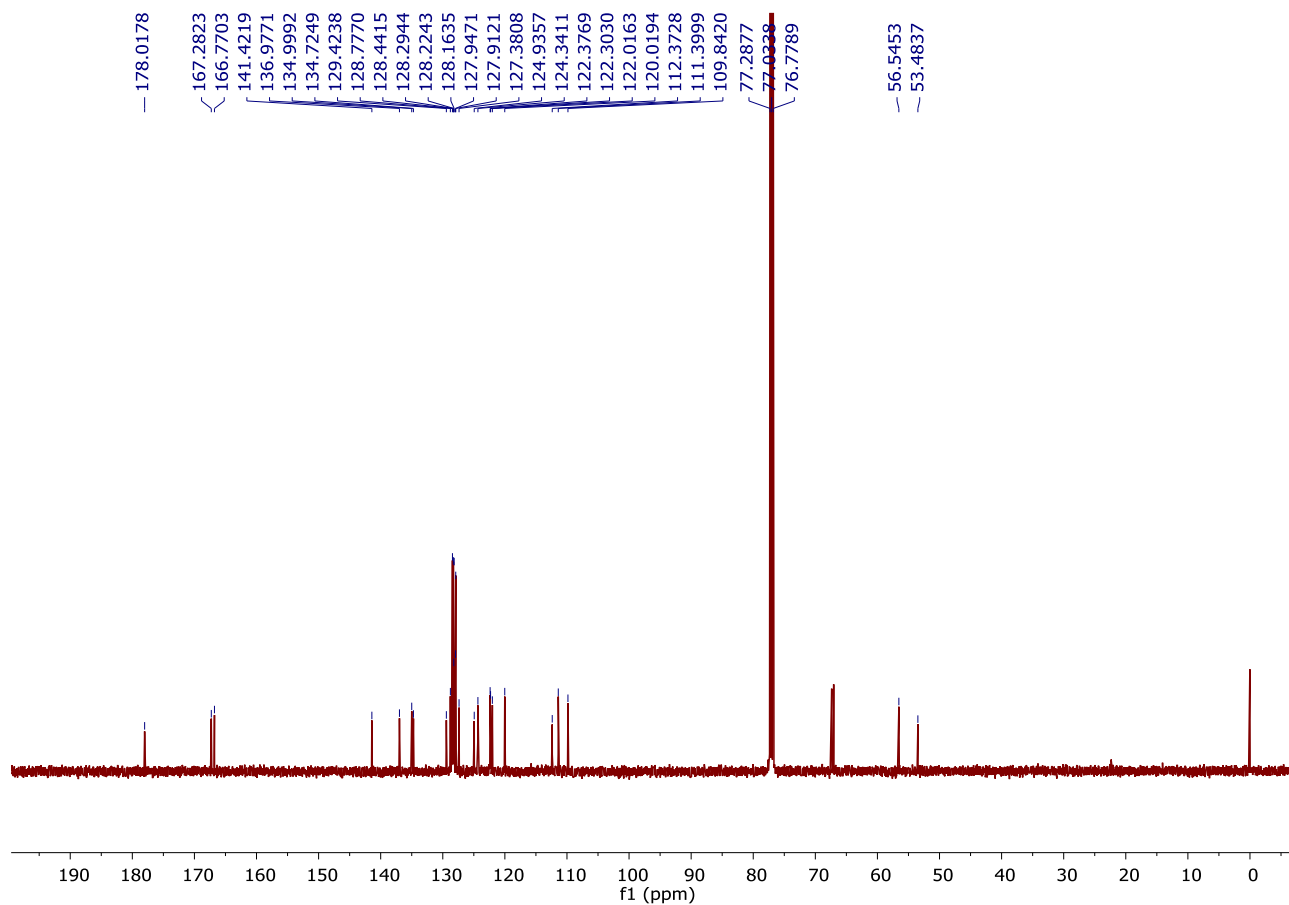

$^{13}\text{C}$  NMR (500 MHz,  $\text{CDCl}_3$ ) of compound **(R)-4f**

## Display Report

## Analysis Info

Analysis Name D:\Data\user data\2015\AUGEST-2015\24-AUG-2015\Dr.A.Bisai-AB-KNB-02-248\_1-A,8\_01\_3458.d  
Method HRLCMS-20 Sept tune wide.m  
Sample Name Dr.A.Bisai-AB-KNB-02-248  
Comment

Acquisition Date 8/24/2015 2:52:29 PM  
Operator RUCHI  
Instrument micrOTOF-Q II 10330

## Acquisition Parameter

|             |            |                       |           |                  |           |
|-------------|------------|-----------------------|-----------|------------------|-----------|
| Source Type | ESI        | Ion Polarity          | Positive  | Set Nebulizer    | 1.2 Bar   |
| Focus       | Not active | Set Capillary         | 4500 V    | Set Dry Heater   | 200 °C    |
| Scan Begin  | 50 m/z     | Set End Plate Offset  | -500 V    | Set Dry Gas      | 7.0 l/min |
| Scan End    | 3000 m/z   | Set Collision Cell RF | 600.0 Vpp | Set Divert Valve | Waste     |

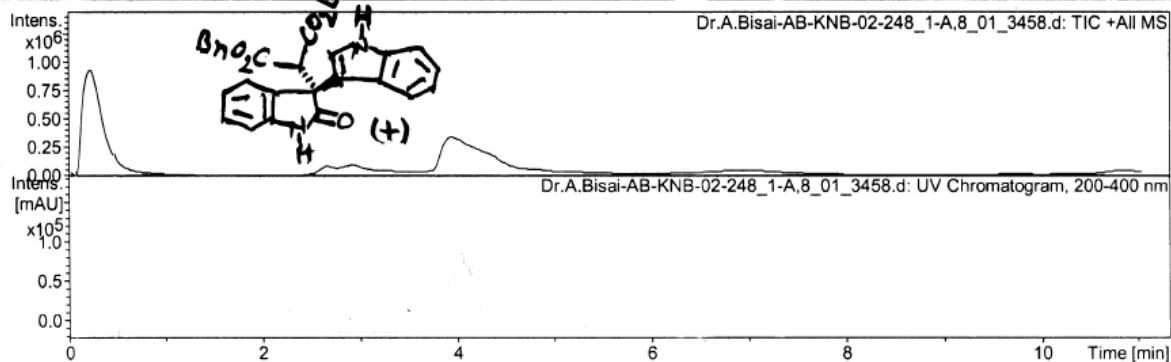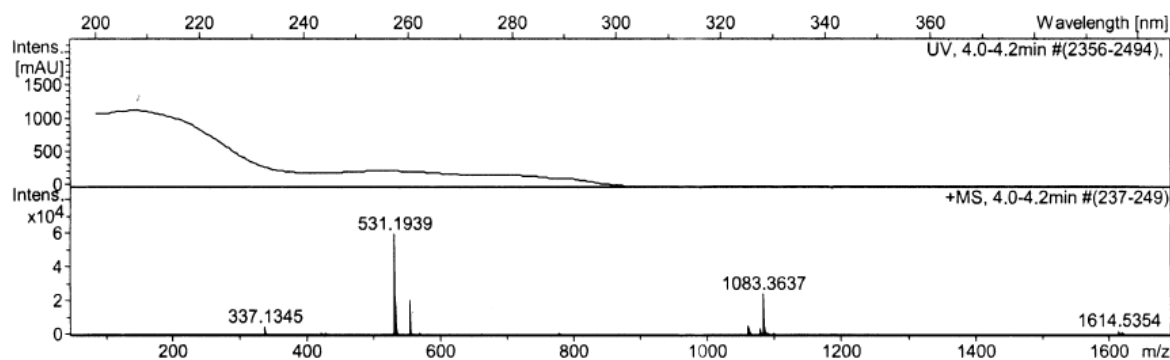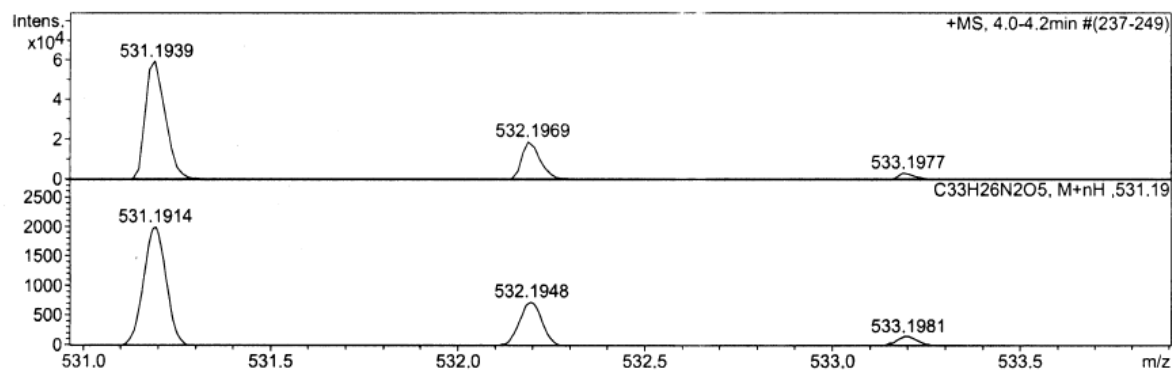

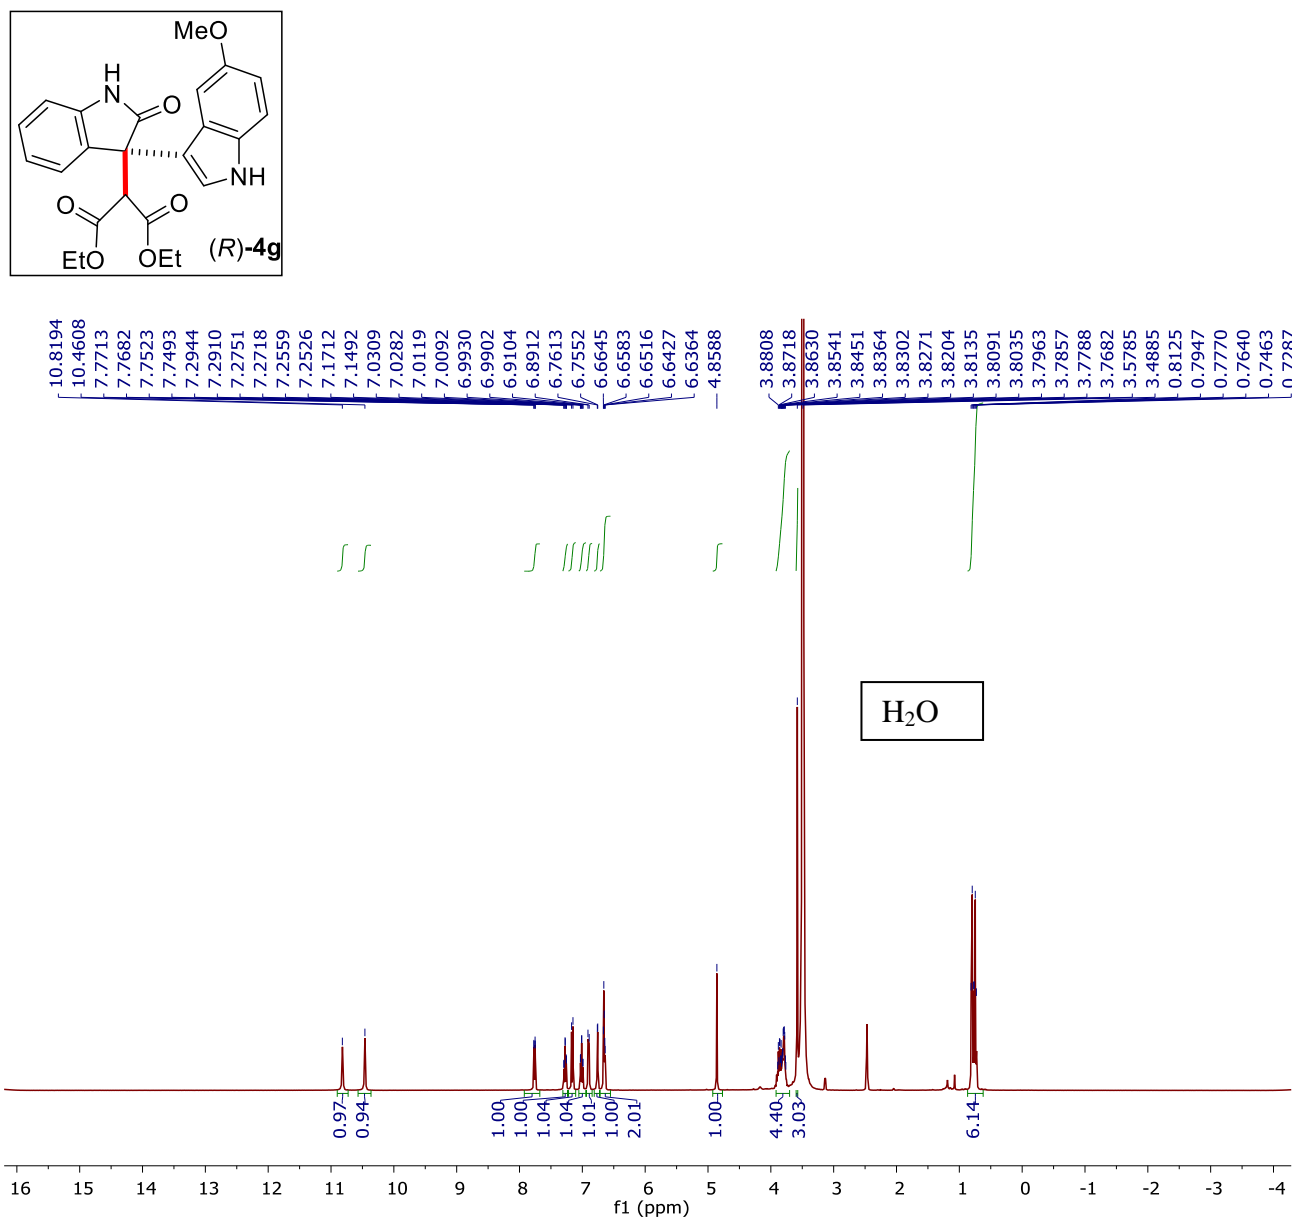<sup>1</sup>H NMR (400 MHz, DMSO-D<sub>6</sub>) of compound (*R*)-**4g**

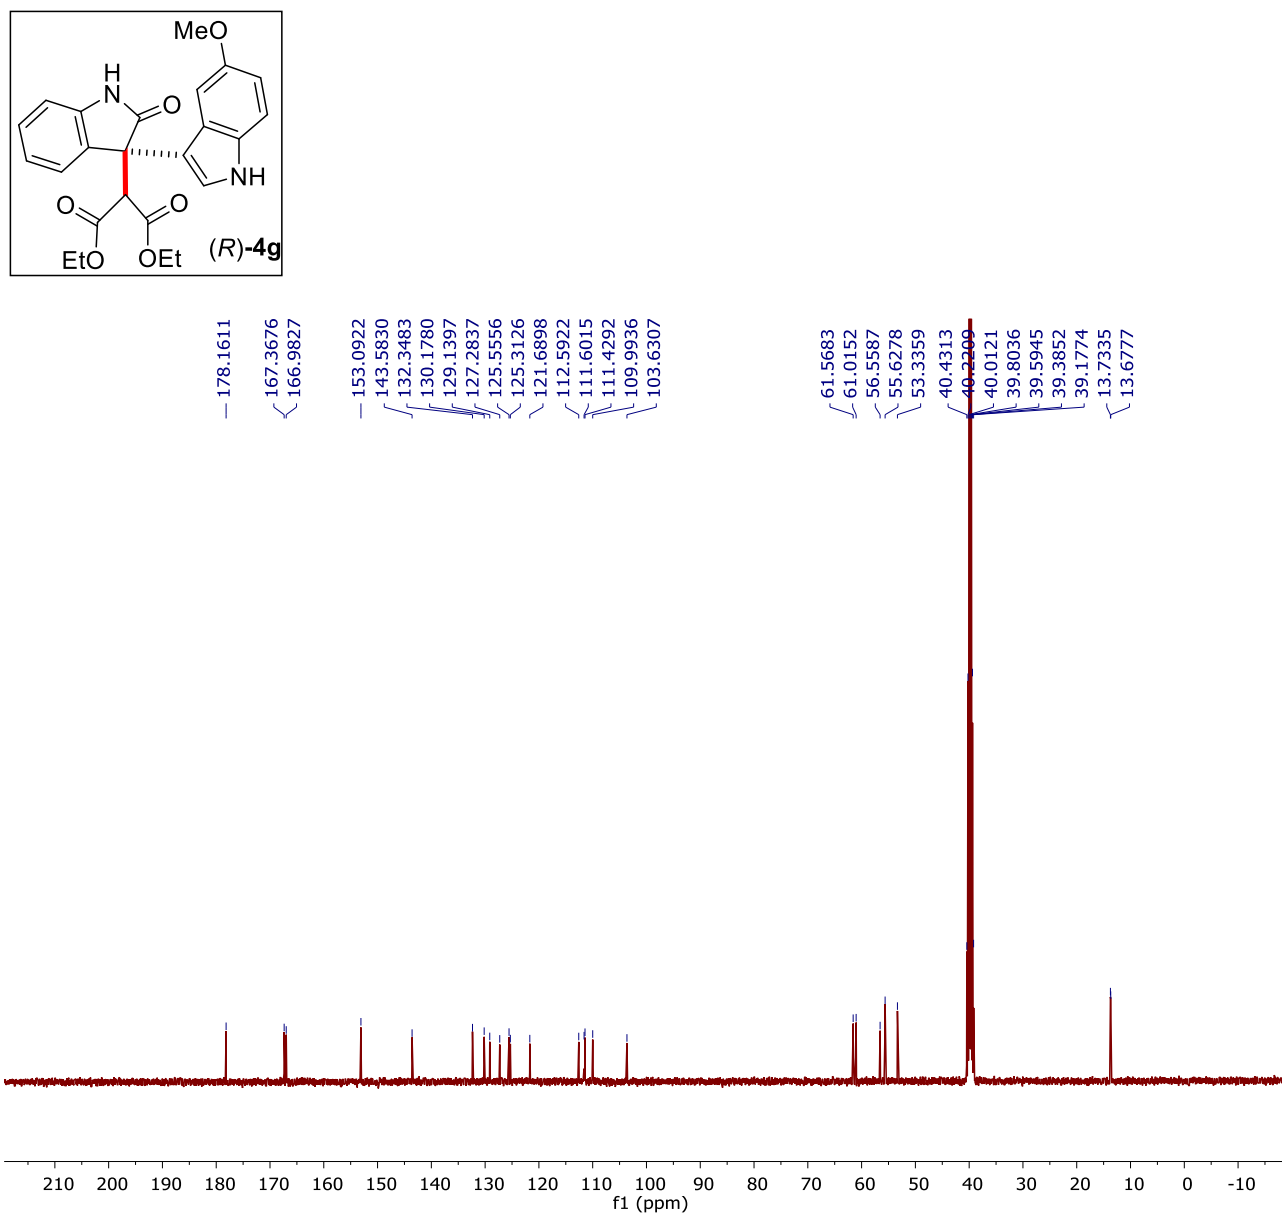

<sup>13</sup>C NMR (100 MHz, DMSO-D<sub>6</sub>) of compound **(R)-4g**

## Display Report

## Analysis Info

Analysis Name D:\Data\user data\2015\SEPTMBER-2015\09-SEPT-2015\Dr.A.Bisai-AB-KNB-02-258-R3\_1-B,1\_01\_3613.d  
Method HRLCMS-20 Sept tune wide.m  
Sample Name Dr.A.Bisai-AB-KNB-02-258-R3  
Comment

Acquisition Date 9/9/2015 3:09:11 PM

Operator RUCHI

Instrument micrOTOF-Q II 10330

## Acquisition Parameter

|             |            |                       |           |                  |           |
|-------------|------------|-----------------------|-----------|------------------|-----------|
| Source Type | ESI        | Ion Polarity          | Positive  | Set Nebulizer    | 1.2 Bar   |
| Focus       | Not active | Set Capillary         | 4500 V    | Set Dry Heater   | 200 °C    |
| Scan Begin  | 50 m/z     | Set End Plate Offset  | -500 V    | Set Dry Gas      | 7.0 l/min |
| Scan End    | 3000 m/z   | Set Collision Cell RF | 600.0 Vpp | Set Divert Valve | Waste     |

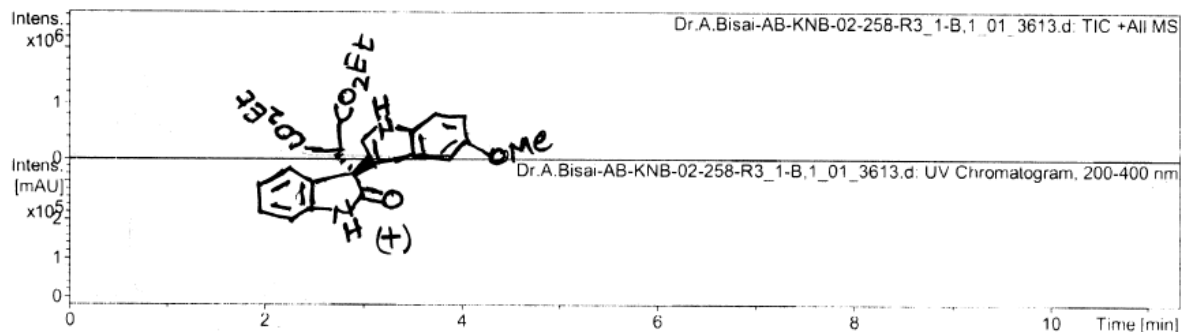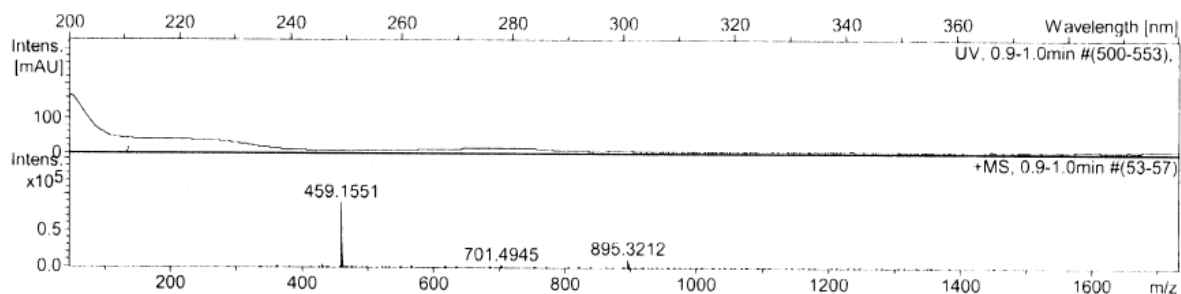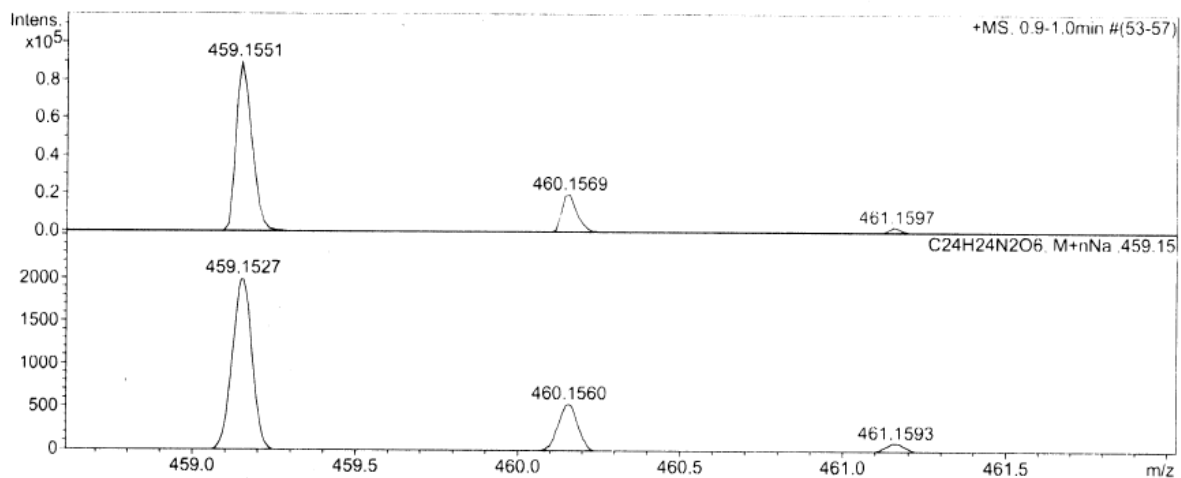



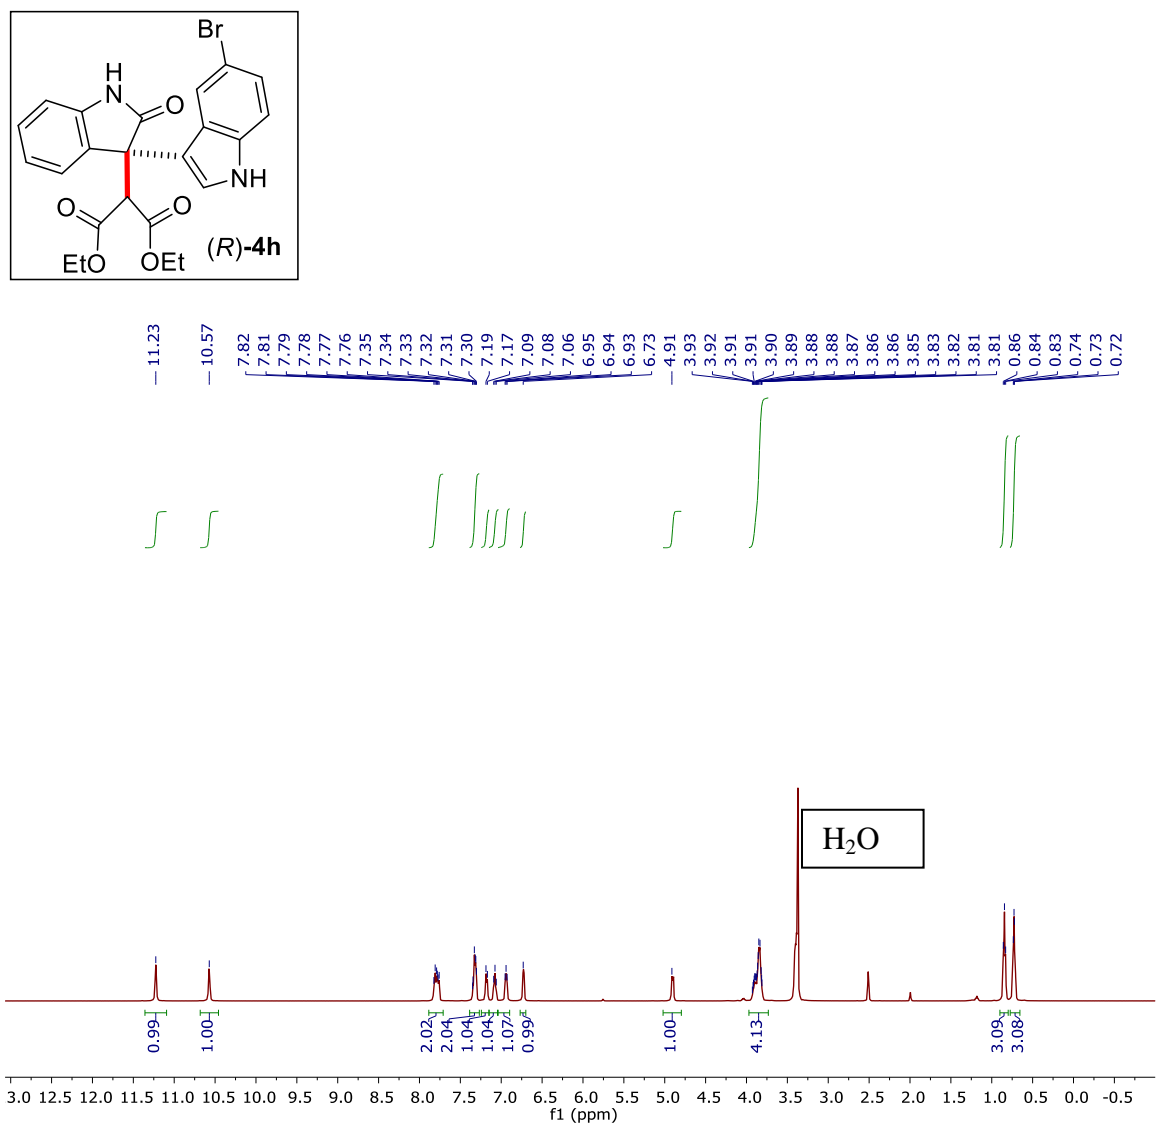

$^1\text{H}$  NMR (500 MHz, DMSO- $\text{D}_6$ ) of compound **(R)-4h**

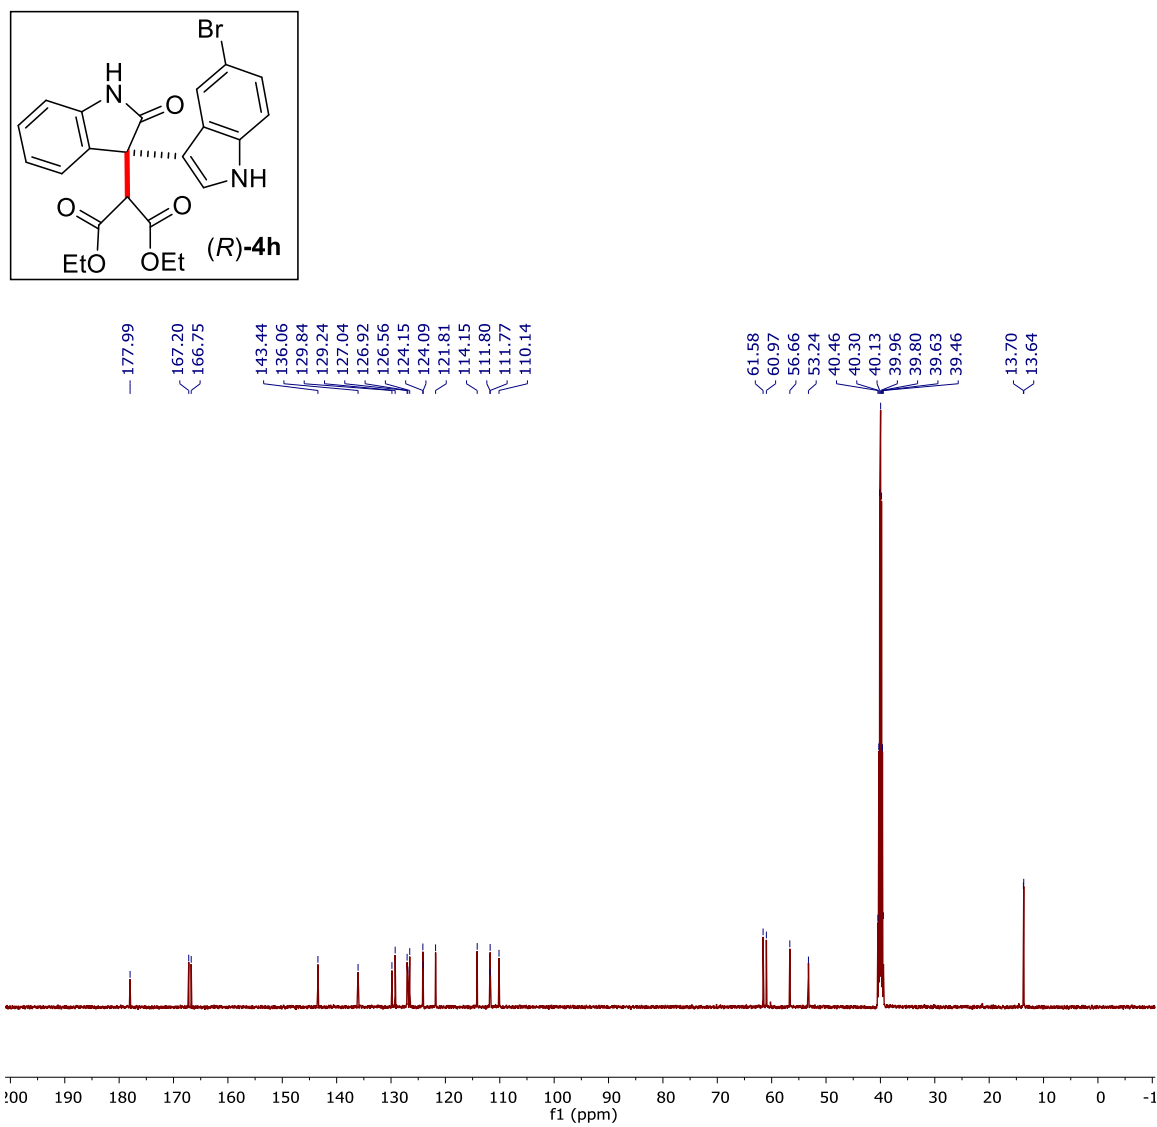

<sup>13</sup>C NMR (125 MHz, DMSO-D<sub>6</sub>) of compound **(R)-4h**

## Display Report

## Analysis Info

Analysis Name D:\Data\user data\2015\AUGEST-2015\26-AUG-2015\Dr.A.Bisai-AB-KNB-02-206\_1-B,3\_01\_3483.d  
Method HRLCMS-20 Sept tune wide.m  
Sample Name Dr.A.Bisai-AB-KNB-02-206  
Comment

Acquisition Date 8/26/2015 12:59:25 PM

Operator RUCHI

Instrument micrOTOF-Q II 10330

## Acquisition Parameter

|             |            |                       |           |                  |           |
|-------------|------------|-----------------------|-----------|------------------|-----------|
| Source Type | ESI        | Ion Polarity          | Positive  | Set Nebulizer    | 1.2 Bar   |
| Focus       | Not active | Set Capillary         | 4500 V    | Set Dry Heater   | 200 °C    |
| Scan Begin  | 50 m/z     | Set End Plate Offset  | -500 V    | Set Dry Gas      | 7.0 l/min |
| Scan End    | 3000 m/z   | Set Collision Cell RF | 600.0 Vpp | Set Divert Valve | Waste     |

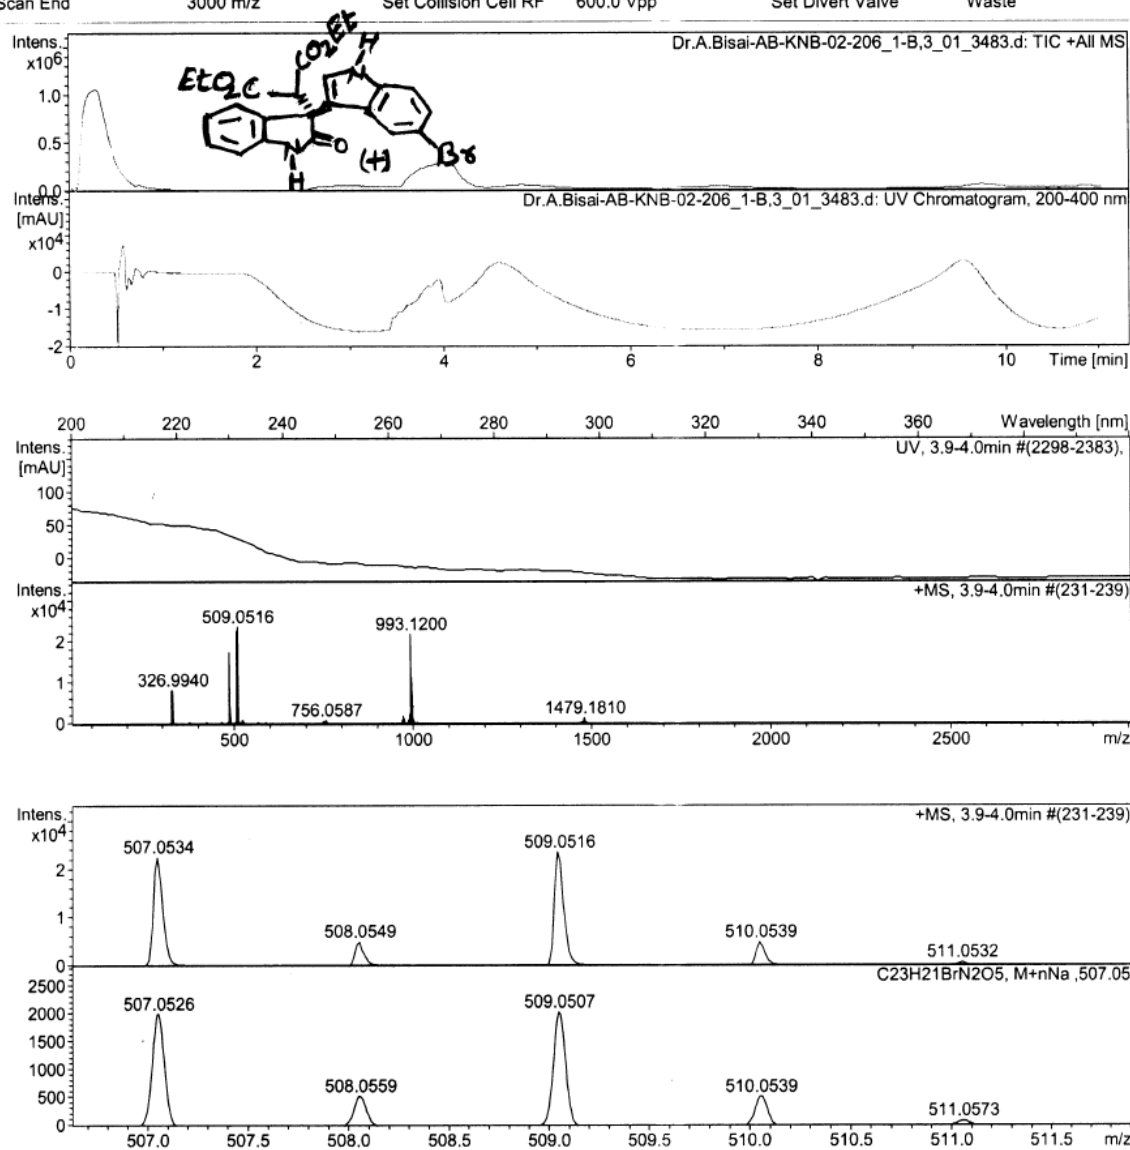

Bruker Compass DataAnalysis 4.0

printed: 8/26/2015 2:44:58 PM

Page 1 of 1

Scanned copy of mass spectrum of (R)-4h

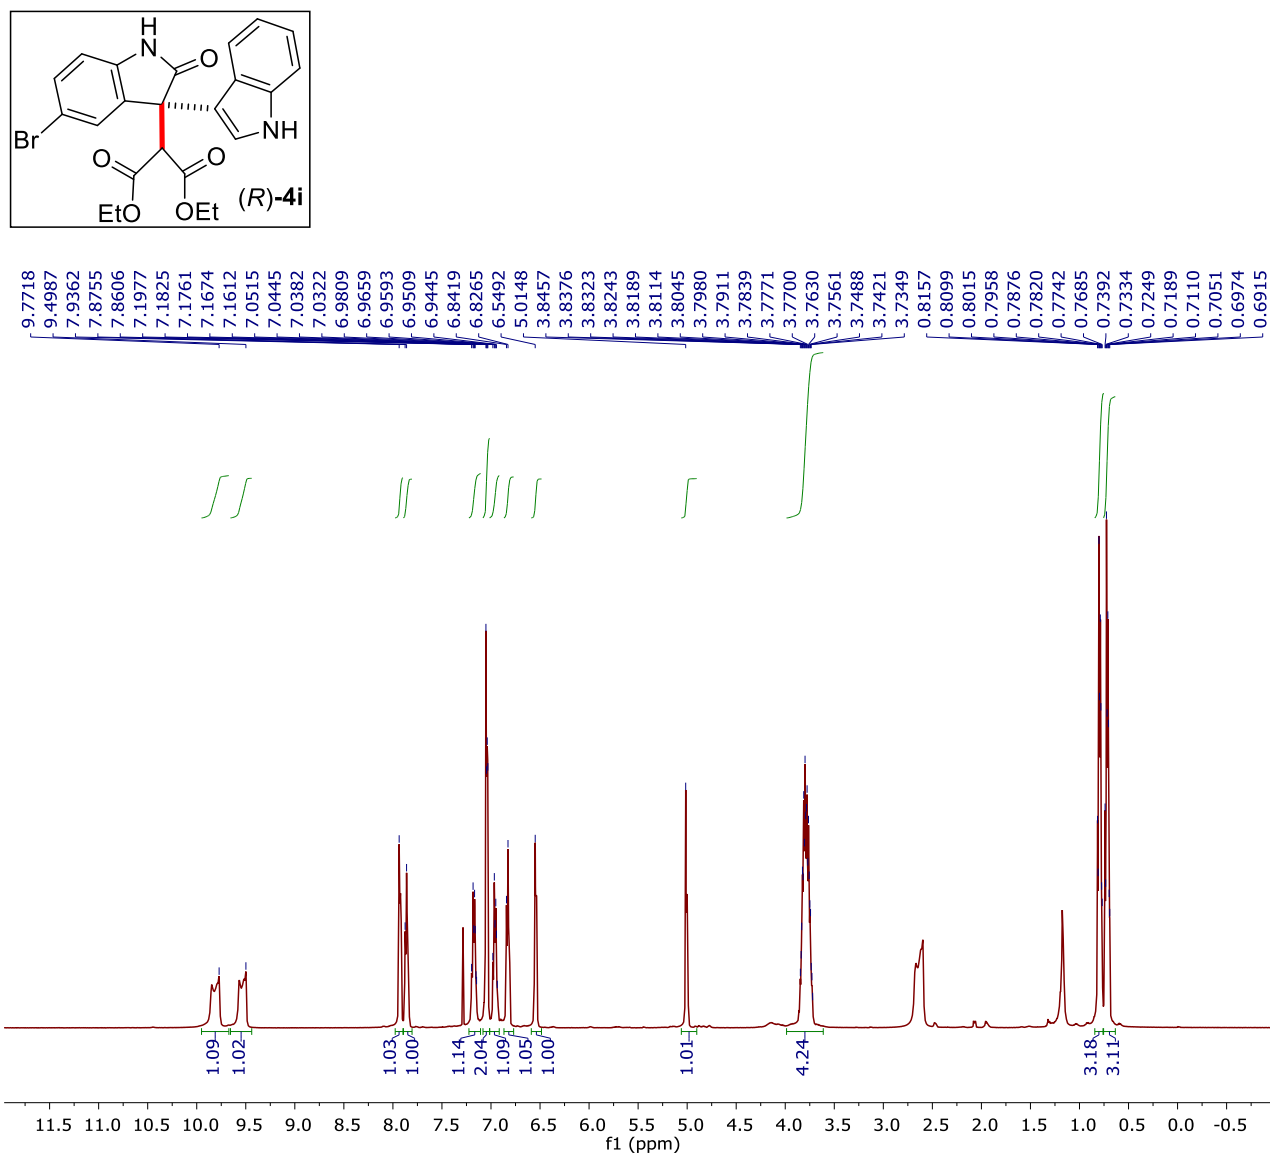

<sup>1</sup>H NMR (400 MHz, DMSO-D<sub>6</sub>) of compound (R)-4i

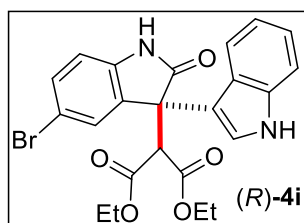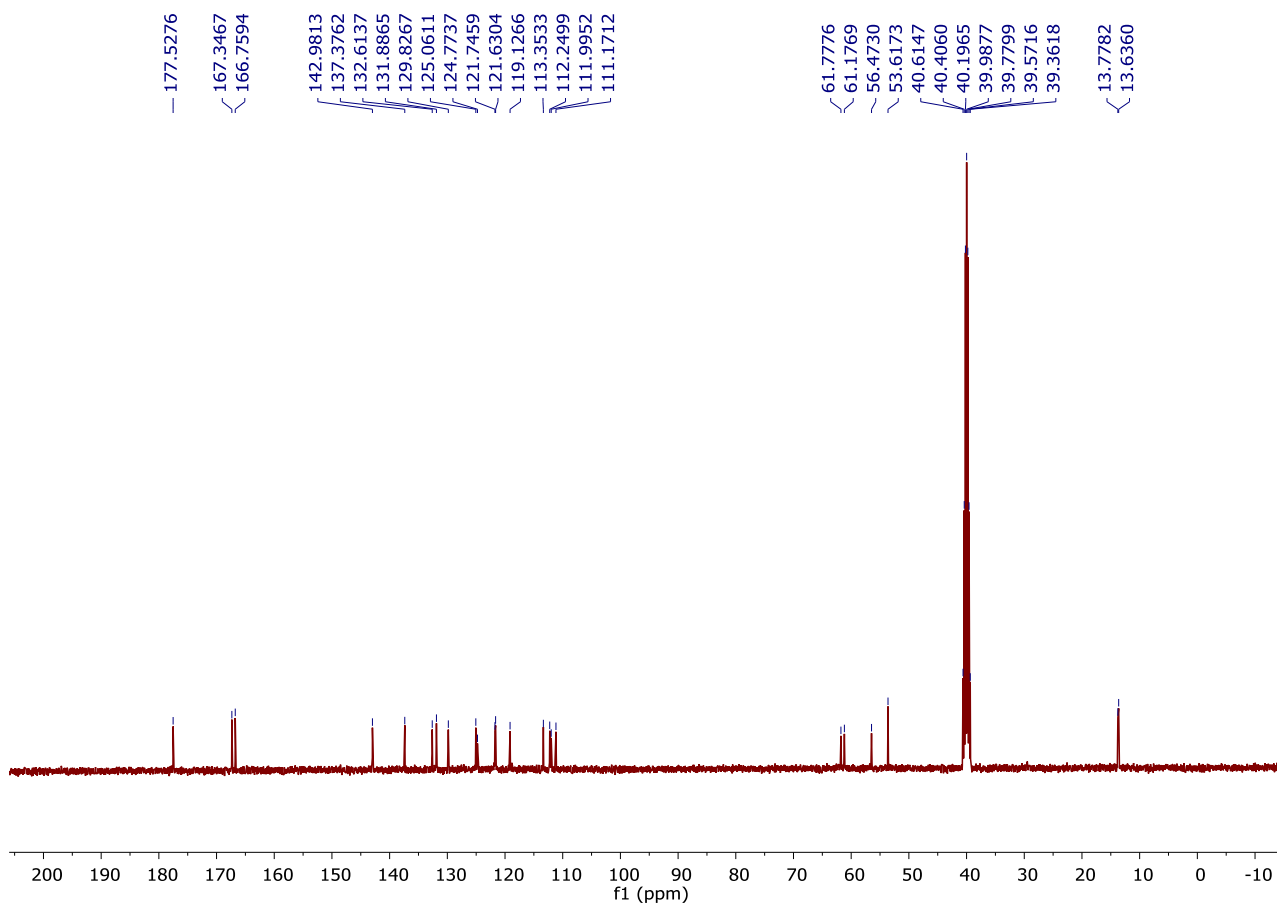

<sup>13</sup>C NMR (100 MHz, DMSO-D<sub>6</sub>) of compound **(R)-4i**

## Display Report

## Analysis Info

Analysis Name D:\Data\user data\2015\AUGEST-2015\26-AUG-2015\Dr.A.Bisai-AB-KNB-02-205\_1-B.2\_01\_3482.d  
Method HRLCMS-20 Sept tune wide.m  
Sample Name Dr.A.Bisai-AB-KNB-02-205  
Comment

Acquisition Date 8/26/2015 12:47:16 PM

Operator RUCHI

Instrument microTOF-Q II 10330

## Acquisition Parameter

|             |            |                       |           |                  |           |
|-------------|------------|-----------------------|-----------|------------------|-----------|
| Source Type | ESI        | Ion Polarity          | Positive  | Set Nebulizer    | 1.2 Bar   |
| Focus       | Not active | Set Capillary         | 4500 V    | Set Dry Heater   | 200 °C    |
| Scan Begin  | 50 m/z     | Set End Plate Offset  | -500 V    | Set Dry Gas      | 7.0 l/min |
| Scan End    | 3000 m/z   | Set Collision Cell RF | 600.0 Vpp | Set Divert Valve | Waste     |

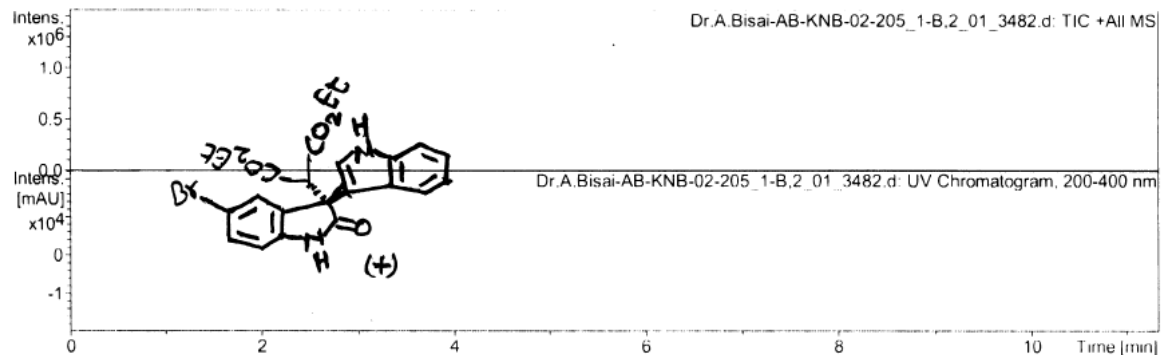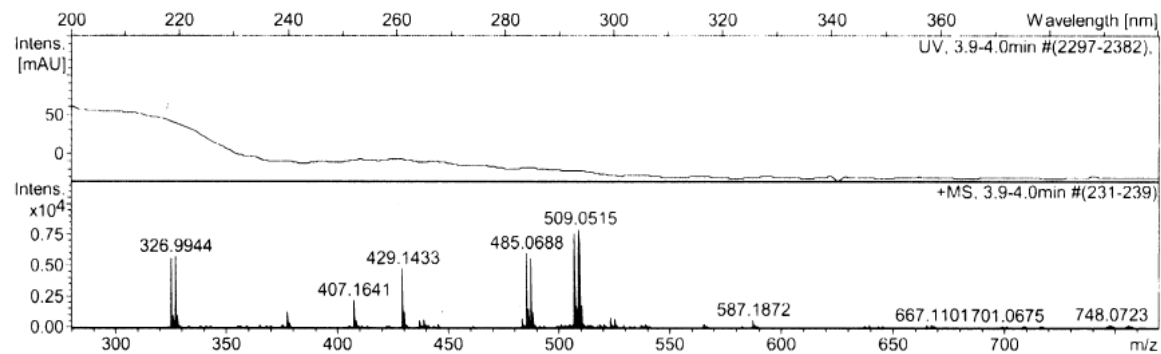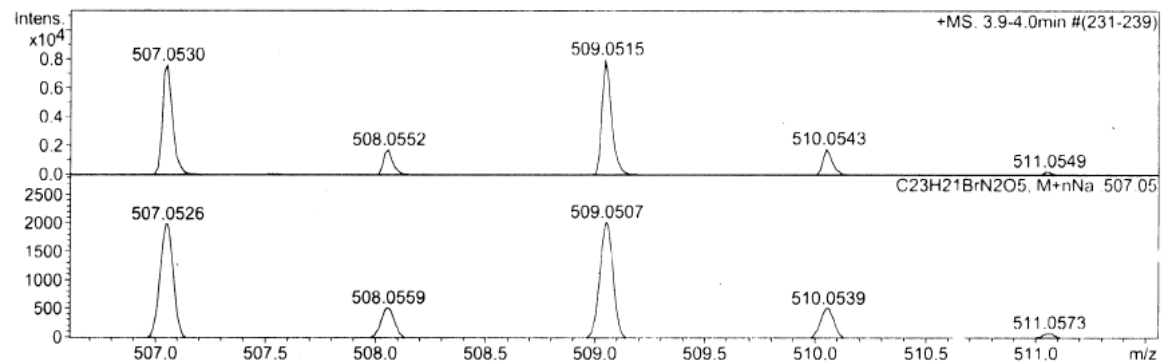

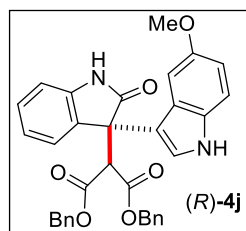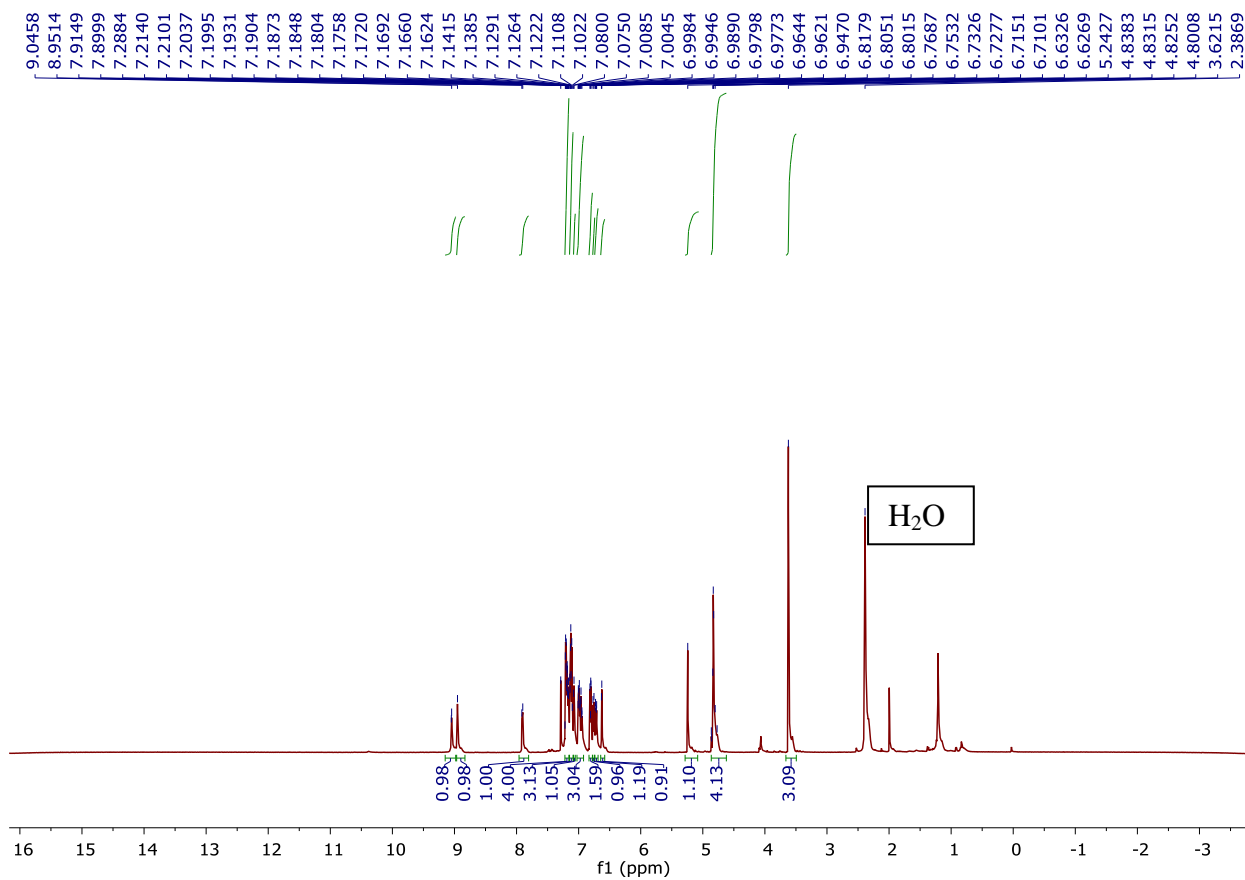

$^1\text{H}$  NMR (0.4 mL  $\text{CDCl}_3$ , 0.1 mL  $\text{DMSO}-d_6$ ) of compound **(R)-4j**

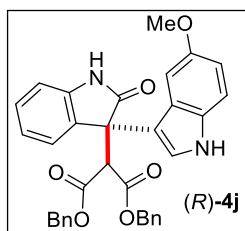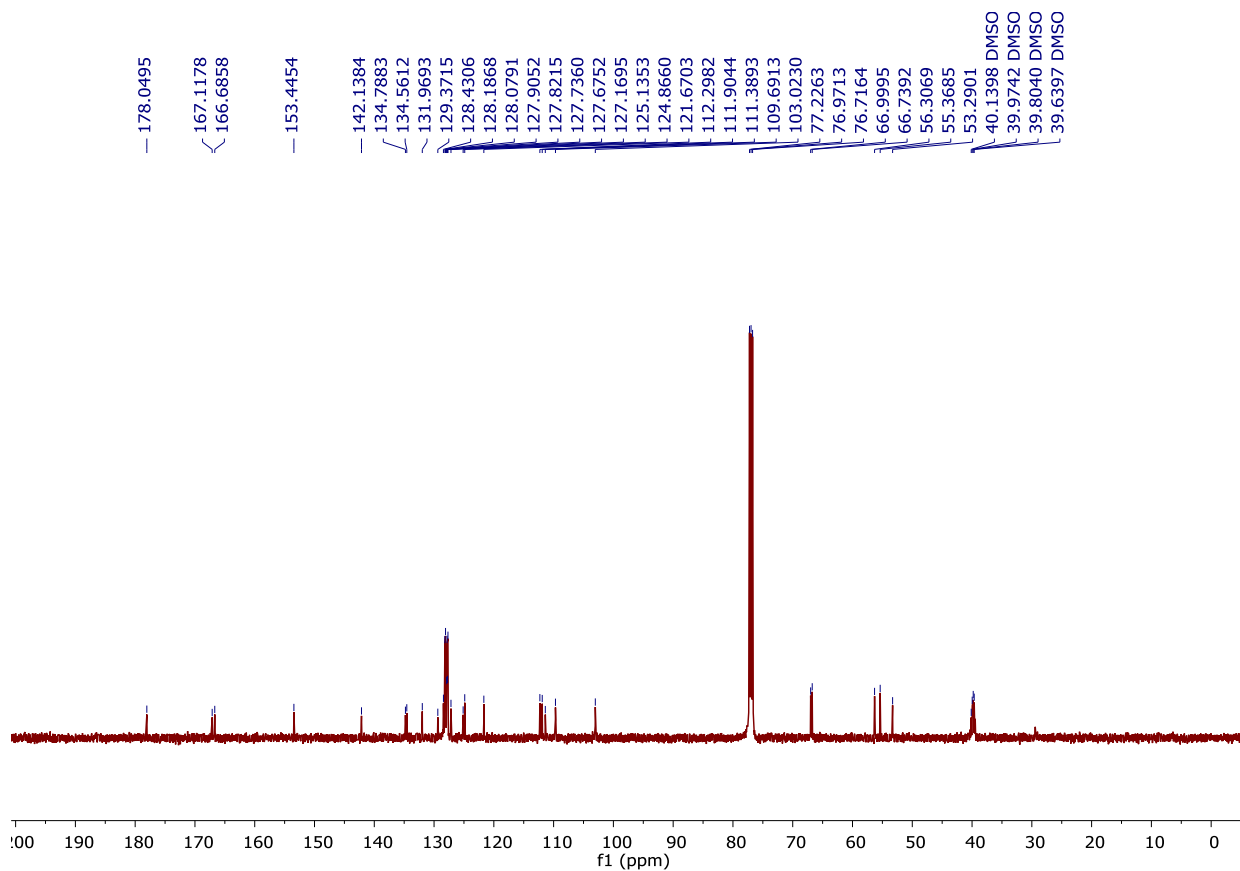

$^{13}\text{C}$  NMR (0.4 mL  $\text{CDCl}_3$ , 0.1 mL  $\text{DMSO}-\text{D}_6$ ) of compound (R)-**4j**



## Display Report

## Analysis Info

Analysis Name D:\Data\user data\2015\SEPTEMBER-2015\09-SEPT-2015\Dr.A.Bisai-AB-KNB-02-280\_1-A,6\_01\_3610.d  
 Method HRLCMS-20 Sept tune wide.m  
 Sample Name Dr.A.Bisai-AB-KNB-02-280  
 Comment

Acquisition Date 9/9/2015 2:32:38 PM  
 Operator RUCHI  
 Instrument micrOTOF-Q II 10330

## Acquisition Parameter

|             |            |                       |           |                  |           |
|-------------|------------|-----------------------|-----------|------------------|-----------|
| Source Type | ESI        | Ion Polarity          | Positive  | Set Nebulizer    | 1.2 Bar   |
| Focus       | Not active | Set Capillary         | 4500 V    | Set Dry Heater   | 200 °C    |
| Scan Begin  | 50 m/z     | Set End Plate Offset  | -500 V    | Set Dry Gas      | 7.0 l/min |
| Scan End    | 3000 m/z   | Set Collision Cell RF | 600.0 Vpp | Set Divert Valve | Waste     |

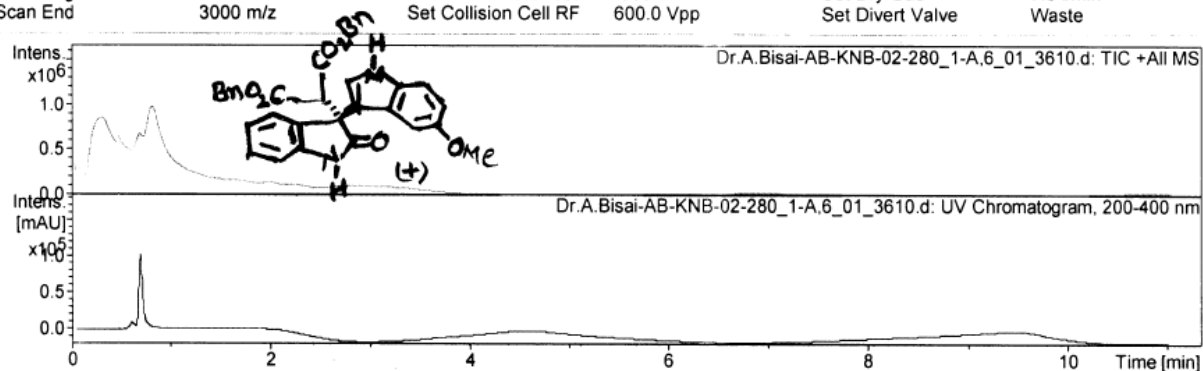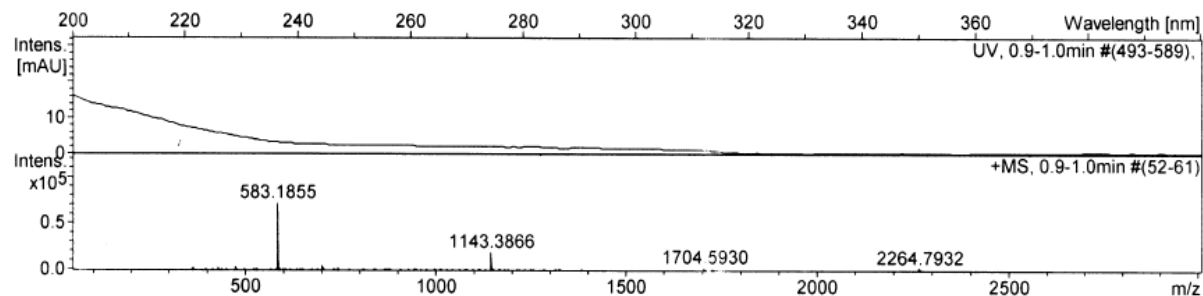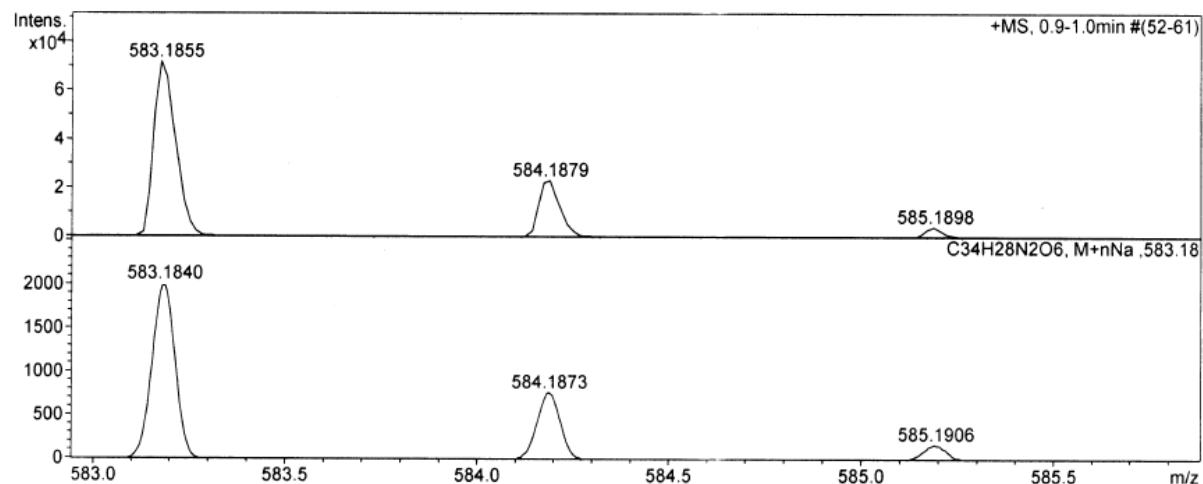

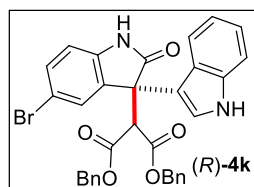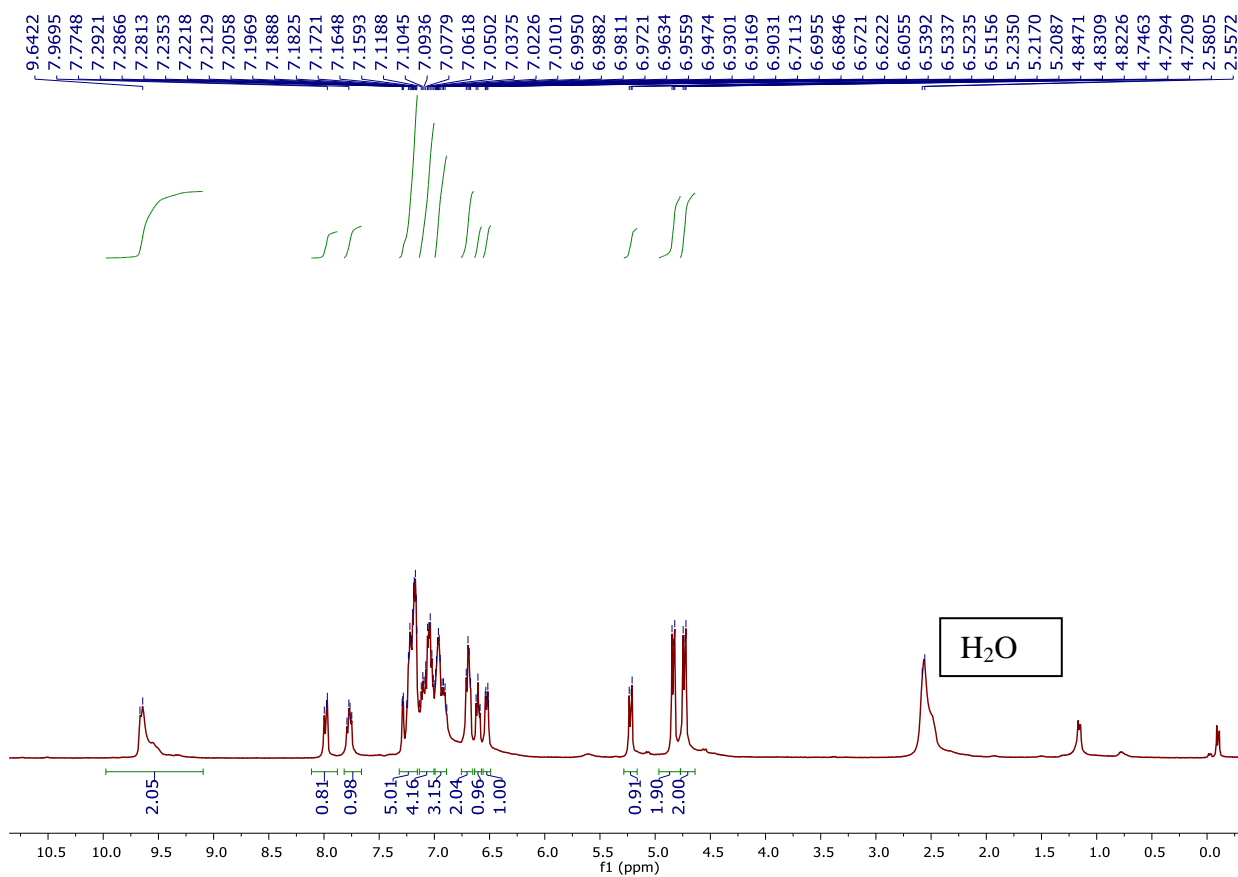

$^1\text{H}$  NMR (500 MHz, 0.4 mL  $\text{CDCl}_3$ , 0.1 mL  $\text{DMSO-D}_6$ ) of compound (R)-4k

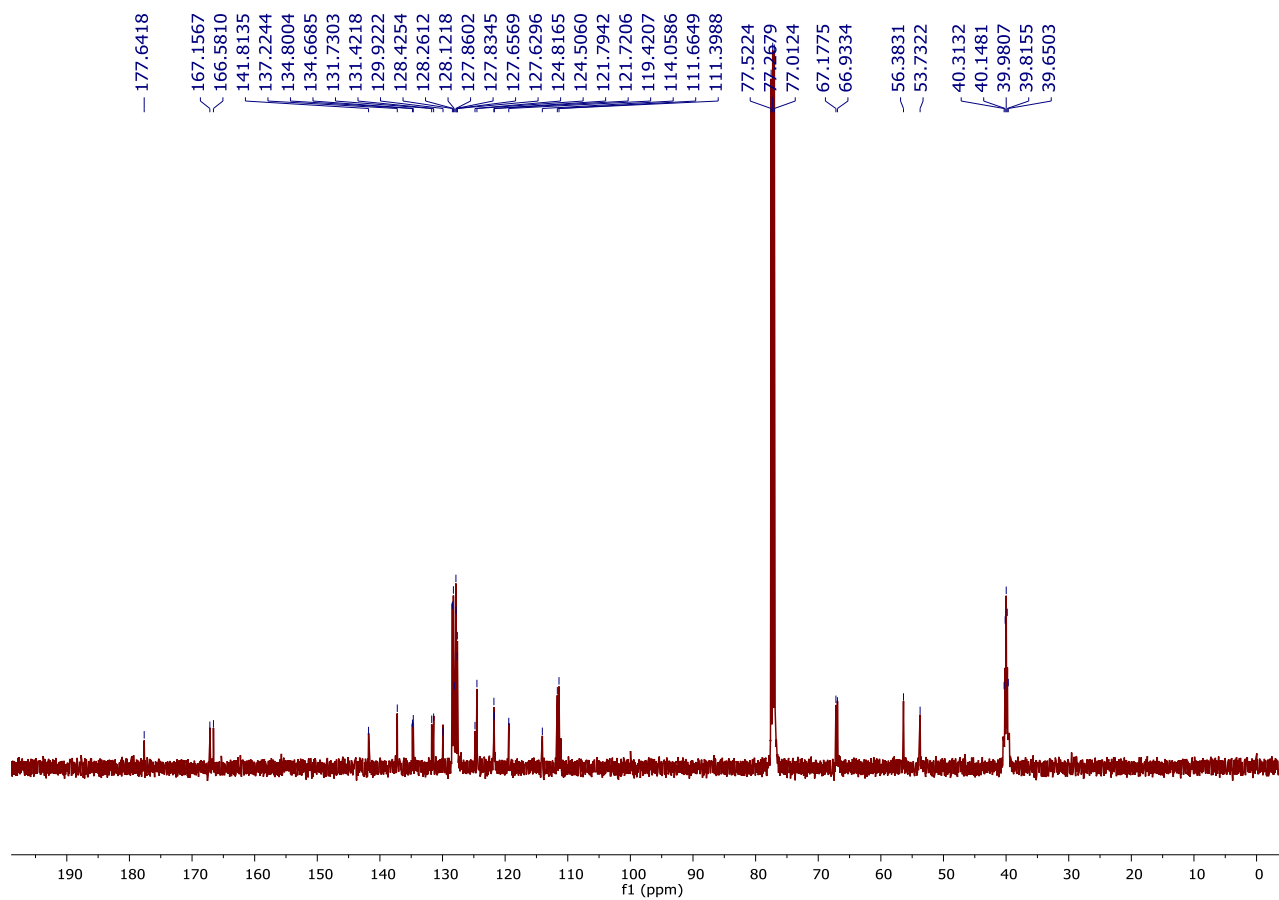

$^{13}\text{C}$  NMR (120 MHz, 0.4 mL  $\text{CDCl}_3$ , 0.1 (R)-4k

## Display Report

## Analysis Info

Analysis Name D:\Data\user data\2017\MAY 2017\25 may\Dr A Bisai-KNB-02-324\_1-E,4\_01\_1707.d  
 Method hrlcms\_pos\_mid\_tunemix.m  
 Sample Name Dr A Bisai-KNB-02-324  
 Comment

Acquisition Date 5/25/2017 11:01:27 AM

Operator RUCHI SHRIVASTAVA

Instrument micrOTOF-Q II 10330

## Acquisition Parameter

|             |          |                       |           |                  |           |
|-------------|----------|-----------------------|-----------|------------------|-----------|
| Source Type | ESI      | Ion Polarity          | Positive  | Set Nebulizer    | 0.3 Bar   |
| Focus       | Active   | Set Capillary         | 4500 V    | Set Dry Heater   | 200 °C    |
| Scan Begin  | 50 m/z   | Set End Plate Offset  | -500 V    | Set Dry Gas      | 4.0 l/min |
| Scan End    | 3000 m/z | Set Collision Cell RF | 450.0 Vpp | Set Divert Valve | Waste     |

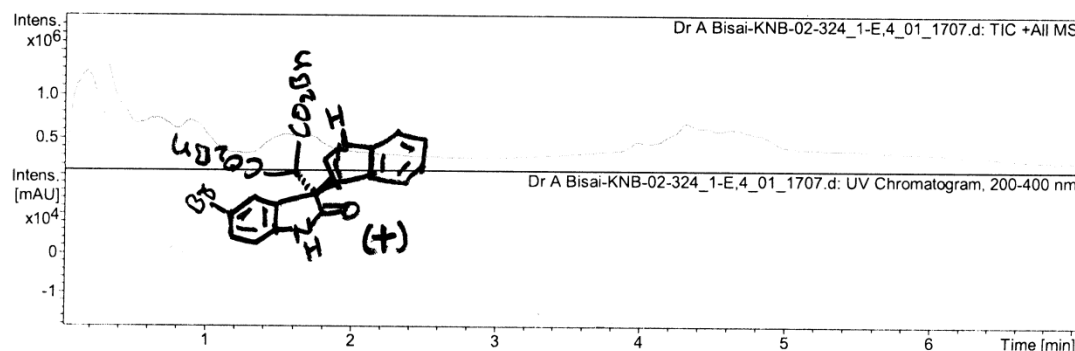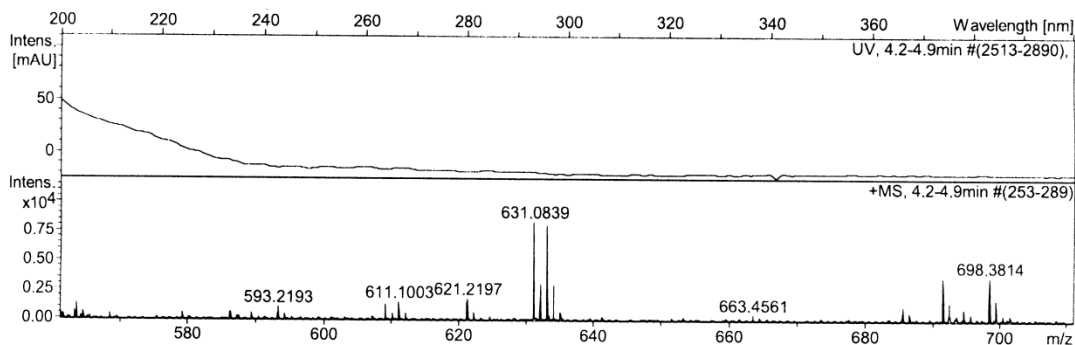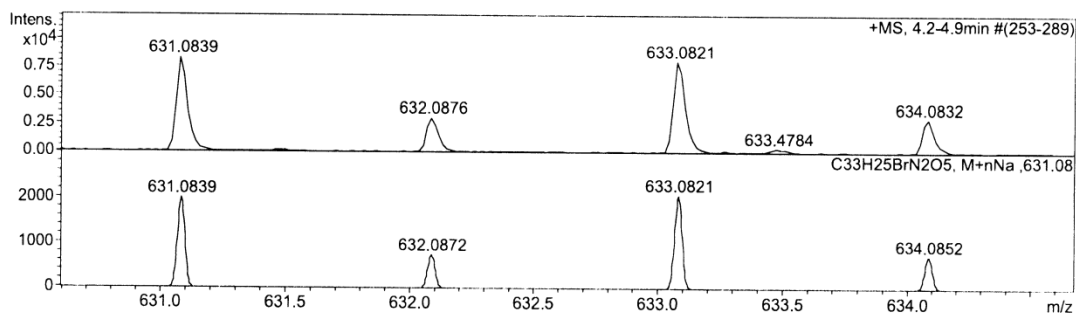

Scanned copy of mass spectrum of (R)-4k

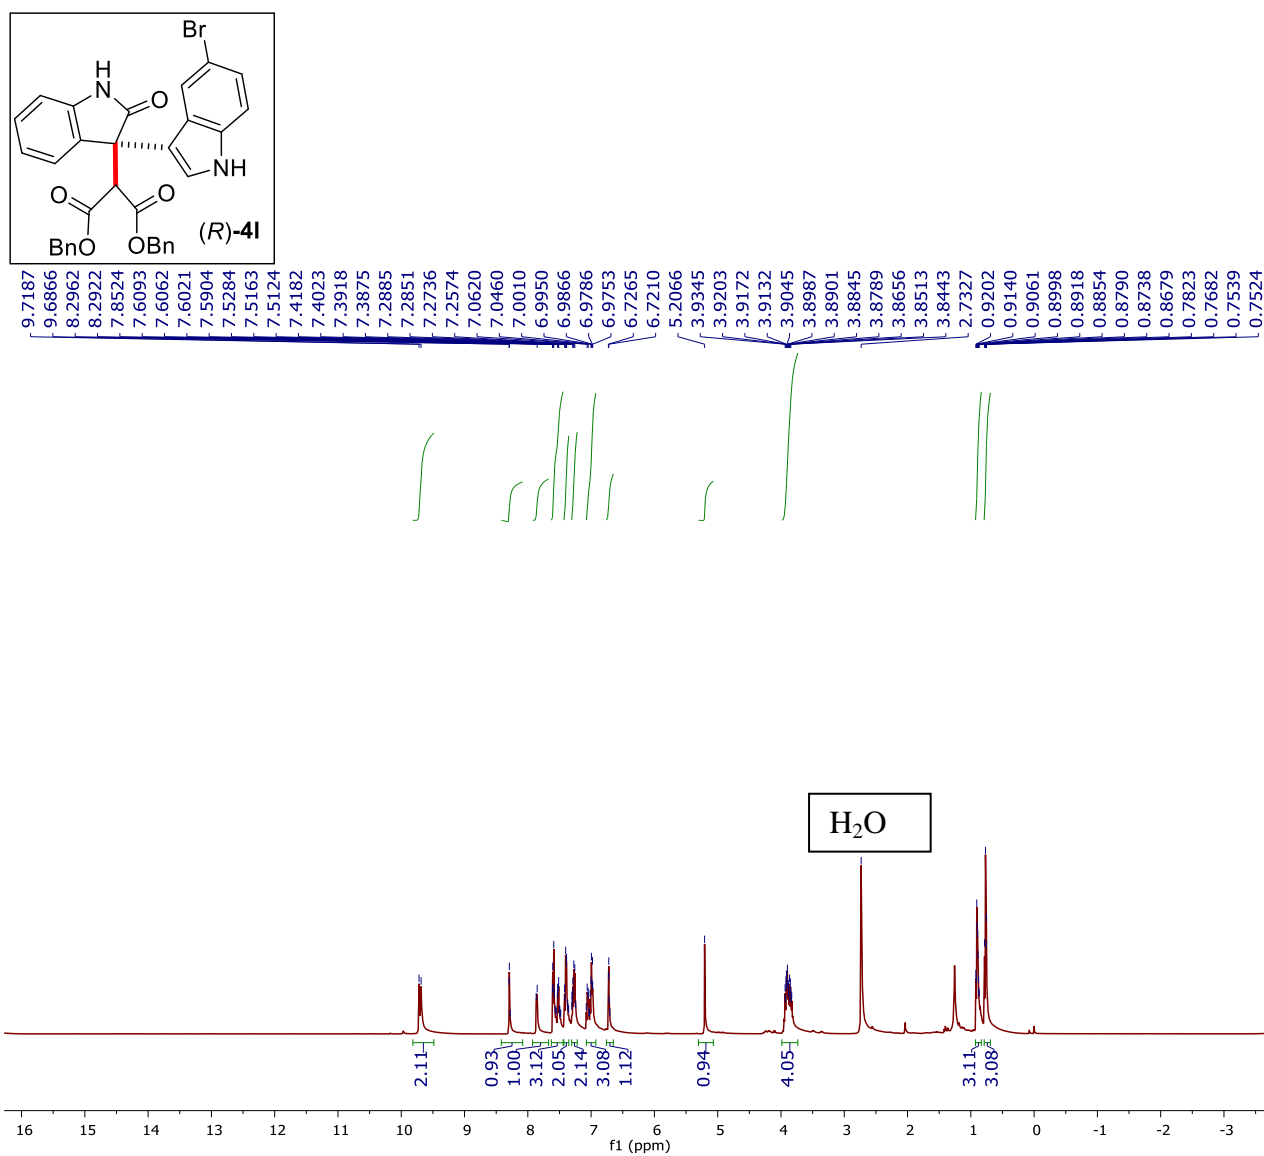

<sup>1</sup>H NMR (400 MHz, 0.4 mL CDCl<sub>3</sub>, 0.1 mL DMSO-D<sub>6</sub>) of compound (R)-41

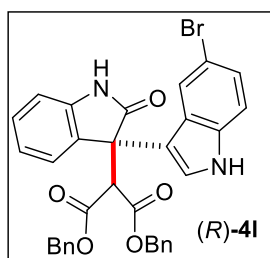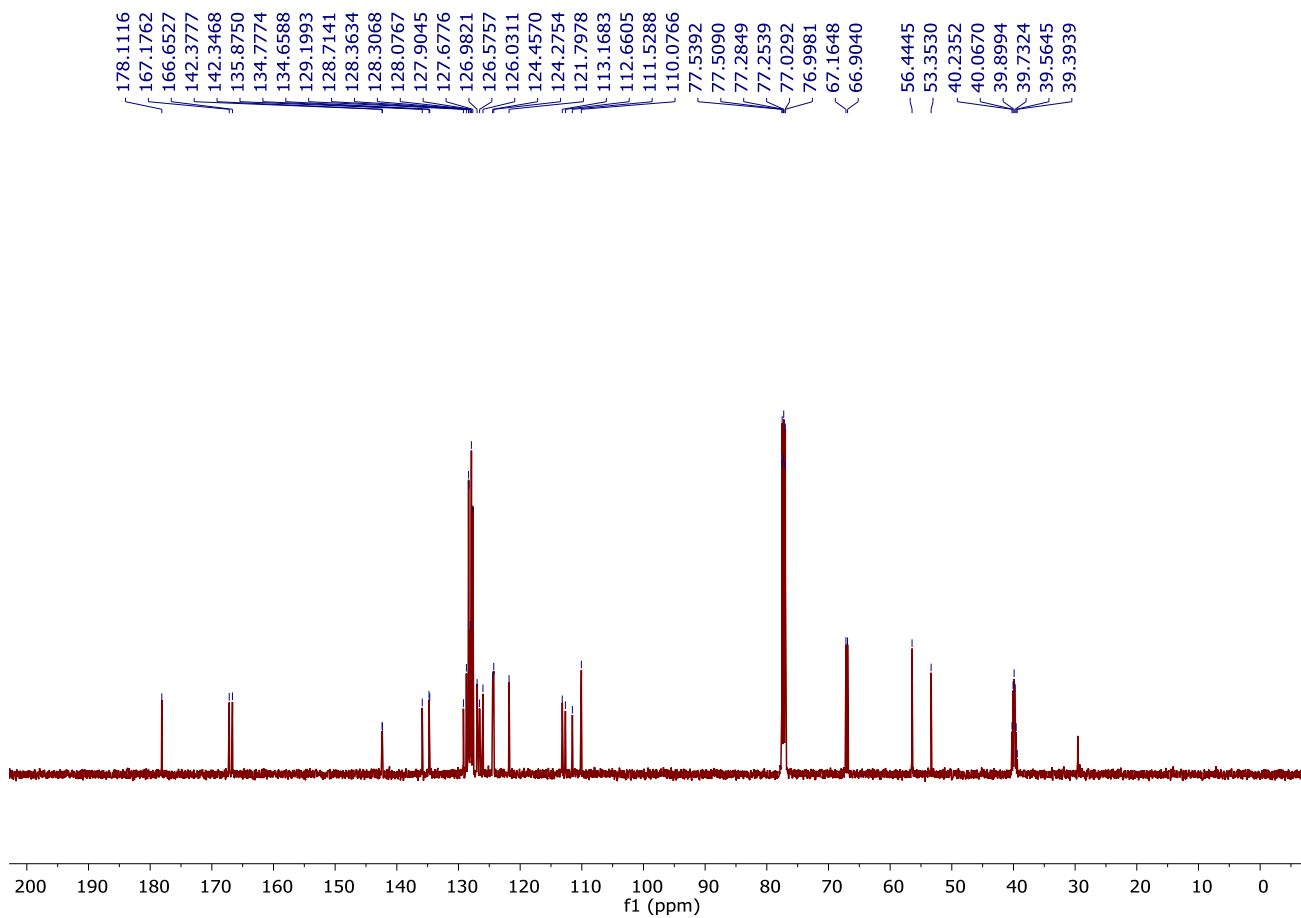

$^{13}\text{C}$  NMR (100 MHz, 0.4 mL  $\text{CDCl}_3$ , 0.1 mL  $\text{DMSO-D}_6$ ) of compound **(R)-41**

## Display Report

## Analysis Info

Analysis Name D:\Data\user data\2015\SEPTMBER-2015\09-SEPT-2015\Dr.A.Bisai-AB-KNB-02-279\_1-A,7\_01\_3611.d  
Method HRLCMS-20 Sept tune wide.m  
Sample Name Dr.A.Bisai-AB-KNB-02-279  
Comment

Acquisition Date 9/9/2015 2:44:51 PM  
Operator RUCHI  
Instrument micrOTOF-Q II 10330

## Acquisition Parameter

|             |            |                       |           |                  |           |
|-------------|------------|-----------------------|-----------|------------------|-----------|
| Source Type | ESI        | Ion Polarity          | Positive  | Set Nebulizer    | 1.2 Bar   |
| Focus       | Not active | Set Capillary         | 4500 V    | Set Dry Heater   | 200 °C    |
| Scan Begin  | 50 m/z     | Set End Plate Offset  | -500 V    | Set Dry Gas      | 7.0 l/min |
| Scan End    | 3000 m/z   | Set Collision Cell RF | 600.0 Vpp | Set Divert Valve | Waste     |

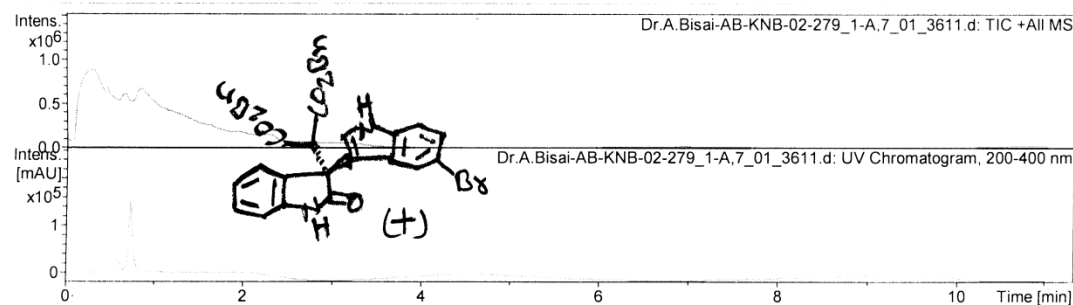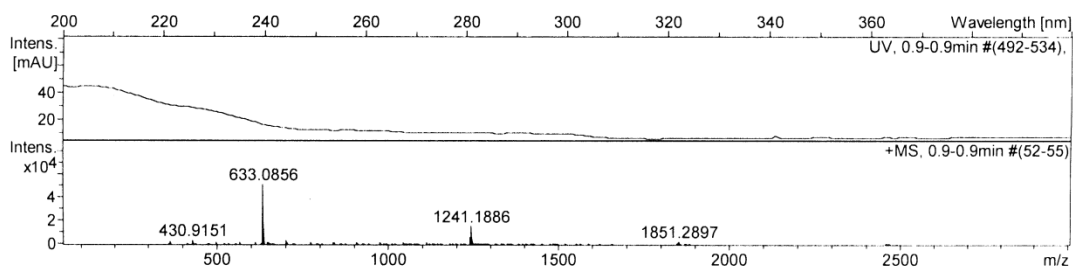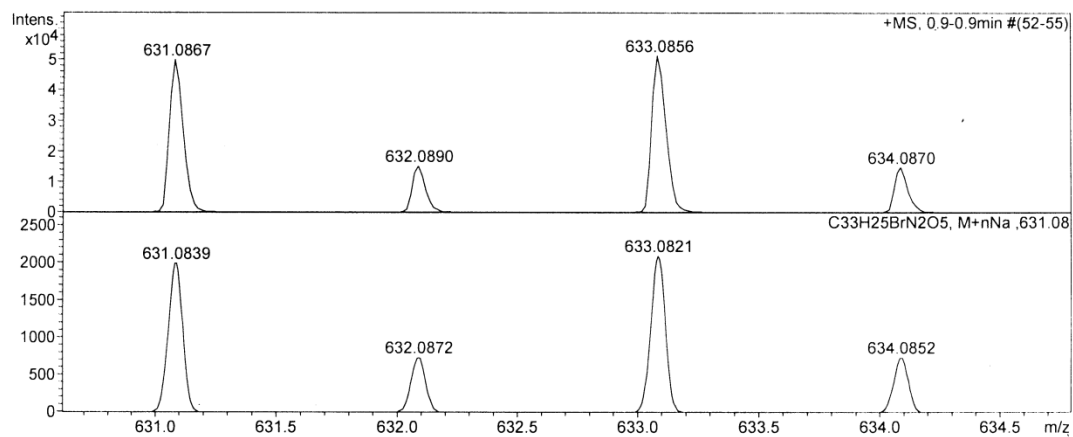

Scanned copy of mass spectrum of (R)-41

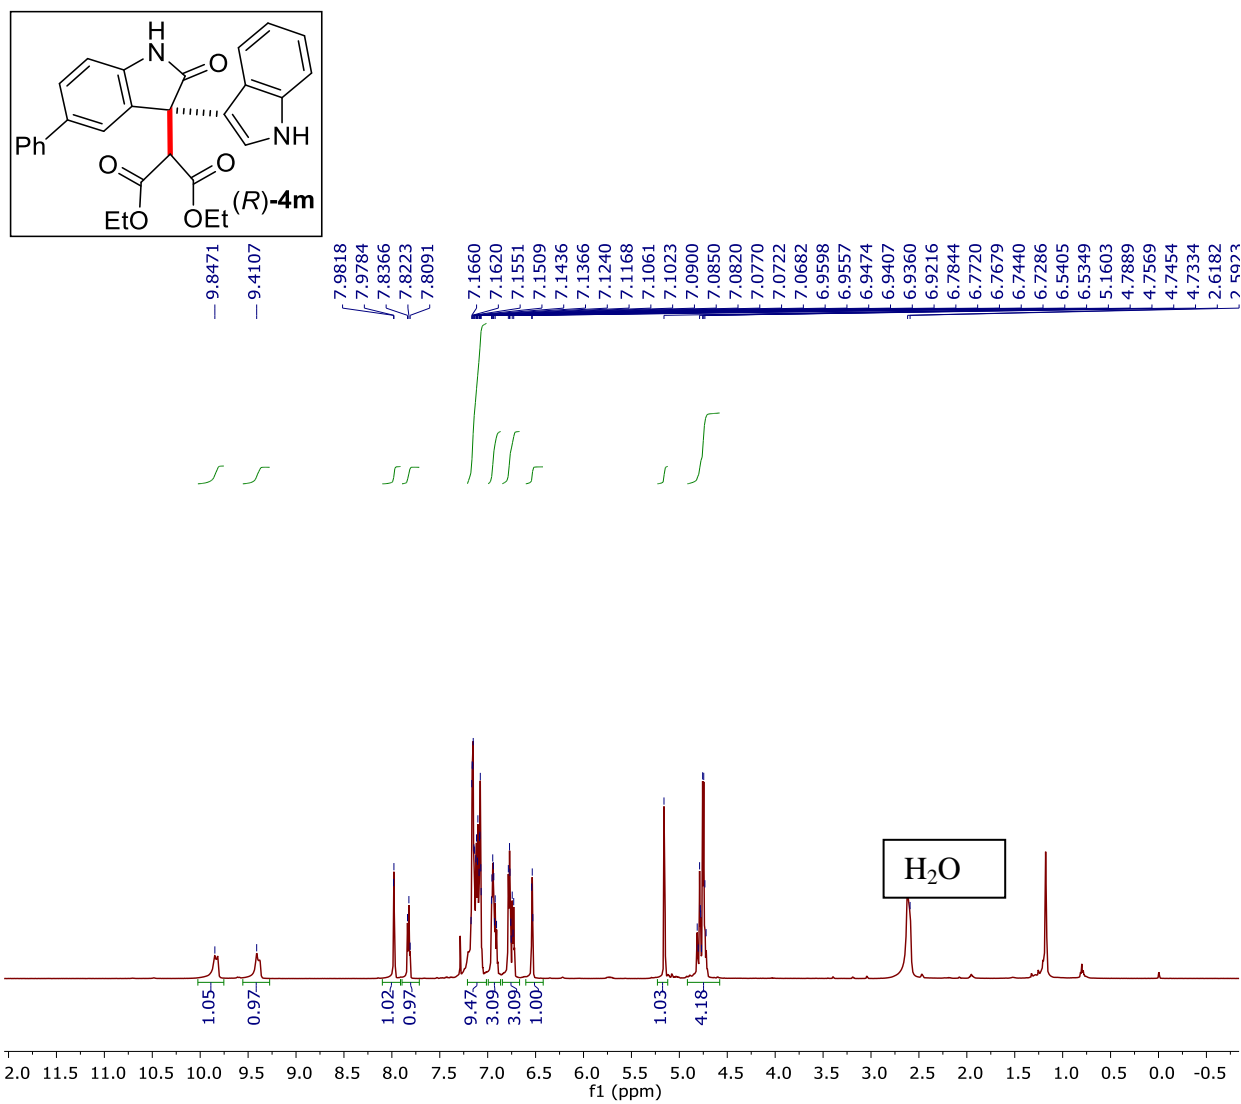

$^1\text{H}$  NMR (500 MHz, 0.4 mL  $\text{CDCl}_3$ , 0.1 mL  $\text{DMSO-D}_6$ ) of compound **(R)-4m**



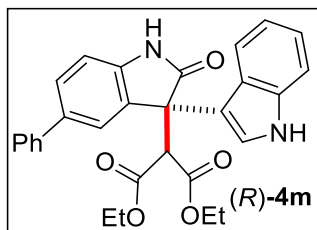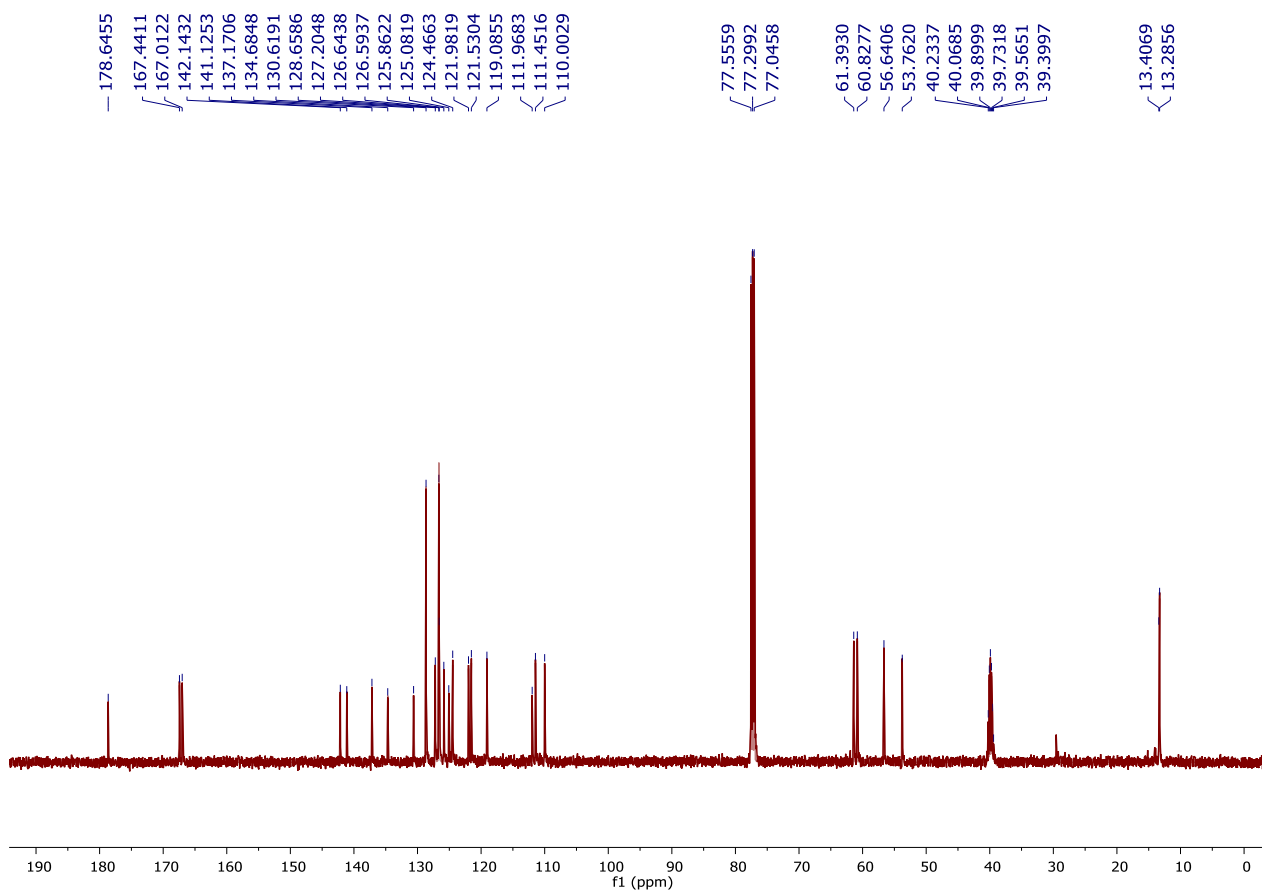

<sup>13</sup>C NMR (125 MHz, 0.4 mL CDCl<sub>3</sub>, 0.1 mL DMSO-D<sub>6</sub>) of compound **(R)-4m**

## Display Report

## Analysis Info

Analysis Name D:\Data\user data\2016\July 2016\29-07-2016\Dr.A.Bisai-AB-KNB-03-302\_1-B,2\_01\_7003.d  
 Method hrlcms-pos\_mid\_tune wide.m  
 Sample Name Dr.A.Bisai-AB-KNB-03-302  
 Comment

Acquisition Date 7/29/2016 3:31:06 PM

Operator DIMPLE

Instrument micrOTOF-Q II 10330

## Acquisition Parameter

|             |          |                       |           |                  |           |
|-------------|----------|-----------------------|-----------|------------------|-----------|
| Source Type | ESI      | Ion Polarity          | Positive  | Set Nebulizer    | 0.3 Bar   |
| Focus       | Active   | Set Capillary         | 4500 V    | Set Dry Heater   | 200 °C    |
| Scan Begin  | 50 m/z   | Set End Plate Offset  | -500 V    | Set Dry Gas      | 4.0 l/min |
| Scan End    | 3000 m/z | Set Collision Cell RF | 450.0 Vpp | Set Divert Valve | Waste     |

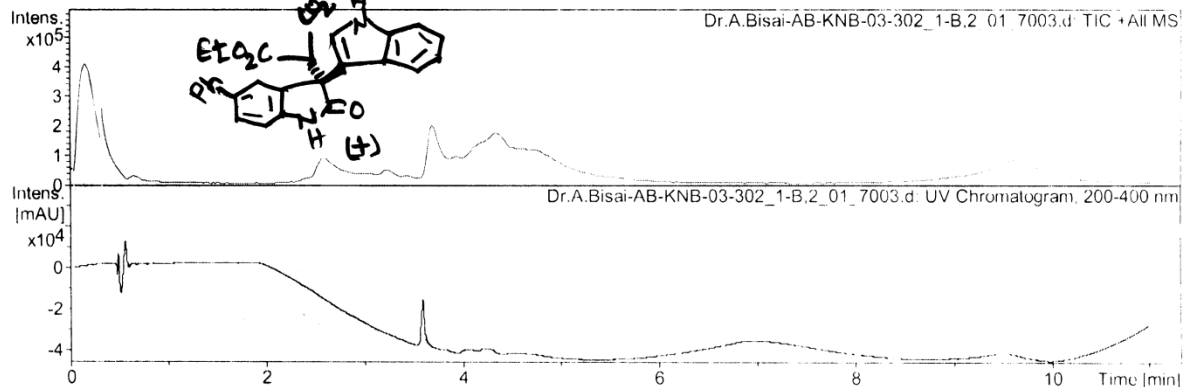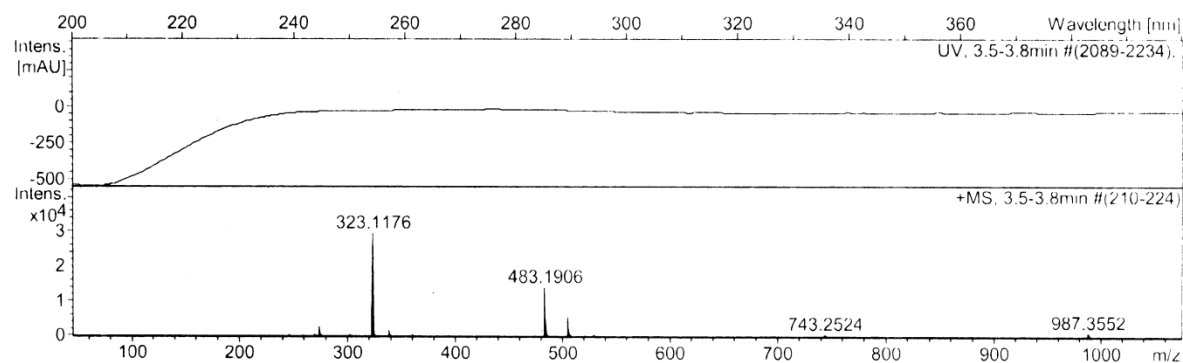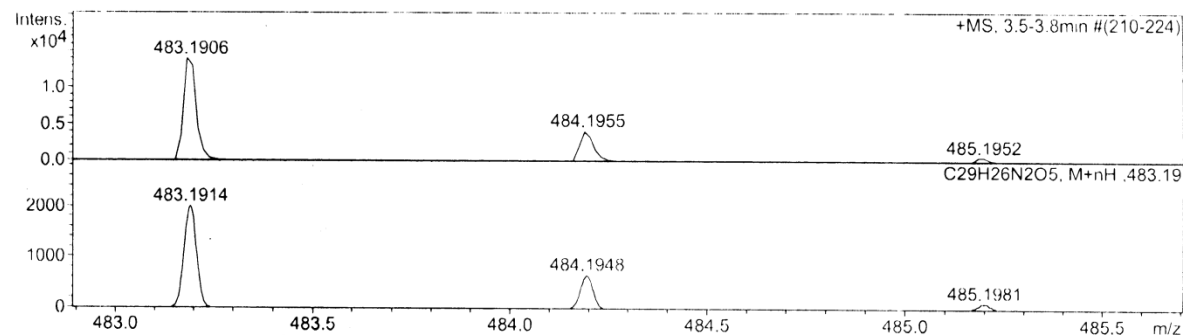

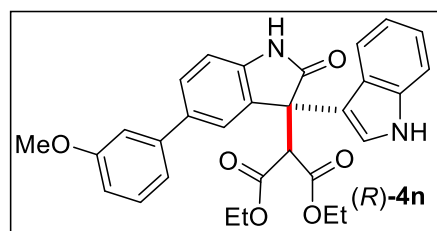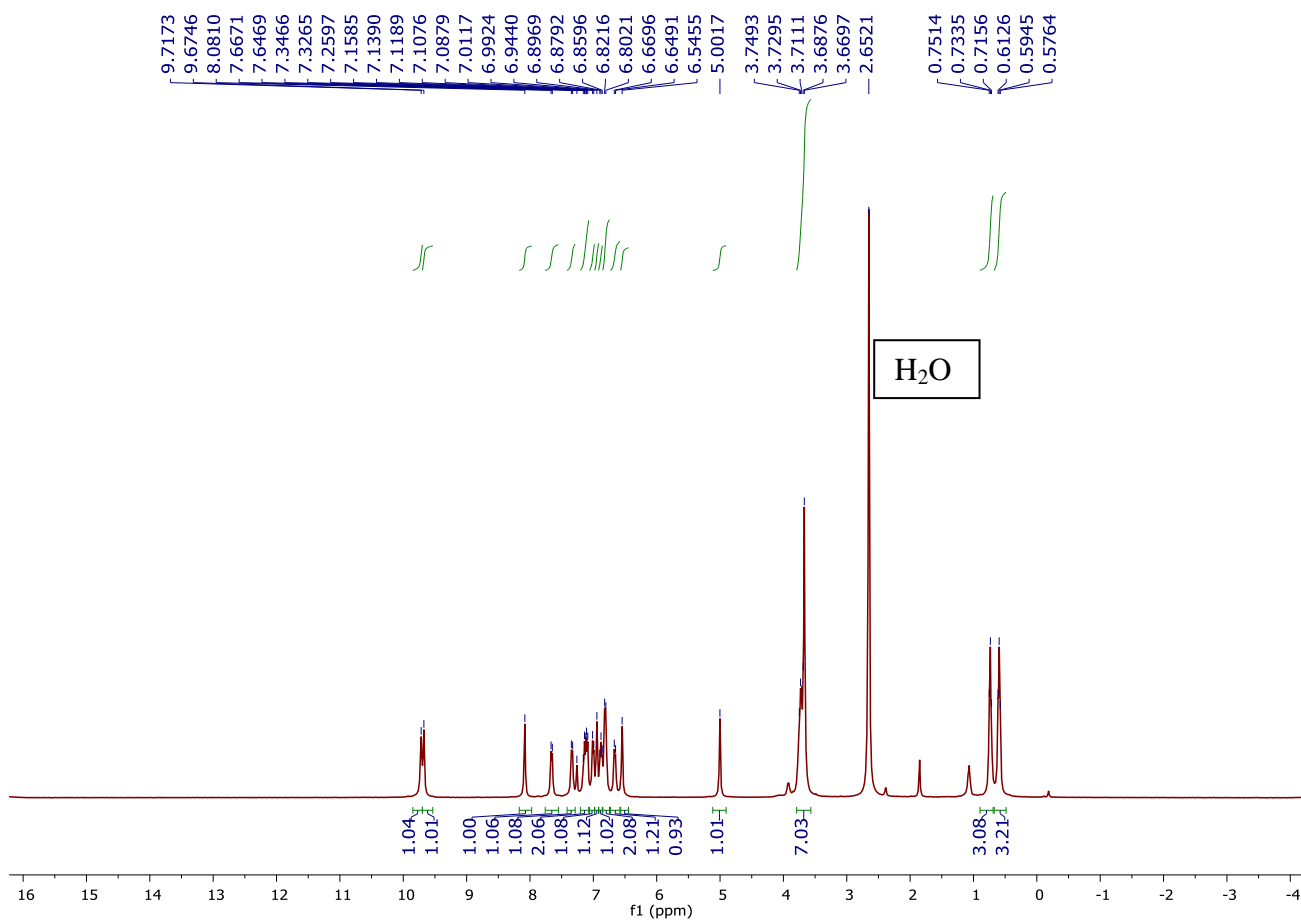

<sup>1</sup>H NMR (500 MHz, 0.4 mL CDCl<sub>3</sub>, 0.1 mL DMSO-D<sub>6</sub>) of compound **(R)-4n**

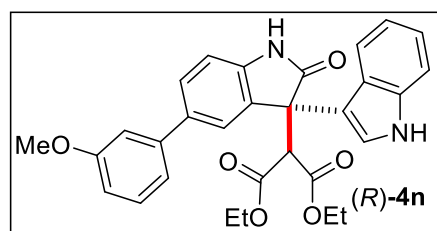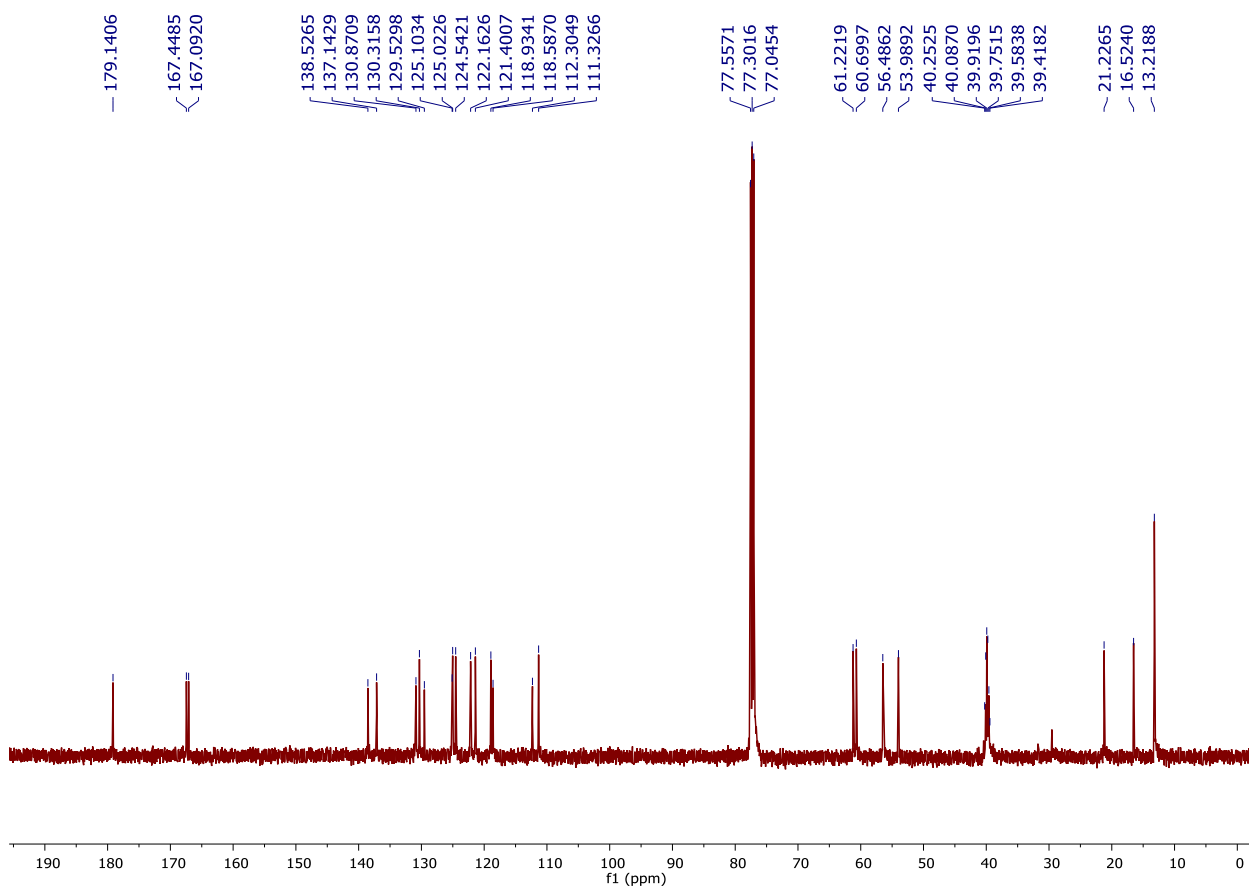

$^{13}\text{C}$  NMR (100 MHz, 0.4 mL  $\text{CDCl}_3$ , 0.1 mL  $\text{DMSO}-\text{D}_6$ ) of compound (R)-4n

## Display Report

## Analysis Info

Analysis Name D:\Data\user data\2016\July 2016\29-07-2016\Dr.A.Bisai-AB-KNB-03-303\_1-B.1\_01\_7002.d  
Method hrlcms-pos\_mid\_tune wide.m  
Sample Name Dr.A.Bisai-AB-KNB-03-303  
Comment

Acquisition Date 7/29/2016 3:18:56 PM

Operator DIMPLe

Instrument micrOTOF-Q II 10330

## Acquisition Parameter

|             |          |                       |           |                  |           |
|-------------|----------|-----------------------|-----------|------------------|-----------|
| Source Type | ESI      | Ion Polarity          | Positive  | Set Nebulizer    | 0.3 Bar   |
| Focus       | Active   | Set Capillary         | 4500 V    | Set Dry Heater   | 200 °C    |
| Scan Begin  | 50 m/z   | Set End Plate Offset  | -500 V    | Set Dry Gas      | 4.0 l/min |
| Scan End    | 3000 m/z | Set Collision Cell RF | 450.0 Vpp | Set Divert Valve | Waste     |

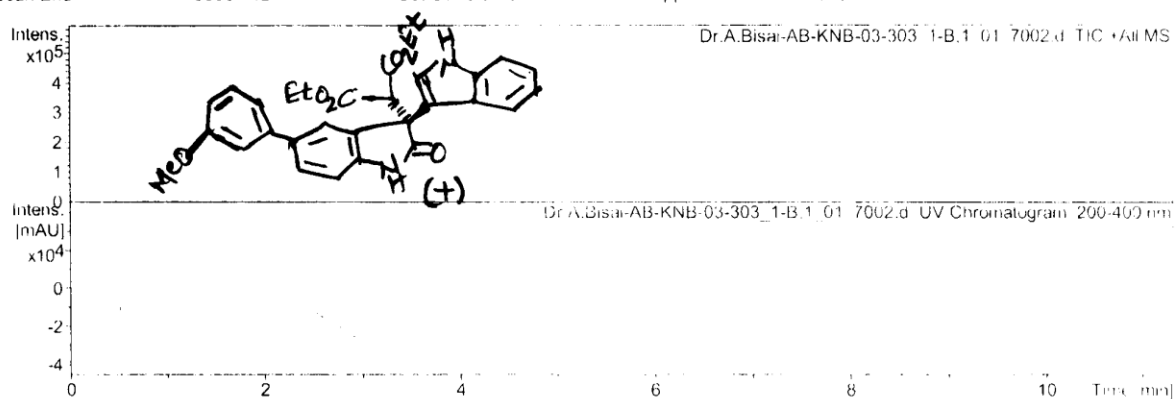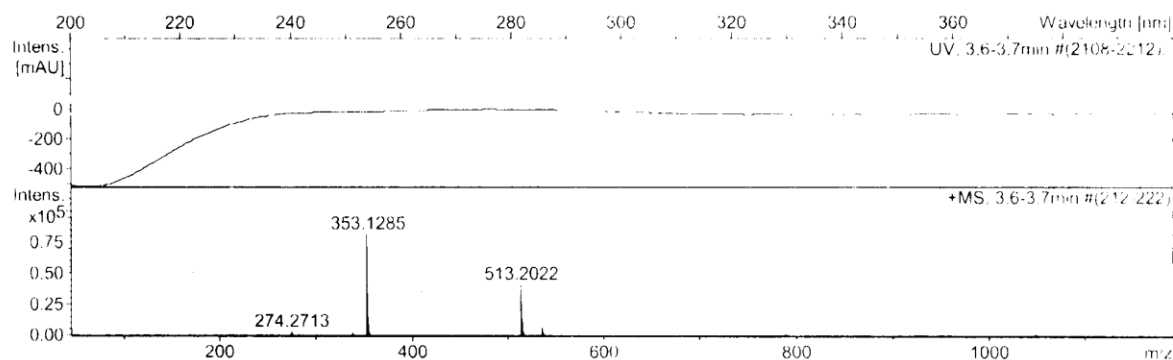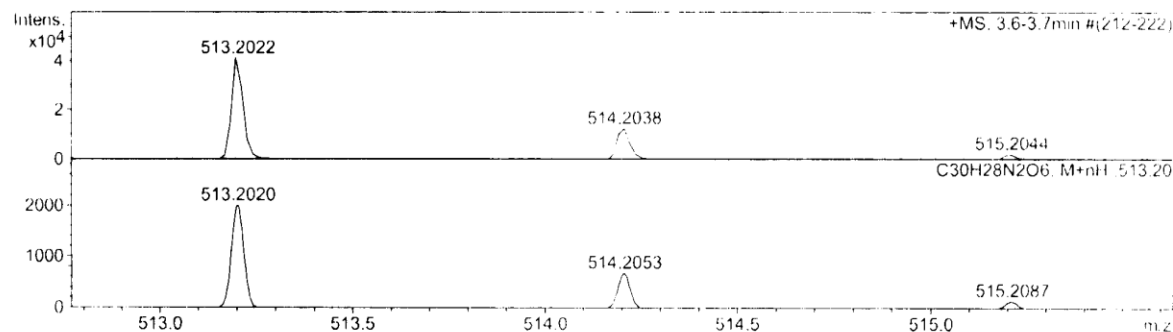

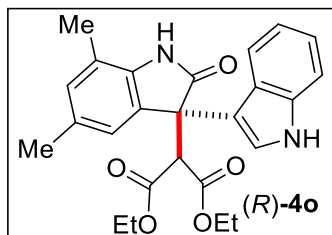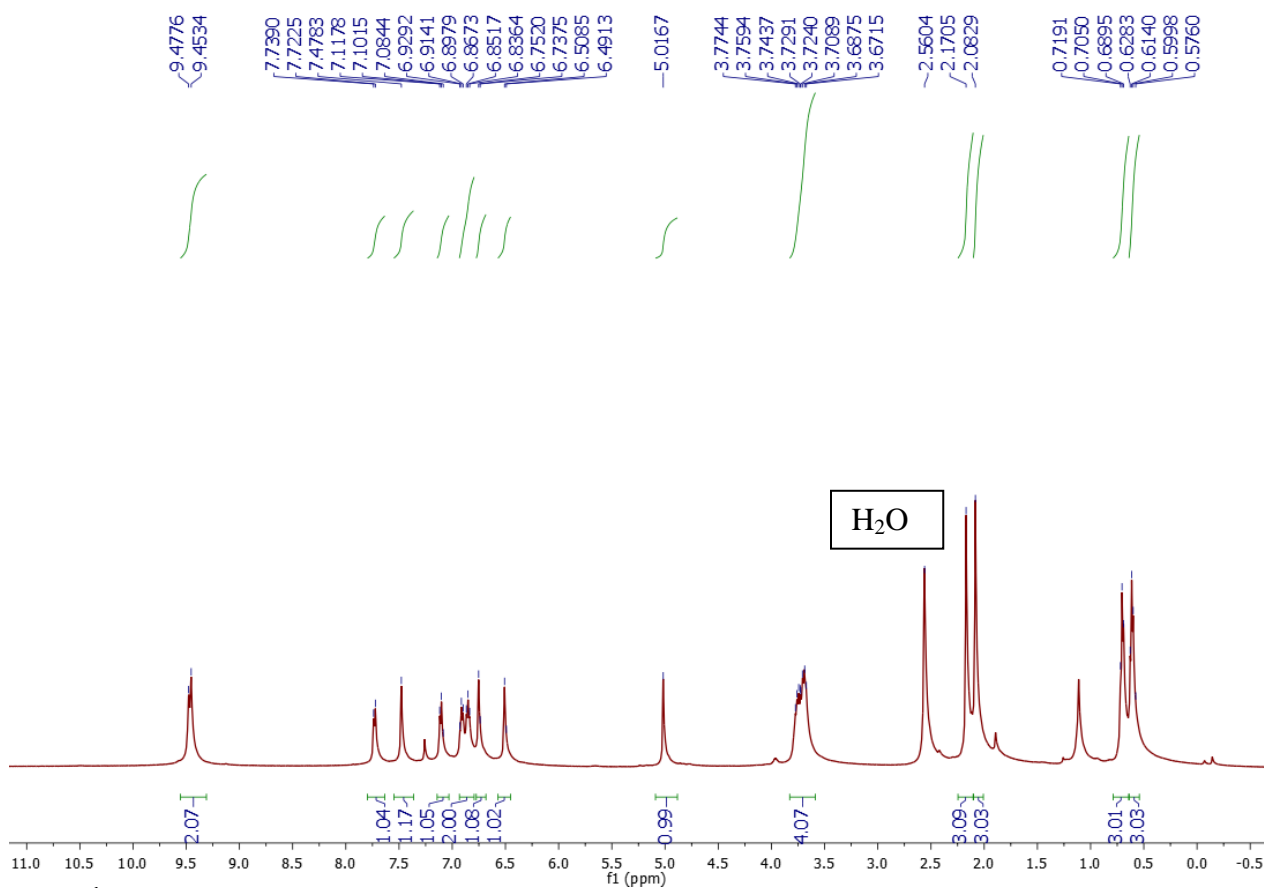

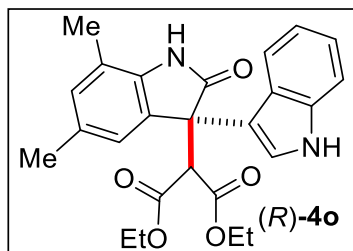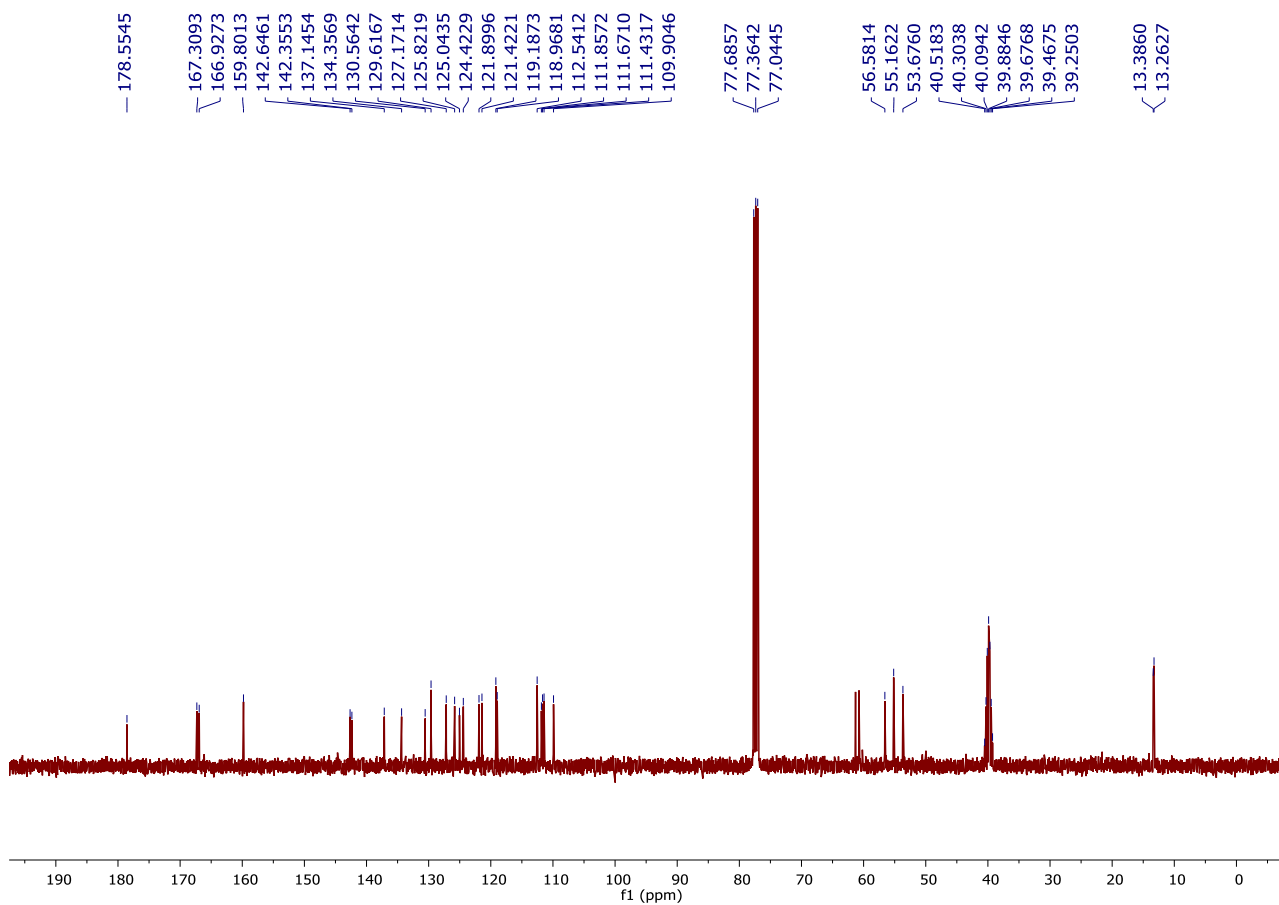

<sup>13</sup>C NMR (125 MHz, 0.4 mL CDCl<sub>3</sub>, 0.1 mL DMSO-D<sub>6</sub>) of compound **(R)-4o**

## Display Report

## Analysis Info

Analysis Name D:\Data\user data\2017\MAY 2017\24 may\Dr.A. Bisai-AB-KNB-03-280.d

Method tune\_wide.m

Sample Name AB-KNB-03-280

Comment

Acquisition Date 5/24/2017 4:29:39 PM

Operator RUCHI SHRIVASTAVA

Instrument micrOTOF-Q II 10330

## Acquisition Parameter

Source Type ESI  
Focus Not active  
Scan Begin 50 m/z  
Scan End 3000 m/zIon Polarity Positive  
Set Capillary 4500 V  
Set End Plate Offset -500 V  
Set Collision Cell RF 600.0 VppSet Nebulizer 0.4 Bar  
Set Dry Heater 180 °C  
Set Dry Gas 4.0 l/min  
Set Divert Valve Waste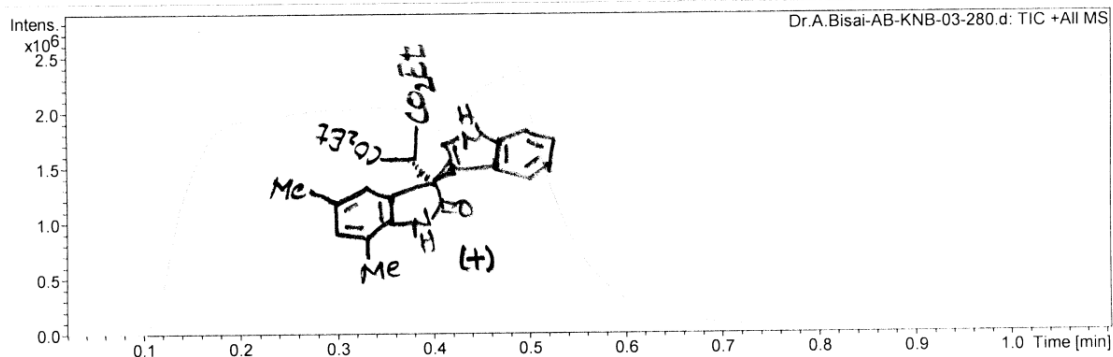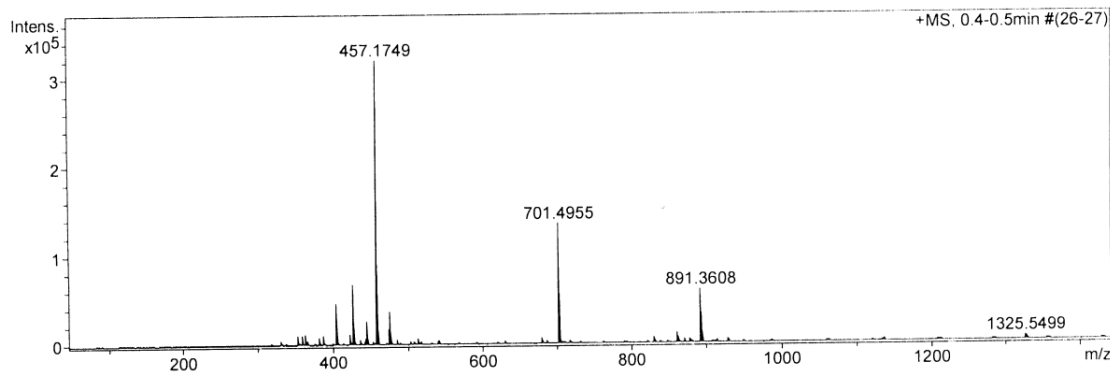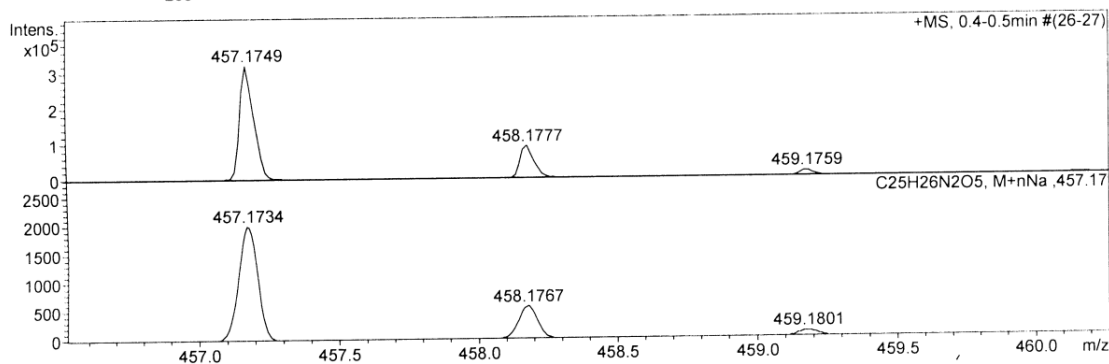



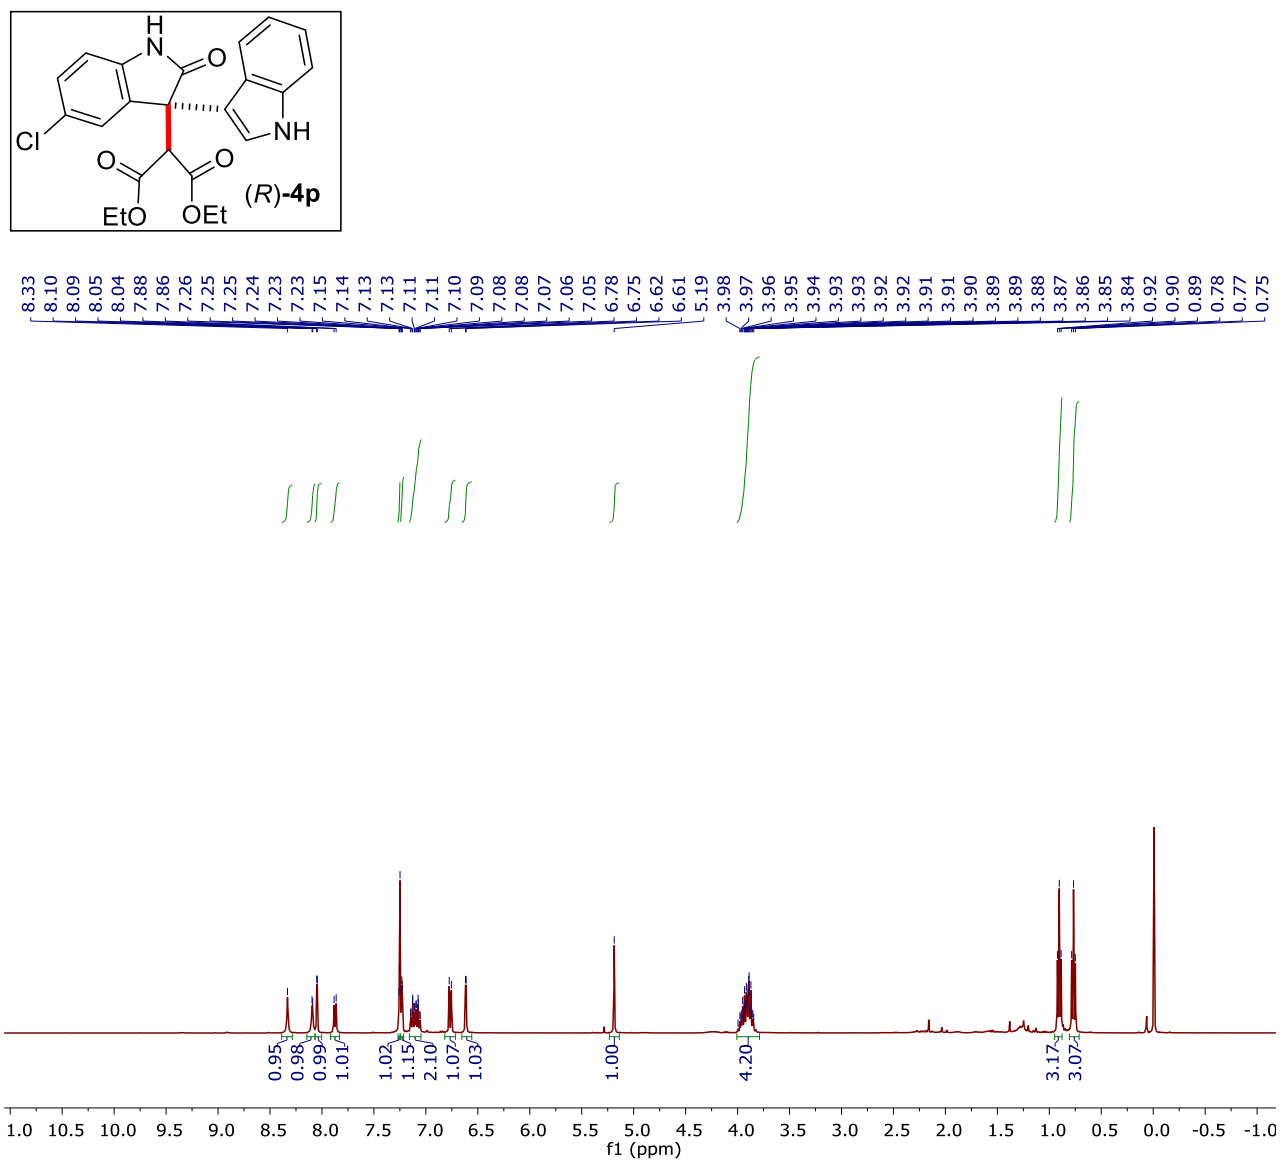

$^1\text{H}$  NMR (500 MHz, 0.4 mL  $\text{CDCl}_3$ ) of compound **(R)-4p**

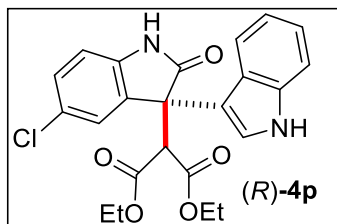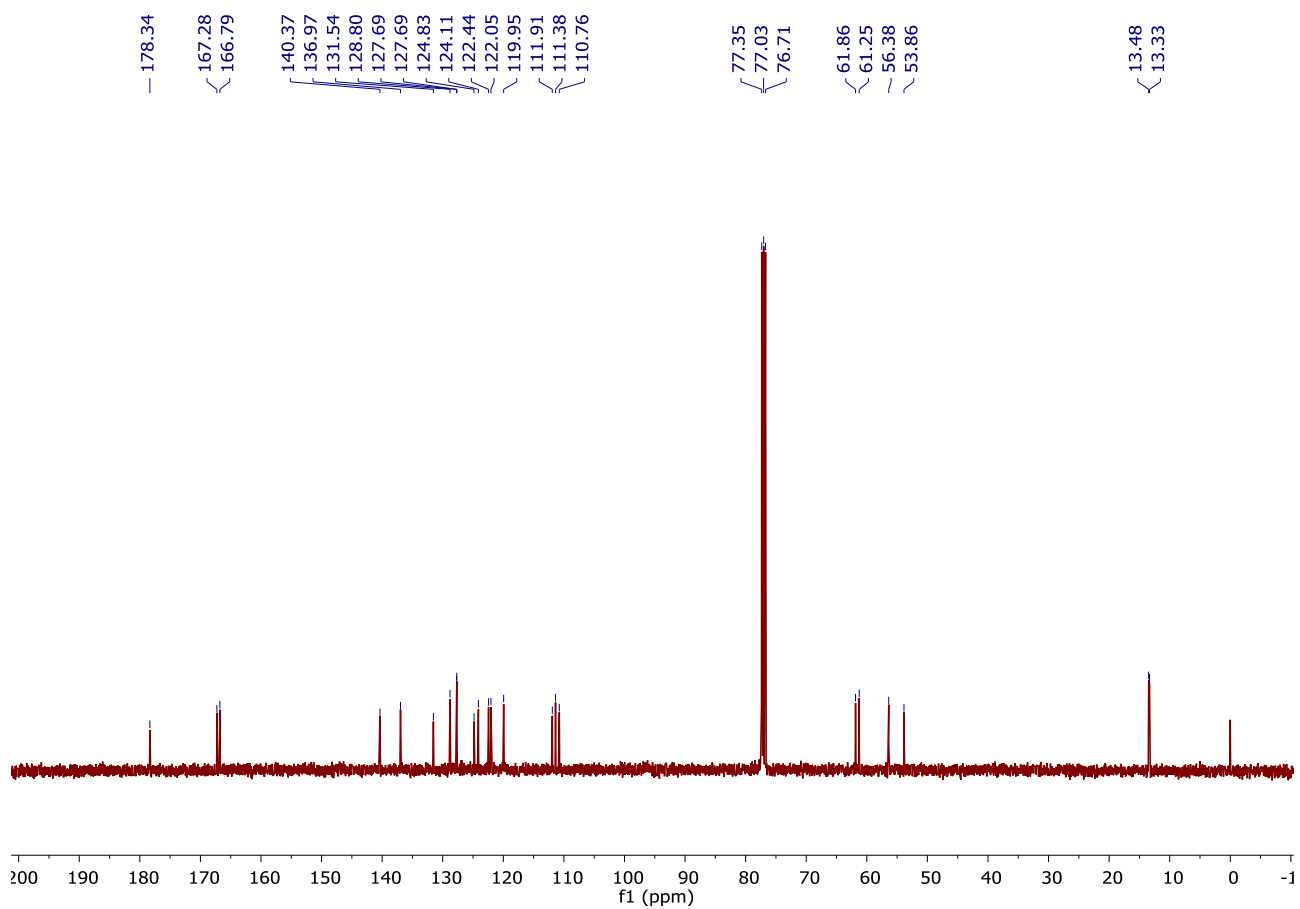

$^{13}\text{C}$  NMR (125 MHz, 0.4 mL  $\text{CDCl}_3$ ) of compound (R)-4p

## Display Report

## Analysis Info

Analysis Name D:\Data\user data\2016\July 2016\29-07-2016\Dr.A.Bisai-AB-KNB-03-207\_1-A,4\_01\_6991.d  
Method hrlcms-pos\_mid\_tune wide.m  
Sample Name Dr.A.Bisai-AB-KNB-03-207  
Comment

Acquisition Date 7/29/2016 1:11:26 PM

Operator DIMPLE

Instrument micrOTOF-Q II 10330

## Acquisition Parameter

|             |          |                       |           |                  |           |
|-------------|----------|-----------------------|-----------|------------------|-----------|
| Source Type | ESI      | Ion Polarity          | Positive  | Set Nebulizer    | 0.3 Bar   |
| Focus       | Active   | Set Capillary         | 4500 V    | Set Dry Heater   | 200 °C    |
| Scan Begin  | 50 m/z   | Set End Plate Offset  | -500 V    | Set Dry Gas      | 4.0 l/min |
| Scan End    | 3000 m/z | Set Collision Cell RF | 450.0 Vpp | Set Divert Valve | Waste     |

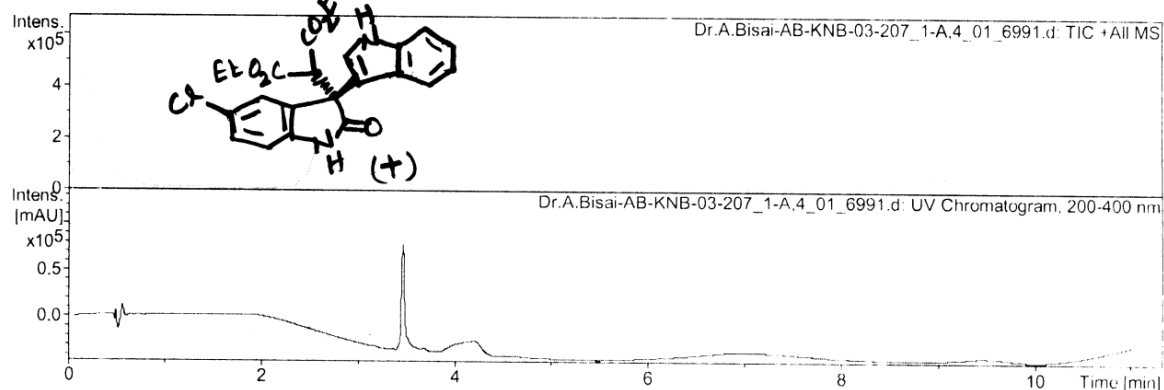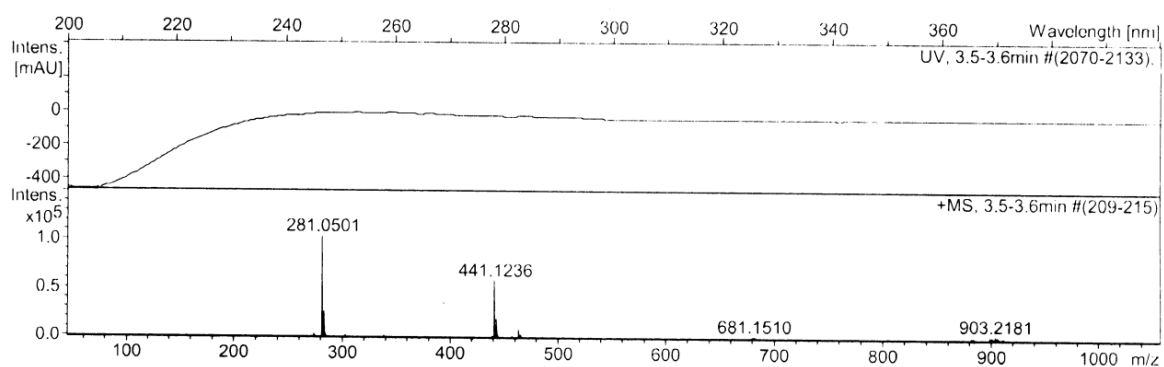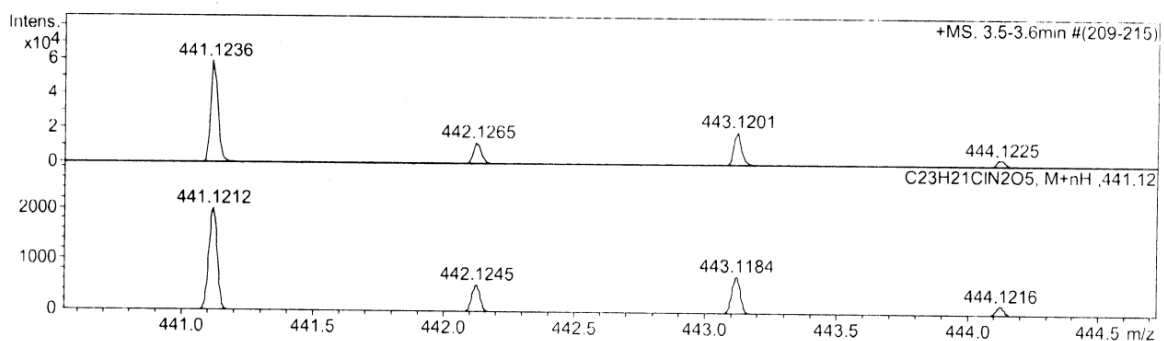

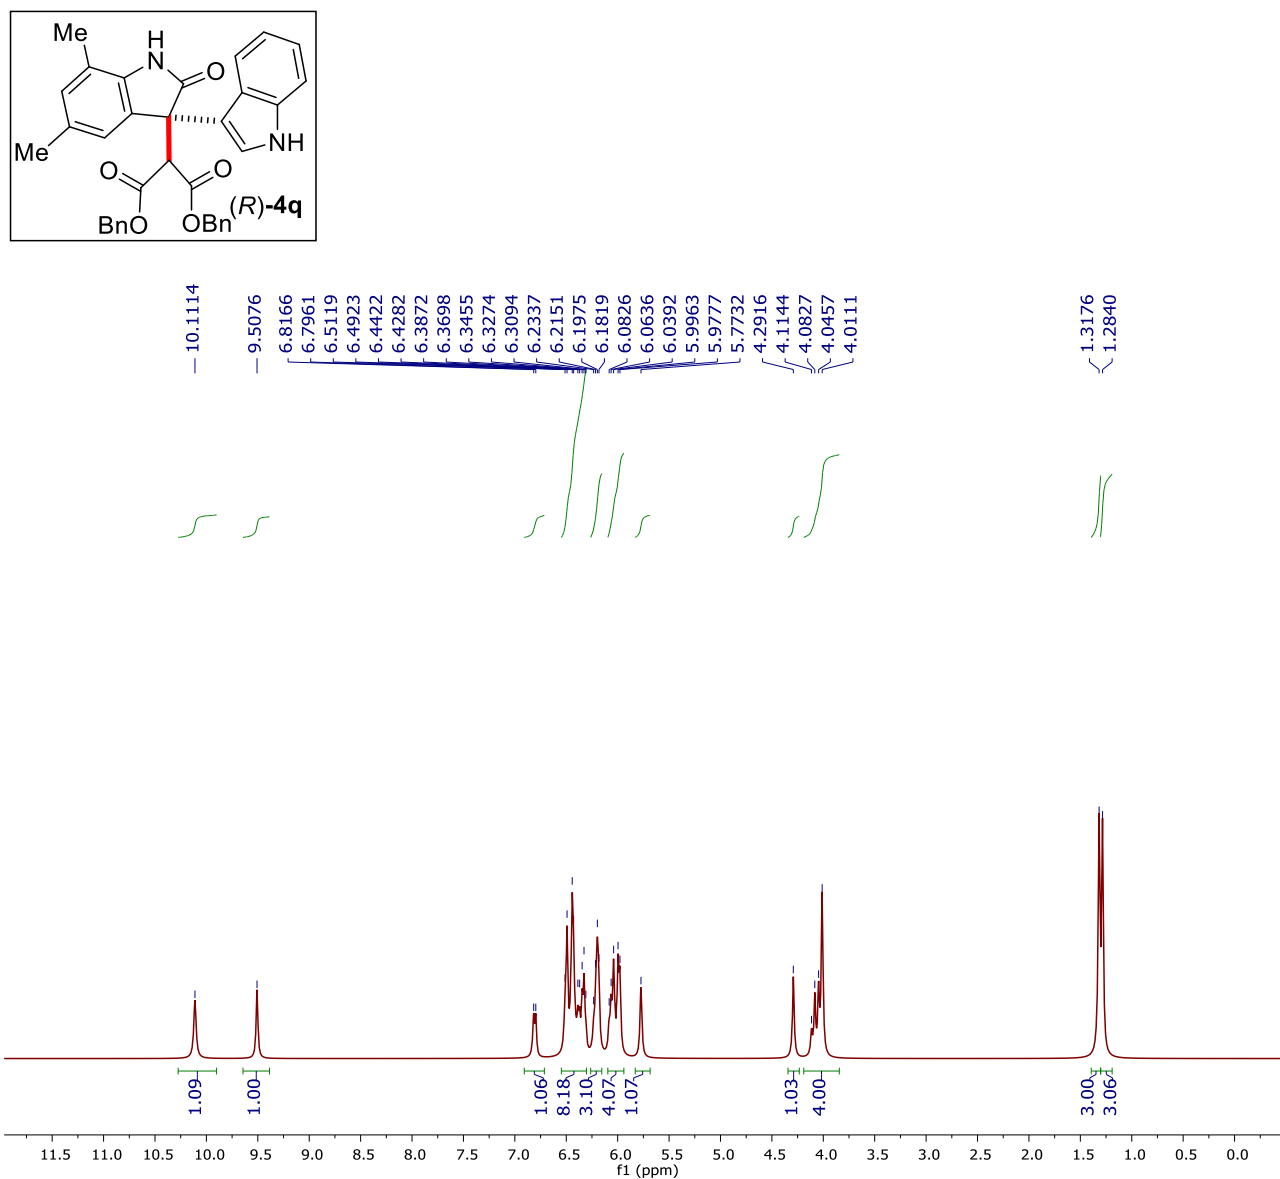

$^1\text{H}$  NMR (400 MHz,  $\text{DMSO-D}_6$ ) of compound **(R)-4q**

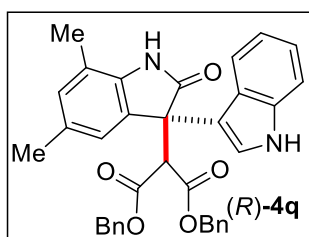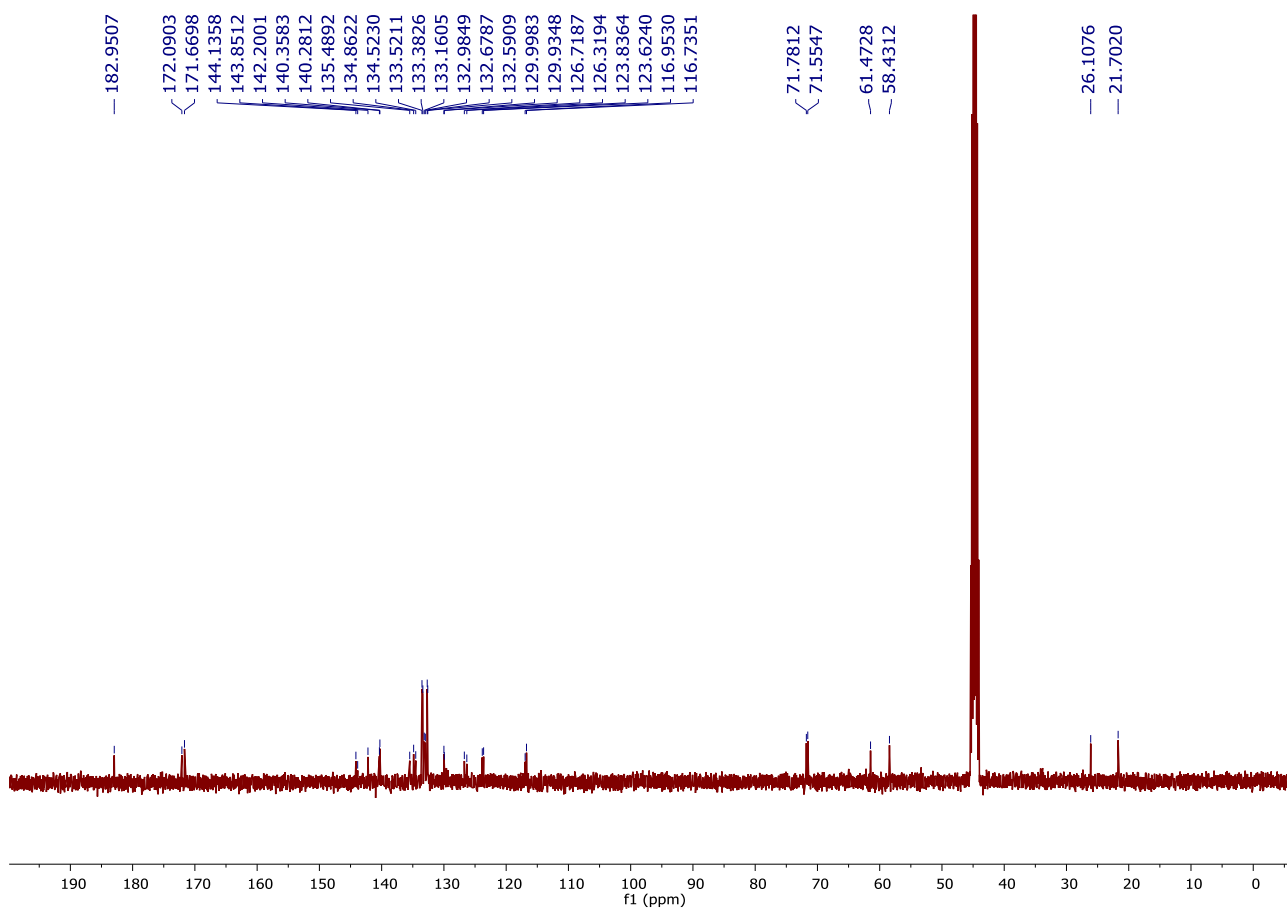

<sup>13</sup>C NMR (100 MHz, DMSO-D<sub>6</sub>) of compound (*R*)-**4q**

## Display Report

## Analysis Info

|               |                                                                   |                  |                      |
|---------------|-------------------------------------------------------------------|------------------|----------------------|
| Analysis Name | D:\Data\user data\2017\MAY 2017\24 may\Dr.A.Bisai-AB-KNB-03-310.d | Acquisition Date | 5/24/2017 4:31:49 PM |
| Method        | tune_wide.m                                                       | Operator         | RUCHI SHRIVASTAVA    |
| Sample Name   | AB-KNB-03-310                                                     | Instrument       | micrOTOF-Q II 10330  |
| Comment       |                                                                   |                  |                      |

## Acquisition Parameter

|             |            |                       |           |                  |           |
|-------------|------------|-----------------------|-----------|------------------|-----------|
| Source Type | ESI        | Ion Polarity          | Positive  | Set Nebulizer    | 0.4 Bar   |
| Focus       | Not active | Set Capillary         | 4500 V    | Set Dry Heater   | 180 °C    |
| Scan Begin  | 50 m/z     | Set End Plate Offset  | -500 V    | Set Dry Gas      | 4.0 l/min |
| Scan End    | 3000 m/z   | Set Collision Cell RF | 600.0 Vpp | Set Divert Valve | Waste     |

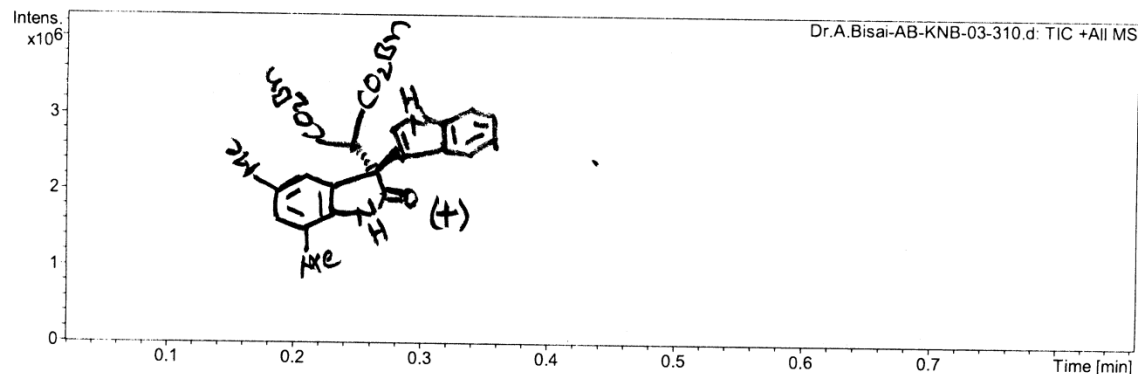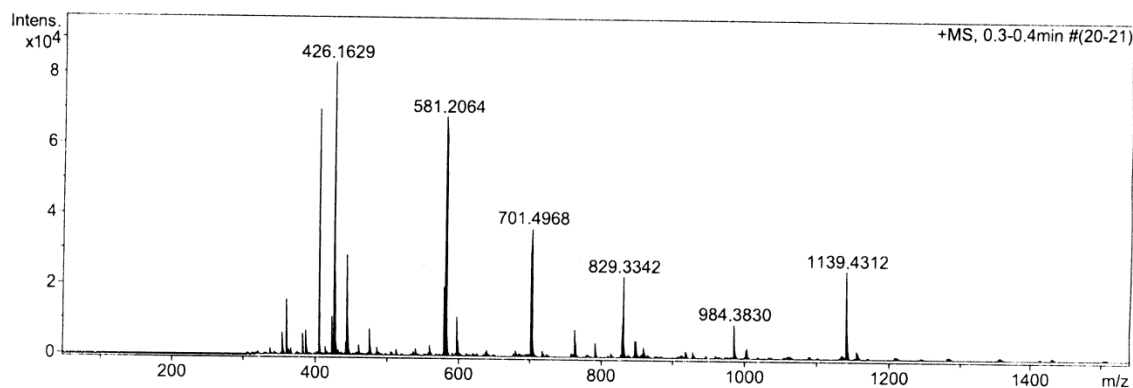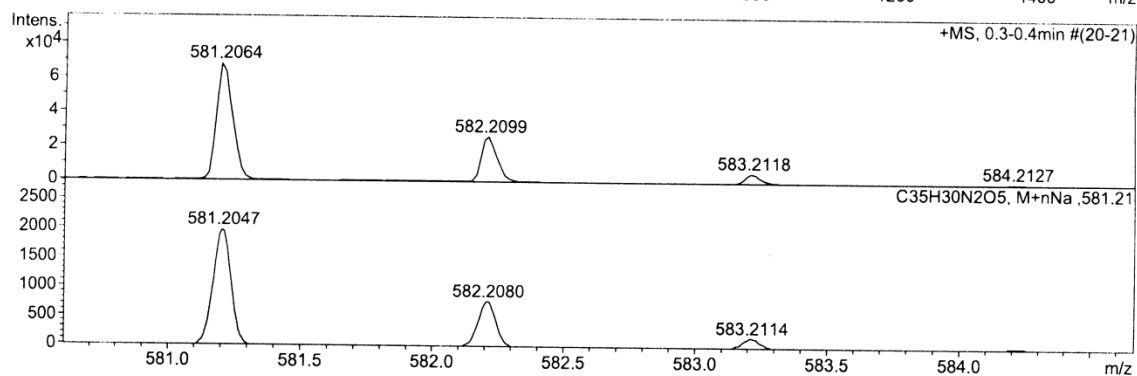

Scanned copy of mass spectrum of (R)-4q

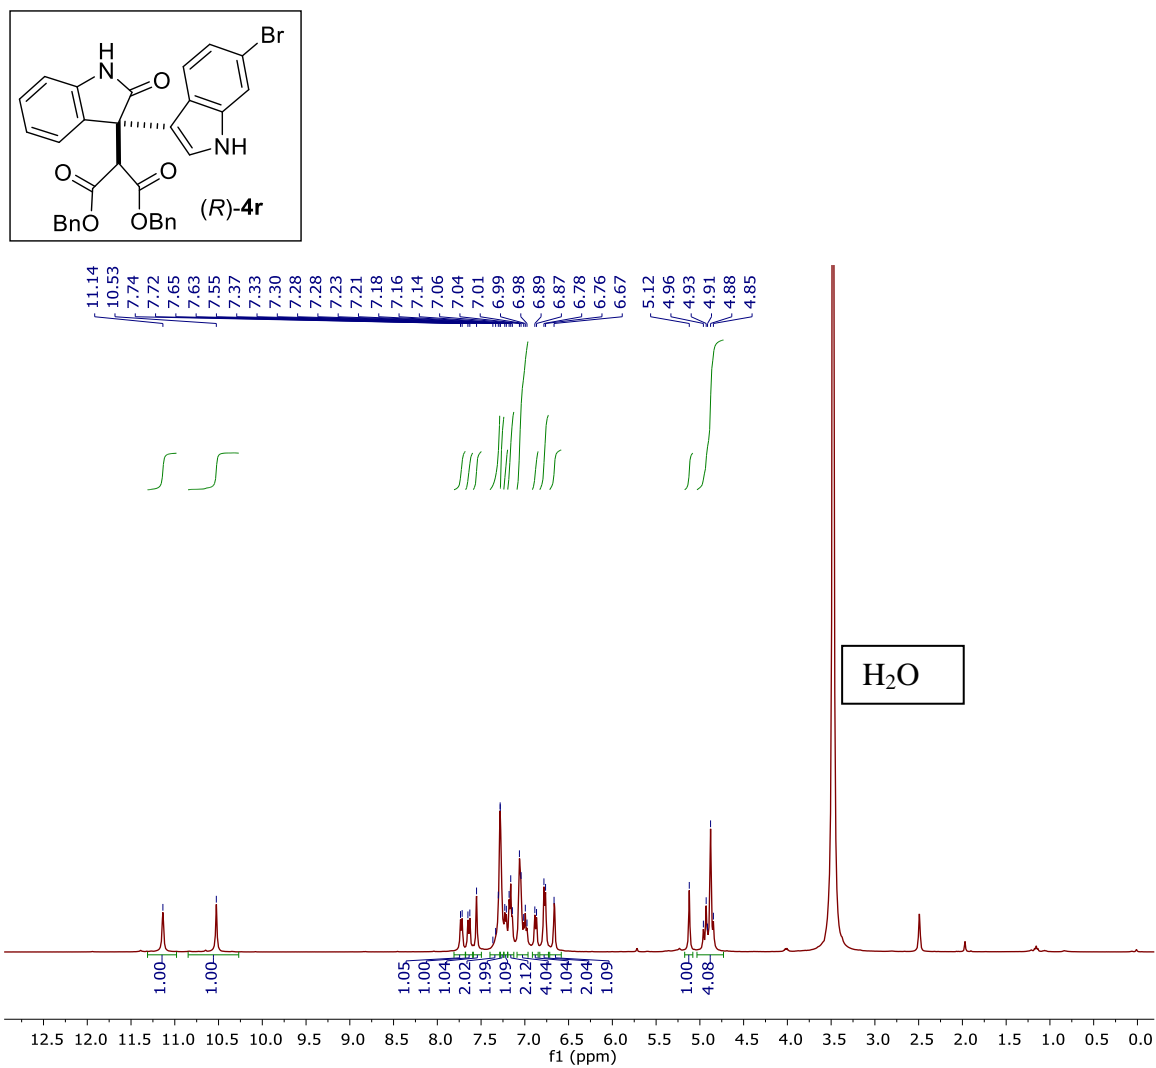

<sup>1</sup>H NMR (400 MHz, DMSO-D<sub>6</sub>) of compound (*R*)-**4r**

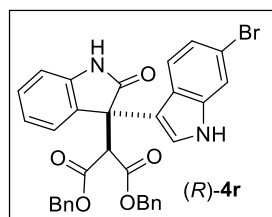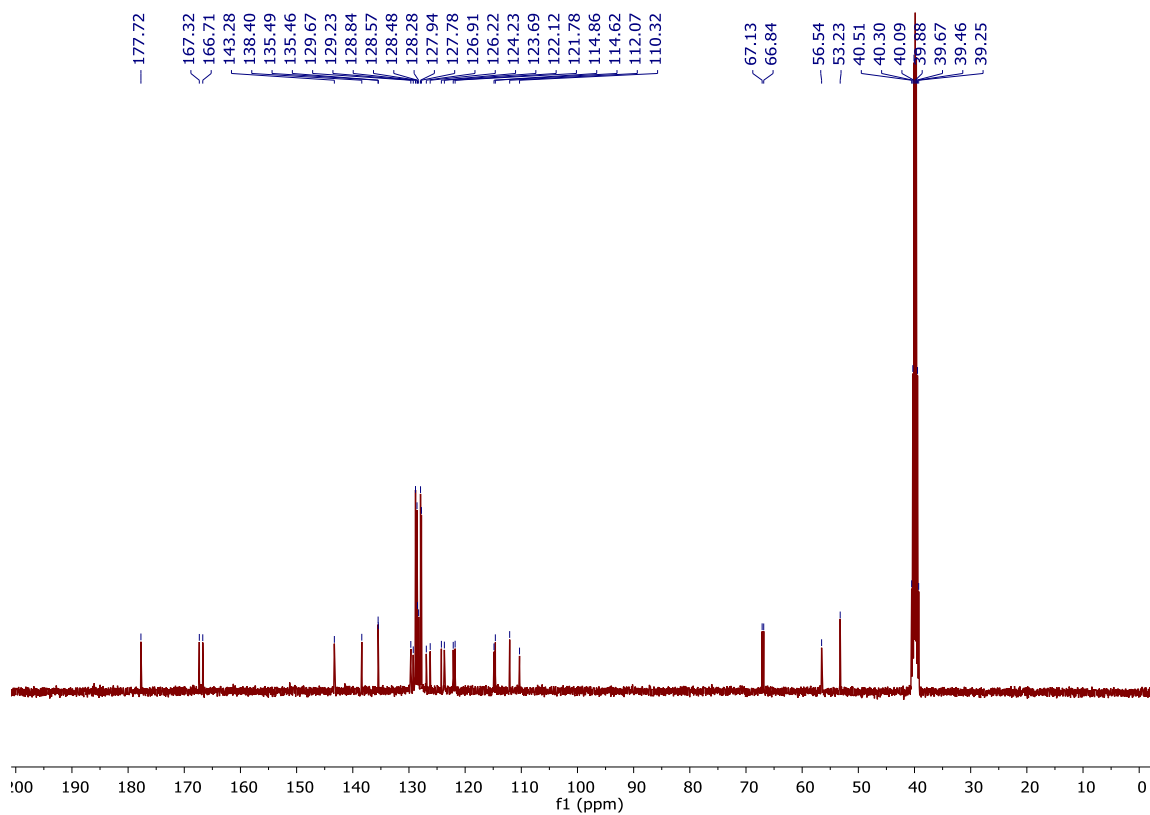

$^{13}\text{C}$  NMR (100 MHz, DMSO- $\text{D}_6$ ) of compound **(R)-4r**



## Display Report

## Analysis Info

Analysis Name D:\Data\NEW USER DATA 2017\2018\May-2018\08-05-2018\Dr A Bisai-KNB-05-112-R\_1-B,1\_01\_1628.d  
Method hrlcms-20 sept.m  
Sample Name Dr A Bisai-KNB-05-112-R  
Comment

Acquisition Date 5/8/2018 12:26:17 PM

Operator RUCHI

Instrument micrOTOF-Q II 10330

## Acquisition Parameter

|             |          |                       |           |                  |           |
|-------------|----------|-----------------------|-----------|------------------|-----------|
| Source Type | ESI      | Ion Polarity          | Positive  | Set Nebulizer    | 1.2 Bar   |
| Focus       | Active   | Set Capillary         | 4500 V    | Set Dry Heater   | 200 °C    |
| Scan Begin  | 50 m/z   | Set End Plate Offset  | -500 V    | Set Dry Gas      | 7.0 l/min |
| Scan End    | 3000 m/z | Set Collision Cell RF | 130.0 Vpp | Set Divert Valve | Waste     |

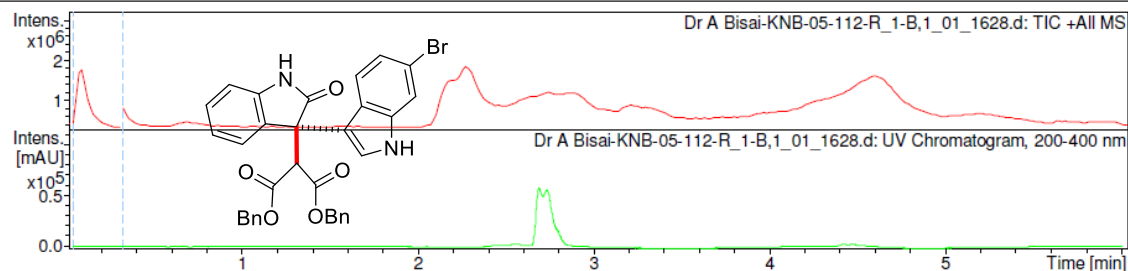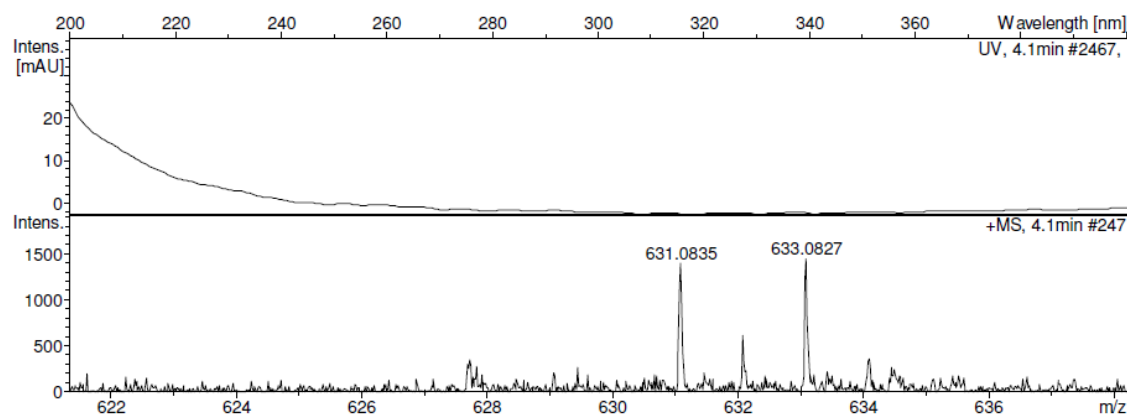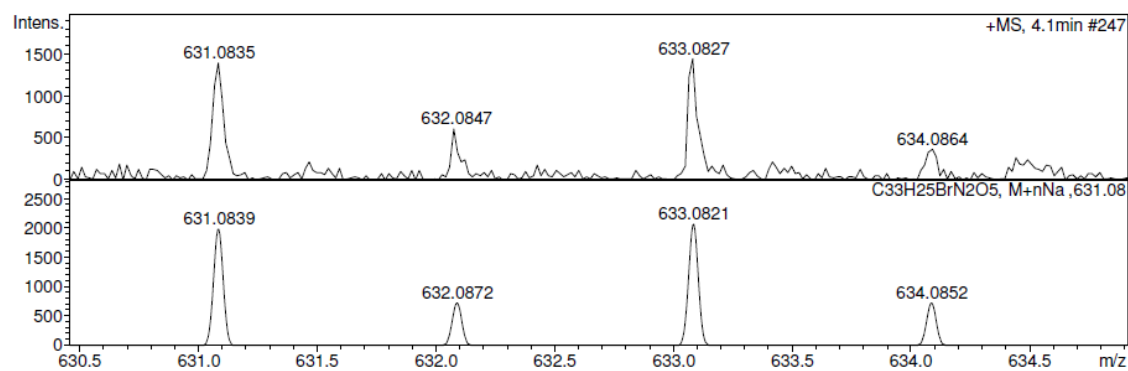

Mass spectrum of (R)-4r

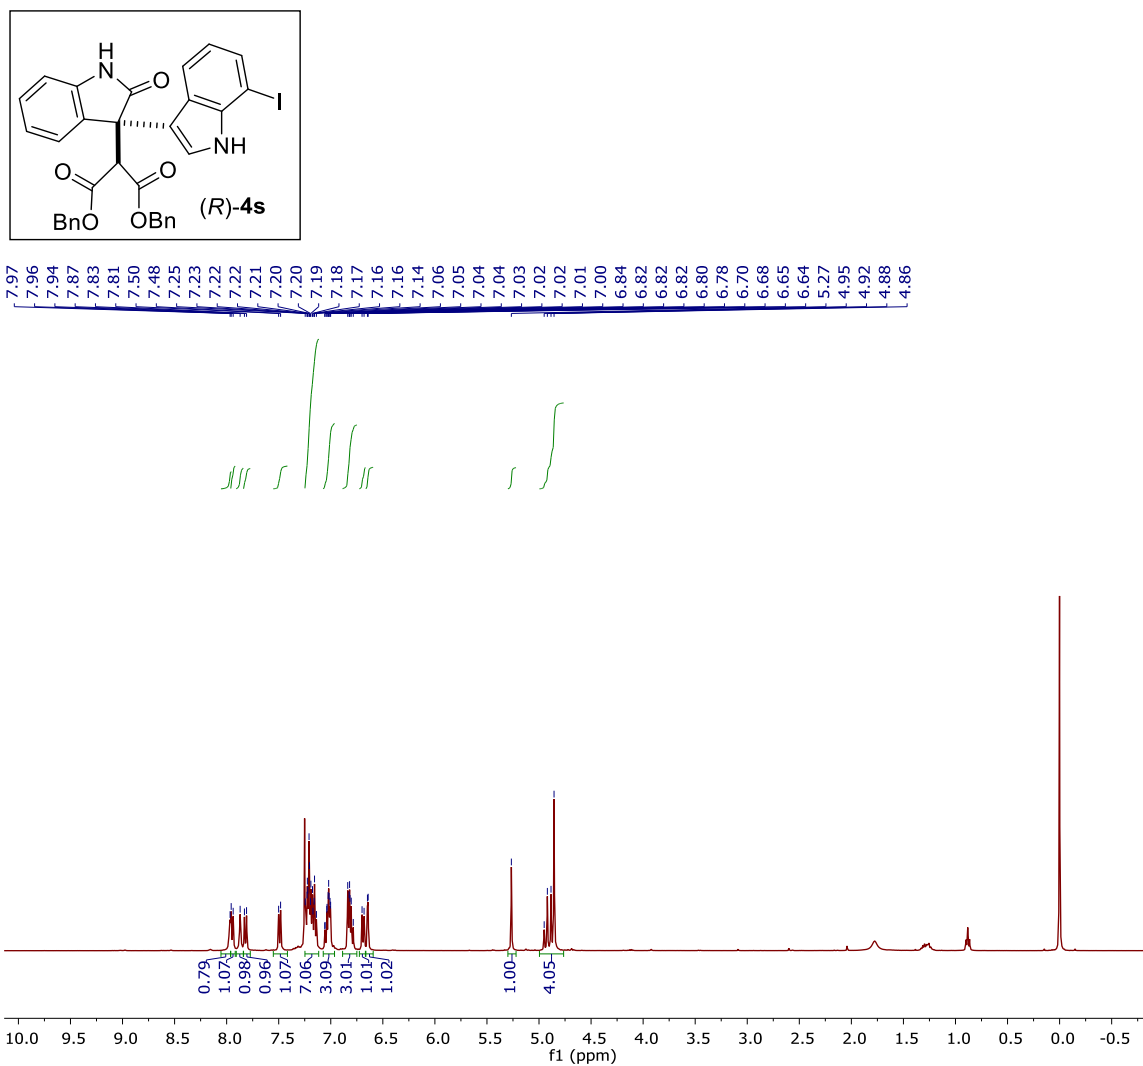

$^1\text{H}$  NMR (400 MHz,  $\text{CDCl}_3$ ) of compound (R)-4s

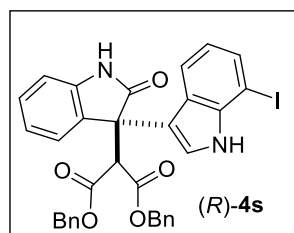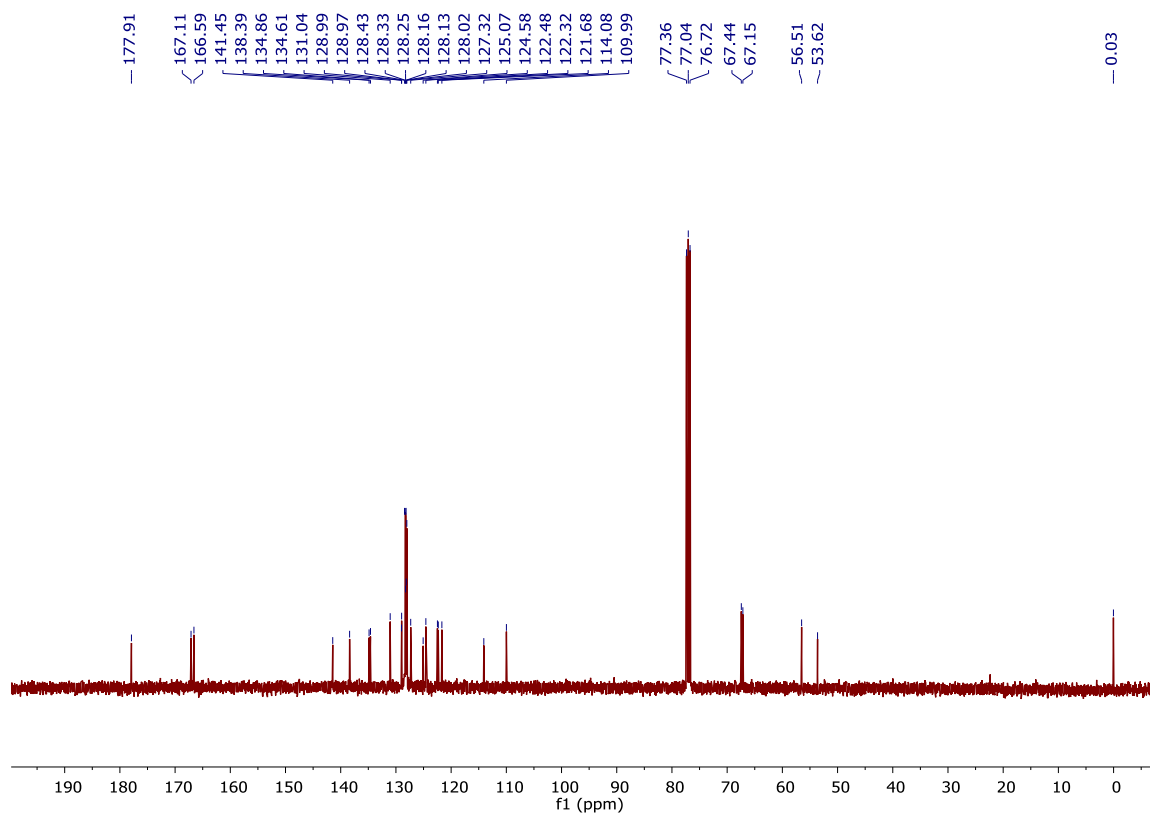

$^{13}\text{C}$  NMR (100 MHz,  $\text{CDCl}_3$ ) of compound **(R)-4s**

## Display Report

## Analysis Info

Analysis Name D:\Data\NEW USER DATA 2017\2018\May-2018\11-05-2018\Dr A Bisai-KNB-05-122\_1-B,8\_01\_1724.d  
Method hrlcms-20 sept.m  
Sample Name Dr A Bisai-KNB-05-122  
Comment

Acquisition Date 5/11/2018 12:36:05 PM  
Operator RUCHI  
Instrument micrOTOF-Q II 10330

## Acquisition Parameter

|             |          |                       |           |                  |           |
|-------------|----------|-----------------------|-----------|------------------|-----------|
| Source Type | ESI      | Ion Polarity          | Positive  | Set Nebulizer    | 1.2 Bar   |
| Focus       | Active   | Set Capillary         | 4500 V    | Set Dry Heater   | 200 °C    |
| Scan Begin  | 50 m/z   | Set End Plate Offset  | -500 V    | Set Dry Gas      | 7.0 l/min |
| Scan End    | 3000 m/z | Set Collision Cell RF | 130.0 Vpp | Set Divert Valve | Waste     |

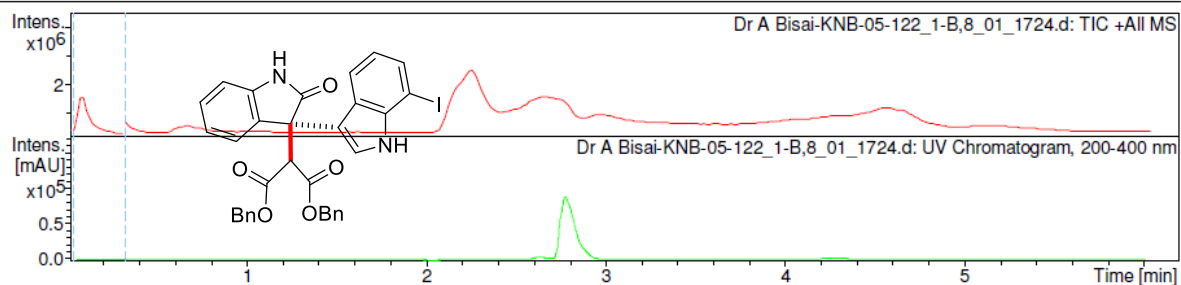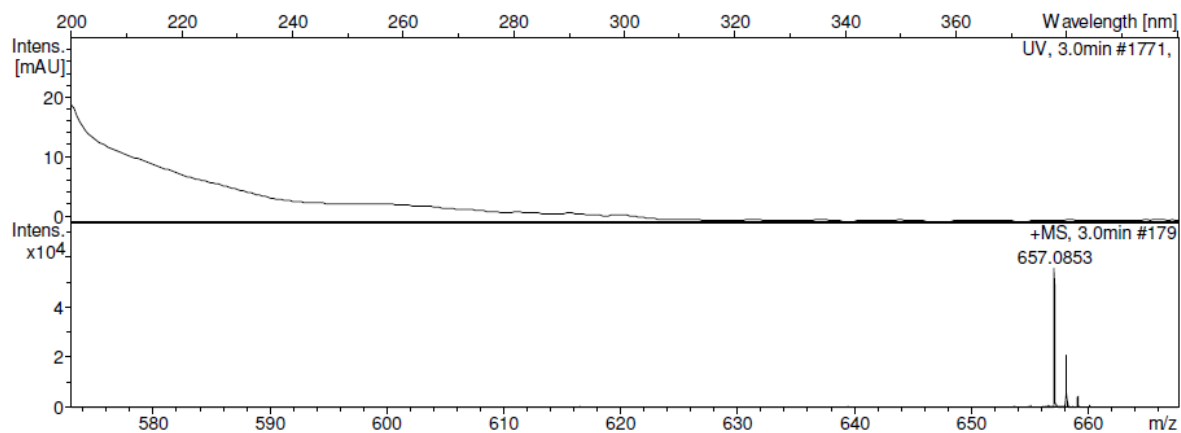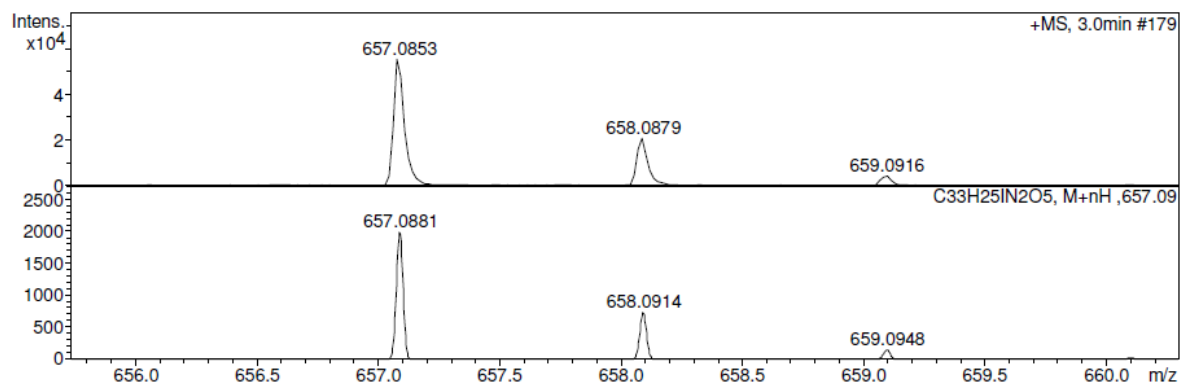

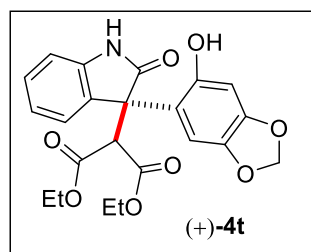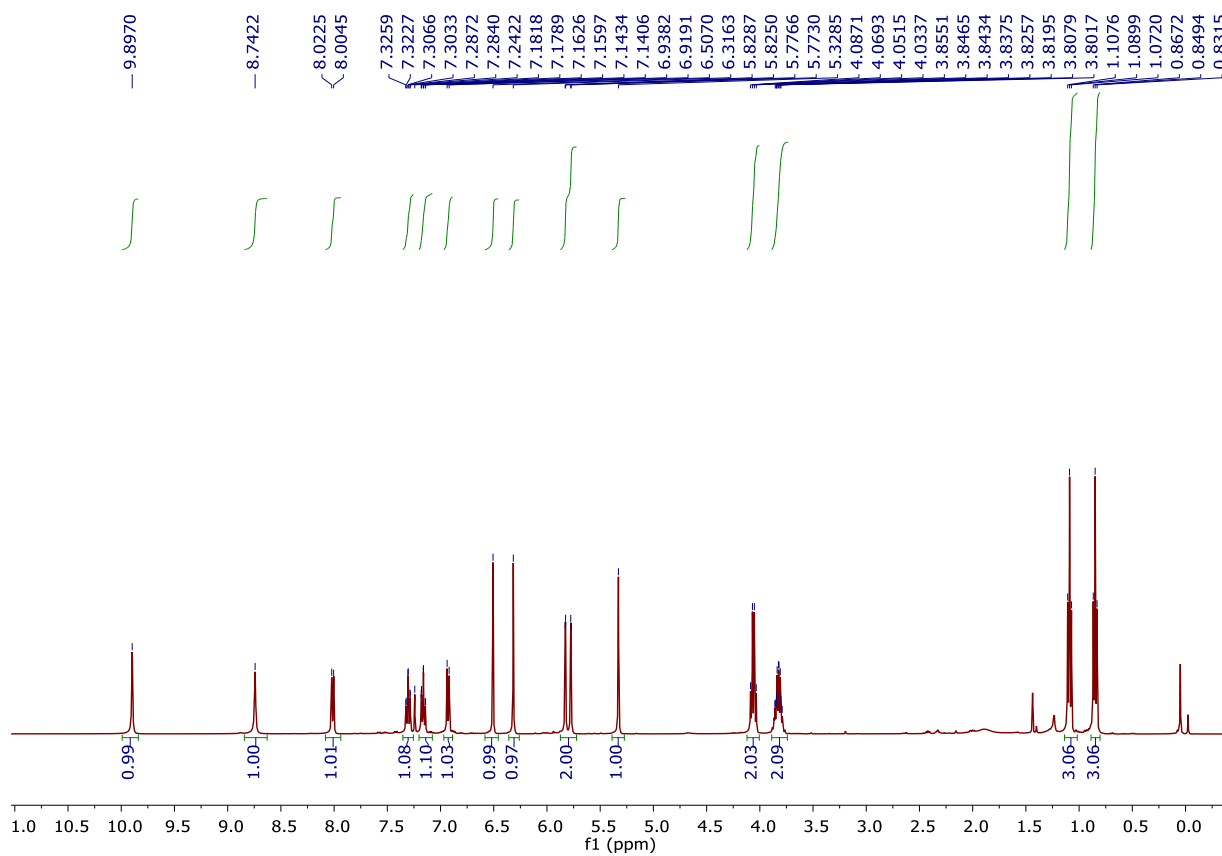

$^1\text{H}$  NMR (400 MHz,  $\text{CDCl}_3$ ) of compound (+)-**4t**

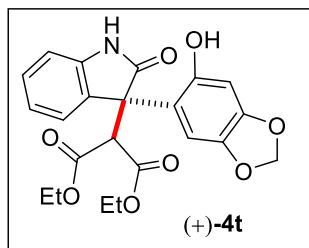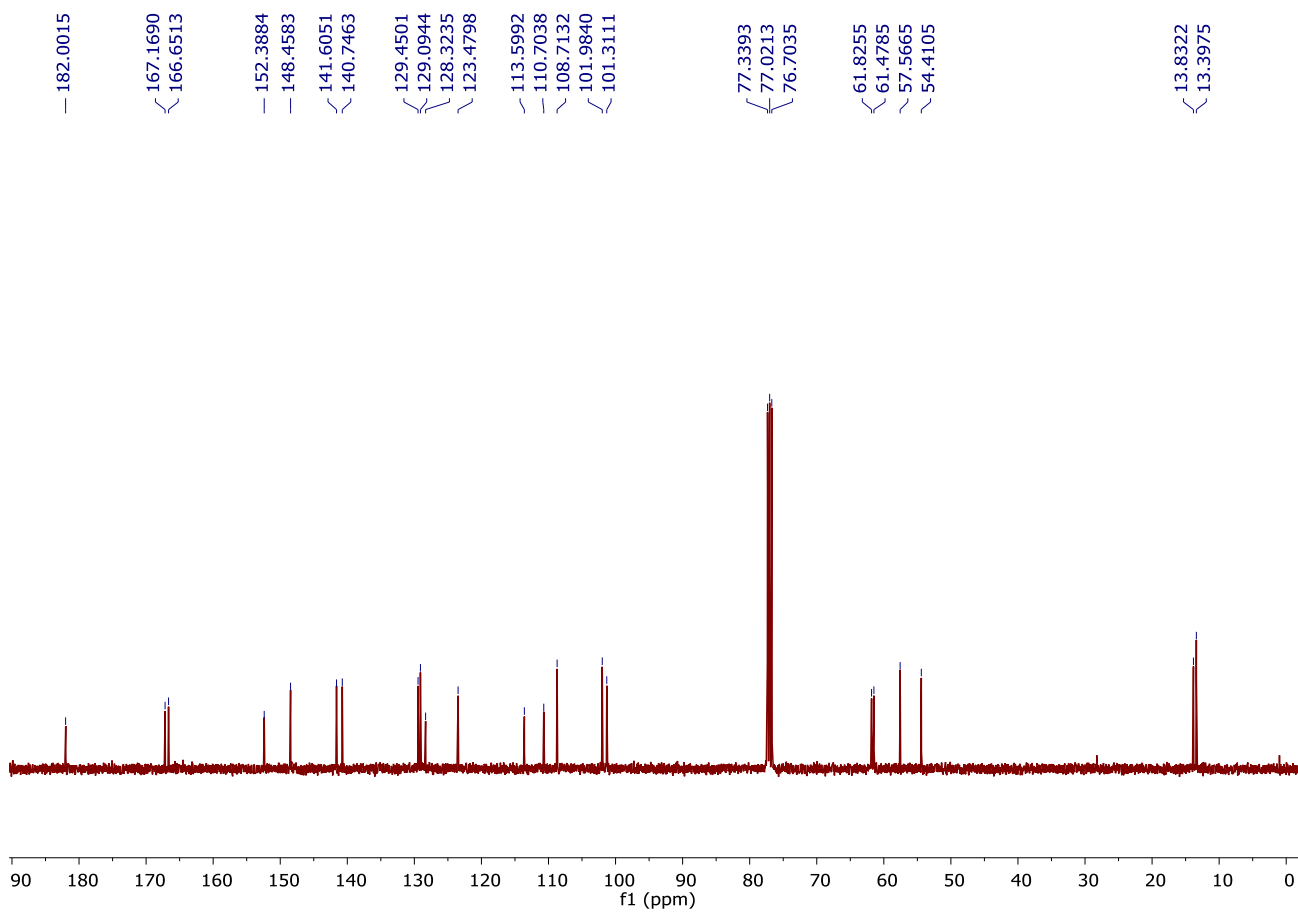

$^{13}\text{C}$  NMR (100 MHz, DMSO- $\text{D}_6$ ) of compound (+)-**4t**

## Display Report

## Analysis Info

Analysis Name D:\Data\user data\2017\JUNE 2017\03 JUNE\AB-KNB-060\_1-A,8\_01\_1802.d  
Method hrlcms\_pos\_mid\_tunemix.m  
Sample Name AB-KNB-060  
Comment

Acquisition Date 5/5/2017 11:40:37 AM  
Operator RUCHI SHRIVASTAVA  
Instrument micrOTOF-Q II 10330

## Acquisition Parameter

|             |          |                       |           |                  |           |
|-------------|----------|-----------------------|-----------|------------------|-----------|
| Source Type | ESI      | Ion Polarity          | Positive  | Set Nebulizer    | 0.3 Bar   |
| Focus       | Active   | Set Capillary         | 4500 V    | Set Dry Heater   | 200 °C    |
| Scan Begin  | 50 m/z   | Set End Plate Offset  | -500 V    | Set Dry Gas      | 4.0 l/min |
| Scan End    | 3000 m/z | Set Collision Cell RF | 450.0 Vpp | Set Divert Valve | Waste     |

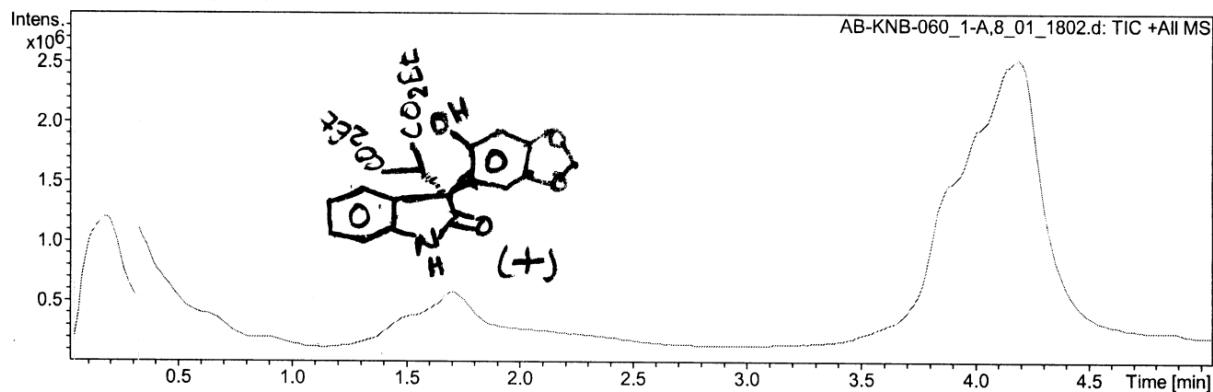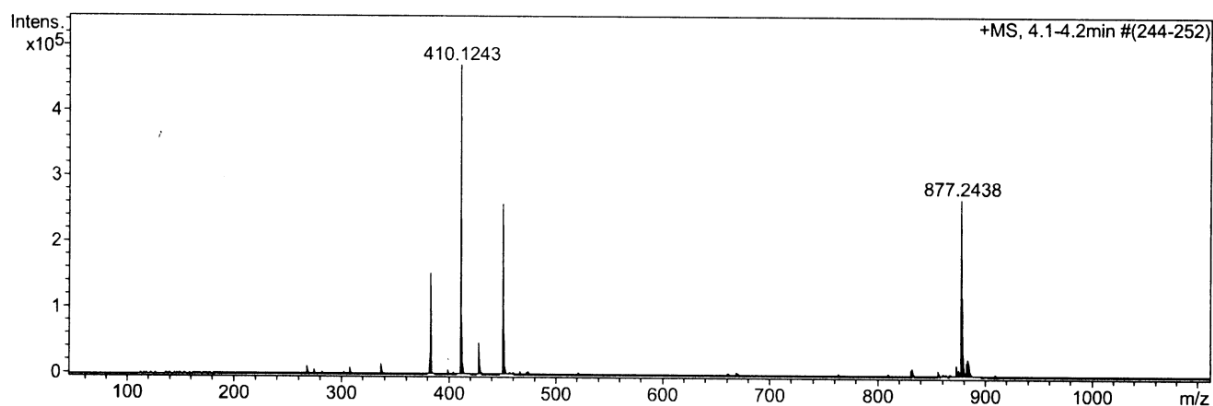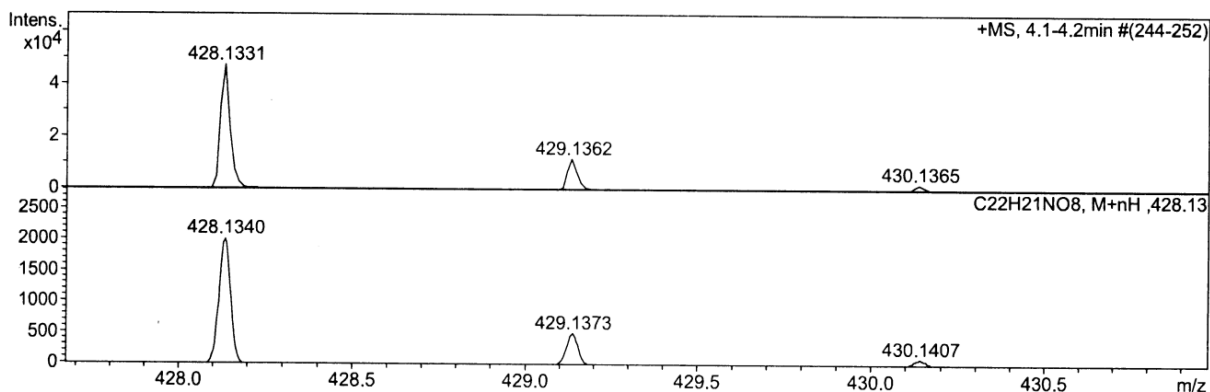

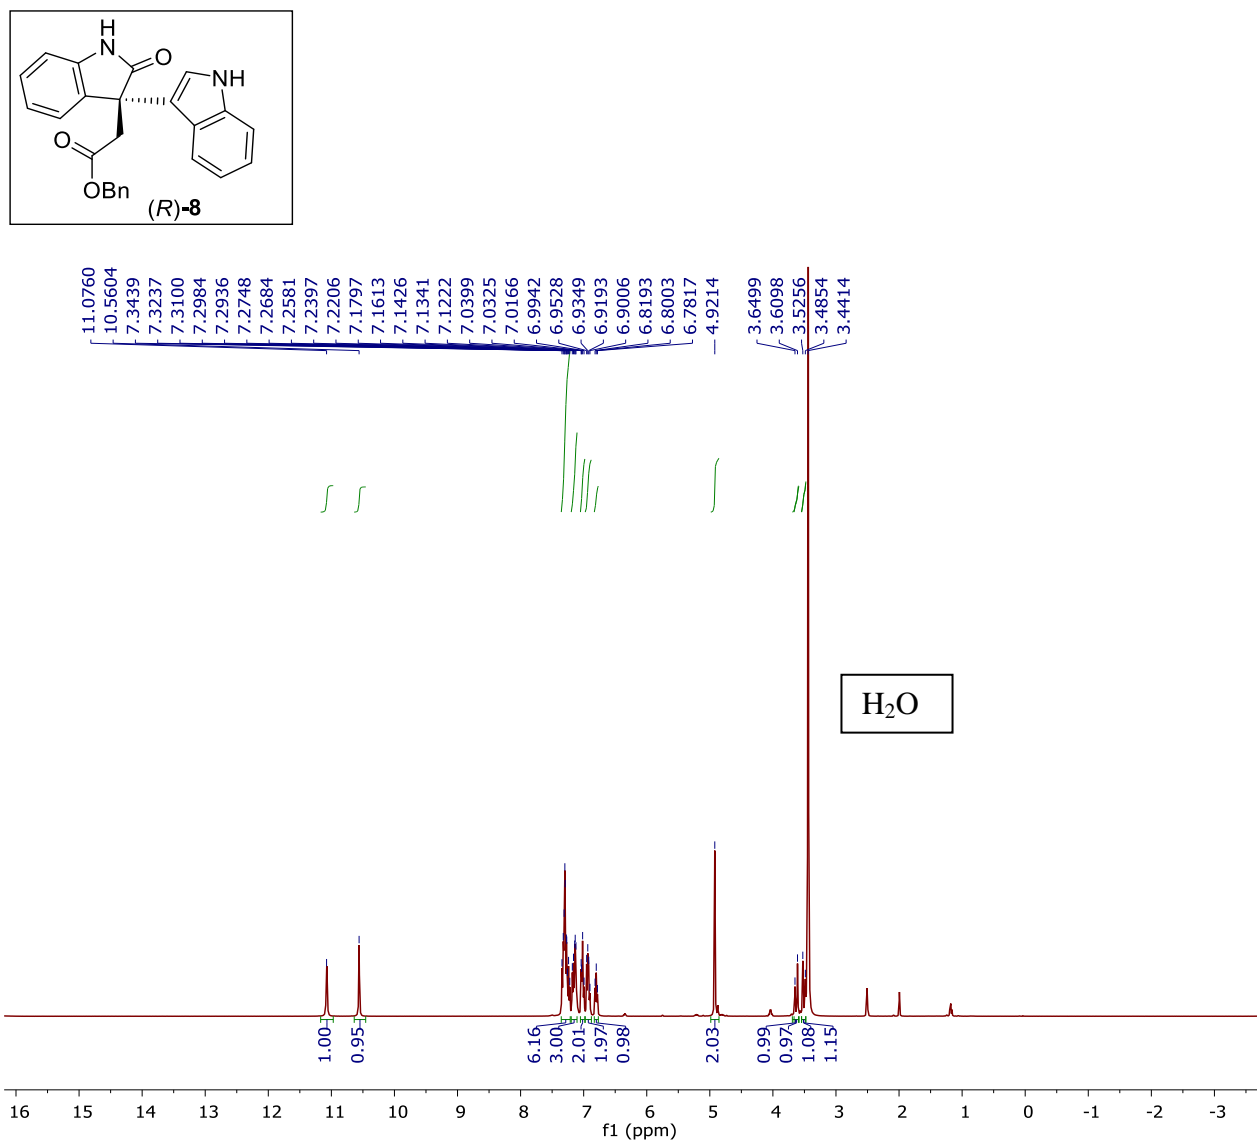

<sup>1</sup>H NMR (400 MHz, DMSO-D<sub>6</sub>) of compound (R)-**8**



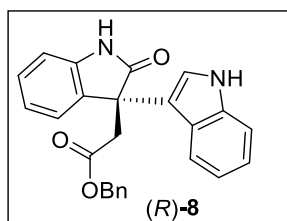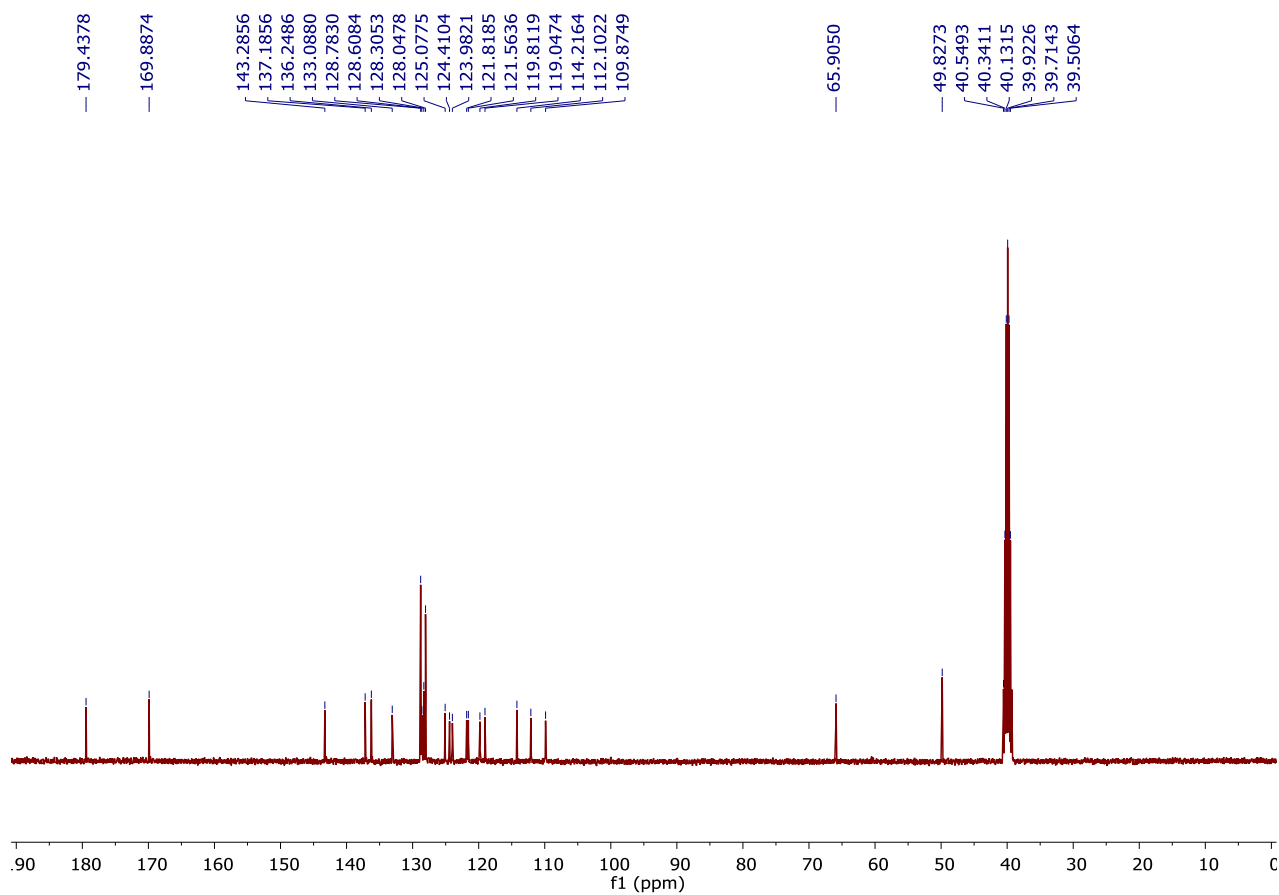

$^{13}\text{C}$  NMR (400 MHz,  $\text{DMSO-D}_6$ ) of compound **(R)-8**

## Display Report

## Analysis Info

Analysis Name D:\Data\NEW USER DATA 2017\17 oct\Dr.A.BISAI-AB-KNB-03-168-R.d  
Method tune\_wide.m  
Sample Name AB-KNB-03-168-R  
Comment

Acquisition Date 10/17/2017 12:42:35 PM

Operator RUCHI  
Instrument micrOTOF-Q II 10330

## Acquisition Parameter

|             |            |                       |           |                  |           |
|-------------|------------|-----------------------|-----------|------------------|-----------|
| Source Type | ESI        | Ion Polarity          | Positive  | Set Nebulizer    | 0.4 Bar   |
| Focus       | Not active | Set Capillary         | 4500 V    | Set Dry Heater   | 180 °C    |
| Scan Begin  | 50 m/z     | Set End Plate Offset  | -500 V    | Set Dry Gas      | 4.0 l/min |
| Scan End    | 3000 m/z   | Set Collision Cell RF | 600.0 Vpp | Set Divert Valve | Waste     |

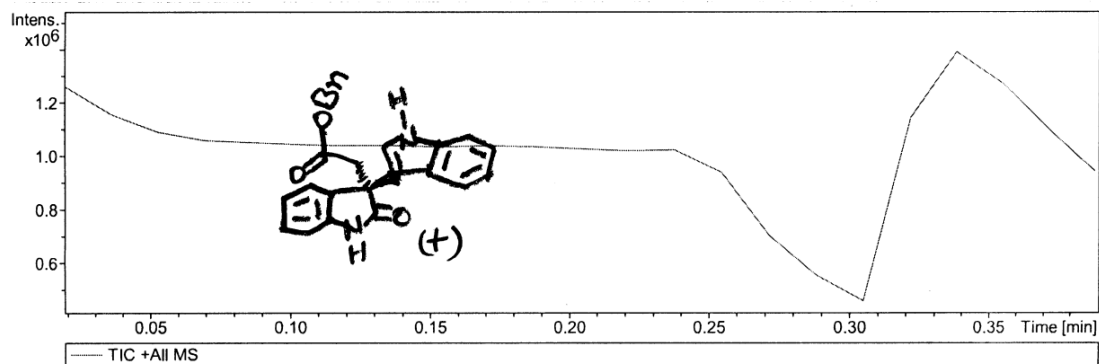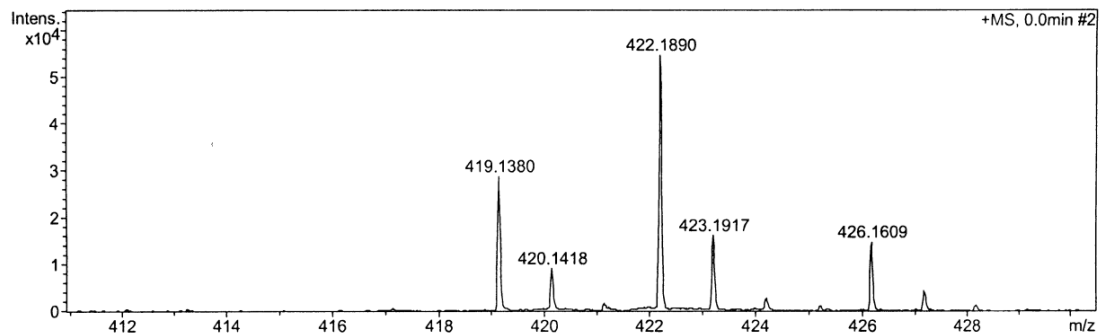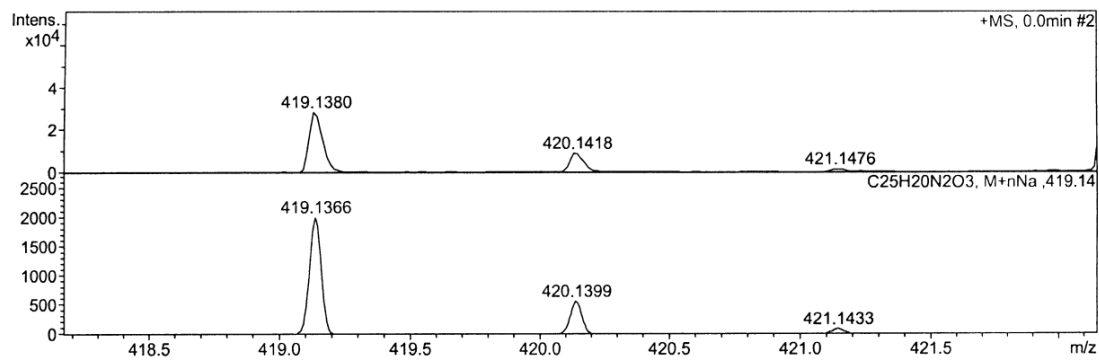

Scanned copy of mass spectrum of (R)-8

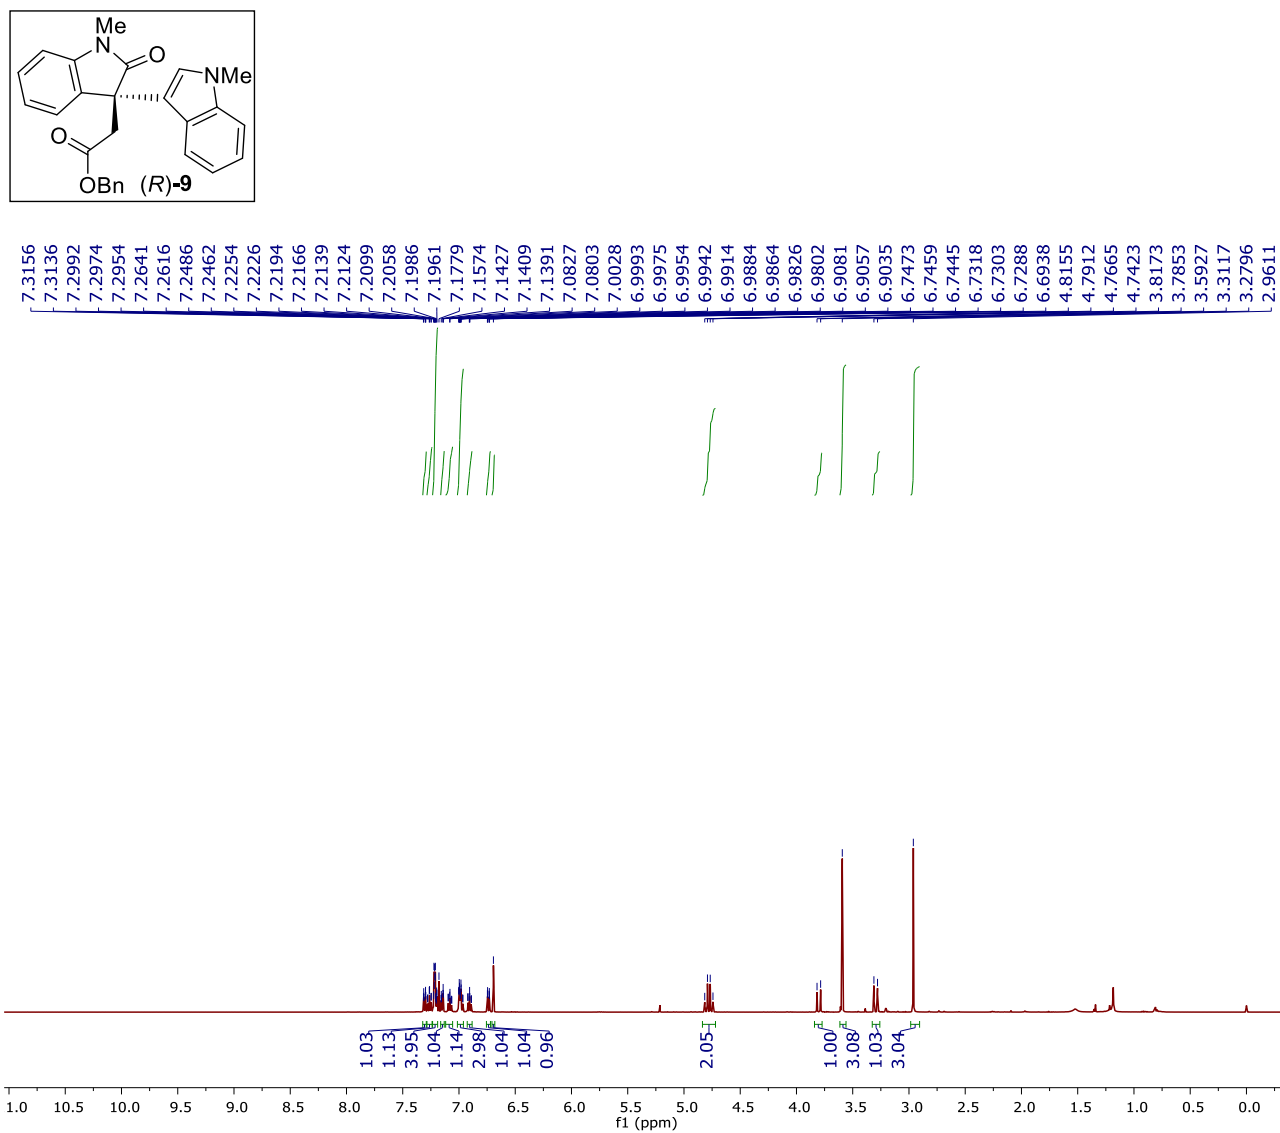 $^1\text{H}$  NMR (400 MHz,  $\text{CDCl}_3$ ) of compound (R)-9

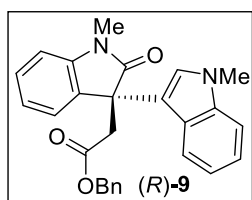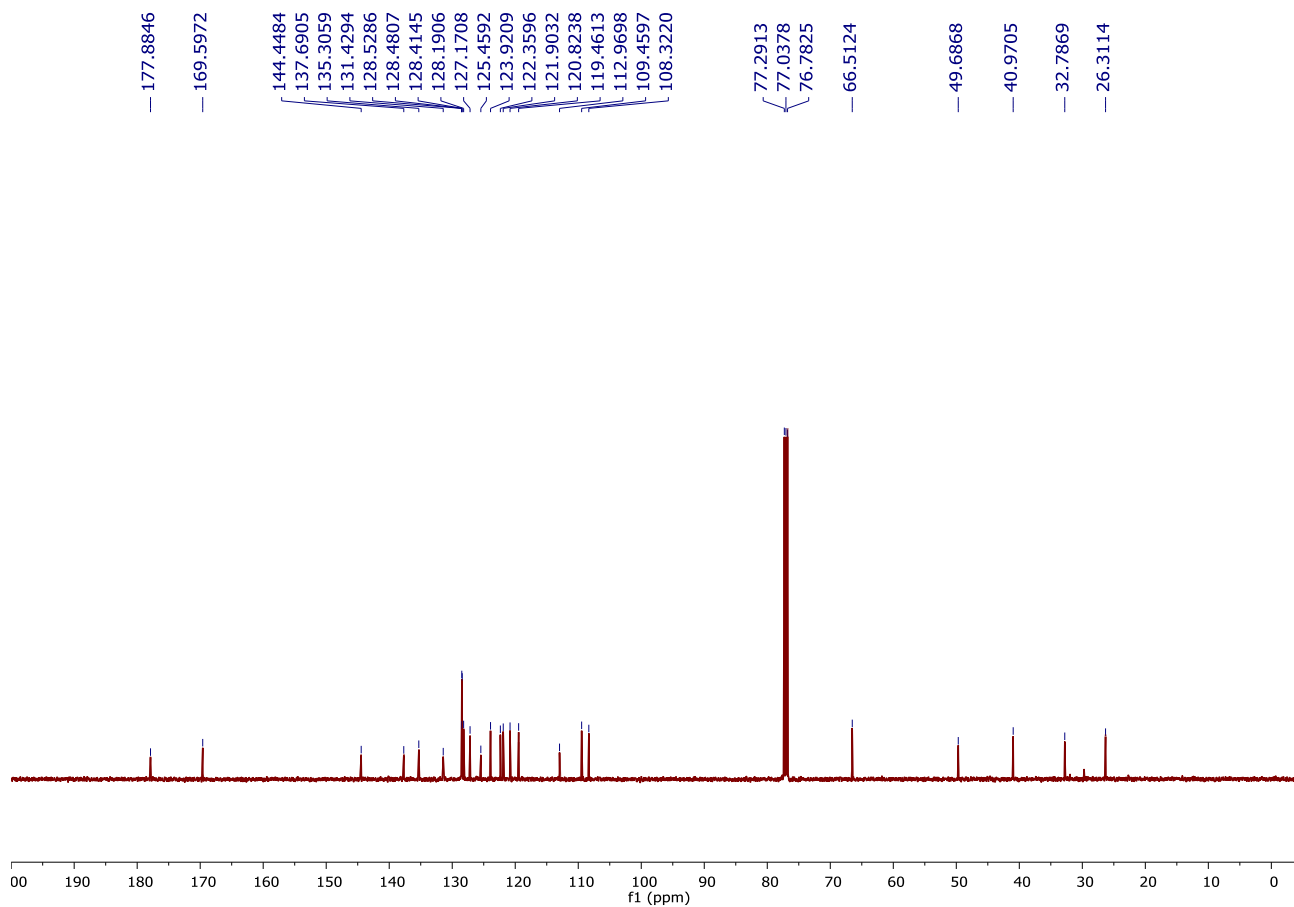

$^{13}\text{C}$  NMR (100 MHz,  $\text{CDCl}_3$ ) of compound (*R*)-**9**

## Display Report

## Analysis Info

Analysis Name D:\Data\user data\2016\July 2016\29-07-2016\Dr.A.Bisai-AB-KNB-03-170\_1-A,5\_01\_6993.d  
Method hrlcms-pos\_mid\_tune wide.m  
Sample Name Dr.A.Bisai-AB-KNB-03-170  
Comment

Acquisition Date 7/29/2016 1:31:50 PM

Operator DIMPLe

Instrument micrOTOF-Q II 10330

## Acquisition Parameter

|             |          |                       |           |                  |           |
|-------------|----------|-----------------------|-----------|------------------|-----------|
| Source Type | ESI      | Ion Polarity          | Positive  | Set Nebulizer    | 0.3 Bar   |
| Focus       | Active   | Set Capillary         | 4500 V    | Set Dry Heater   | 200 °C    |
| Scan Begin  | 50 m/z   | Set End Plate Offset  | -500 V    | Set Dry Gas      | 4.0 l/min |
| Scan End    | 3000 m/z | Set Collision Cell RF | 450.0 Vpp | Set Divert Valve | Waste     |

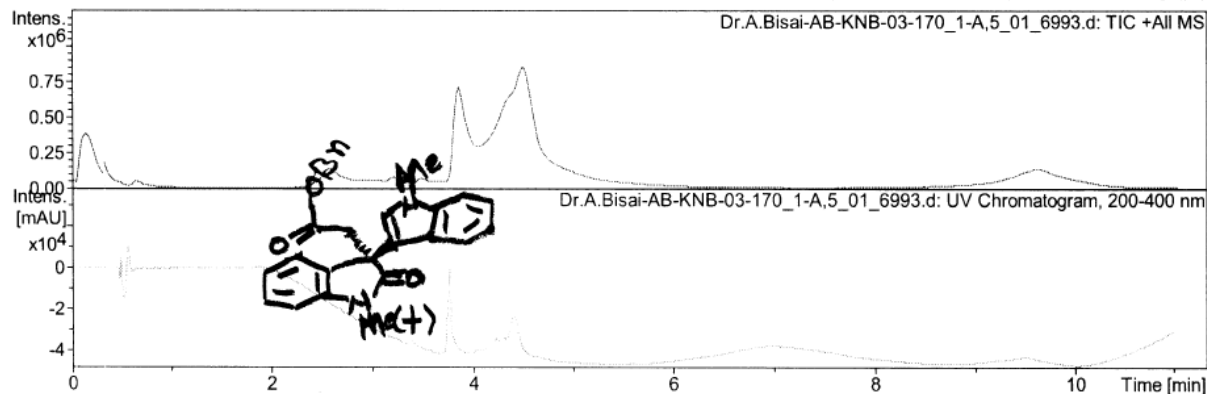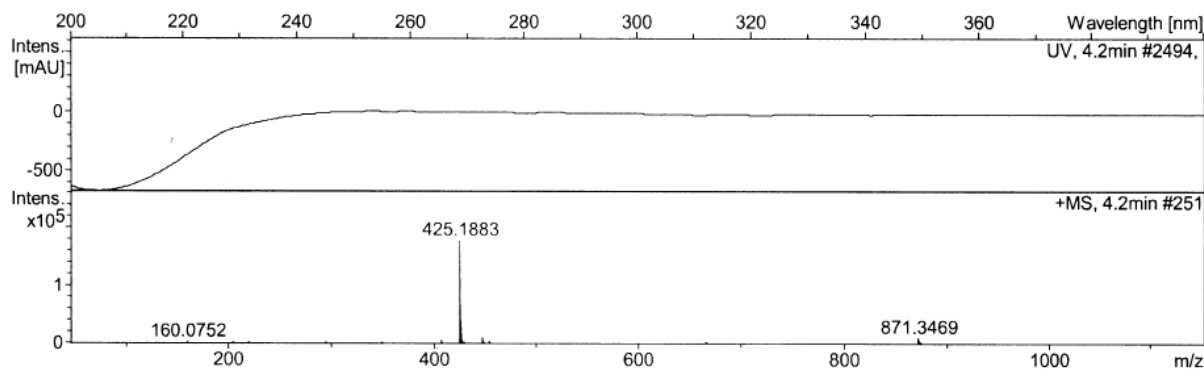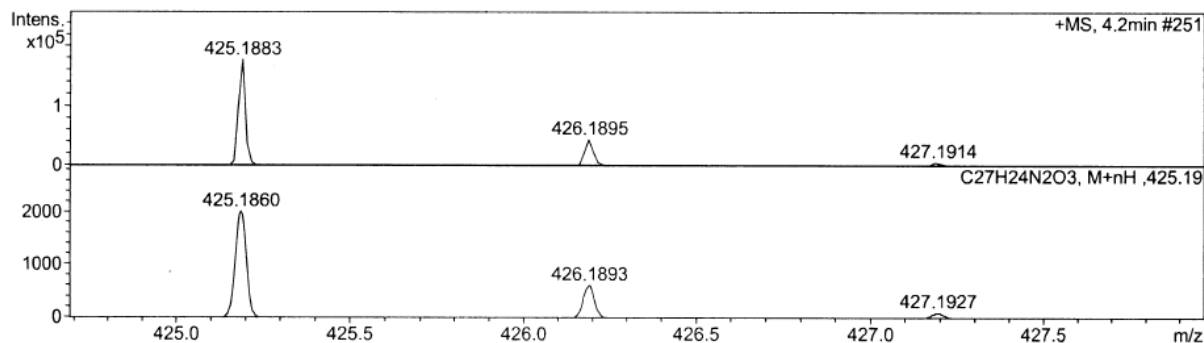

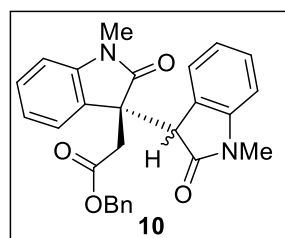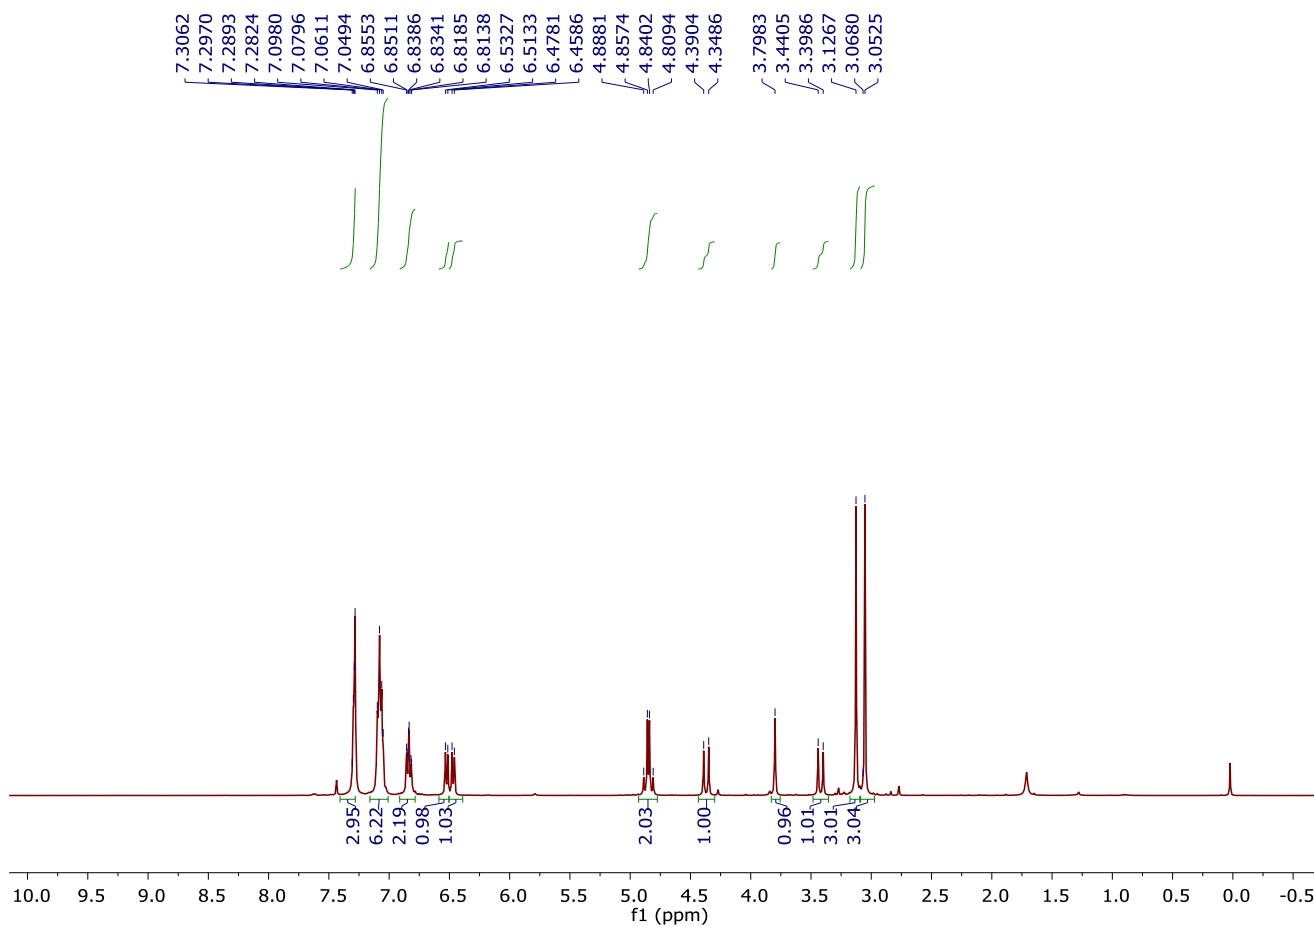

$^1\text{H}$  NMR (400 MHz,  $\text{CDCl}_3$ ) of compound **10**

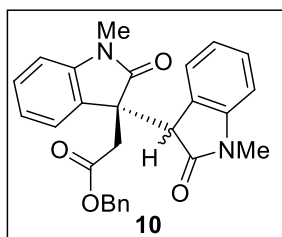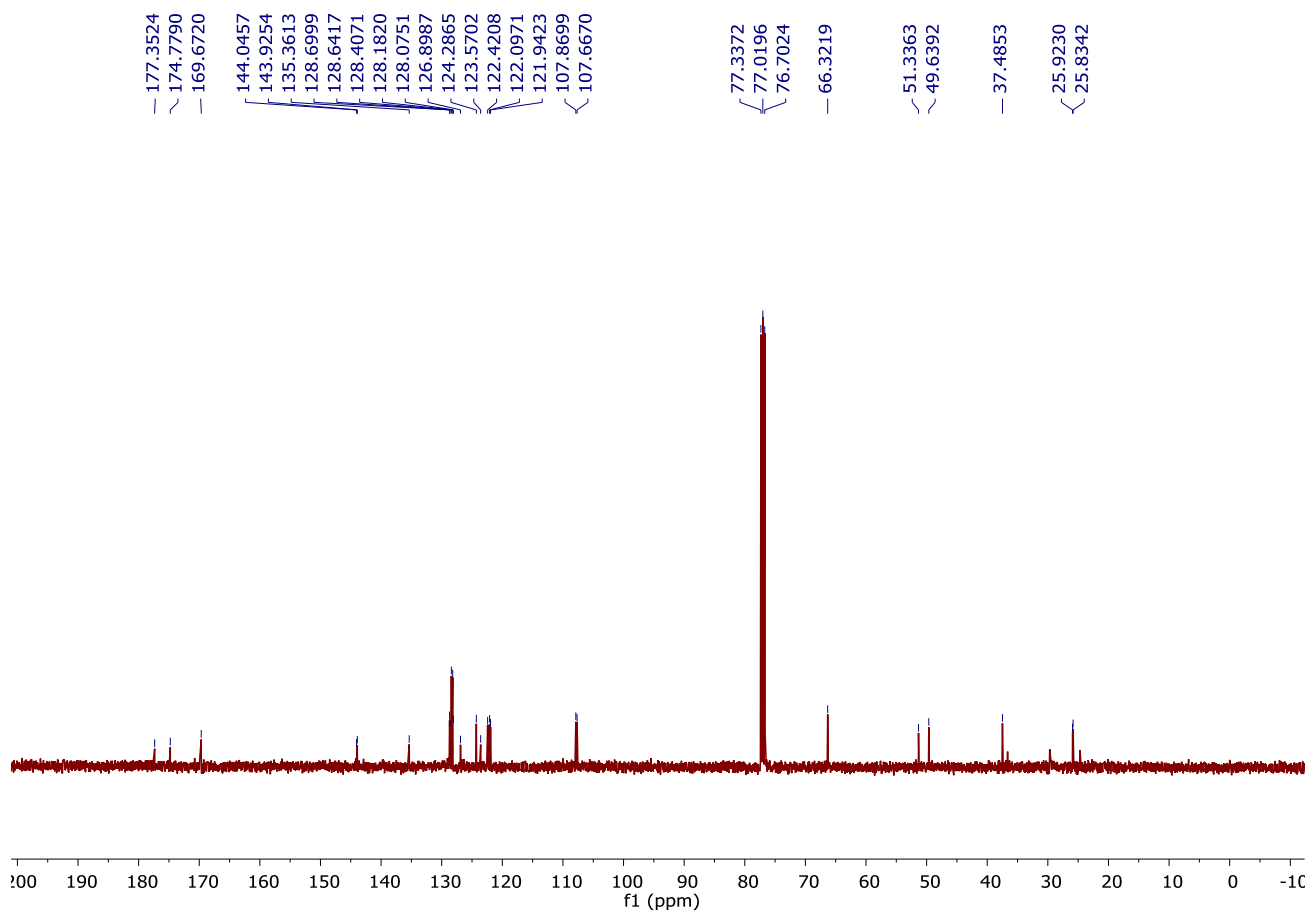

<sup>13</sup>C NMR (100 MHz, CDCl<sub>3</sub>) of compound **10**

## Display Report

## Analysis Info

Analysis Name D:\Data\user data\2017\JUNE 2017\19 june\Dr A Bisai-AB-KNB-03-174-CRUDE\_1-B,8\_01\_2168.d  
Method hrlcms\_pos\_mid\_tunemix.m  
Sample Name Dr A Bisai-AB-KNB-03-174-CRUDE  
Comment

Acquisition Date 6/19/2017 3:26:42 PM  
Operator RUCHI SHRIVASTAVA  
Instrument micrOTOF-Q II 10330

## Acquisition Parameter

|             |          |                       |           |                  |           |
|-------------|----------|-----------------------|-----------|------------------|-----------|
| Source Type | ESI      | Ion Polarity          | Positive  | Set Nebulizer    | 0.3 Bar   |
| Focus       | Active   | Set Capillary         | 4500 V    | Set Dry Heater   | 200 °C    |
| Scan Begin  | 50 m/z   | Set End Plate Offset  | -500 V    | Set Dry Gas      | 4.0 l/min |
| Scan End    | 3000 m/z | Set Collision Cell RF | 450.0 Vpp | Set Divert Valve | Waste     |

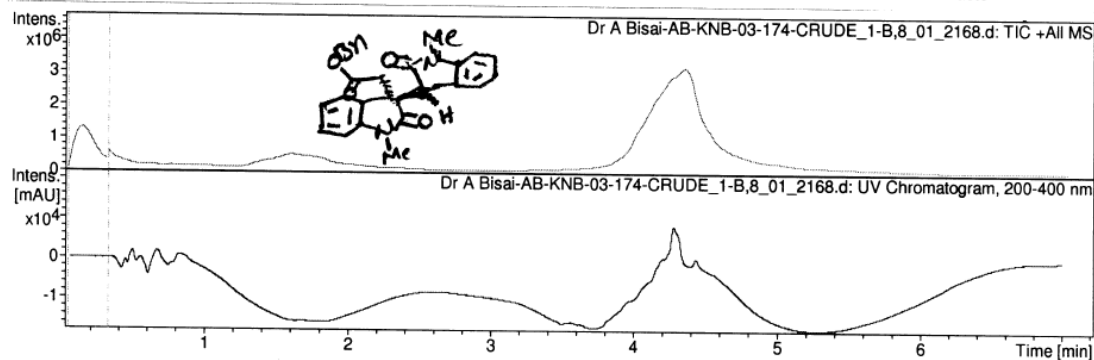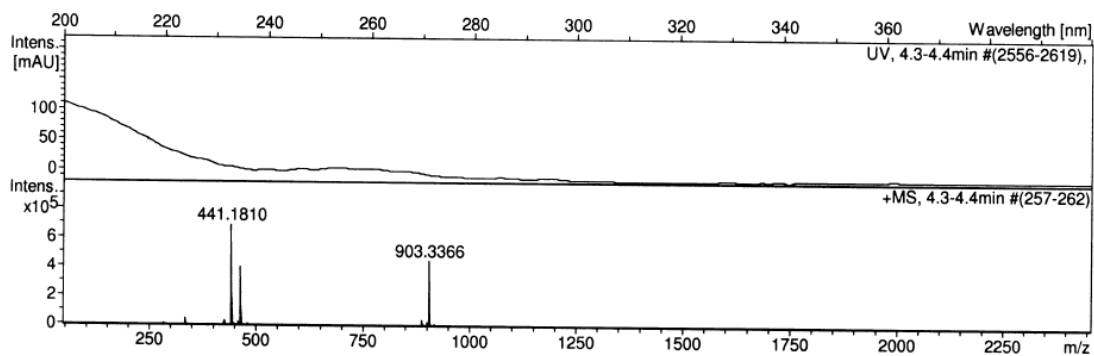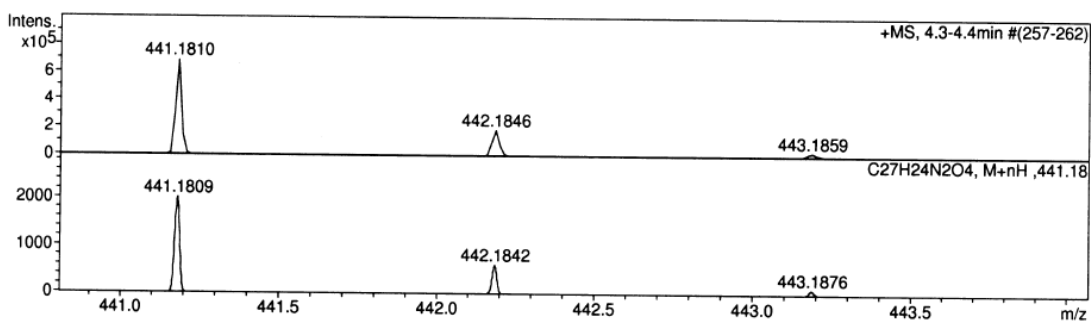



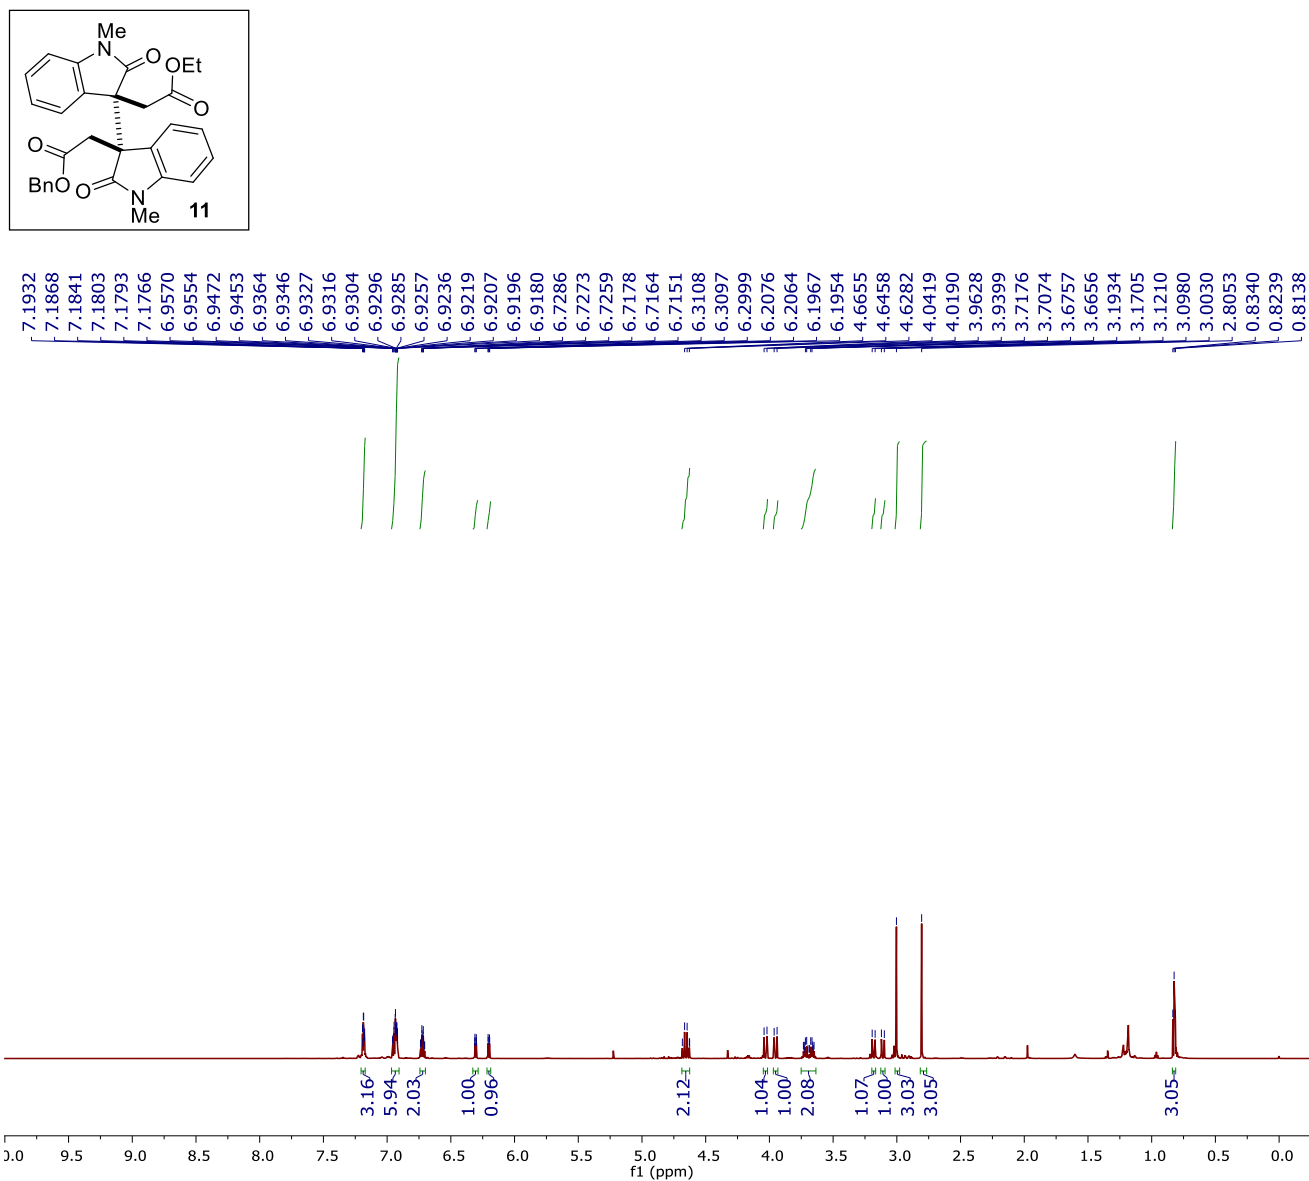 $^1\text{H}$  NMR (400 MHz,  $\text{CDCl}_3$ ) of compound **11**

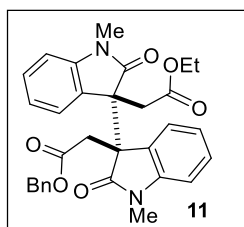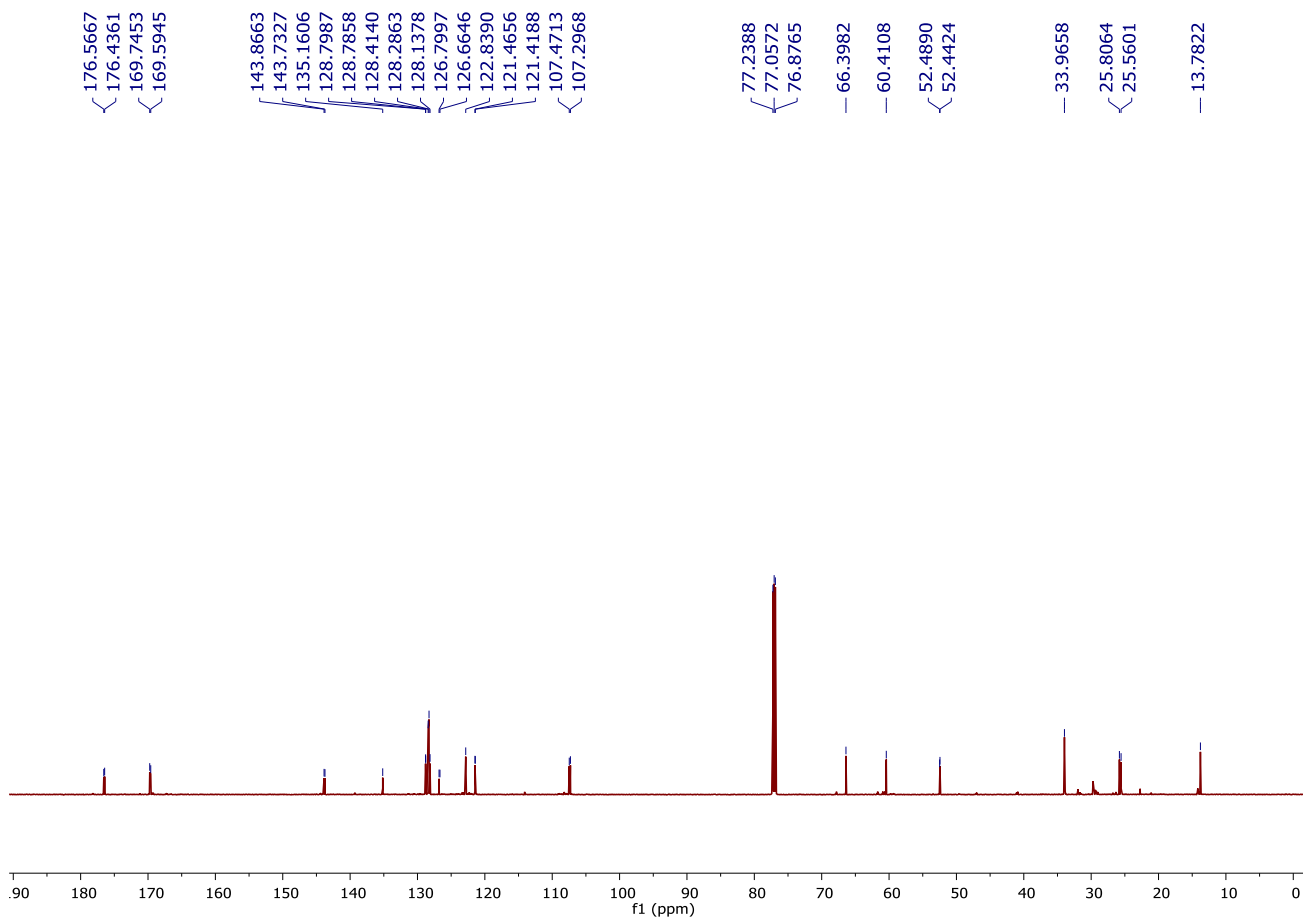

$^{13}\text{C}$  NMR (100 MHz,  $\text{CDCl}_3$ ) of compound **11**

## Display Report

## Analysis Info

Analysis Name D:\Data\user data\2017\MAY 2017\25 may\Dr A Bisai-KNB-03-255\_1-E,3\_01\_1706.d  
Method hrlcms\_pos\_mid\_tunemix.m  
Sample Name Dr A Bisai-KNB-03-255  
Comment

Acquisition Date 5/25/2017 10:53:18 AM

Operator RUCHI SHRIVASTAVA

Instrument micrOTOF-Q II 10330

## Acquisition Parameter

|             |          |                       |           |                  |           |
|-------------|----------|-----------------------|-----------|------------------|-----------|
| Source Type | ESI      | Ion Polarity          | Positive  | Set Nebulizer    | 0.3 Bar   |
| Focus       | Active   | Set Capillary         | 4500 V    | Set Dry Heater   | 200 °C    |
| Scan Begin  | 50 m/z   | Set End Plate Offset  | -500 V    | Set Dry Gas      | 4.0 l/min |
| Scan End    | 3000 m/z | Set Collision Cell RF | 450.0 Vpp | Set Divert Valve | Waste     |

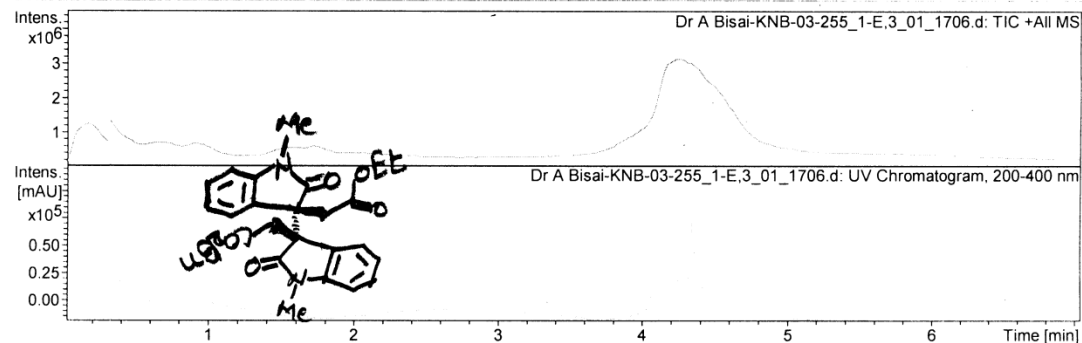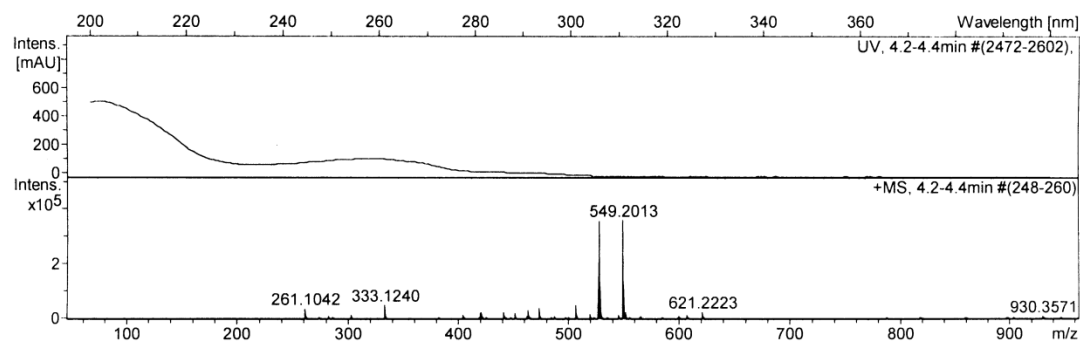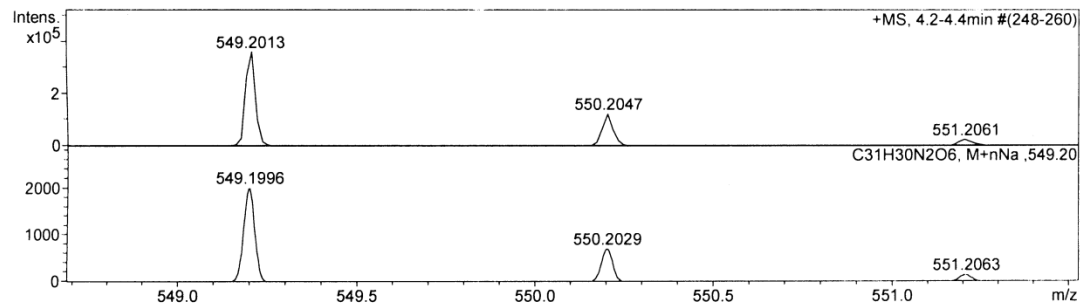

Scanned copy of mass spectrum of 11

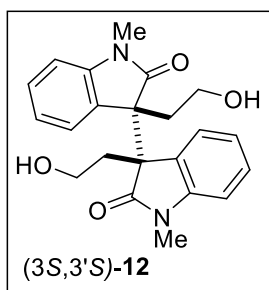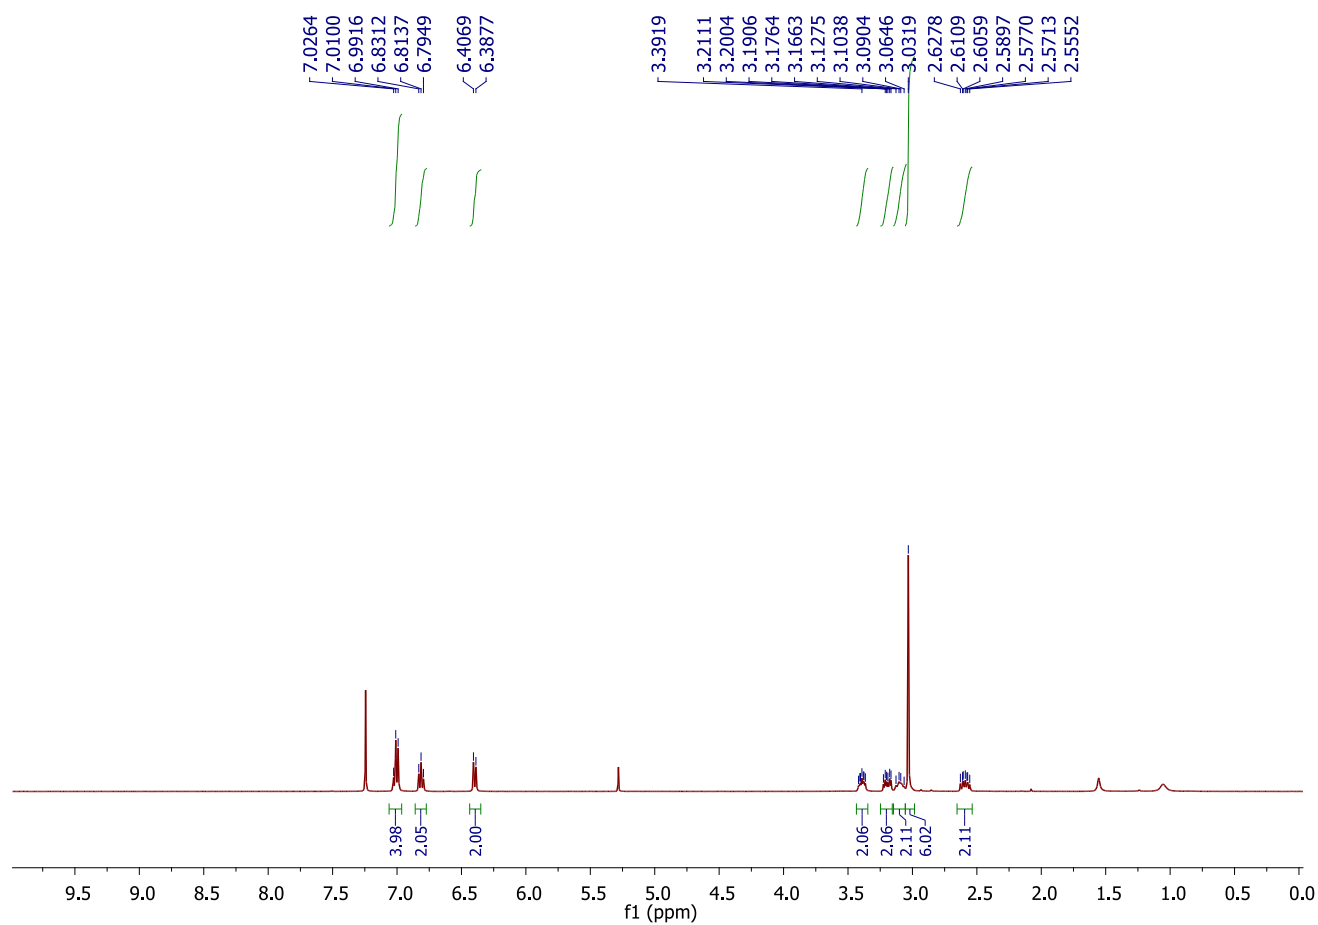

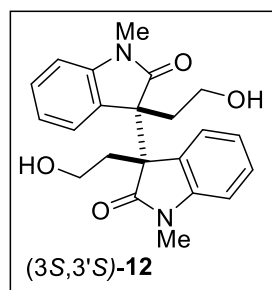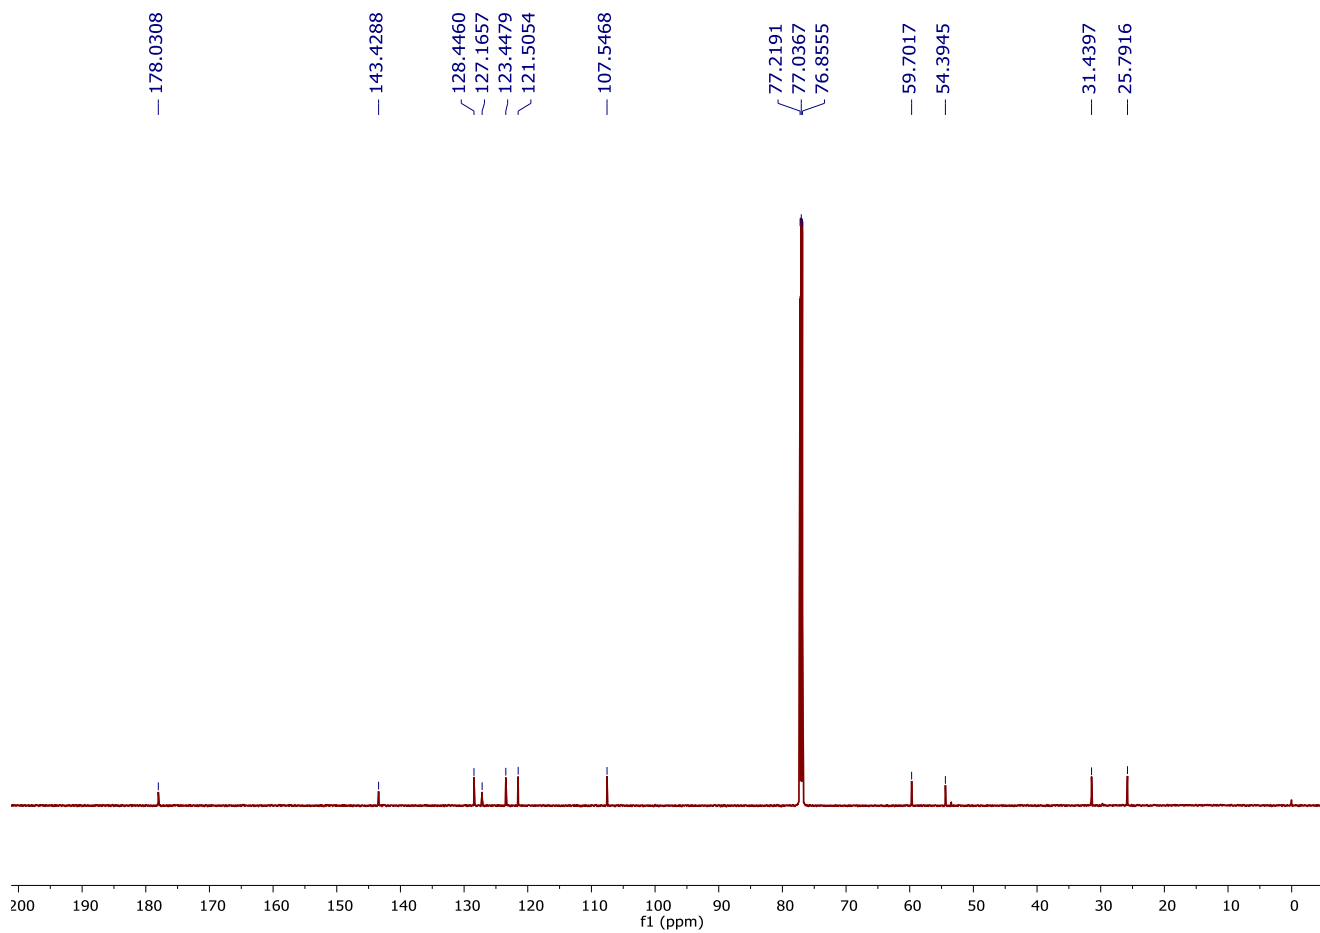

<sup>13</sup>C NMR (100 MHz, CDCl<sub>3</sub>) of compound (3*S*, 3'*S*)-**12**

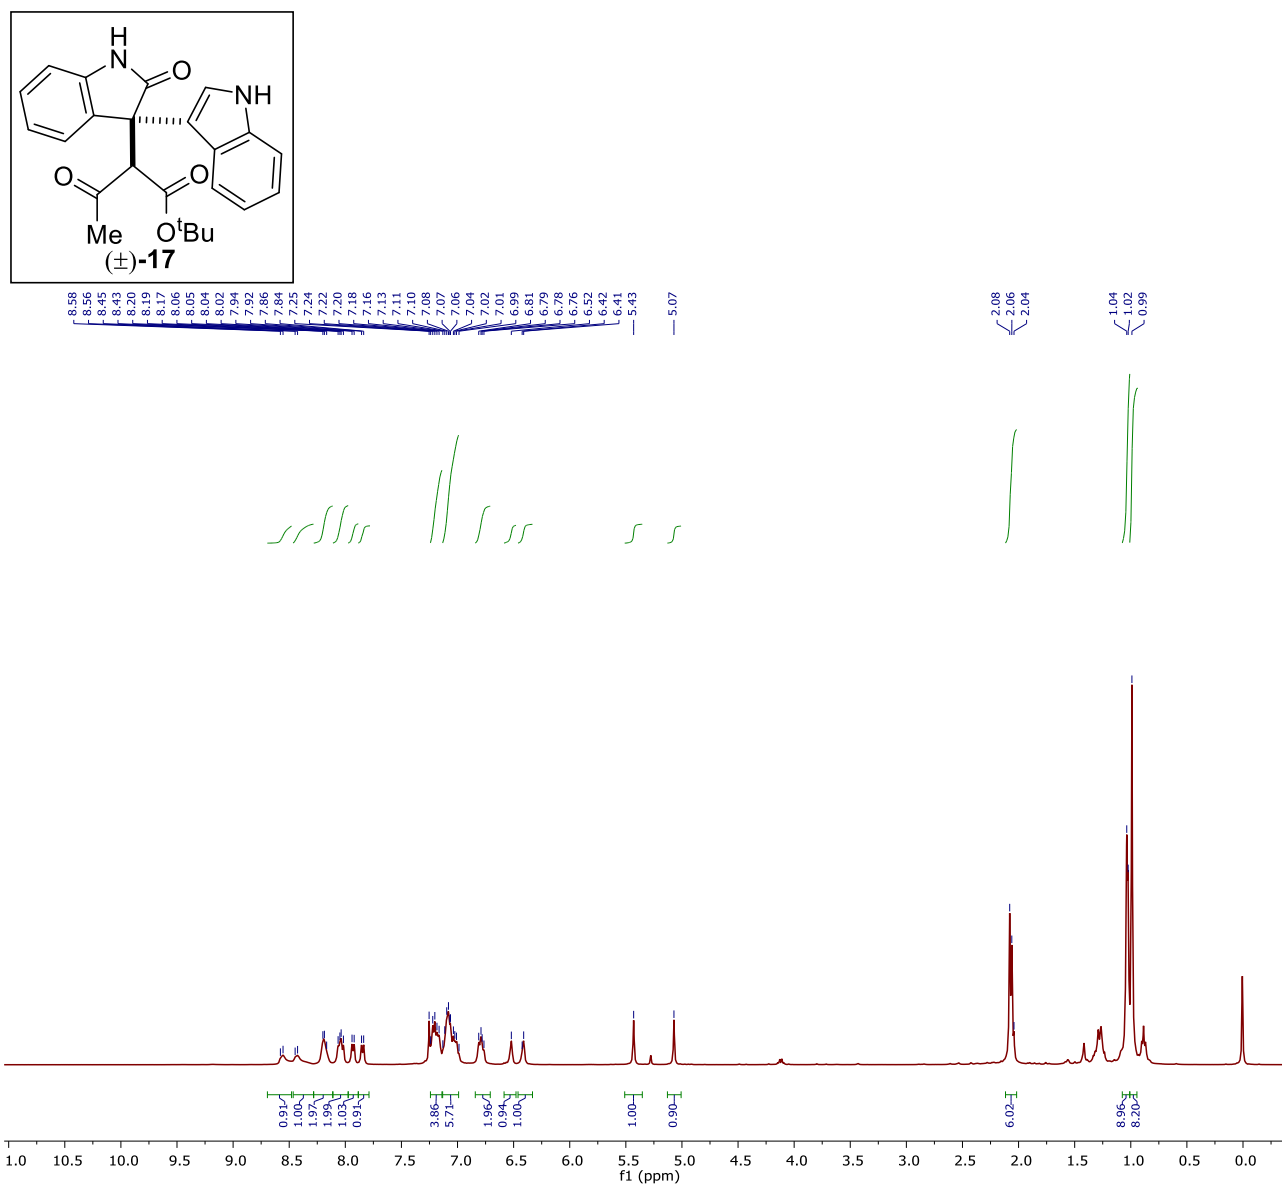

<sup>1</sup>H NMR (400 MHz, CDCl<sub>3</sub>) of compound (±)-17

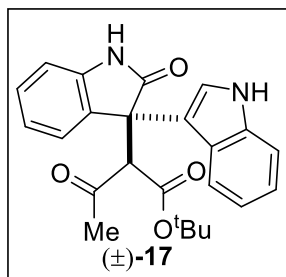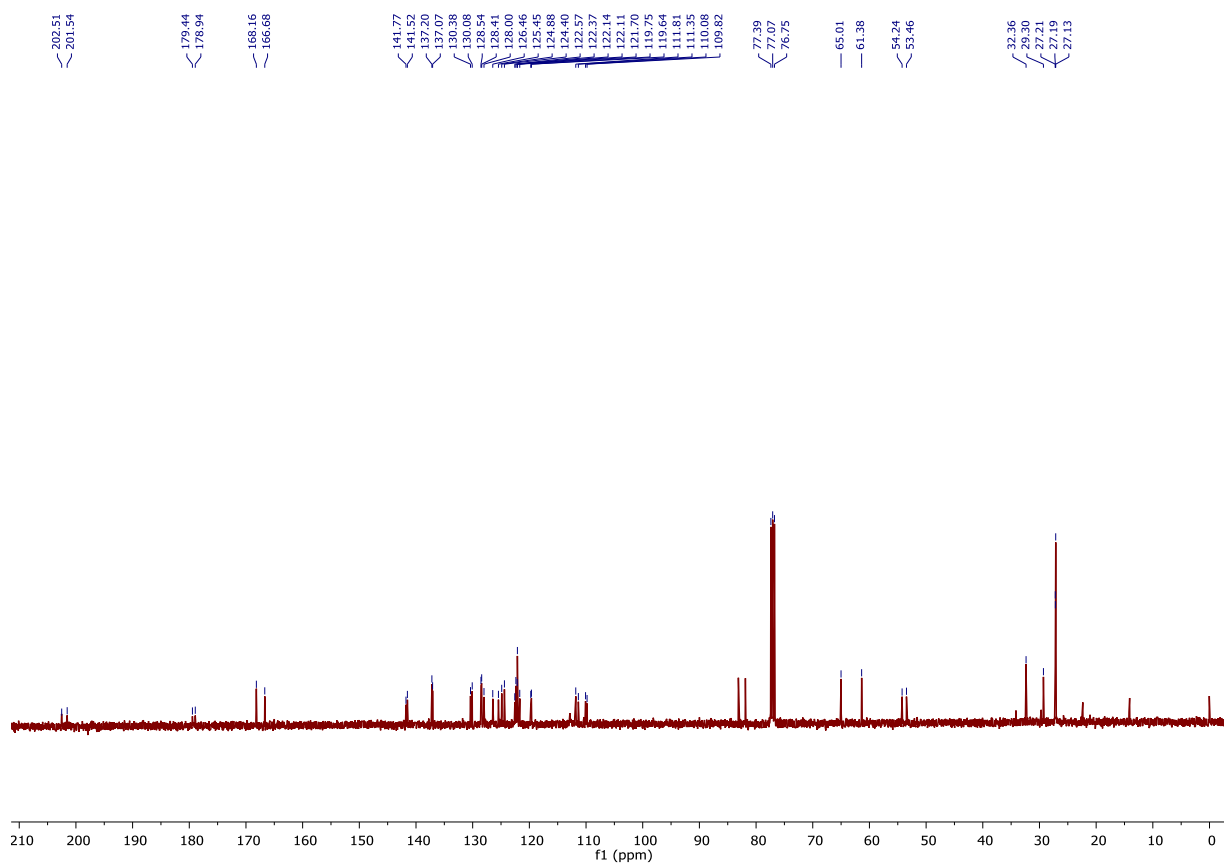

<sup>13</sup>C NMR (100 MHz, CDCl<sub>3</sub>) of compound (±)-17

## Display Report

## Analysis Info

|               |                                                                        |                  |                       |
|---------------|------------------------------------------------------------------------|------------------|-----------------------|
| Analysis Name | D:\Data\NEW USER DATA 2017\2018\15-march-2018\Dr. A Bisai-KNB-02-221.d | Acquisition Date | 3/15/2018 10:13:15 AM |
| Method        | tune mix_low.New.021117.m                                              | Operator         | RUCHI                 |
| Sample Name   | KNB-02-221                                                             | Instrument       | microTOF-Q II 10330   |
| Comment       |                                                                        |                  |                       |

## Acquisition Parameter

|             |            |                       |           |                  |           |
|-------------|------------|-----------------------|-----------|------------------|-----------|
| Source Type | ESI        | Ion Polarity          | Positive  | Set Nebulizer    | 0.4 Bar   |
| Focus       | Not active | Set Capillary         | 4600 V    | Set Dry Heater   | 180 °C    |
| Scan Begin  | 50 m/z     | Set End Plate Offset  | -500 V    | Set Dry Gas      | 4.0 l/min |
| Scan End    | 3000 m/z   | Set Collision Cell RF | 100.0 Vpp | Set Divert Valve | Waste     |

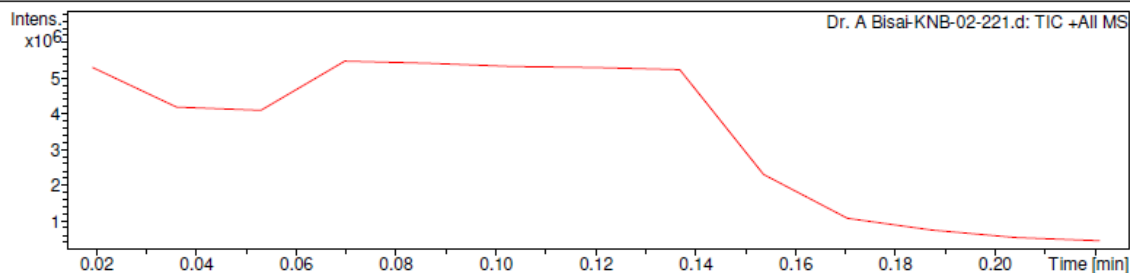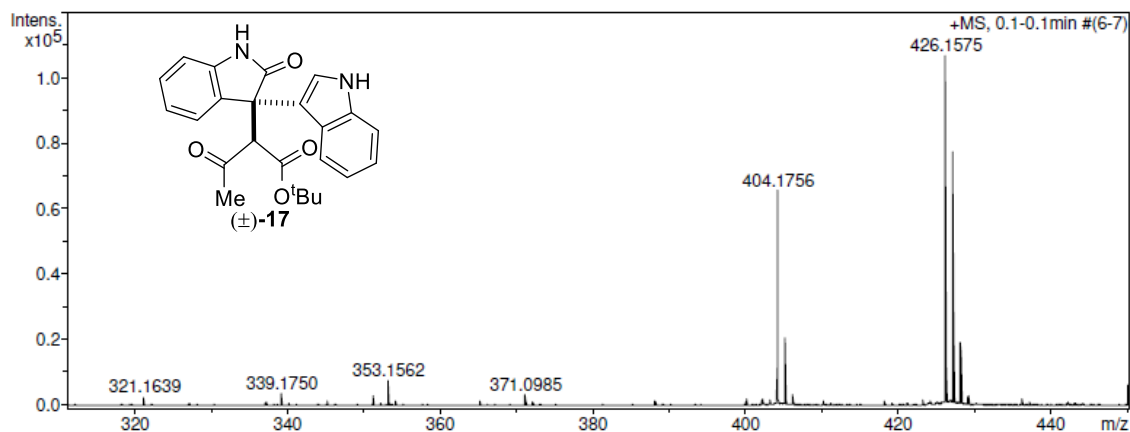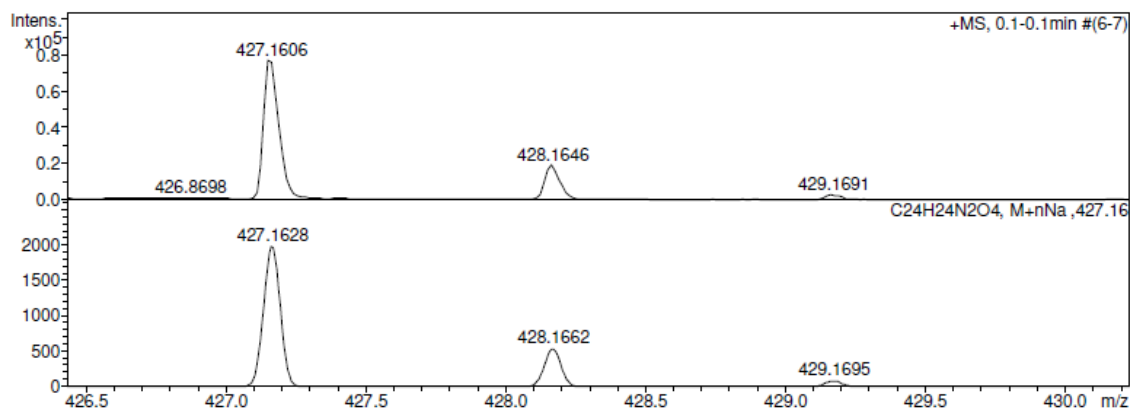

Bruker Compass DataAnalysis 4.0

printed: 3/15/2018 10:15:34 AM

Page 1 of 1

Mass spectrum of (±)-17



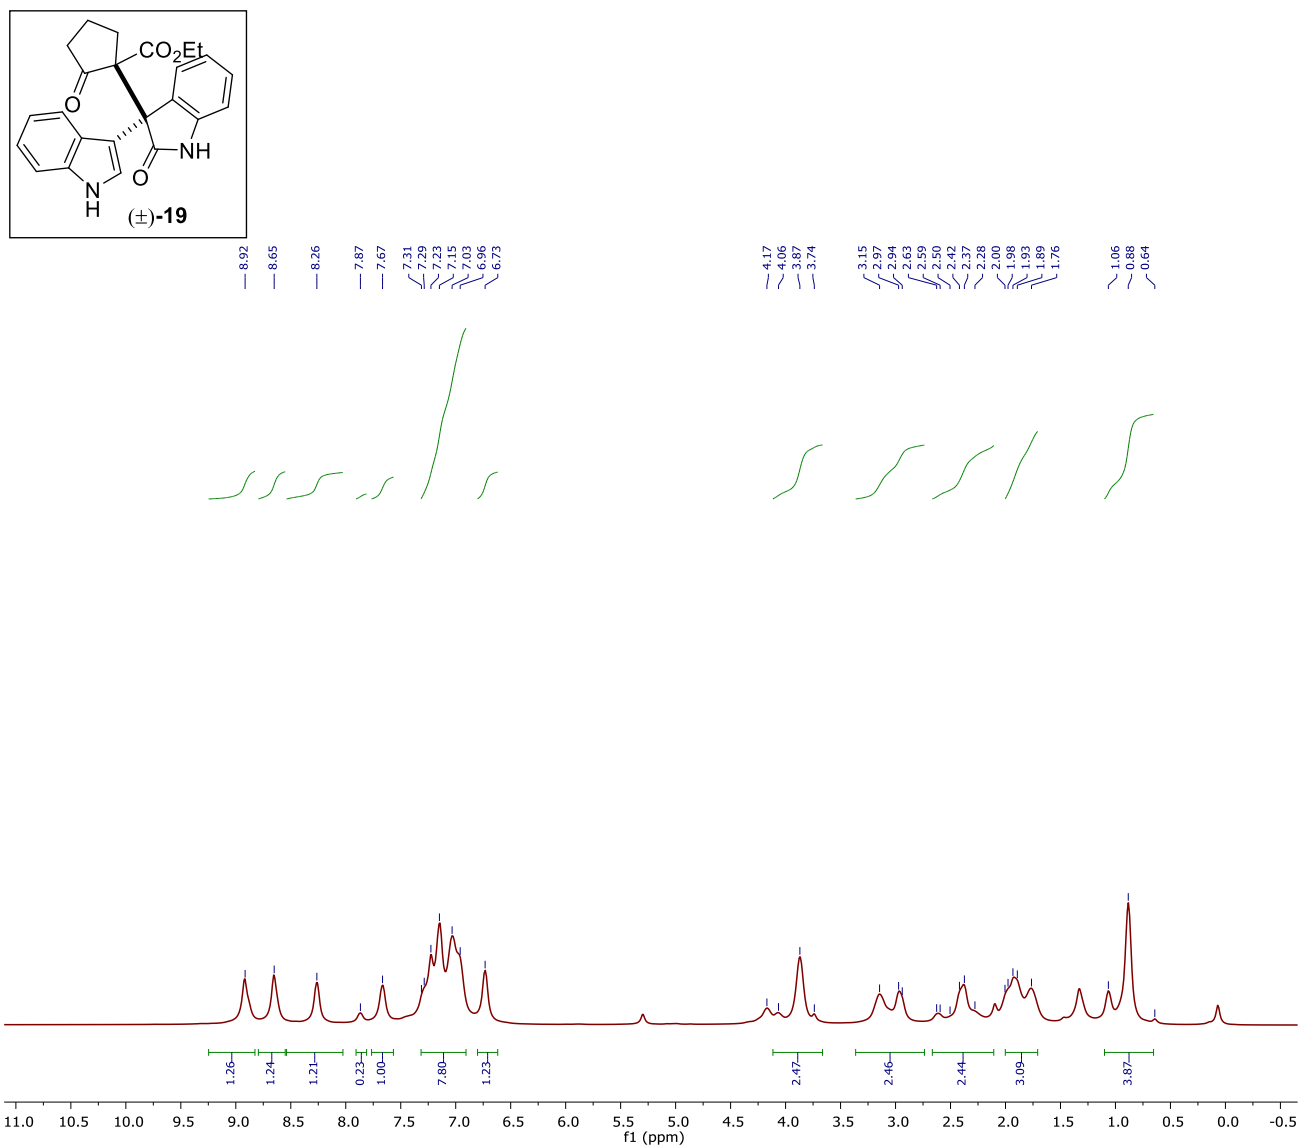 $^1\text{H}$  NMR (400 MHz,  $\text{CDCl}_3$ ) of compound **(±)-19**

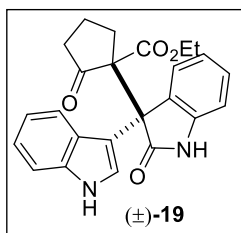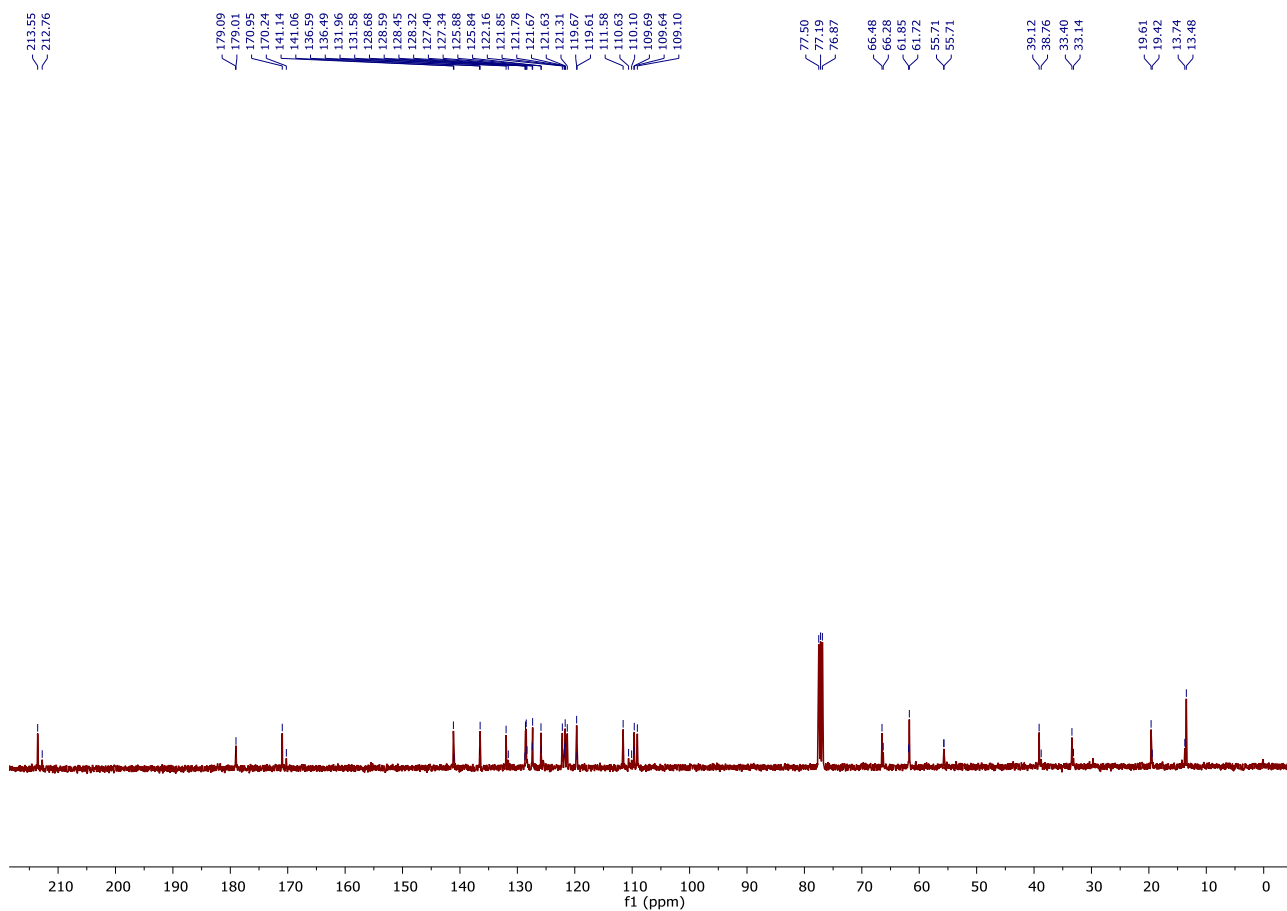

$^{13}\text{C}$  NMR (100 MHz,  $\text{CDCl}_3$ ) of compound (±)-**19**

## Display Report

## Analysis Info

Analysis Name D:\Data\NEW USER DATA 2017\2018\15-march-2018\Dr. A Bisai-KNB-02-217.d  
Method tune mix\_low.New.021117.m  
Sample Name KNB-02-217  
Comment

Acquisition Date 3/15/2018 10:54:55 AM

Operator RUCHI

Instrument micrOTOF-Q II 10330

## Acquisition Parameter

|             |            |                       |           |                  |           |
|-------------|------------|-----------------------|-----------|------------------|-----------|
| Source Type | ESI        | Ion Polarity          | Positive  | Set Nebulizer    | 0.4 Bar   |
| Focus       | Not active | Set Capillary         | 4600 V    | Set Dry Heater   | 180 °C    |
| Scan Begin  | 50 m/z     | Set End Plate Offset  | -500 V    | Set Dry Gas      | 4.0 l/min |
| Scan End    | 3000 m/z   | Set Collision Cell RF | 100.0 Vpp | Set Divert Valve | Waste     |

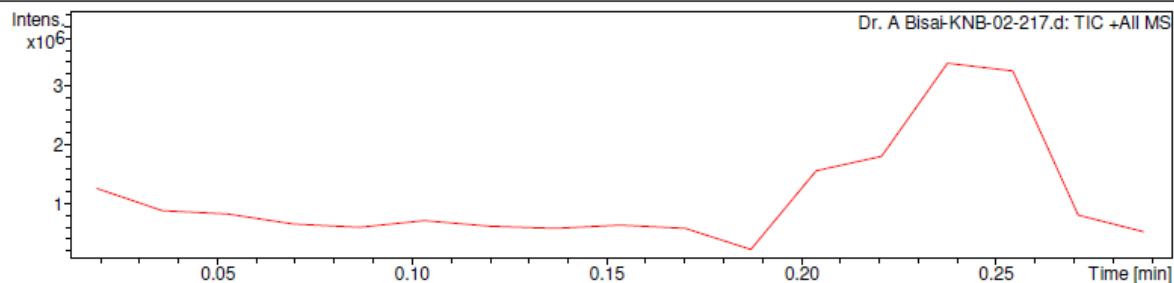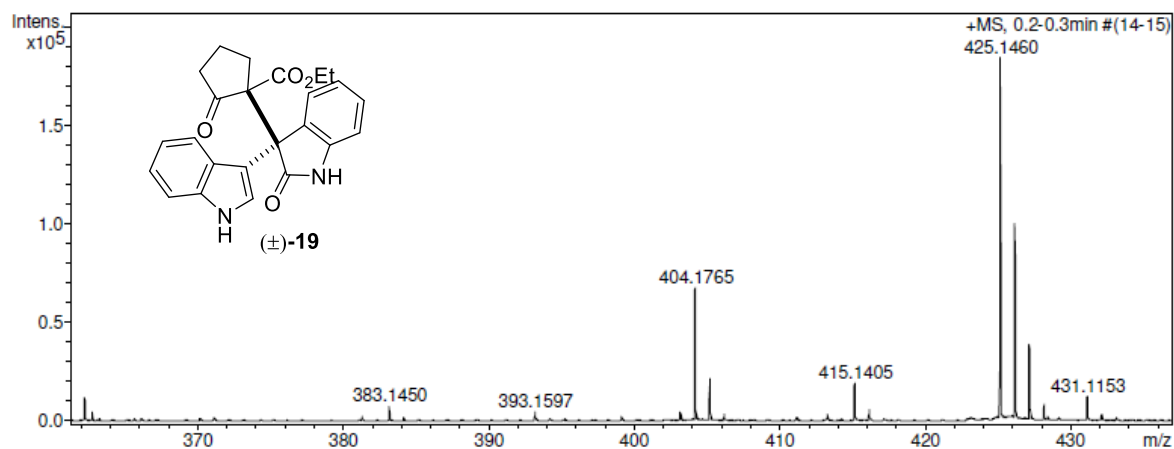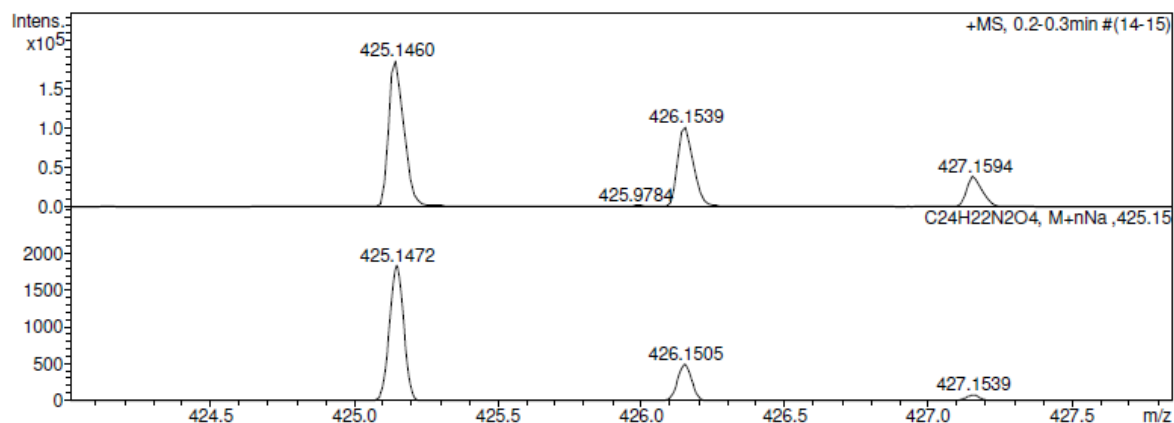

Mass spectrum of (±)-19

**Determination of diastereomeric ratio of compound **10** from  $^1\text{H}$  NMR of crude reaction**

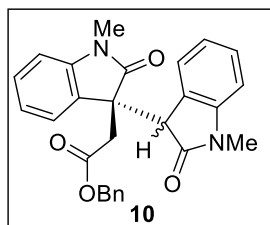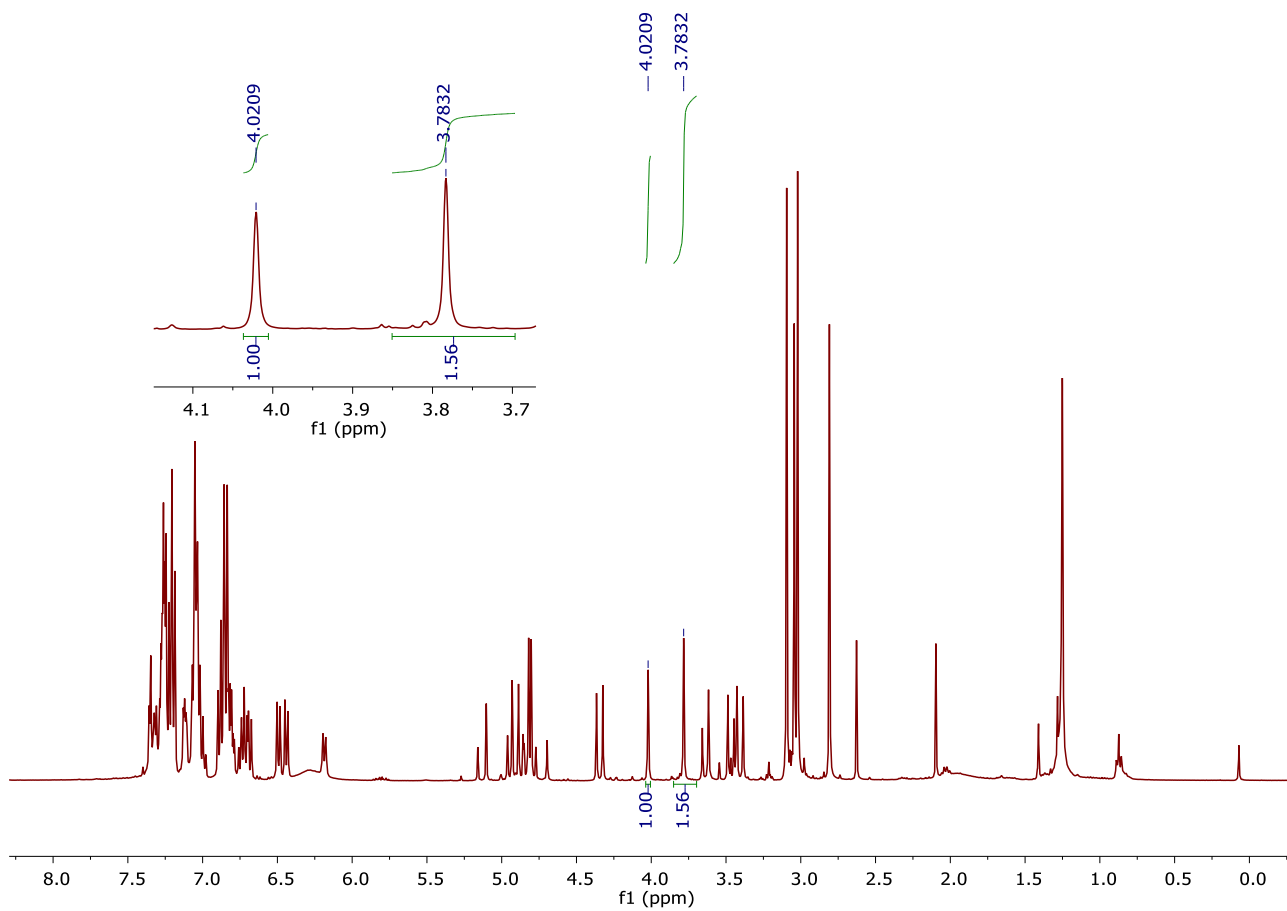

$^1\text{H}$  NMR (400 MHz,  $\text{CDCl}_3$ ) of crude compound **10**

**Determination of diastereomeric ratio of compound ( $\pm$ )-17 from  $^1\text{H}$  NMR of crude reaction**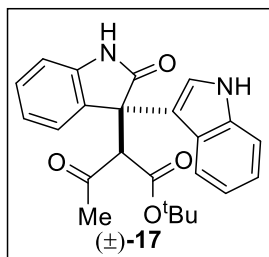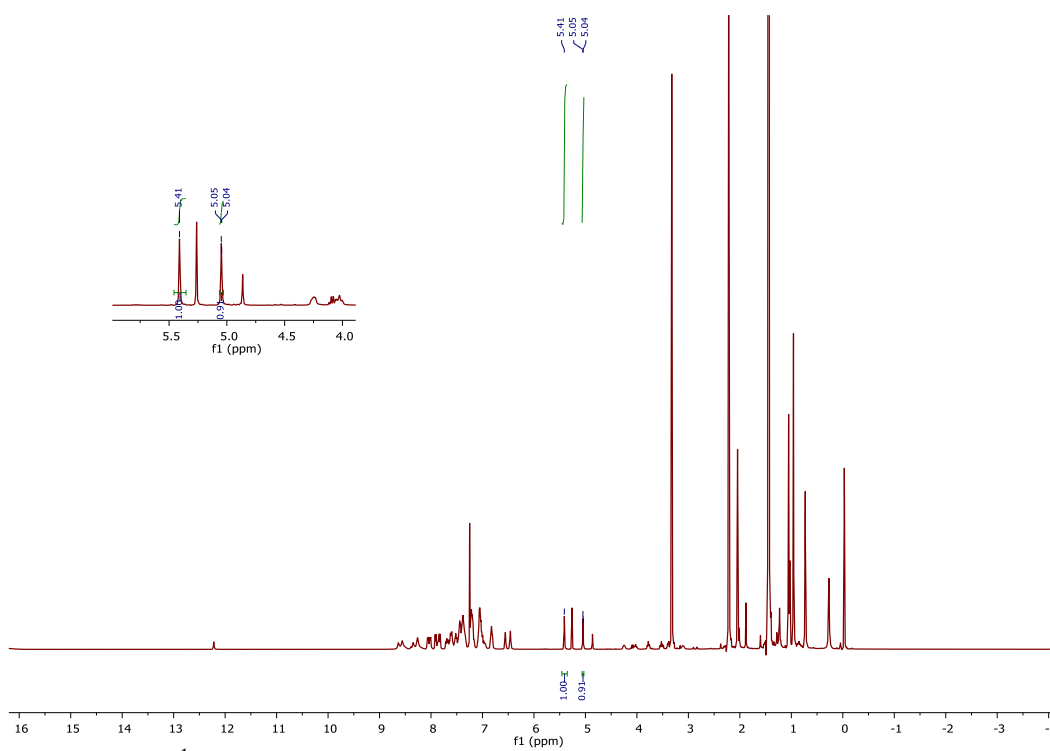

$^1\text{H}$  NMR (400 MHz,  $\text{CDCl}_3$ ) of crude compound ( $\pm$ )-17

**Determination of diastereomeric ratio of compound **19** from  $^1\text{H}$  NMR of crude reaction**

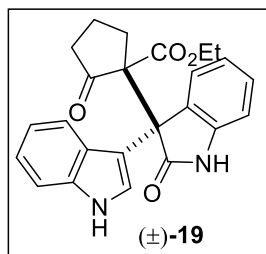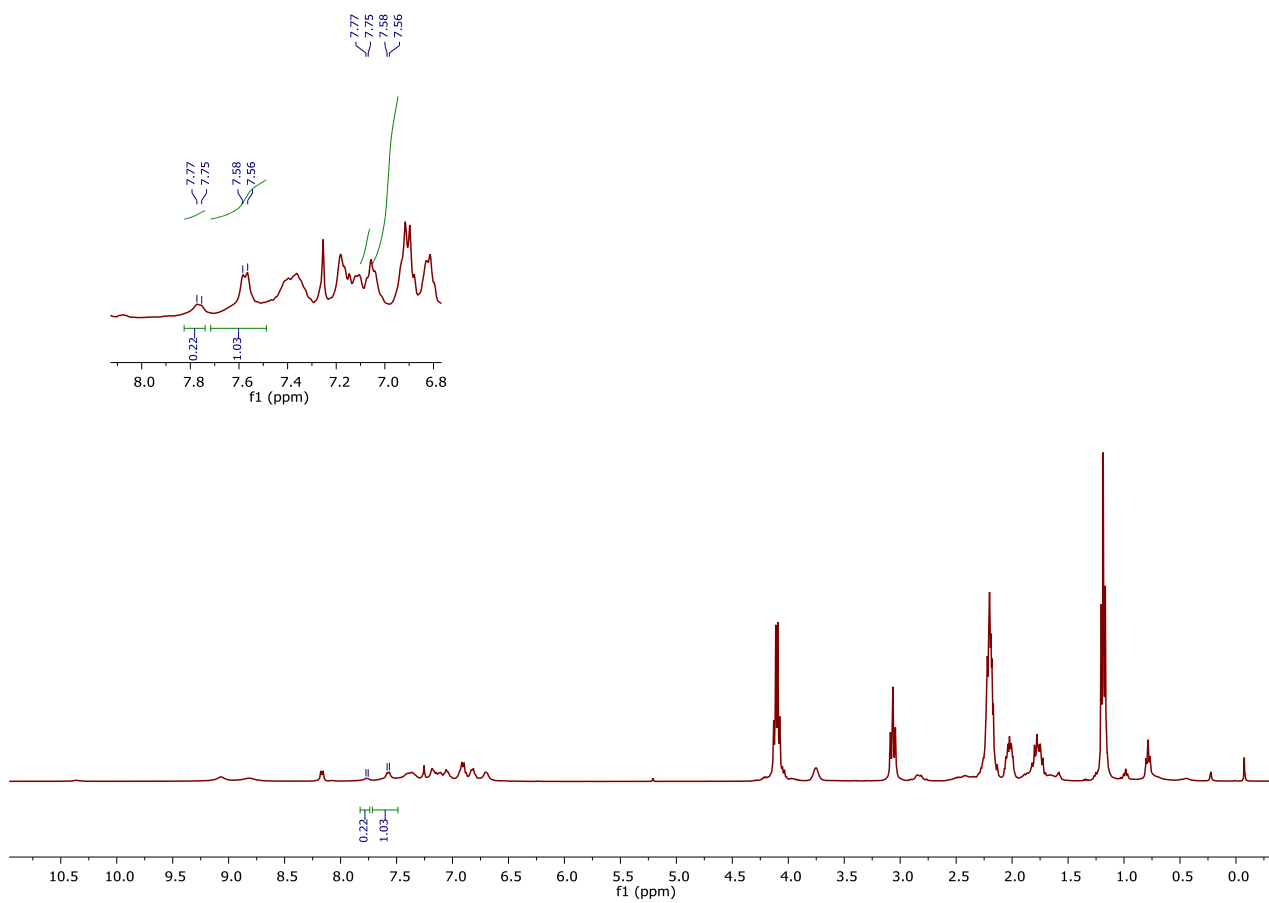

$^1\text{H}$  NMR (400 MHz,  $\text{CDCl}_3$ ) of crude compound **(±)-19**

## HPLC Traces

## HPLC data of compound-(±)-4a

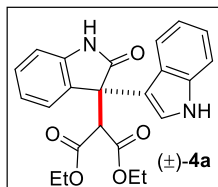

Data File C:\CHEM32\1\DATA\NARESH\2018-02-1317-34-13AB-KNB-05-048-ID3-50-1-254-50MRAC.D  
 Sample Name: AB-KNB-05-048-ID3-50-1-254-50MRAC

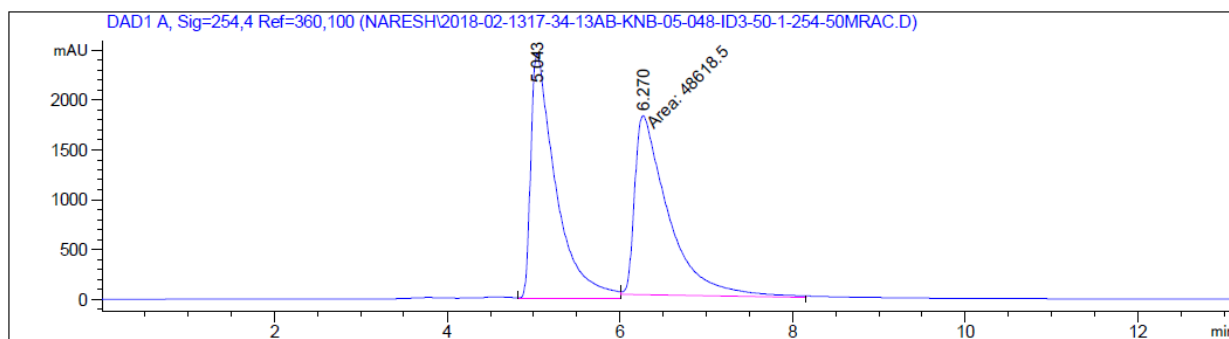

Signal 1: DAD1 A, Sig=254,4 Ref=360,100

| Peak # | RetTime [min] | Type | Width [min] | Area [mAU*s] | Height [mAU] | Area %  |
|--------|---------------|------|-------------|--------------|--------------|---------|
| 1      | 5.043         | VV   | 0.2780      | 4.92836e4    | 2457.59082   | 50.3397 |
| 2      | 6.270         | MM   | 0.4505      | 4.86185e4    | 1798.77979   | 49.6603 |

Totals : 9.79021e4 4256.37061

\*\*\* End of Report \*\*\*

## HPLC data of compound (R)-4a

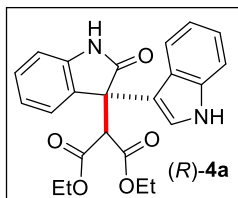

Data File C:\CHEM32\...A\NARESH\2018-03-0615-14-36AB-KNB-05-048-ID3-50-1-254-50M-CHIRAL2.D  
 Sample Name: AB-KNB-05-048-ID3-50-1-254-50M-CHIRAL2

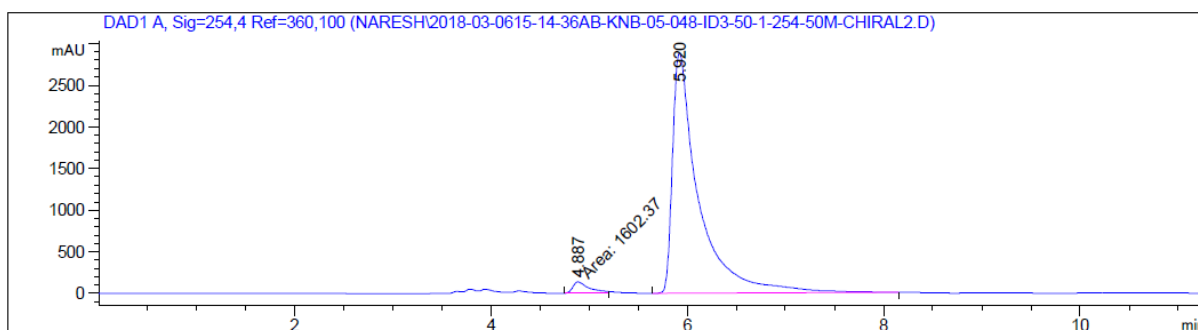

Signal 1: DAD1 A, Sig=254,4 Ref=360,100

| Peak # | RetTime [min] | Type | Width [min] | Area [mAU*s] | Height [mAU] | Area %  |
|--------|---------------|------|-------------|--------------|--------------|---------|
| 1      | 4.887         | MM   | 0.1947      | 1602.37219   | 137.17230    | 2.9103  |
| 2      | 5.920         | BB   | 0.2606      | 5.34571e4    | 2878.73560   | 97.0897 |

Totals : 5.50595e4 3015.90790

\*\*\* End of Report \*\*\*



## HPLC data of compound (R)-4a from 5k

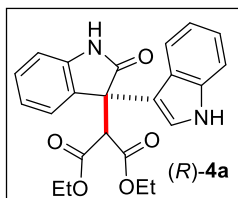

Data File C:\CHEM32\...A\NARESH\2018-03-0616-21-47AB-KNB-05-048-ID3-50-1-254-50M-CHIRAL6.D  
 Sample Name: AB-KNB-05-048-ID3-50-1-254-50M-CHIRAL6

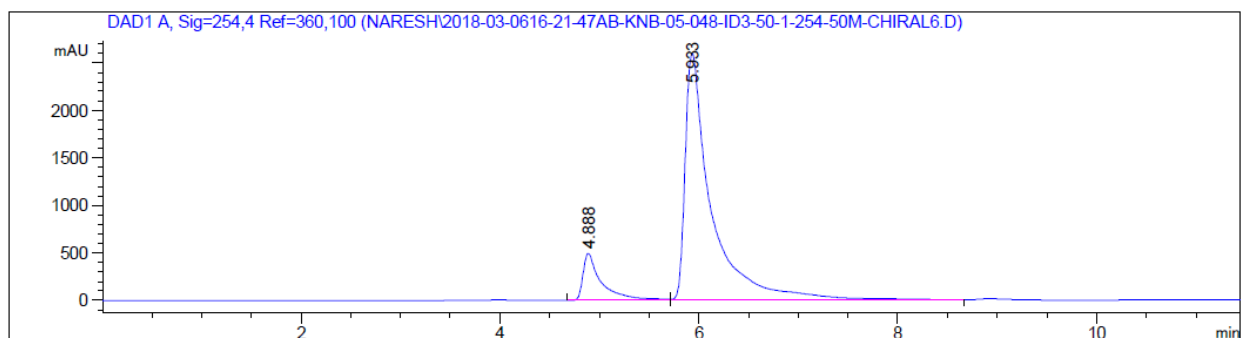

Signal 1: DAD1 A, Sig=254,4 Ref=360,100

| Peak # | RetTime [min] | Type | Width [min] | Area [mAU*s] | Height [mAU] | Area %  |
|--------|---------------|------|-------------|--------------|--------------|---------|
| 1      | 4.888         | BV   | 0.1812      | 6495.49609   | 494.67331    | 11.7701 |
| 2      | 5.933         | VV   | 0.2605      | 4.86909e4    | 2599.23633   | 88.2299 |

Totals : 5.51864e4 3093.90964

\*\*\* End of Report \*\*\*

**HPLC data of compound ( $\pm$ )-4b**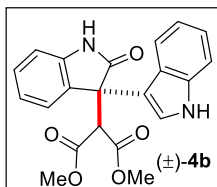

Data File C:\CHEM32\1\DATA\NARESH\2018-03-0723-22-17AB-KNB-03-006-OZ3-30-1-254-50M.D  
 Sample Name: AB-KNB-03-006-OZ3-30-1-254-50M

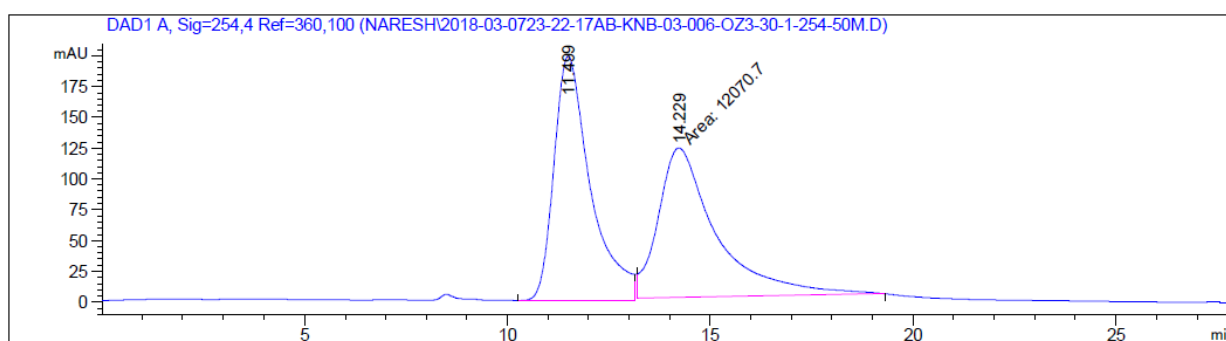

Signal 1: DAD1 A, Sig=254,4 Ref=360,100

| Peak # | RetTime [min] | Type | Width [min] | Area [mAU*s] | Height [mAU] | Area %  |
|--------|---------------|------|-------------|--------------|--------------|---------|
| 1      | 11.499        | BV   | 0.9274      | 1.24358e4    | 198.35529    | 50.7449 |
| 2      | 14.229        | MM   | 1.6576      | 1.20707e4    | 121.37089    | 49.2551 |

Totals : 2.45066e4 319.72617

\*\*\* End of Report \*\*\*

## HPLC data of compound (R)-4b

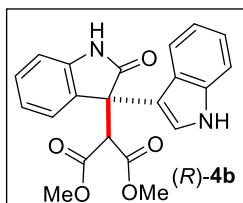

Data File C:\CHEM32\1\DATA\NARESH\2018-03-0718-32-53AB-KNB-05-055-OZ3-30-1-254-50M.D  
 Sample Name: AB-KNB-05-055-OZ3-30-1-254-50M

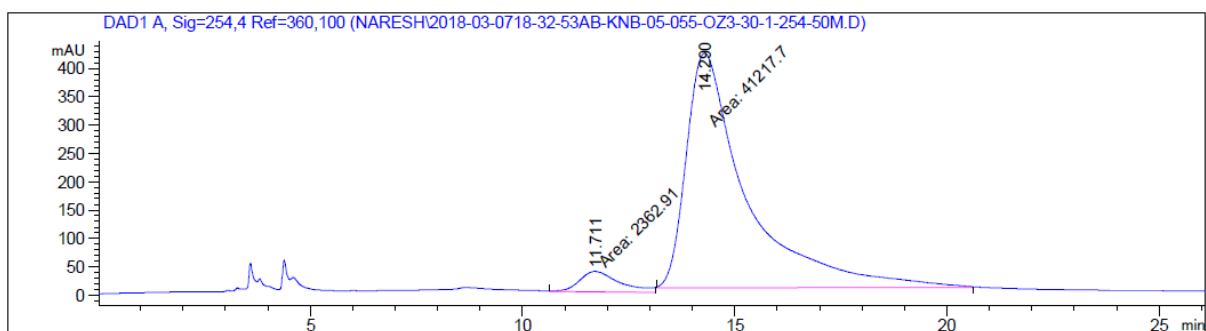

Signal 1: DAD1 A, Sig=254,4 Ref=360,100

| Peak # | RetTime [min] | Type | Width [min] | Area [mAU*s] | Height [mAU] | Area %  |
|--------|---------------|------|-------------|--------------|--------------|---------|
| 1      | 11.711        | MM   | 1.0946      | 2362.91309   | 35.97766     | 5.4219  |
| 2      | 14.290        | MM   | 1.6580      | 4.12177e4    | 414.34091    | 94.5781 |

Totals : 4.35806e4 450.31857

\*\*\* End of Report \*\*\*

**HPLC data of compound (±)-4c**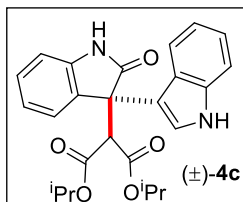

Data File C:\CHEM32\...TA\NARESH\2018-01-2614-07-11AB-KNB-02-E-001-IB-30-1-254-50 M RACE.D  
 Sample Name: AB-KNB-02-E-001-IB-30-1-254-50 M RACE

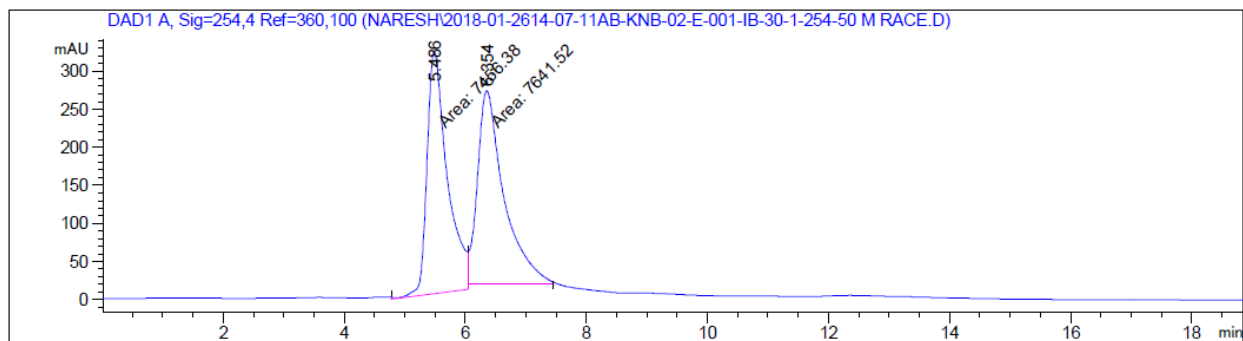

Signal 1: DAD1 A, Sig=254,4 Ref=360,100

| Peak # | RetTime [min] | Type | Width [min] | Area [mAU*s] | Height [mAU] | Area %  |
|--------|---------------|------|-------------|--------------|--------------|---------|
| 1      | 5.486         | MM   | 0.3911      | 7456.38379   | 317.74460    | 49.3869 |
| 2      | 6.354         | MM   | 0.5032      | 7641.51709   | 253.08270    | 50.6131 |

Totals : 1.50979e4 570.82730

\*\*\* End of Report \*\*\*

## HPLC data of compound (R)-4c

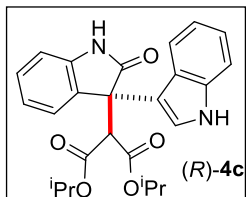

Data File C:\CHEM32\1\DATA\NARESH\2018-01-2614-47-16AB-KNB-02-E-001-IB-30-1-254-50 M CHI.D  
 Sample Name: AB-KNB-02-E-001-IB-30-1-254-50 M CHI

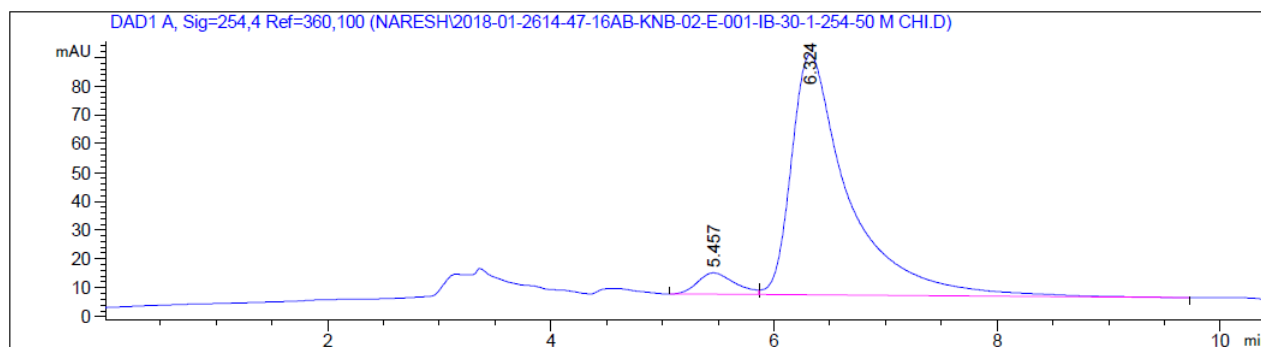

Signal 1: DAD1 A, Sig=254,4 Ref=360,100

| Peak # | RetTime [min] | Type | Width [min] | Area [mAU*s] | Height [mAU] | Area %  |
|--------|---------------|------|-------------|--------------|--------------|---------|
| 1      | 5.457         | BV   | 0.3505      | 172.50580    | 7.43912      | 5.4415  |
| 2      | 6.324         | VB   | 0.5144      | 2997.67676   | 83.58624     | 94.5585 |

Totals : 3170.18256 91.02535

\*\*\* End of Report \*\*\*

HPLC data of compound ( $\pm$ )-4d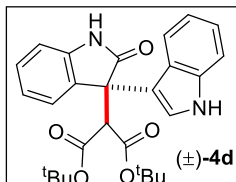

Data File C:\CHEM32\1\DATA\NARESH\2018-02-1422-35-25AB-KNB-02-268-R-OD3-50-1-254-50M RAC.D  
 Sample Name: AB-KNB-02-268-R-OD3-50-1-254-50M RAC

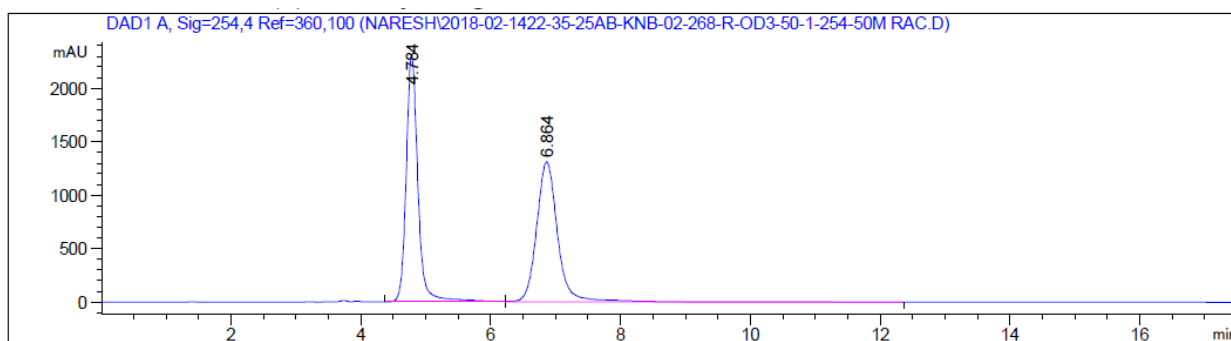

Signal 1: DAD1 A, Sig=254,4 Ref=360,100

| Peak # | RetTime [min] | Type | Width [min] | Area [mAU*s] | Height [mAU] | Area %  |
|--------|---------------|------|-------------|--------------|--------------|---------|
| 1      | 4.784         | BV   | 0.1911      | 2.91449e4    | 2311.79590   | 49.4875 |
| 2      | 6.864         | VB   | 0.3448      | 2.97486e4    | 1310.78491   | 50.5125 |

Totals : 5.88935e4 3622.58081

=====

\*\*\* End of Report \*\*\*

## HPLC data of compound (R)-4d

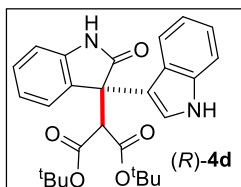

Data File C:\CHEM32\1\DATA\NARESH\2018-02-1422-19-51AB-KNB-02-268-R-OD3-50-1-254-50M CHI.D  
 Sample Name: AB-KNB-02-268-R-OD3-50-1-254-50M CHI

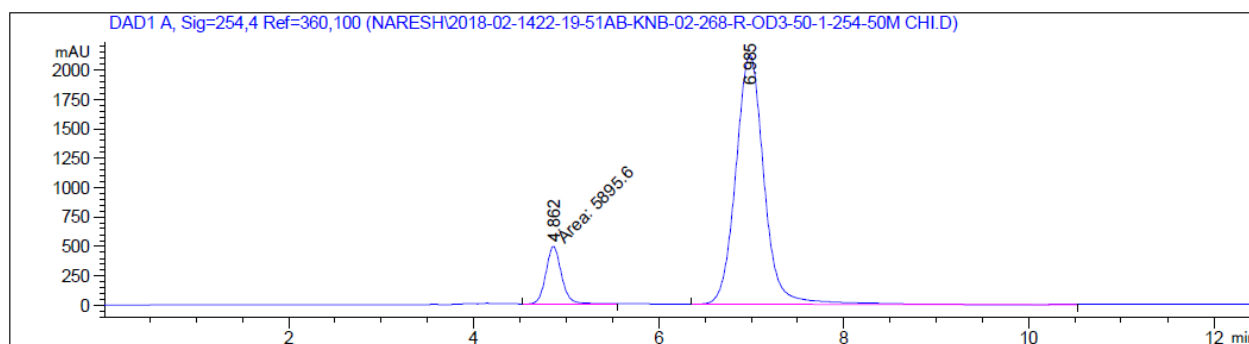

Signal 1: DAD1 A, Sig=254,4 Ref=360,100

| Peak # | RetTime [min] | Type | Width [min] | Area [mAU*s] | Height [mAU] | Area %  |
|--------|---------------|------|-------------|--------------|--------------|---------|
| 1      | 4.862         | MM   | 0.2001      | 5895.59717   | 491.08658    | 11.5294 |
| 2      | 6.985         | BBA  | 0.3270      | 4.52396e4    | 2119.83569   | 88.4706 |

Totals : 5.11352e4 2610.92227

\*\*\* End of Report \*\*\*

HPLC data of compound ( $\pm$ )-4e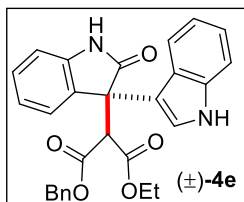

Data File C:\CHEM32\1\DATA\NARESH\2017-10-1209-47-08AB-KNB-02-255-R-AD-H-50-1-254-50M.D  
 Sample Name: AB-KNB-02-255-R-AD-H-50-1-254-50M

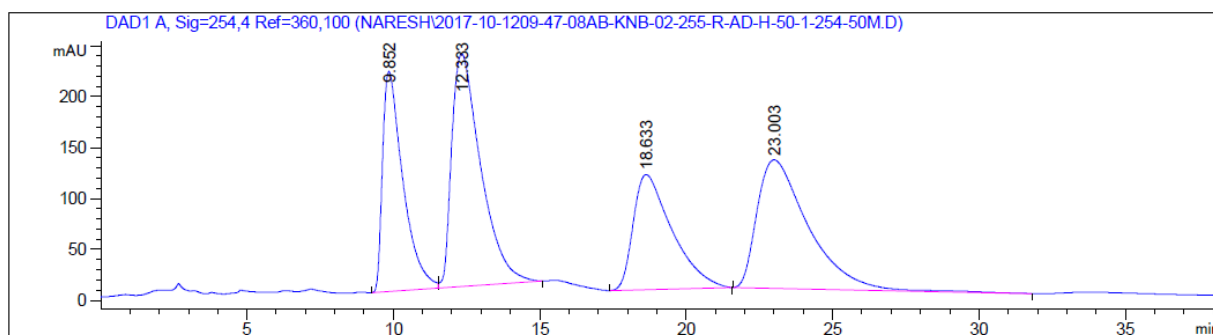

Signal 1: DAD1 A, Sig=254,4 Ref=360,100

| Peak # | RetTime [min] | Type | Width [min] | Area [mAU*s] | Height [mAU] | Area %  |
|--------|---------------|------|-------------|--------------|--------------|---------|
| 1      | 9.852         | BV   | 0.7148      | 1.04855e4    | 215.83139    | 20.1239 |
| 2      | 12.333        | VB   | 1.0442      | 1.58338e4    | 228.56190    | 30.3886 |
| 3      | 18.633        | BB   | 1.3373      | 1.03880e4    | 112.91732    | 19.9368 |
| 4      | 23.003        | BB   | 1.8207      | 1.53972e4    | 126.08580    | 29.5507 |

Totals : 5.21044e4 683.39642

=====

\*\*\* End of Report \*\*\*



## HPLC data of compound (R)-4e

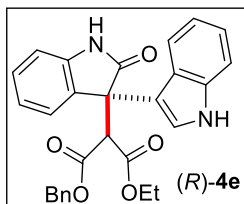

Data File C:\CHEM32\1\DATA\NARESH\2017-10-1121-53-38AB-KNB-02-265-R2-AD-H-50-1-254-50M.D

Sample Name: AB-KNB-02-265-R2-AD-H-50-1-254-50M

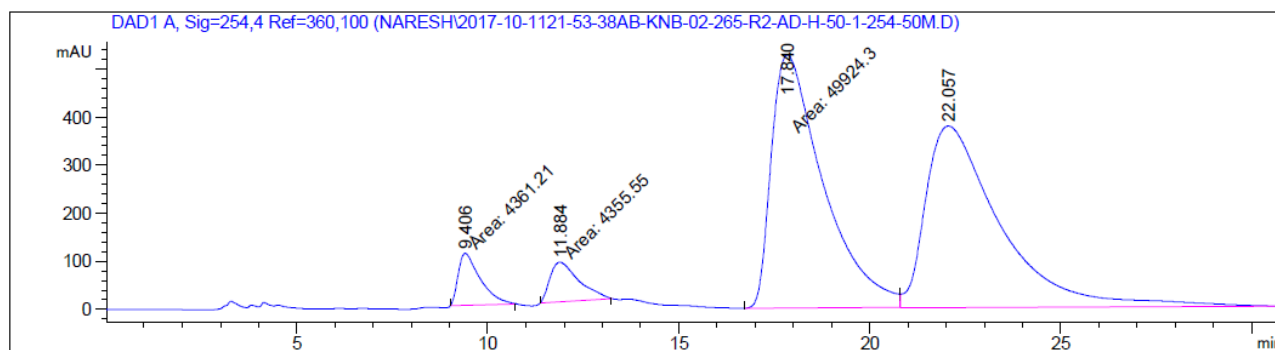

Signal 1: DAD1 A, Sig=254,4 Ref=360,100

| Peak # | RetTime [min] | Type | Width [min] | Area [mAU*s] | Height [mAU] | Area %  |
|--------|---------------|------|-------------|--------------|--------------|---------|
| 1      | 9.406         | MM   | 0.6707      | 4361.21436   | 108.37340    | 3.9545  |
| 2      | 11.884        | MM   | 0.8780      | 4355.54980   | 82.67854     | 3.9494  |
| 3      | 17.840        | MM   | 1.5772      | 4.99243e4    | 527.54572    | 45.2686 |
| 4      | 22.057        | VBA  | 1.9889      | 5.16434e4    | 378.23743    | 46.8275 |

Totals : 1.10284e5 1096.83508

\*\*\* End of Report \*\*\*

HPLC data of compound ( $\pm$ )-4f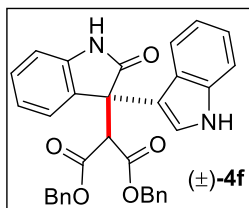

Data File C:\CHEM32\1\DATA\NARESH\2015-07-20AB-KNB-2-250-R-OD-3-50-254-1-50M.D

Sample Name: AB-KNB-2-250-R-OD-3-50-254-1-50M

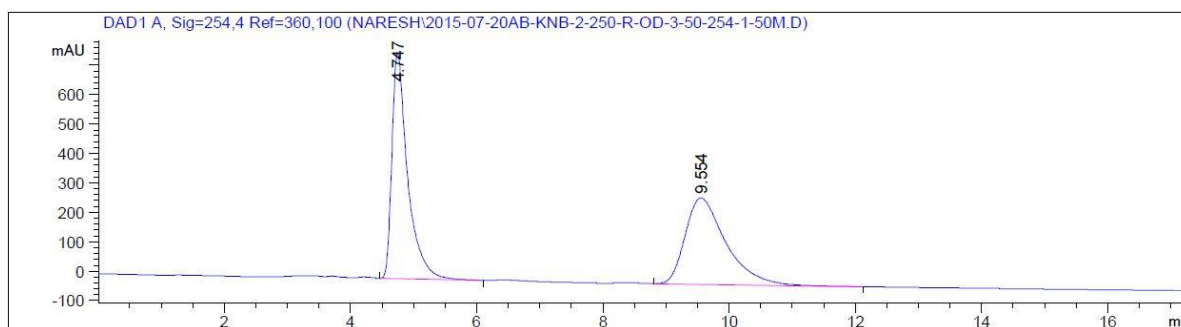

| Peak # | RetTime [min] | Type | Width [min] | Area [mAU*s] | Height [mAU] | Area %  |
|--------|---------------|------|-------------|--------------|--------------|---------|
| 1      | 4.747         | BB   | 0.2544      | 1.33140e4    | 767.55292    | 50.3227 |
| 2      | 9.554         | BBA  | 0.6749      | 1.31432e4    | 293.25589    | 49.6773 |

Totals : 2.64572e4 1060.80881

\*\*\* End of Report \*\*\*

## HPLC data of compound (R)-4f

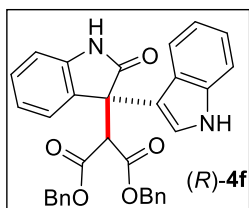

Data File C:\CHEM32\1\DATA\NARESH\AB-KNB-03-012-N11-OD-3-50-254-1-50M.D

Sample Name: AB-KNB-03-012-N11-OD-3-50-254-1-50M

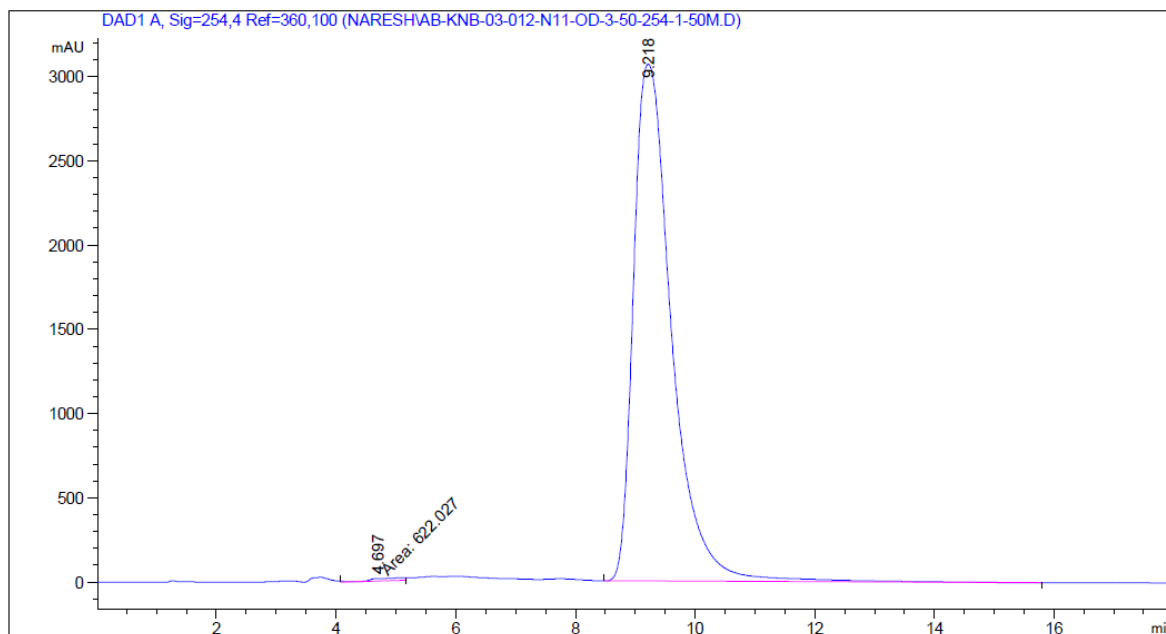

Signal 1: DAD1 A, Sig=254,4 Ref=360,100

| Peak # | RetTime [min] | Type | Width [min] | Area [mAU*s] | Height [mAU] | Area %  |
|--------|---------------|------|-------------|--------------|--------------|---------|
| 1      | 4.697         | MM   | 0.6926      | 622.02673    | 14.96861     | 0.4542  |
| 2      | 9.218         | BB   | 0.6744      | 1.36330e5    | 3068.00513   | 99.5458 |

Totals : 1.36952e5 3082.97373

\*\*\* End of Report \*\*\*

## HPLC data of compound (R)-4f from (R)-4a

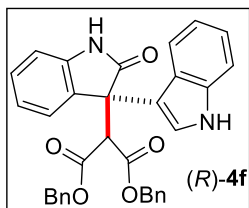

Data File C:\CHEM32\1\DATA\NARESH\2015-09-03AB-KNB-03-010-R-OD-3-50-254-1-50M.D  
 Sample Name: AB-KNB-03-010-R-OD-3-50-254-1-50M

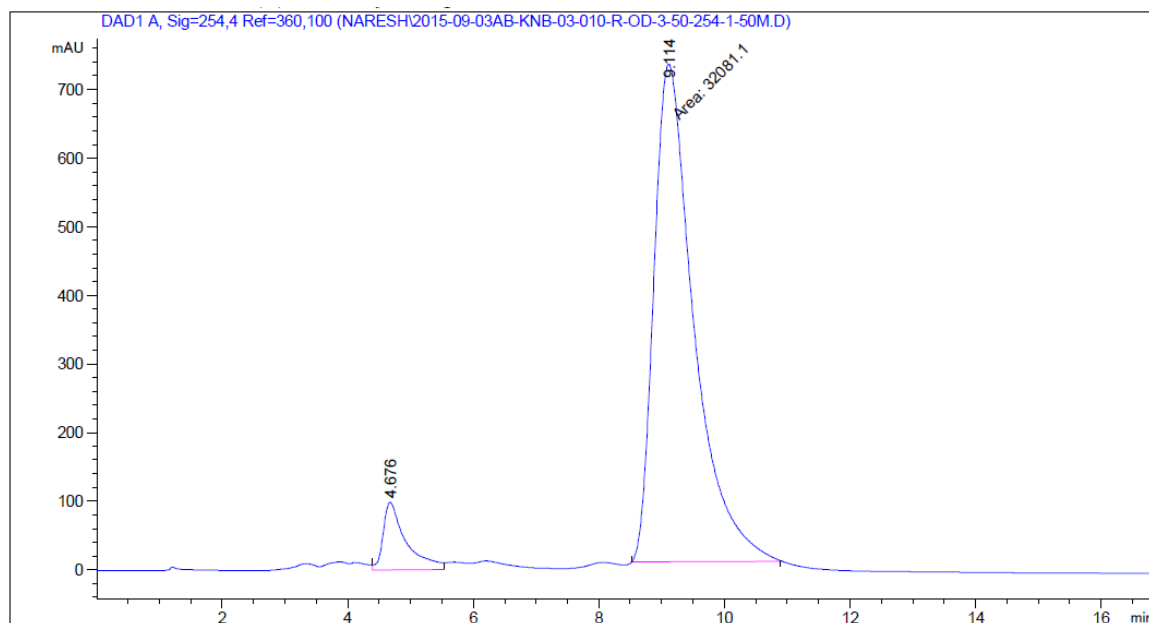

Signal 1: DAD1 A, Sig=254,4 Ref=360,100

| Peak # | RetTime [min] | Type | Width [min] | Area [mAU*s] | Height [mAU] | Area %  |
|--------|---------------|------|-------------|--------------|--------------|---------|
| 1      | 4.676         | VV   | 0.3572      | 2487.07837   | 98.29729     | 7.1947  |
| 2      | 9.114         | MM   | 0.7370      | 3.20811e4    | 725.46271    | 92.8053 |

Totals : 3.45682e4 823.76000

\*\*\* End of Report \*\*\*

**HPLC data of compound (±)-4g**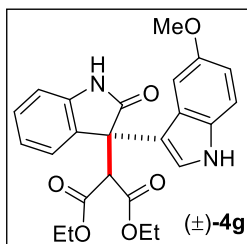

Data File C:\CHEM32\...\NARESH\2018-01-1512-38-31AB-KNB-04-346-2-IE-3-40-1-254-40 M RACE.D  
 Sample Name: AB-KNB-04-346-2-IE-3-40-1-254-40 M RACE

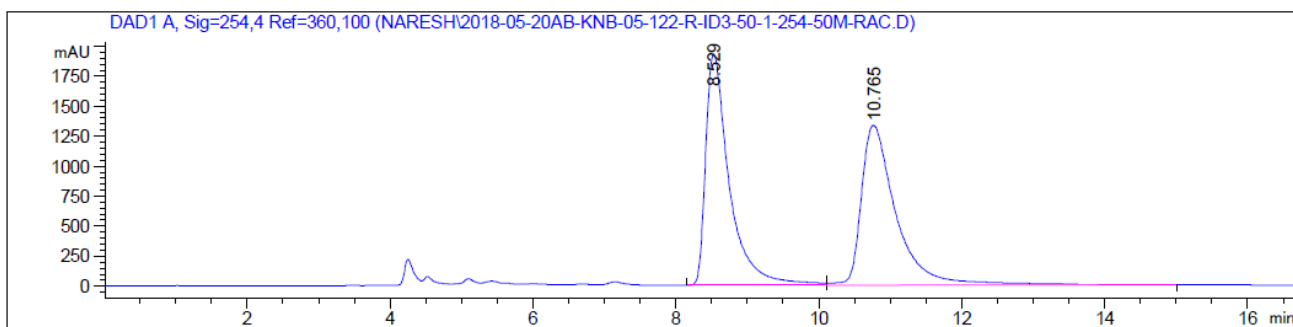

Signal 1: DAD1 A, Sig=254,4 Ref=360,100

| Peak # | RetTime [min] | Type | Width [min] | Area [mAU*s] | Height [mAU] | Area %  |
|--------|---------------|------|-------------|--------------|--------------|---------|
| 1      | 8.529         | BV   | 0.3407      | 4.44467e4    | 1929.58862   | 49.5523 |
| 2      | 10.765        | VB   | 0.5020      | 4.52498e4    | 1332.96252   | 50.4477 |

Totals : 8.96965e4 3262.55115

\*\*\* End of Report \*\*\*

## HPLC data of compound (R)-4g

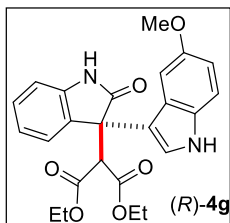

Data File C:\CHEM32\...A\NARESH\2018-01-1512-58-24AB-KNB-04-347-2-IE-3-40-1-254-40 M CHI.D  
 Sample Name: AB-KNB-04-347-2-IE-3-40-1-254-40 M CHI

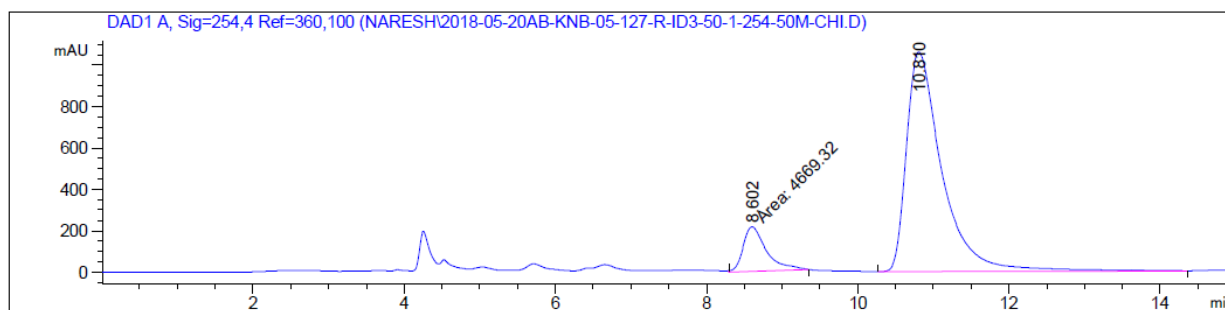

Signal 1: DAD1 A, Sig=254,4 Ref=360,100

| Peak # | RetTime [min] | Type | Width [min] | Area [mAU*s] | Height [mAU] | Area %  |
|--------|---------------|------|-------------|--------------|--------------|---------|
| 1      | 8.602         | MM   | 0.3599      | 4669.31934   | 216.20741    | 11.8231 |
| 2      | 10.810        | BB   | 0.4874      | 3.48239e4    | 1059.78052   | 88.1769 |

Totals : 3.94932e4 1275.98793

\*\*\* End of Report \*\*\*

HPLC data of compound ( $\pm$ )-4h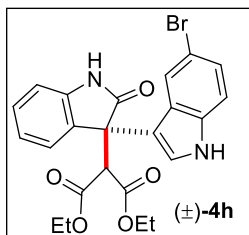

Data File C:\CHEM32\...TA\NARESH\2018-03-1011-18-24AB-KNB-05-061-IB-30-1-254-50M-RACEMIC.D  
 Sample Name: AB-KNB-05-061-IB-30-1-254-50M-RACEMIC

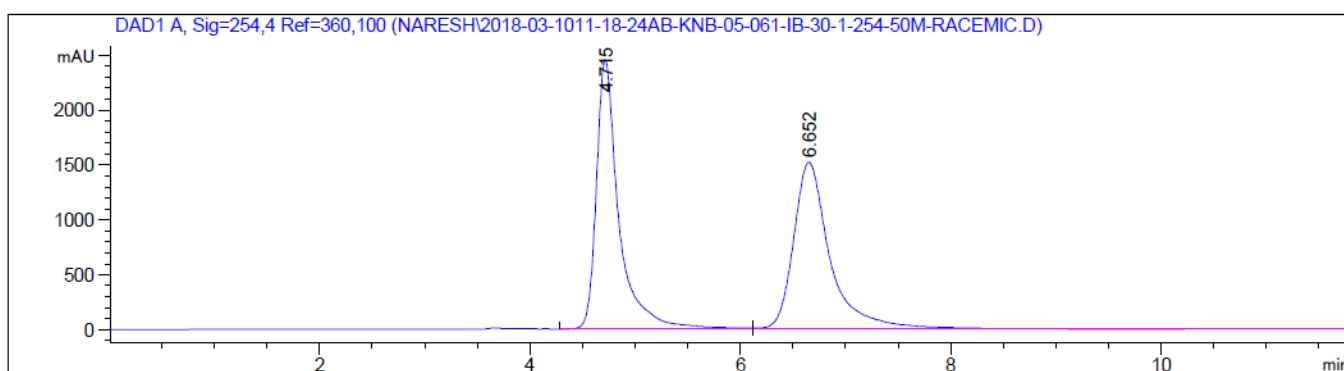

Signal 1: DAD1 A, Sig=254,4 Ref=360,100

| Peak # | RetTime [min] | Type | Width [min] | Area [mAU*s] | Height [mAU] | Area %  |
|--------|---------------|------|-------------|--------------|--------------|---------|
| 1      | 4.715         | BV   | 0.2161      | 3.65746e4    | 2451.00928   | 49.5987 |
| 2      | 6.652         | VBA  | 0.3596      | 3.71663e4    | 1518.29858   | 50.4013 |

Totals : 7.37409e4 3969.30786

\*\*\* End of Report \*\*\*

## HPLC data of compound (R)-4h

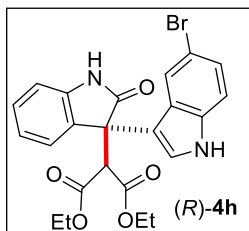

Data File C:\CHEM32\1\DATA\NARESH\2018-03-1011-32-49AB-KNB-05-061-IB-30-1-254-50M-CHIRAL.D  
 Sample Name: AB-KNB-05-061-IB-30-1-254-50M-CHIRAL

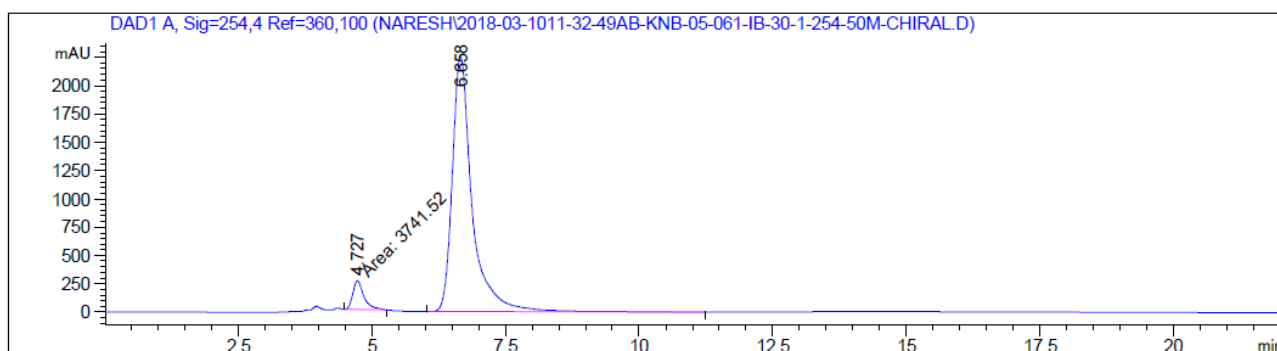

Signal 1: DAD1 A, Sig=254,4 Ref=360,100

| Peak # | RetTime [min] | Type | Width [min] | Area [mAU*s] | Height [mAU] | Area %  |
|--------|---------------|------|-------------|--------------|--------------|---------|
| 1      | 4.727         | MM   | 0.2430      | 3741.52417   | 256.66464    | 6.0244  |
| 2      | 6.658         | BB   | 0.3800      | 5.83646e4    | 2254.83691   | 93.9756 |

Totals : 6.21061e4 2511.50156



HPLC data of compound ( $\pm$ )-4i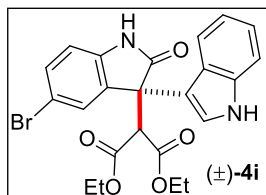

Data File C:\CHEM32\1\DATA\NARESH\2018-02-0619-14-30AB-KNB-E-02-205-IB-30-1-254-50M RAC.D  
 Sample Name: AB-KNB-E-02-205-IB-30-1-254-50M RAC

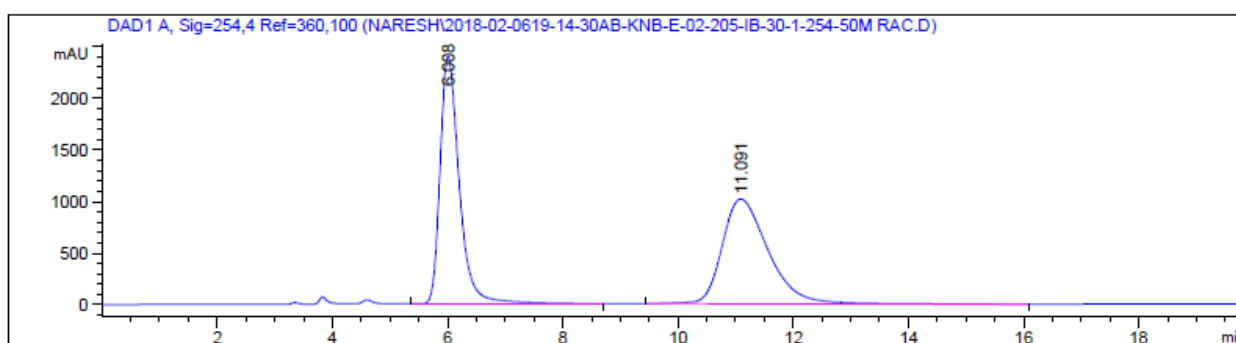

Signal 1: DAD1 A, Sig=254,4 Ref=360,100

| Peak # | RetTime [min] | Type | Width [min] | Area [mAU*s] | Height [mAU] | Area %  |
|--------|---------------|------|-------------|--------------|--------------|---------|
| 1      | 6.008         | BB   | 0.3547      | 5.54719e4    | 2390.49780   | 49.7126 |
| 2      | 11.091        | BBA  | 0.8487      | 5.61132e4    | 1012.32666   | 50.2874 |

Totals : 1.11585e5 3402.82446

\*\*\* End of Report \*\*\*

## HPLC data of compound (R)-4i

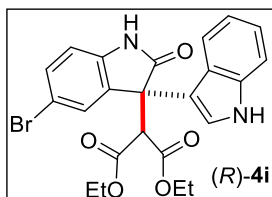

Data File C:\CHEM32\1\DATA\NARESH\2018-02-0620-57-23AB-KNB-E-02-271-IB-30-1-254-50M CHI.D  
 Sample Name: AB-KNB-E-02-271-IB-30-1-254-50M CHI

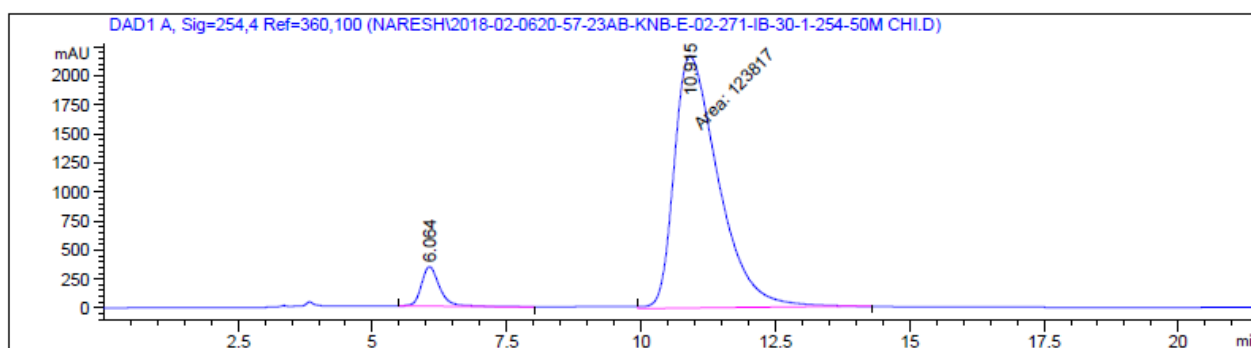

Signal 1: DAD1 A, Sig=254,4 Ref=360,100

| Peak # | RetTime [min] | Type | Width [min] | Area [mAU*s] | Height [mAU] | Area %  |
|--------|---------------|------|-------------|--------------|--------------|---------|
| 1      | 6.064         | BB   | 0.3577      | 8029.52490   | 339.73129    | 6.0901  |
| 2      | 10.915        | MM   | 0.9542      | 1.23817e5    | 2162.68433   | 93.9099 |

Totals : 1.31846e5 2502.41562

\*\*\* End of Report \*\*\*

HPLC data of compound ( $\pm$ )-4j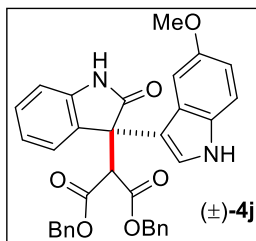

Data File C:\CHEM32\1\DATA\NARESH\2018-03-1210-25-34AB-KNB-02-280-ID3-50-1-254-50M-RACE.D

Sample Name: AB-KNB-02-280-ID3-50-1-254-50M-RACE

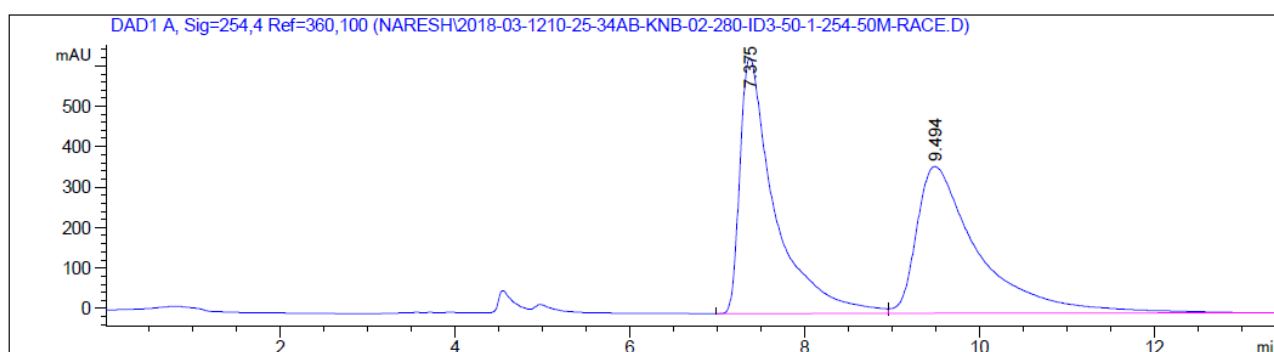

Signal 1: DAD1 A, Sig=254,4 Ref=360,100

| Peak # | RetTime [min] | Type | Width [min] | Area [mAU*s] | Height [mAU] | Area %  |
|--------|---------------|------|-------------|--------------|--------------|---------|
| 1      | 7.375         | BV   | 0.3940      | 1.75442e4    | 631.78333    | 49.4226 |
| 2      | 9.494         | VBA  | 0.7071      | 1.79542e4    | 362.98605    | 50.5774 |

Totals : 3.54984e4 994.76938

\*\*\* End of Report \*\*\*

## HPLC data of compound (R)-4j

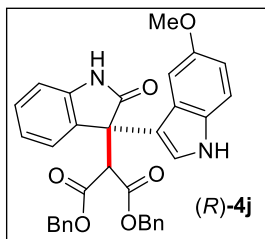

Data File C:\CHEM32\1\DATA\NARESH\2018-03-1210-41-58AB-KNB-02-280-ID3-50-1-254-50M-CHI.D

Sample Name: AB-KNB-02-280-ID3-50-1-254-50M-CHI

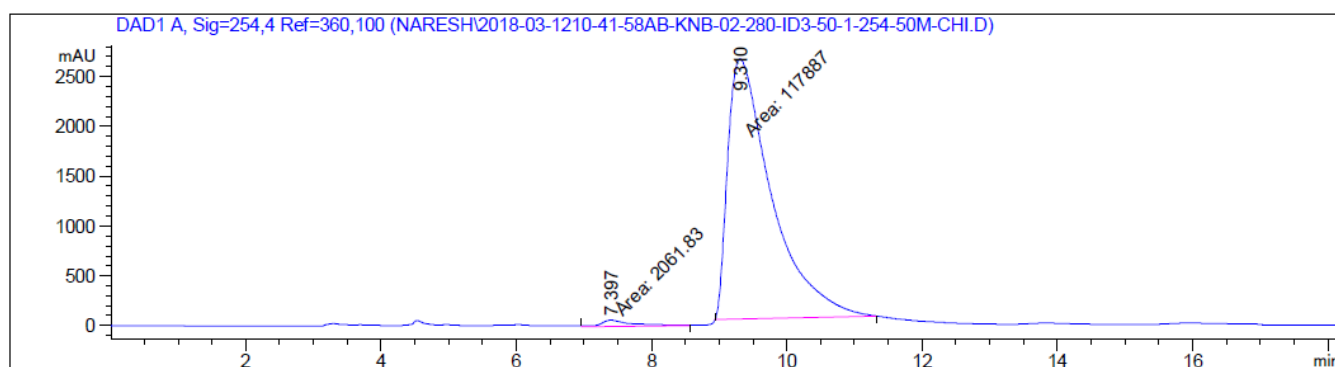

Signal 1: DAD1 A, Sig=254,4 Ref=360,100

| Peak # | RetTime [min] | Type | Width [min] | Area [mAU*s] | Height [mAU] | Area %  |
|--------|---------------|------|-------------|--------------|--------------|---------|
| 1      | 7.397         | MM   | 0.5511      | 2061.82764   | 62.35340     | 1.7189  |
| 2      | 9.310         | MM   | 0.7533      | 1.17887e5    | 2608.17261   | 98.2811 |

Totals : 1.19949e5 2670.52600

\*\*\* End of Report \*\*\*

**HPLC data of compound (±)-4k**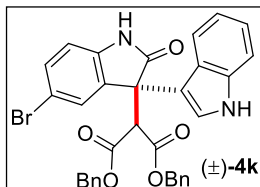

Data File C:\CHEM32\1\DATA\NARESH\2015-08-03AB-KNB-2-281-RACEMIC-3-OD-3-40-254-1-60.D

Sample Name: AB-KNB-2-281-RACEMIC-3-OD-3-40-254-1-60

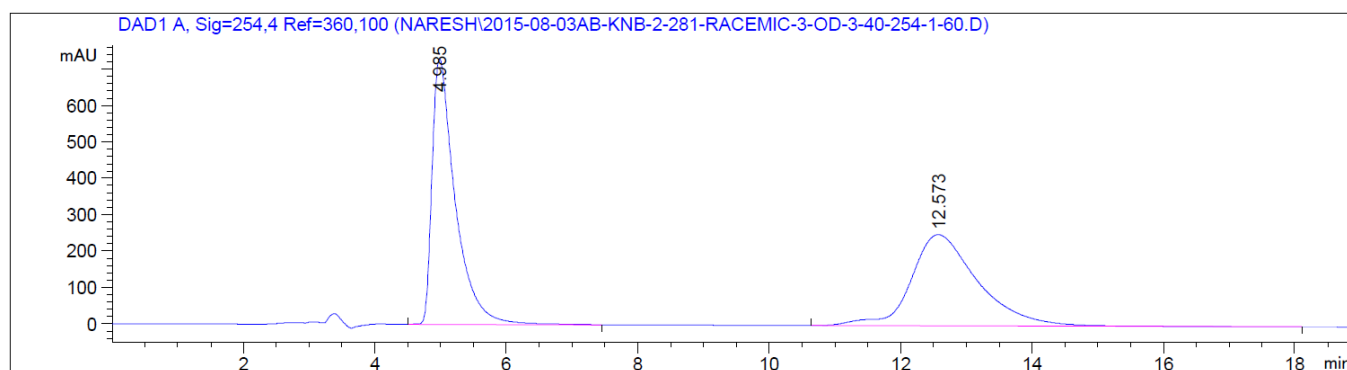

| Peak # | RetTime [min] | Type | Width [min] | Area [mAU*s] | Height [mAU] | Area %  |
|--------|---------------|------|-------------|--------------|--------------|---------|
| 1      | 4.985         | BB   | 0.3610      | 1.78174e4    | 729.31091    | 50.1061 |
| 2      | 12.573        | BBA  | 1.0449      | 1.77419e4    | 250.93648    | 49.8939 |

Totals : 3.55593e4 980.24739

=====  
 \*\*\* End of Report \*\*\*

## HPLC data of compound (R)-4k

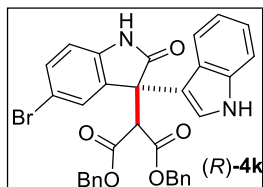

Data File C:\CHEM32\1\DATA\NARESH\AB-KNB-03-266-F-OD-3-40-254-1-60M.D

Sample Name: AB-KNB-03-266-F-OD-3-40-254-1-60M

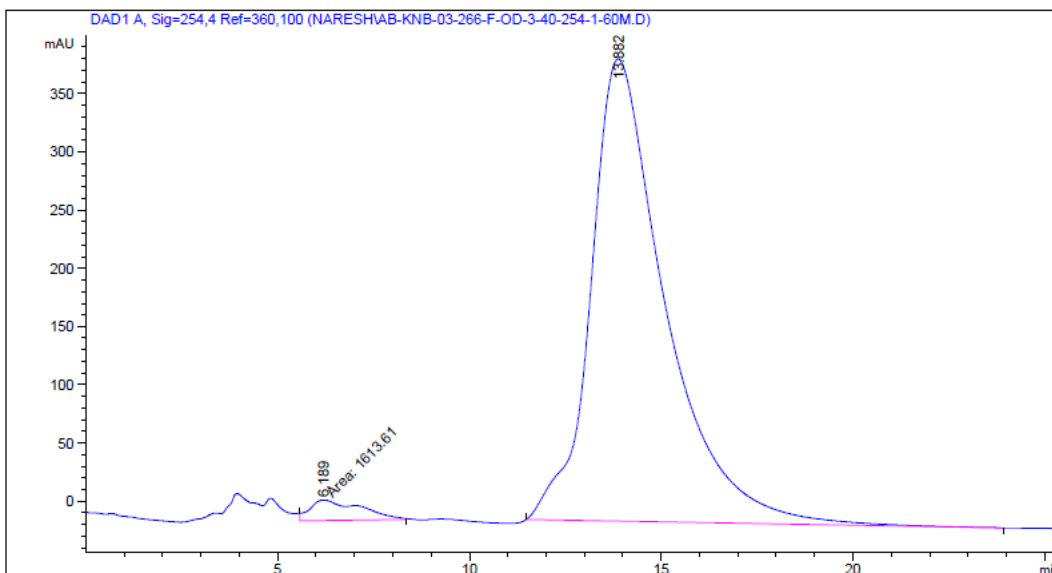

Signal 1: DAD1 A, Sig=254,4 Ref=360,100

| Peak # | RetTime [min] | Type | Width [min] | Area [mAU*s] | Height [mAU] | Area %  |
|--------|---------------|------|-------------|--------------|--------------|---------|
| 1      | 6.189         | MM   | 1.5425      | 1613.61279   | 17.43466     | 2.9237  |
| 2      | 13.882        | BBA  | 1.9180      | 5.35778e4    | 396.61786    | 97.0763 |

Totals : 5.51914e4 414.05252

=====  
 \*\*\* End of Report \*\*\*

**HPLC data of compound ( $\pm$ )-4l**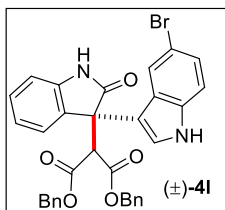

Data File C:\CHEM32\1\DATA\NARESH\2015-08-03AB-KNB-2-279-RACEMIC-OD-3-40-254-1-60.D

Sample Name: AB-KNB-2-279-RACEMIC-OD-3-40-254-1-60

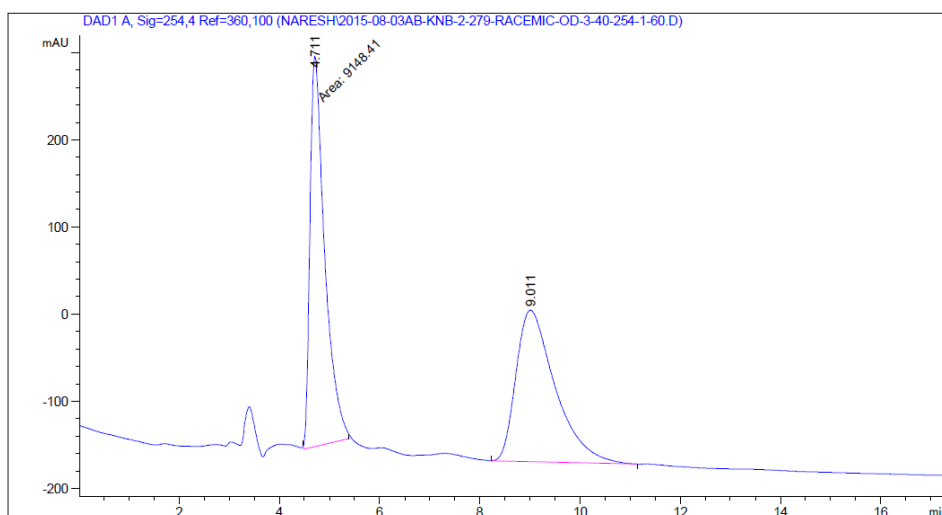

Signal 1: DAD1 A, Sig=254,4 Ref=360,100

| Peak # | RetTime [min] | Type | Width [min] | Area [mAU*s] | Height [mAU] | Area %  |
|--------|---------------|------|-------------|--------------|--------------|---------|
| 1      | 4.711         | MM   | 0.3406      | 9148.41016   | 447.67456    | 49.2353 |
| 2      | 9.011         | BB   | 0.8137      | 9432.57910   | 173.66725    | 50.7647 |

Totals : 1.85810e4 621.34181

\*\*\* End of Report \*\*\*

## HPLC data of compound (R)-4I

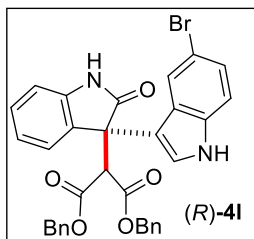

Data File C:\CHEM32\1\DATA\NARESH\AB-KNB-03-265-F1-OD-3-40-254-1-60M.D  
 Sample Name: AB-KNB-03-265-F1-OD-3-40-254-1-60M

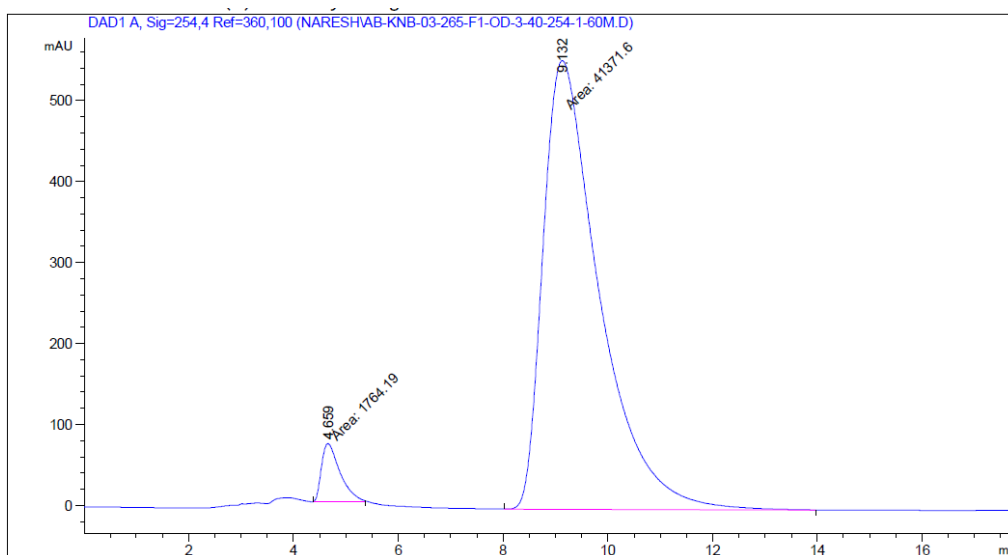

Signal 1: DAD1 A, Sig=254,4 Ref=360,100

| Peak # | RetTime [min] | Type | Width [min] | Area [mAU*s] | Height [mAU] | Area %  |
|--------|---------------|------|-------------|--------------|--------------|---------|
| 1      | 4.659         | MM   | 0.4098      | 1764.18835   | 71.75163     | 4.0898  |
| 2      | 9.132         | MM   | 1.2439      | 4.13716e4    | 554.30914    | 95.9102 |

Totals : 4.31358e4 626.06078

\*\*\* End of Report \*\*\*



HPLC data of compound ( $\pm$ )-4m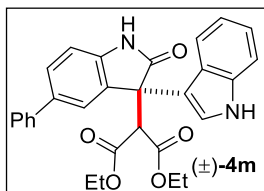

Data File C:\CHEM32\...\NARESH\2018-01-2617-08-57AB-KNB-A-03-E-303-IB-40-1-254-50 M RACE.D  
 Sample Name: AB-KNB-A-03-E-303-IB-40-1-254-50 M RACE

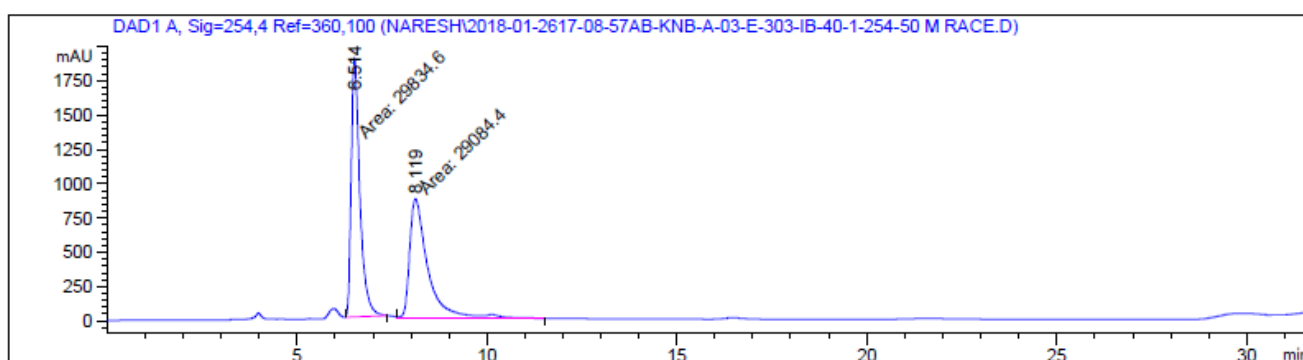

Signal 1: DAD1 A, Sig=254,4 Ref=360,100

| Peak # | RetTime [min] | Type | Width [min] | Area [mAU*s] | Height [mAU] | Area %  |
|--------|---------------|------|-------------|--------------|--------------|---------|
| 1      | 6.514         | MM   | 0.2646      | 2.98346e4    | 1879.07813   | 50.6366 |
| 2      | 8.119         | MM   | 0.5584      | 2.90844e4    | 868.13904    | 49.3634 |

Totals : 5.89189e4 2747.21716

\*\*\* End of Report \*\*\*

## HPLC data of compound (R)-4m

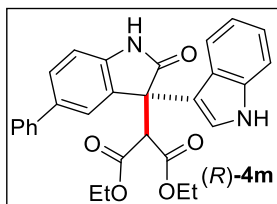

Data File C:\CHEM32\...\NARESH\2018-01-2622-22-52AB-KNB-A-03-001-ADH-40-1-254-50M CHIRAL.D  
 Sample Name: AB-KNB-A-03-001-ADH-40-1-254-50M CHIRAL

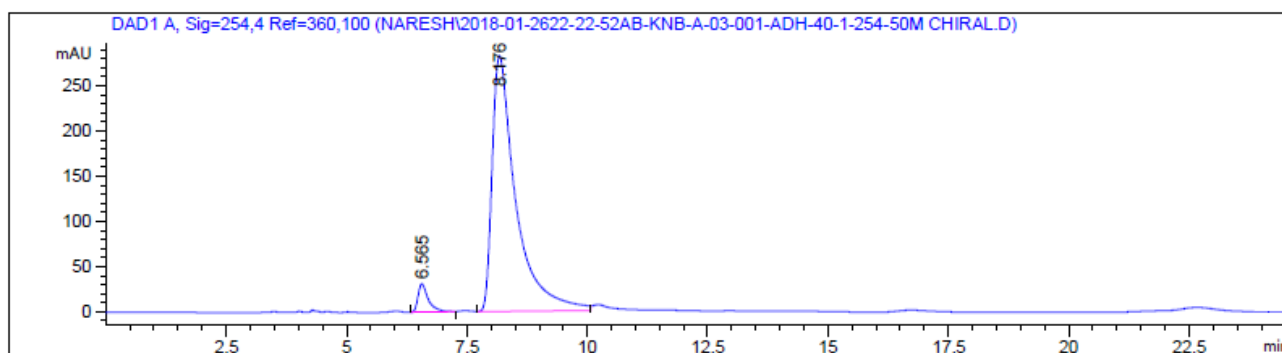

Signal 1: DAD1 A, Sig=254,4 Ref=360,100

| Peak # | RetTime [min] | Type | Width [min] | Area [mAU*s] | Height [mAU] | Area %  |
|--------|---------------|------|-------------|--------------|--------------|---------|
| 1      | 6.565         | BB   | 0.2145      | 454.80374    | 31.11750     | 4.4828  |
| 2      | 8.176         | BV   | 0.4949      | 9690.63867   | 281.99026    | 95.5172 |

Totals : 1.01454e4 313.10776

\*\*\* End of Report \*\*\*

**HPLC data of compound ( $\pm$ )-4n**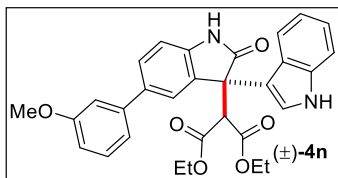

Data File C:\CHEM32\1\DATA\NARESH\2018-02-1317-34-13AB-KNB-05-048-ID3-50-1-254-50MRAC.D

Sample Name: AB-KNB-05-048-ID3-50-1-254-50MRAC

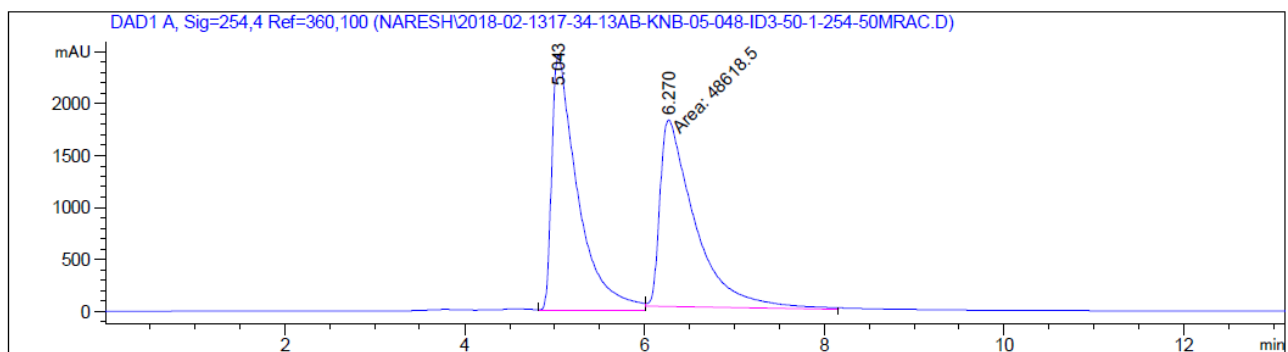

Signal 1: DAD1 A, Sig=254,4 Ref=360,100

| Peak # | RetTime [min] | Type | Width [min] | Area [mAU*s] | Height [mAU] | Area %  |
|--------|---------------|------|-------------|--------------|--------------|---------|
| 1      | 5.043         | VV   | 0.2780      | 4.92836e4    | 2457.59082   | 50.3397 |
| 2      | 6.270         | MM   | 0.4505      | 4.86185e4    | 1798.77979   | 49.6603 |

Totals : 9.79021e4 4256.37061

\*\*\* End of Report \*\*\*

## HPLC data of compound (R)-4n

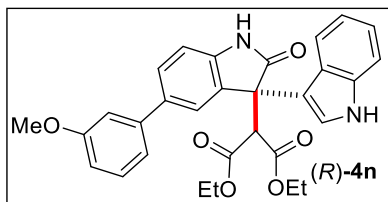

Data File C:\CHEM32\1\DATA\NARESH\2018-02-1317-56-33AB-KNB-03-303-IB3-40-1-254-50MCHI.D  
 Sample Name: AB-KNB-03-303-IB3-40-1-254-50MCHI

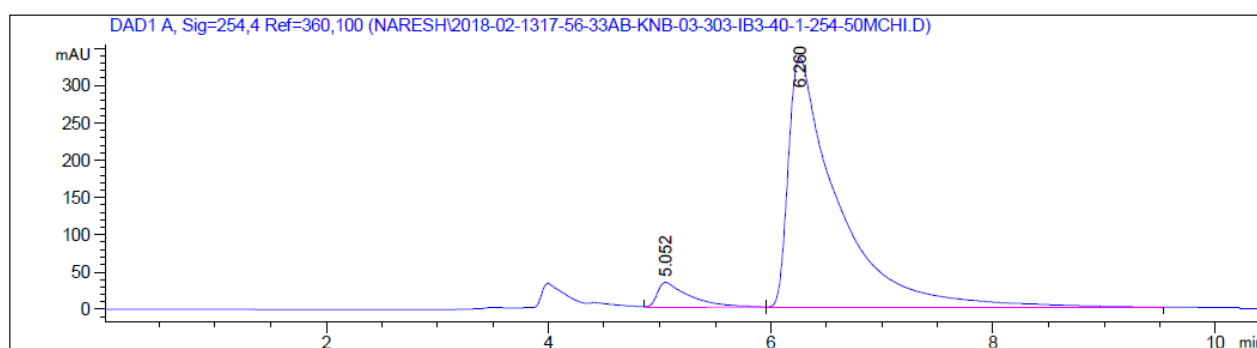

Signal 1: DAD1 A, Sig=254,4 Ref=360,100

| Peak # | RetTime [min] | Type | Width [min] | Area [mAU*s] | Height [mAU] | Area %  |
|--------|---------------|------|-------------|--------------|--------------|---------|
| 1      | 5.052         | VB   | 0.2734      | 670.75250    | 33.53104     | 6.0841  |
| 2      | 6.260         | BB   | 0.4213      | 1.03540e4    | 334.37375    | 93.9159 |

Totals : 1.10247e4 367.90479

\*\*\* End of Report \*\*\*

HPLC data of compound ( $\pm$ )-4o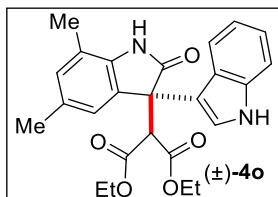

Data File C:\CHEM32\1\DATA\NARESH\2018-02-1414-37-51AB-KNB-05-037R-ID3-30-1-254-50M RAC.D  
 Sample Name: AB-KNB-05-037R-ID3-30-1-254-50M RAC

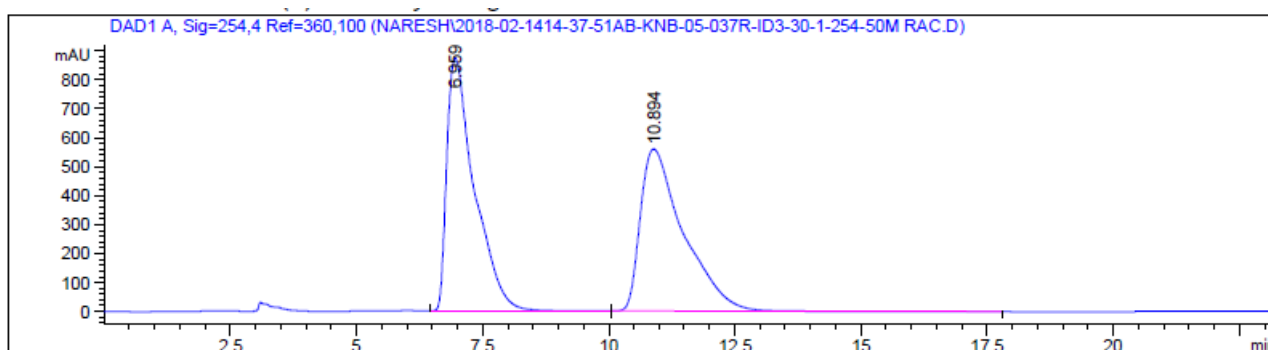

Signal 1: DAD1 A, Sig=254,4 Ref=360,100

| Peak # | RetTime [min] | Type | Width [min] | Area [mAU*s] | Height [mAU] | Area %  |
|--------|---------------|------|-------------|--------------|--------------|---------|
| 1      | 6.959         | VB   | 0.5579      | 3.32450e4    | 873.78833    | 49.9643 |
| 2      | 10.894        | BB   | 0.8681      | 3.32924e4    | 559.60413    | 50.0357 |

Totals : 6.65374e4 1433.39246

\*\*\* End of Report \*\*\*

## HPLC data of compound (R)-4o

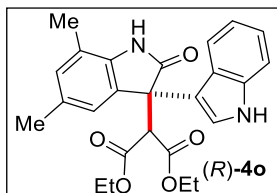

Data File C:\CHEM32\1\DATA\NARESH\2018-02-1415-04-43AB-KNB-05-037R-ID3-30-1-254-50M CHI.D  
 Sample Name: AB-KNB-05-037R-ID3-30-1-254-50M CHI

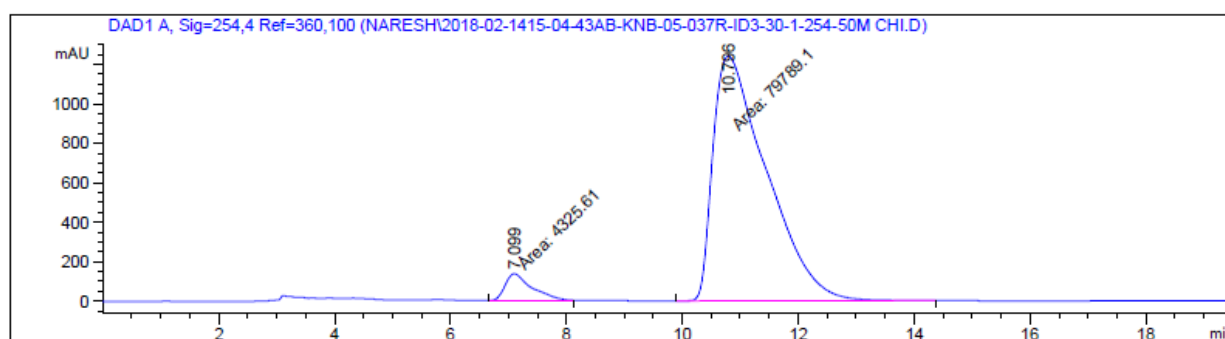

Signal 1: DAD1 A, Sig=254,4 Ref=360,100

| Peak # | RetTime [min] | Type | Width [min] | Area [mAU*s] | Height [mAU] | Area %  |
|--------|---------------|------|-------------|--------------|--------------|---------|
| 1      | 7.099         | MM   | 0.5332      | 4325.61035   | 135.20688    | 5.1425  |
| 2      | 10.796        | MM   | 1.0725      | 7.97891e4    | 1239.91064   | 94.8575 |

Totals : 8.41147e4 1375.11752

\*\*\* End of Report \*\*\*

**HPLC data of compound ( $\pm$ )-4p**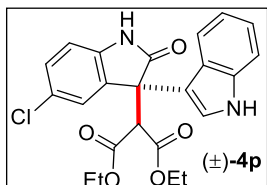

Data File C:\CHEM32\1\DATA\NARESH\2018-02-1421-28-55AB-KNB-02-207-OD3-30-1-254-50M RAC.D

Sample Name: AB-KNB-02-207-OD3-30-1-254-50M RAC

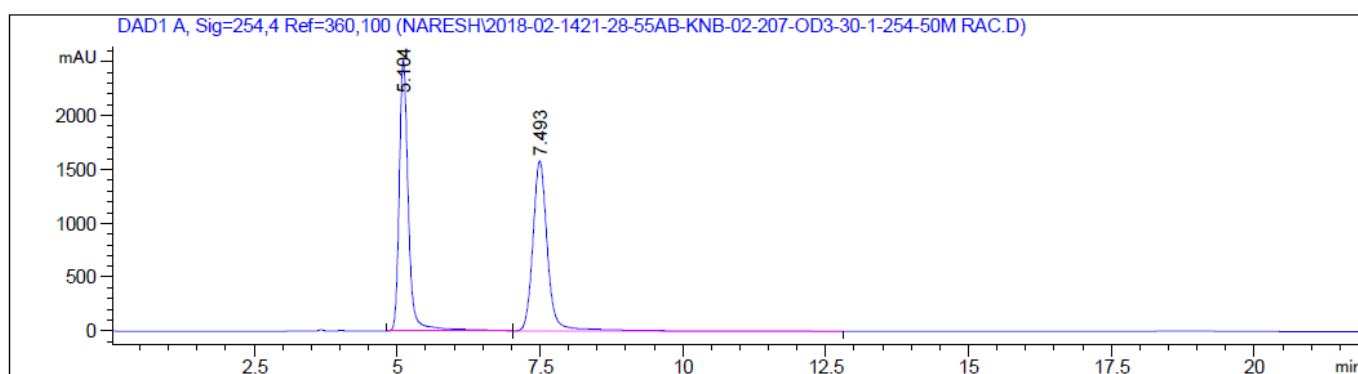

Signal 1: DAD1 A, Sig=254,4 Ref=360,100

| Peak # | RetTime [min] | Type | Width [min] | Area [mAU*s] | Height [mAU] | Area %  |
|--------|---------------|------|-------------|--------------|--------------|---------|
| 1      | 5.104         | BV   | 0.1700      | 2.83956e4    | 2509.90649   | 49.7502 |
| 2      | 7.493         | VB   | 0.2763      | 2.86807e4    | 1576.14160   | 50.2498 |

Totals : 5.70763e4 4086.04810

\*\*\* End of Report \*\*\*

## HPLC data of compound (R)-4p

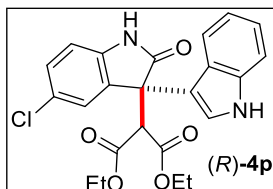

Data File C:\CHEM32\1\DATA\NARESH\2018-02-1421-16-00AB-KNB-02-207-OD3-30-1-254-50M CHI.D  
 Sample Name: AB-KNB-02-207-OD3-30-1-254-50M CHI

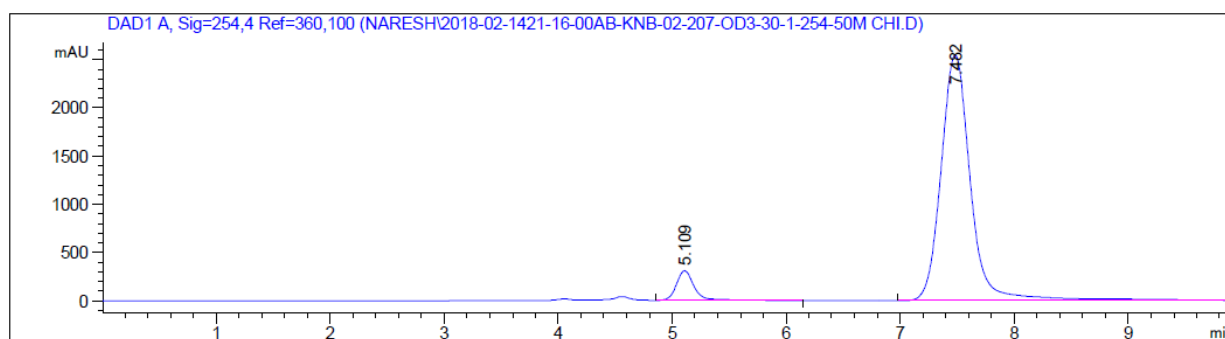

Signal 1: DAD1 A, Sig=254,4 Ref=360,100

| Peak # | RetTime [min] | Type | Width [min] | Area [mAU*s] | Height [mAU] | Area %  |
|--------|---------------|------|-------------|--------------|--------------|---------|
| 1      | 5.109         | VB   | 0.1667      | 3396.52783   | 307.95407    | 6.8866  |
| 2      | 7.482         | BBA  | 0.2746      | 4.59240e4    | 2543.94702   | 93.1134 |

Totals : 4.93205e4 2851.90109

\*\*\* End of Report \*\*\*



HPLC data of compound ( $\pm$ )-4q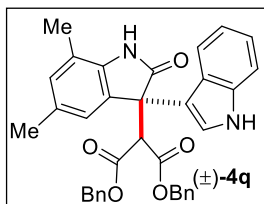

Data File C:\CHEM32\1\DATA\NARESH\2016-06-15AB-KNB-03-292-AD-H-50-1-60M.D

Sample Name: AB-KNB-03-292-AD-H-50-1-60M

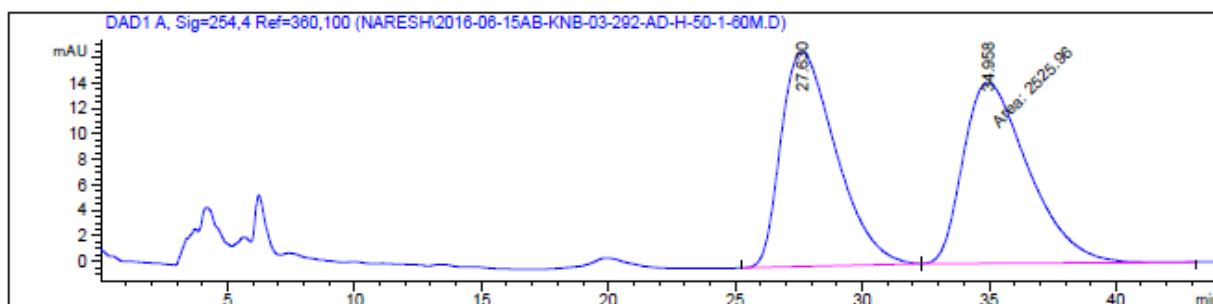

| Peak # | RetTime [min] | Type | Width [min] | Area [mAU*s] | Height [mAU] | Area %  |
|--------|---------------|------|-------------|--------------|--------------|---------|
| 1      | 27.630        | BB   | 2.1526      | 2533.41504   | 16.84519     | 50.0737 |
| 2      | 34.958        | MM   | 2.9643      | 2525.95923   | 14.20229     | 49.9263 |

Totals : 5059.37427 31.04748

## HPLC data of compound (R)-4q

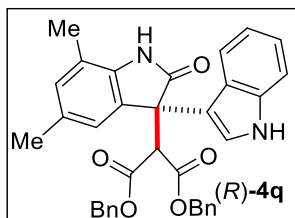

Data File C:\CHEM32\1\DATA\NARESH\2016-06-16AB-KNB-03-310-F1-AD-H-50-1-60M.D  
 Sample Name: AB-KNB-03-310-F1-AD-H-50-1-60M

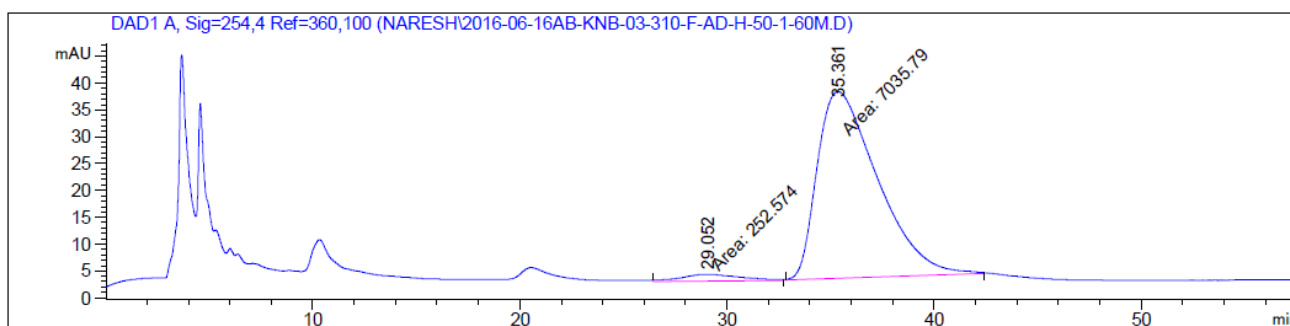

Signal 1: DAD1 A, Sig=254,4 Ref=360,100

| Peak # | RetTime [min] | Type | Width [min] | Area [mAU*s] | Height [mAU] | Area %  |
|--------|---------------|------|-------------|--------------|--------------|---------|
| 1      | 29.052        | MM   | 3.3103      | 252.57382    | 1.27165      | 3.4654  |
| 2      | 35.361        | MM   | 3.3765      | 7035.78955   | 34.72888     | 96.5346 |

Totals : 7288.36337 36.00053

HPLC data of compound ( $\pm$ )-4r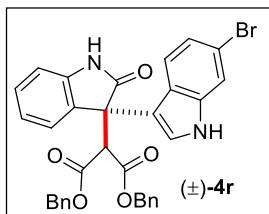

Data File C:\CHEM32\1\DATA\NARESH\2018-05-10AB-KNB-04-112-RAC-ID-3-40-254-50M.D

Sample Name: AB-KNB-04-112-RAC-ID-3-40-254-50M

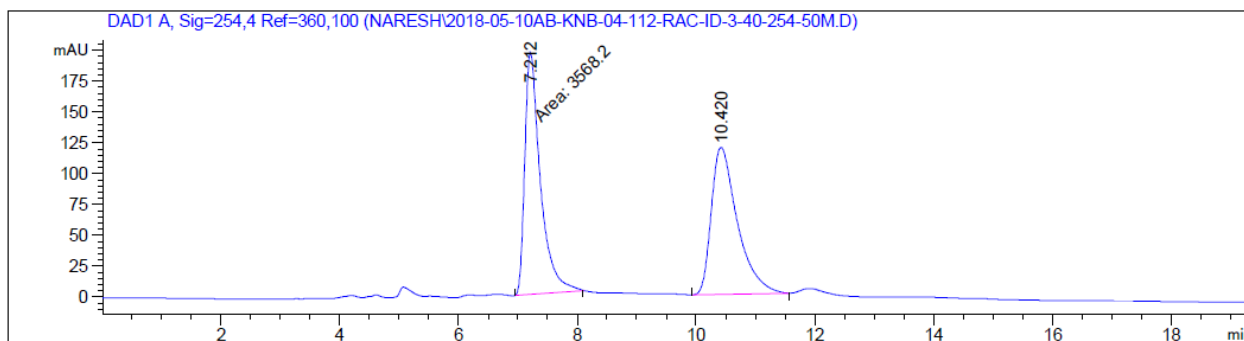

| Peak # | RetTime [min] | Type | Width [min] | Area [mAU*s] | Height [mAU] | Area %  |
|--------|---------------|------|-------------|--------------|--------------|---------|
| 1      | 7.212         | MM   | 0.3040      | 3568.20166   | 195.62561    | 49.5866 |
| 2      | 10.420        | BB   | 0.4554      | 3627.69629   | 119.09343    | 50.4134 |

Totals :                                      7195.89795    314.71904

\*\*\* End of Report \*\*\*

## HPLC data of compound (R)-4r

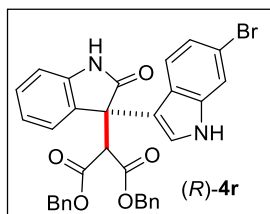

Data File C:\CHEM32\1\DATA\NARESH\2018-05-10AB-KNB-05-123-4-CHI-ID-3-40-254-50M.D

Sample Name: AB-KNB-05-123-4-CHI-ID-3-40-254-50M

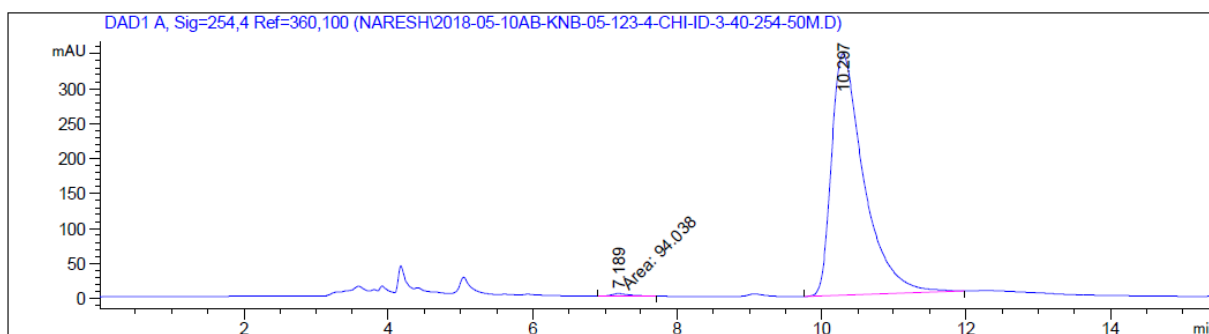

Signal 1: DAD1 A, Sig=254,4 Ref=360,100

| Peak # | RetTime [min] | Type | Width [min] | Area [mAU*s] | Height [mAU] | Area %  |
|--------|---------------|------|-------------|--------------|--------------|---------|
| 1      | 7.189         | MM   | 0.3595      | 94.03797     | 4.35985      | 0.8658  |
| 2      | 10.297        | BB   | 0.4638      | 1.07675e4    | 345.30496    | 99.1342 |

Totals : 1.08615e4 349.66482

\*\*\* End of Report \*\*\*

HPLC data of compound ( $\pm$ )-4s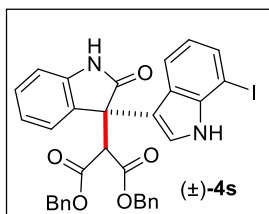

Data File C:\CHEM32\1\DATA\NARESH\2018-05-20AB-KNB-05-122-2-IC3-50-1-254-50M-RAC.D

Sample Name: AB-KNB-05-122-2-IC3-50-1-254-50M-RAC

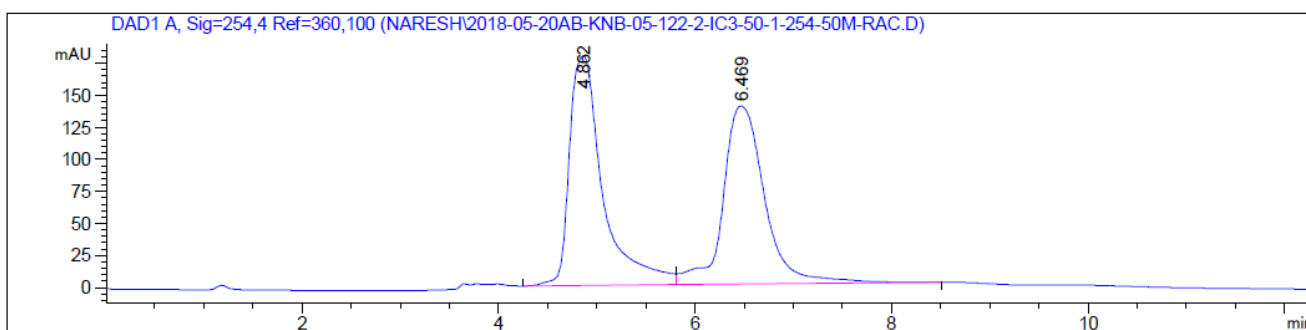

Signal 1: DAD1 A, Sig=254,4 Ref=360,100

| Peak # | RetTime [min] | Type | Width [min] | Area [mAU*s] | Height [mAU] | Area %  |
|--------|---------------|------|-------------|--------------|--------------|---------|
| 1      | 4.862         | BV   | 0.3542      | 4233.64746   | 178.82172    | 50.7486 |
| 2      | 6.469         | VB   | 0.4538      | 4108.74316   | 138.63490    | 49.2514 |

Totals : 8342.39063 317.45662

=====  
 \*\*\* End of Report \*\*\*

## HPLC data of compound (R)-4s

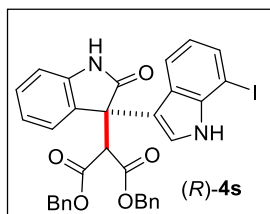

Data File C:\CHEM32\1\DATA\NARESH\2018-05-20AB-KNB-05-127-2-IC3-50-1-254-50M-CHI.D  
 Sample Name: AB-KNB-05-127-2-IC3-50-1-254-50M-CHI

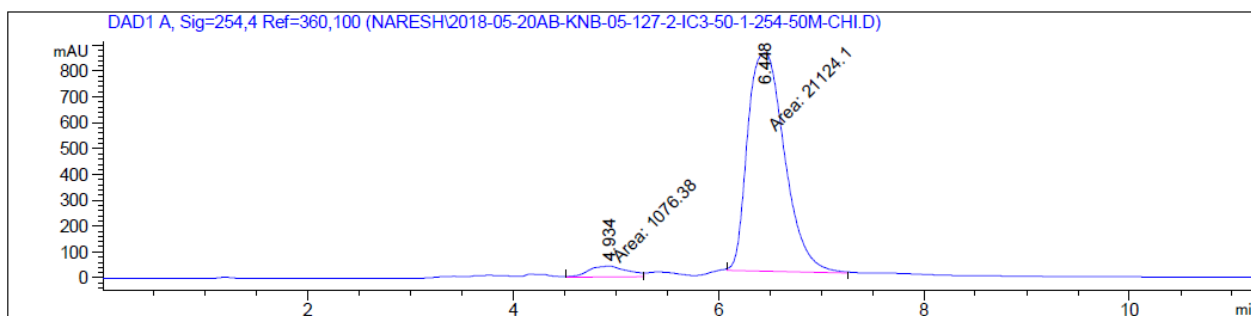

Signal 1: DAD1 A, Sig=254,4 Ref=360,100

| Peak # | RetTime [min] | Type | Width [min] | Area [mAU*s] | Height [mAU] | Area %  |
|--------|---------------|------|-------------|--------------|--------------|---------|
| 1      | 4.934         | MM   | 0.4297      | 1076.37744   | 41.74997     | 4.8484  |
| 2      | 6.448         | MM   | 0.4175      | 2.11241e4    | 843.34790    | 95.1516 |

Totals : 2.22005e4 885.09787

\*\*\* End of Report \*\*\*

**HPLC data of compound (±)-4t**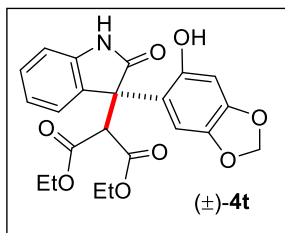

Data File C:\CHEM32\1\DATA\NARESH\AB-KNB-060-50-254-1-70M.D

Sample Name: AB-KNB-060-50-254-1-70M

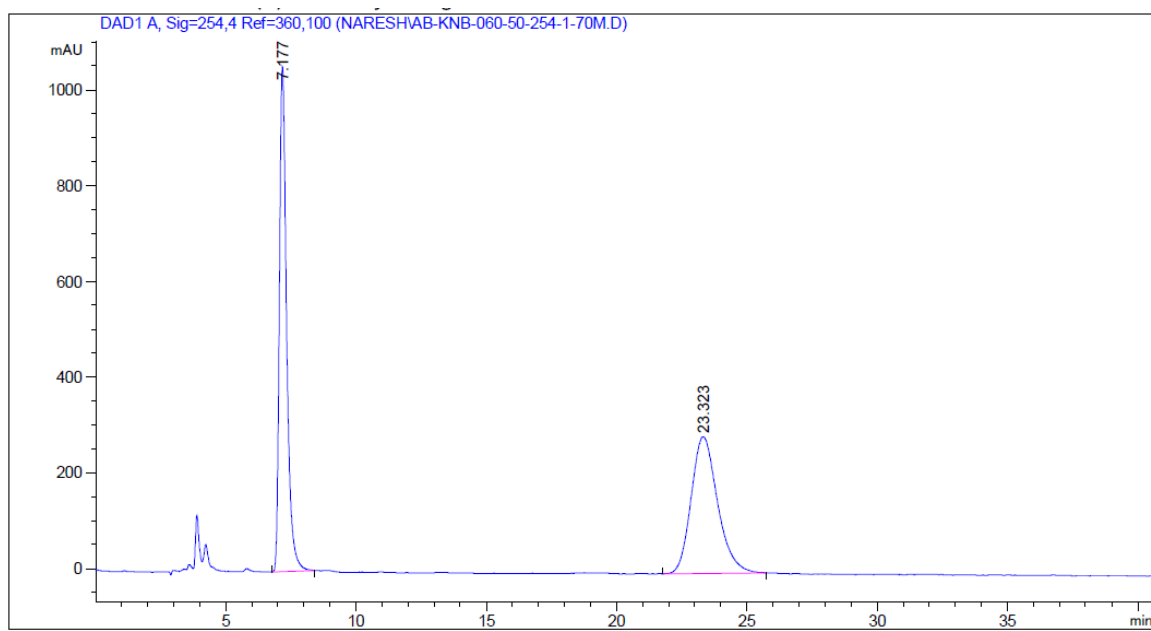

Signal 1: DAD1 A, Sig=254,4 Ref=360,100

| Peak # | RetTime [min] | Type | Width [min] | Area [mAU*s] | Height [mAU] | Area %  |
|--------|---------------|------|-------------|--------------|--------------|---------|
| 1      | 7.177         | BB   | 0.2905      | 2.03153e4    | 1055.81726   | 50.2167 |
| 2      | 23.323        | BB   | 1.0790      | 2.01400e4    | 285.49423    | 49.7833 |

Totals : 4.04553e4 1341.31149

\*\*\* End of Report \*\*\*

HPLC data of compound (*R*)-4t

Data File C:\CHEM32\1\DATA\NARESH\AB-KNB-061-50-254-1-70M.D

Sample Name: AB-KNB-061-50-254-1-70M

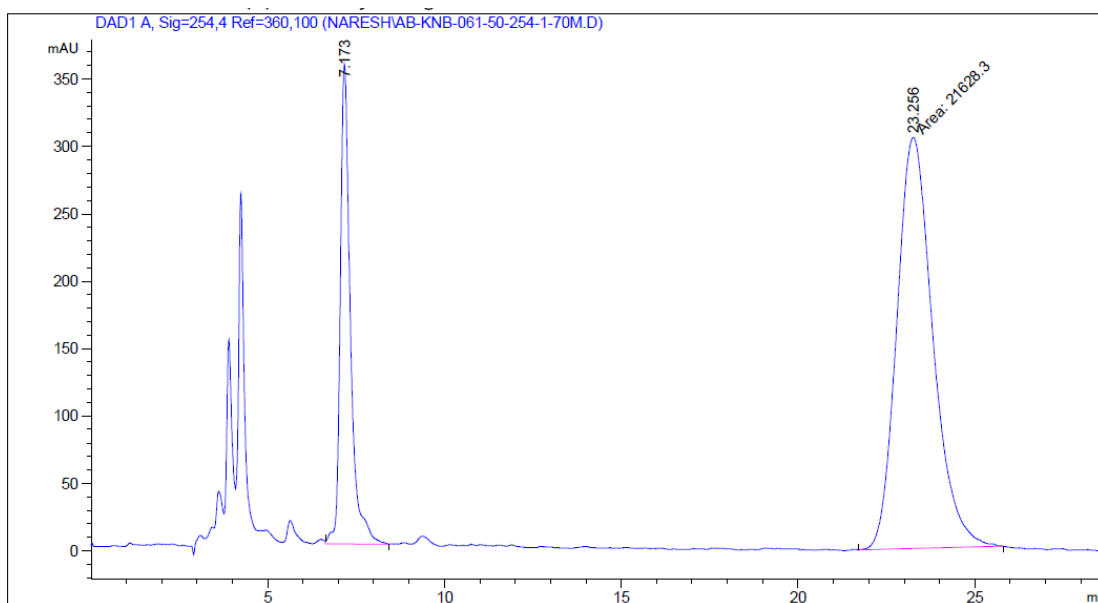

Signal 1: DAD1 A, Sig=254,4 Ref=360,100

| Peak # | RetTime [min] | Type | Width [min] | Area [mAU*s] | Height [mAU] | Area %  |
|--------|---------------|------|-------------|--------------|--------------|---------|
| 1      | 7.173         | VB   | 0.2970      | 7107.71436   | 355.94263    | 24.7345 |
| 2      | 23.256        | MM   | 1.1816      | 2.16283e4    | 305.07852    | 75.2655 |

Totals : 2.87360e4 661.02115

\*\*\* End of Report \*\*\*



HPLC data of compound ( $\pm$ )-8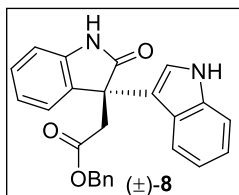

Data File C:\CHEM32\1\DATA\NARESH\AB-KNB-03-168-OD-3-50-254-1-40M.D

Sample Name: AB-KNB-03-168-OD-3-50-254-1-40M

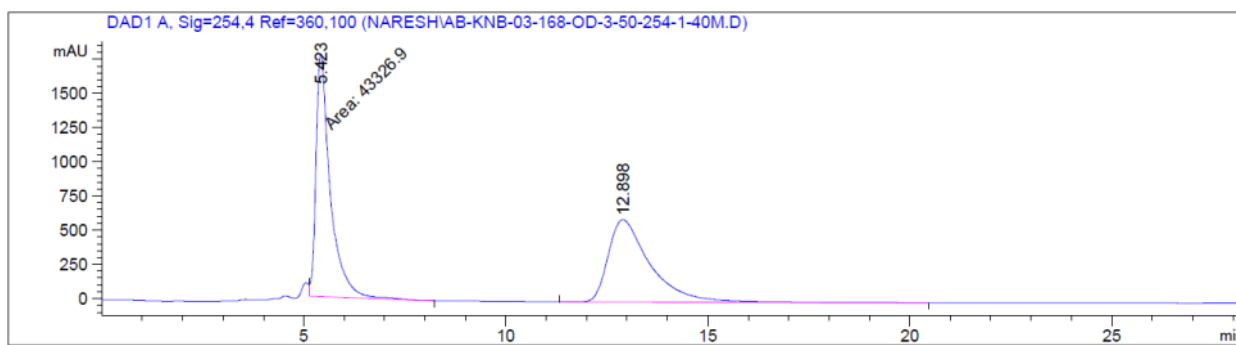

| Peak # | RetTime [min] | Type | Width [min] | Area [mAU*s] | Height [mAU] | Area %  |
|--------|---------------|------|-------------|--------------|--------------|---------|
| 1      | 5.423         | MM   | 0.4080      | 4.33269e4    | 1769.70911   | 49.9355 |
| 2      | 12.898        | BBA  | 1.0583      | 4.34388e4    | 601.63898    | 50.0645 |

Totals : 8.67657e4 2371.34808

\*\*\* End of Report \*\*\*

## HPLC data of compound (R)-8

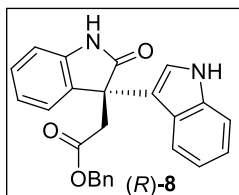

Data File C:\CHEM32\1\DATA\NARESH\AB-KNB-03-231-OD-3-3-50-254-1-50M.D

Sample Name: AB-KNB-03-231-OD-3-3-50-254-1-50M

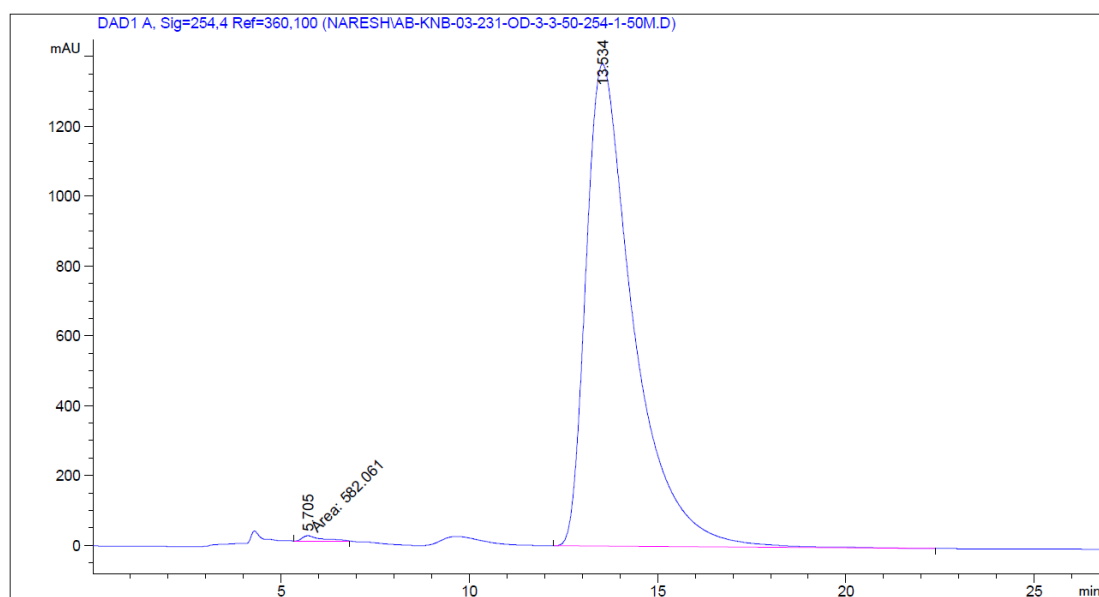

Signal 1: DAD1 A, Sig=254,4 Ref=360,100

| Peak # | RetTime [min] | Type | Width [min] | Area [mAU*s] | Height [mAU] | Area %  |
|--------|---------------|------|-------------|--------------|--------------|---------|
| 1      | 5.705         | MM   | 0.6229      | 582.06079    | 15.57285     | 0.4784  |
| 2      | 13.534        | BB   | 1.2969      | 1.21085e5    | 1381.03748   | 99.5216 |

Totals : 1.21667e5 1396.61033

\*\*\* End of Report \*\*\*

HPLC data of compound ( $\pm$ )-9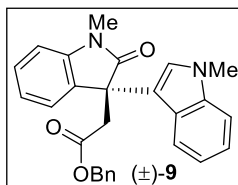

Data File C:\CHEM32\1\DATA\NARESH\AB-KNB-03-321-2-ADH-50-254-1;5-50M.D

Sample Name: AB-KNB-03-321-2-ADH-50-254-1;5-50M

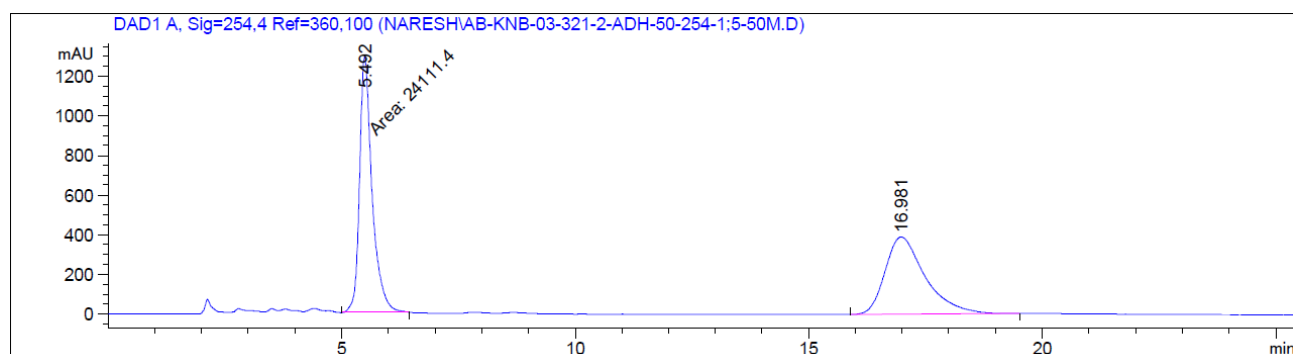

Signal 1: DAD1 A, Sig=254,4 Ref=360,100

| Peak # | RetTime [min] | Type | Width [min] | Area [mAU*s] | Height [mAU] | Area %  |
|--------|---------------|------|-------------|--------------|--------------|---------|
| 1      | 5.492         | MM   | 0.3110      | 2.41114e4    | 1292.07007   | 50.9211 |
| 2      | 16.981        | BB   | 0.8913      | 2.32392e4    | 389.91284    | 49.0789 |

Totals : 4.73506e4 1681.98291

=====

\*\*\* End of Report \*\*\*

## HPLC data of compound (R)-9

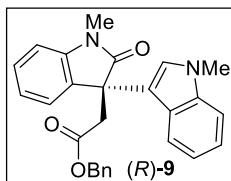

Data File C:\CHEM32\1\DATA\NARESH\AB-KNB-03-320-ADH-50-254-1;5-50M.D

Sample Name: AB-KNB-03-320-ADH-50-254-1;5-50M

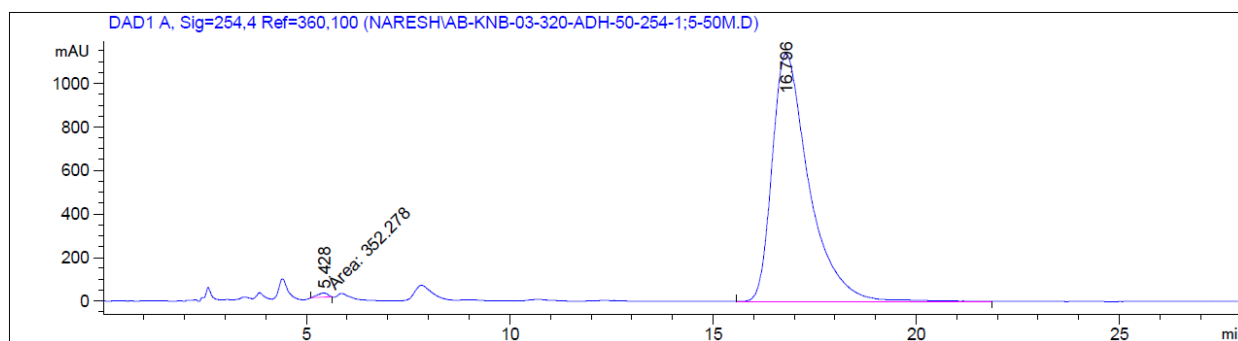

Signal 1: DAD1 A, Sig=254,4 Ref=360,100

| Peak # | RetTime [min] | Type | Width [min] | Area [mAU*s] | Height [mAU] | Area %  |
|--------|---------------|------|-------------|--------------|--------------|---------|
| 1      | 5.428         | MM   | 0.2912      | 352.27847    | 20.16364     | 0.4899  |
| 2      | 16.796        | BB   | 0.9376      | 7.15597e4    | 1138.11145   | 99.5101 |

Totals : 7.19119e4 1158.27509

=====  
 \*\*\* End of Report \*\*\*

HPLC data of compound ( $\pm$ )-12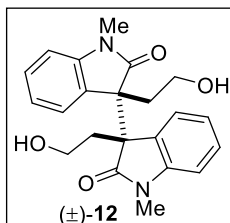

Data File C:\CHEM32\1\DATA\NARESH\AB-KNB-03-323-RACEMIC-AD-3-30-254-1-40M.D  
 Sample Name: AB-KNB-03-323-Racemic-AD-3-30-254-1-40M

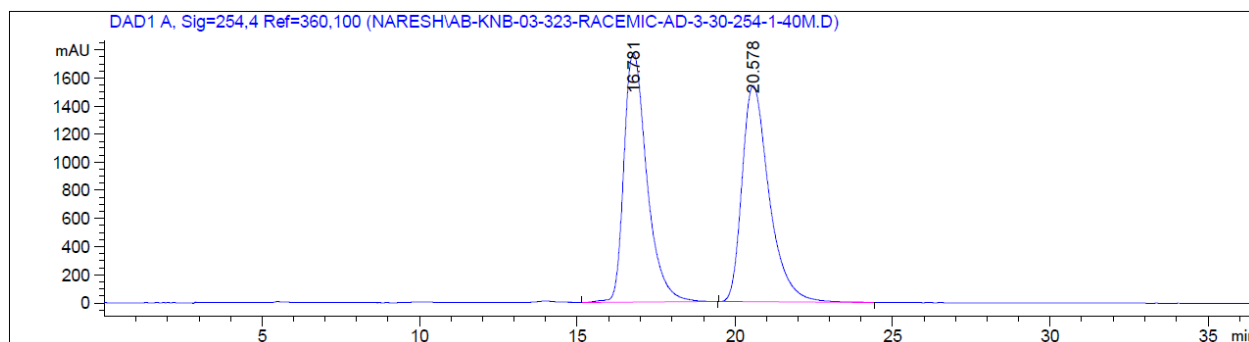

Signal 1: DAD1 A, Sig=254,4 Ref=360,100

| Peak # | RetTime [min] | Type | Width [min] | Area [mAU*s] | Height [mAU] | Area %  |
|--------|---------------|------|-------------|--------------|--------------|---------|
| 1      | 16.781        | BB   | 0.7787      | 9.02859e4    | 1771.29431   | 49.5251 |
| 2      | 20.578        | BB   | 0.9058      | 9.20173e4    | 1538.41589   | 50.4749 |

Totals : 1.82303e5 3309.71021

\*\*\* End of Report \*\*\*

HPLC data of compound (3*S*,3'*S*)-12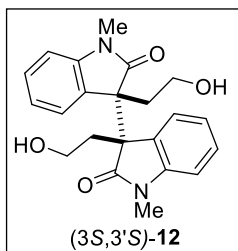

Data File C:\CHEM32\1\DATA\NARESH\AB-KNB-03-324-CHIRAL-R-AD-3-30-254-1-40M.D

Sample Name: AB-KNB-03-324-Chiral-R-AD-3-30-254-1-40M

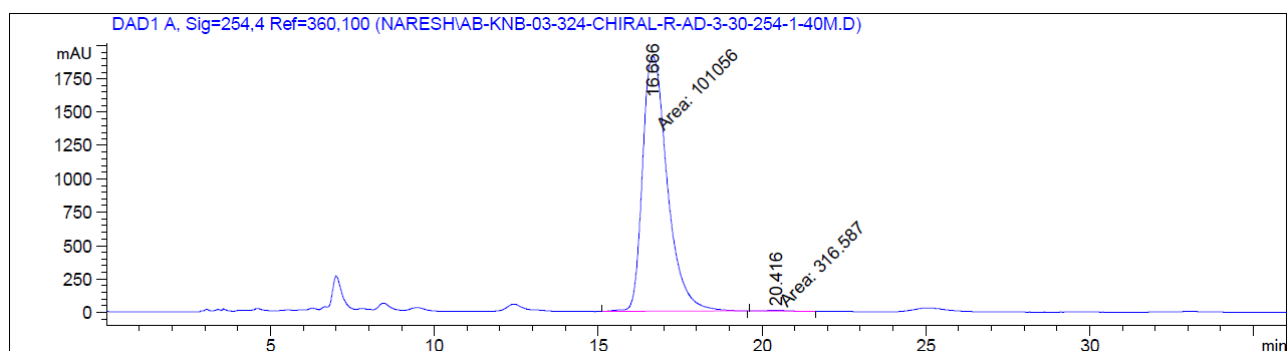

Signal 1: DAD1 A, Sig=254,4 Ref=360,100

| Peak # | RetTime [min] | Type | Width [min] | Area [mAU*s] | Height [mAU] | Area %  |
|--------|---------------|------|-------------|--------------|--------------|---------|
| 1      | 16.666        | MM   | 0.8800      | 1.01056e5    | 1913.84778   | 99.6877 |
| 2      | 20.416        | MM   | 0.7632      | 316.58658    | 6.91401      | 0.3123  |

Totals : 1.01372e5 1920.76179

\*\*\* End of Report \*\*\*

**HPLC data of compound ( $\pm$ )-17**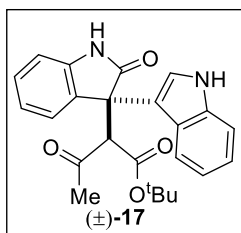

Data File C:\CHEM32\1\DATA\NARESH\2015-07-07 23-36-20AB-KNB-02-218-OZ-3-30-1-254-60.D

Sample Name: AB-KNB-02-218-OZ-3-30-1-254-60

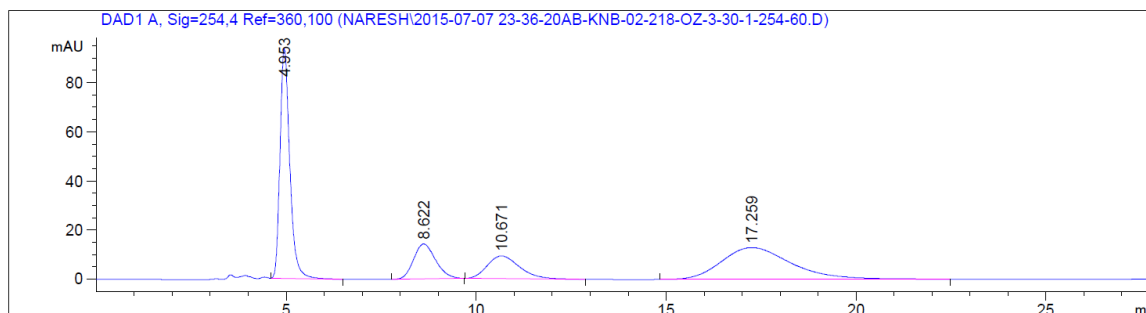

Signal 1: DAD1 A, Sig=254,4 Ref=360,100

| Peak # | RetTime [min] | Type | Width [min] | Area [mAU*s] | Height [mAU] | Area %  |
|--------|---------------|------|-------------|--------------|--------------|---------|
| 1      | 4.953         | BB   | 0.2753      | 1677.64307   | 93.50455     | 37.6730 |
| 2      | 8.622         | BB   | 0.6234      | 572.63696    | 14.23273     | 12.8591 |
| 3      | 10.671        | BB   | 0.9090      | 548.16998    | 9.28238      | 12.3097 |
| 4      | 17.259        | BB   | 1.8411      | 1654.72058   | 12.94718     | 37.1583 |

Totals : 4453.17059 129.96683

\*\*\* End of Report \*\*\*

**HPLC data of compound ( $\pm$ )-17 under optimized condition**

Data File C:\CHEM32\1\DATA\NARESH\2015-07-09 15-59-20AB-KNB-2-221-OZ-3-30-1-254-60.D  
 Sample Name: AB-KNB-2-221-OZ-3-30-1-254-60

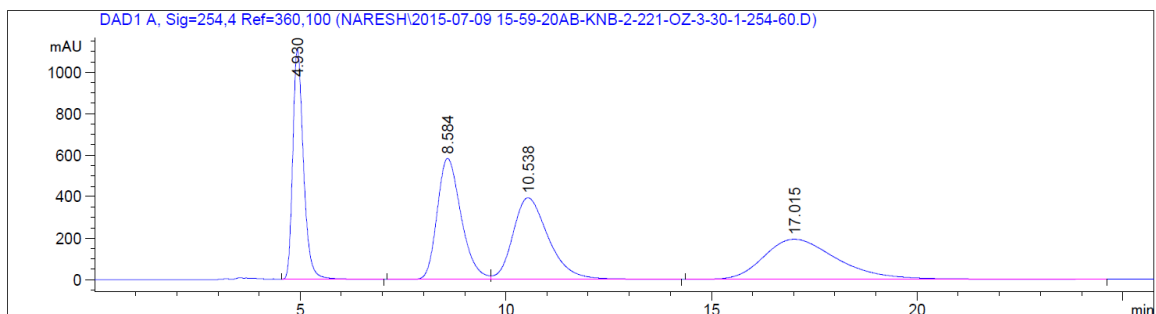

Signal 1: DAD1 A, Sig=254,4 Ref=360,100

| Peak # | RetTime [min] | Type | Width [min] | Area [mAU*s] | Height [mAU] | Area %  |
|--------|---------------|------|-------------|--------------|--------------|---------|
| 1      | 4.930         | BB   | 0.2766      | 2.00435e4    | 1110.28333   | 21.9852 |
| 2      | 8.584         | BV   | 0.6213      | 2.35663e4    | 583.36774    | 25.8492 |
| 3      | 10.538        | VB   | 0.9167      | 2.35569e4    | 393.33795    | 25.8389 |
| 4      | 17.015        | BB   | 1.8925      | 2.40015e4    | 193.31190    | 26.3266 |

Totals : 9.11682e4 2280.30092

\*\*\* End of Report \*\*\*



HPLC data of compound ( $\pm$ )-17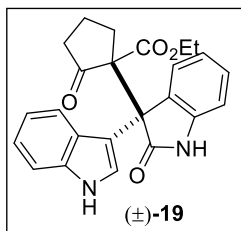

Data File C:\CHEM32\1\DATA\NARESH\2015-07-04 13-03-21AB-KNB-2-217-AS3-40-1--254-60.D  
 Sample Name: AB-KNB-2-217-AS3-40-1--254-60

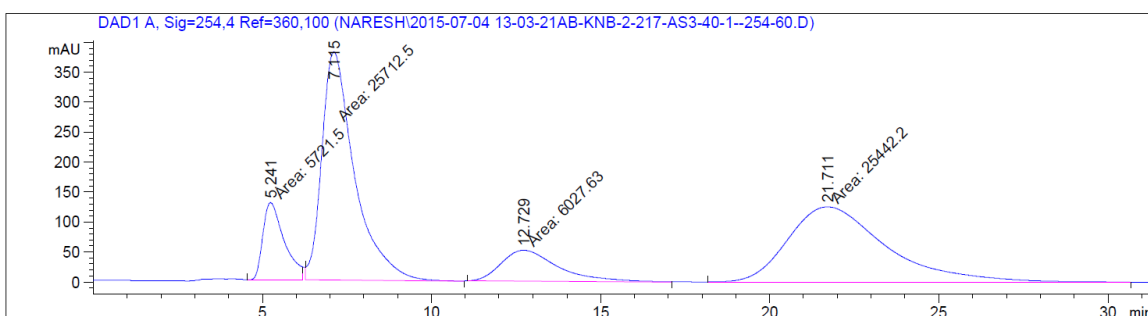

Signal 1: DAD1 A, Sig=254,4 Ref=360,100

| Peak # | RetTime [min] | Type | Width [min] | Area [mAU*s] | Height [mAU] | Area %  |
|--------|---------------|------|-------------|--------------|--------------|---------|
| 1      | 5.241         | MM   | 0.7369      | 5721.49902   | 129.40578    | 9.0956  |
| 2      | 7.115         | MM   | 1.1251      | 2.57125e4    | 380.90805    | 40.8758 |
| 3      | 12.729        | MM   | 1.9425      | 6027.63037   | 51.71767     | 9.5823  |
| 4      | 21.711        | MM   | 3.3720      | 2.54422e4    | 125.75417    | 40.4462 |

Totals : 6.29038e4 687.78567

\*\*\* End of Report \*\*\*

HPLC data of compound ( $\pm$ )-19 under optimized condition

Data File C:\CHEM32\1\DATA\NARESH\2015-07-04 13-03-21AB-KNB-2-217-AS3-40-1--254-60.D  
 Sample Name: AB-KNB-2-217-AS3-40-1--254-60

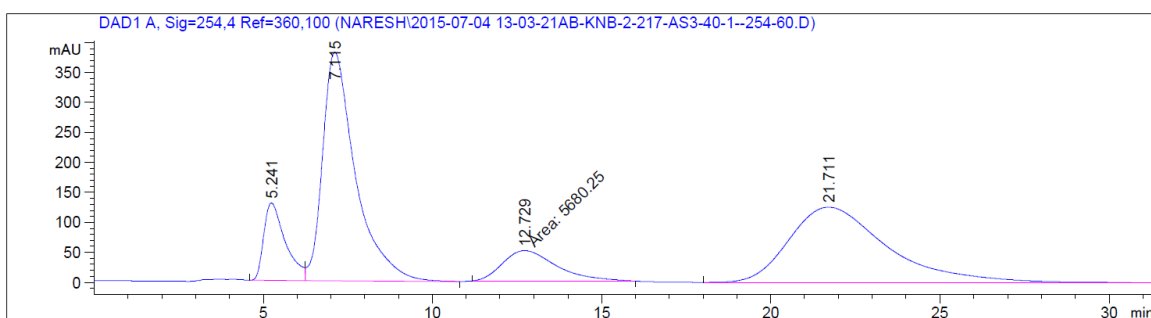

Signal 1: DAD1 A, Sig=254,4 Ref=360,100

| Peak # | RetTime [min] | Type | Width [min] | Area [mAU*s] | Height [mAU] | Area %  |
|--------|---------------|------|-------------|--------------|--------------|---------|
| 1      | 5.241         | BV   | 0.6631      | 5746.32031   | 129.13928    | 9.2159  |
| 2      | 7.115         | VB   | 1.0013      | 2.57921e4    | 381.24588    | 41.3650 |
| 3      | 12.729        | MM   | 1.8627      | 5680.24561   | 50.82446     | 9.1099  |
| 4      | 21.711        | BBA  | 2.8471      | 2.51337e4    | 125.35922    | 40.3092 |

Totals : 6.23524e4 686.56884

\*\*\* End of Report \*\*\*

**Cu-<sup>t</sup>Bu-PHOX preparation for EPR studies:**

EPR experiment was performed with <sup>t</sup>Bu-PHOX under nitrogen atmosphere. The EPR tube was evacuated and backfilled with argon and then CH<sub>2</sub>Cl<sub>2</sub> was added to the mixture. The reaction mixture was irradiated under light for 1-2 min, and then an EPR spectrum was recorded and did not show any EPR signal.

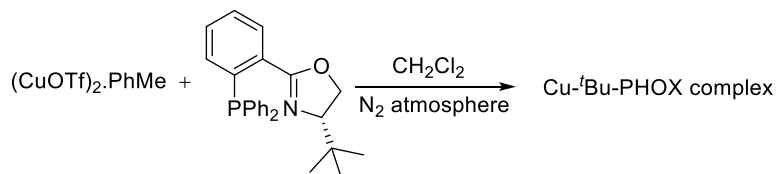

The reaction was performed using 0.007 mmol of <sup>t</sup>Bu-PHOX (**L4**) and 0.007 mmol of Cu(I)OTf·PhMe in an EPR tube under nitrogen atmosphere. The EPR tube was evacuated and backfilled with argon and then CH<sub>2</sub>Cl<sub>2</sub> was added to the mixture. The reaction mixture was irradiated under light for 1-2 min and then an EPR spectrum was recorded and observed the EPR signal with a coupling constant ( $g = 2.1120$ ) which indicates Cu(I) is converting to Cu(II) in the reaction course.

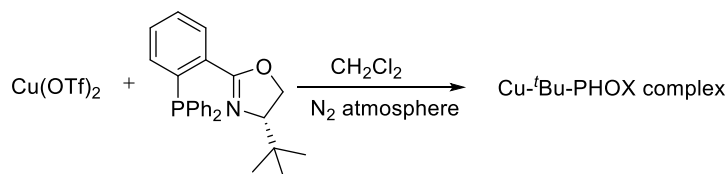

The reaction was performed using 0.034 mmol of <sup>t</sup>Bu-PHOX (**L4**) and 0.034 mmol of Cu(OTf)<sub>2</sub> in an EPR tube under nitrogen atmosphere. The EPR tube was evacuated and backfilled with argon and then CH<sub>2</sub>Cl<sub>2</sub> was added to the mixture. The reaction mixture was irradiated under light for 1-2 min and then an EPR spectrum was recorded and observed the EPR signal with a coupling constant ( $g = 2.1062$ ) which indicates the Cu(II) complex is the intermediate in the reaction course.

EPR studies of Cu-complex with <sup>t</sup>Bu-PHOX (L4)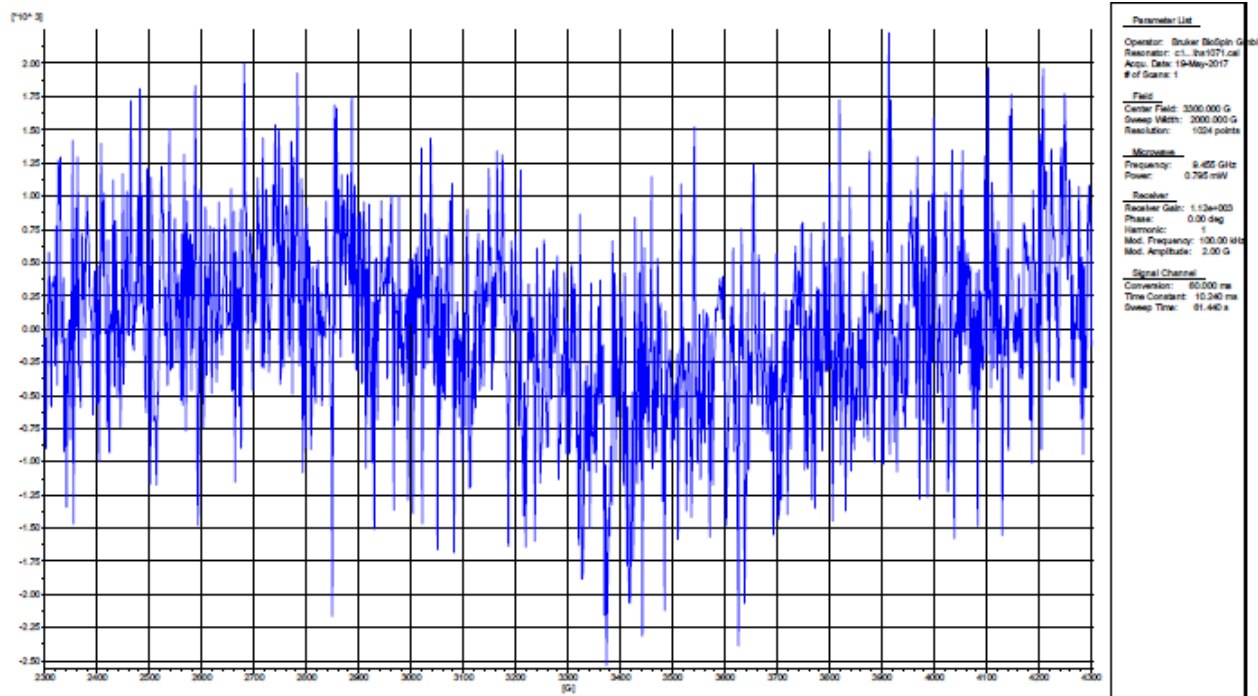

X-band EPR spectra of <sup>t</sup>Bu-PHOX (L4) at 110K under nitrogen atmosphere (solid sample).

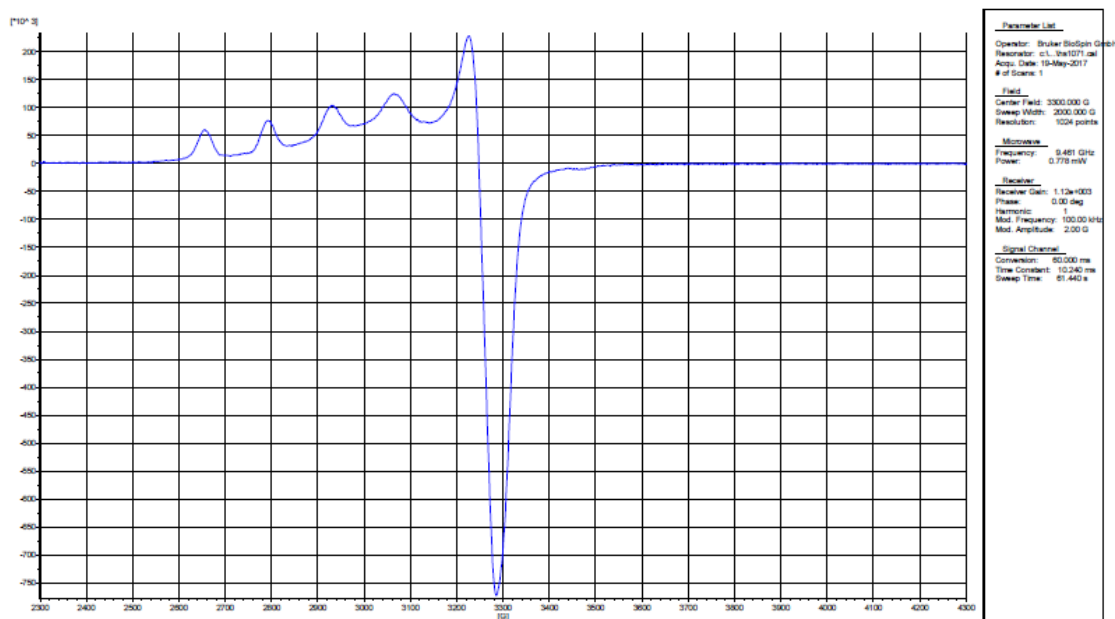

X-band EPR spectra of a complex of 1 equiv. of Cu(I)OTf.PhMe with 1 equiv. of <sup>t</sup>Bu-PHOX (L4) in dichloromethane at 110K under nitrogen atmosphere.

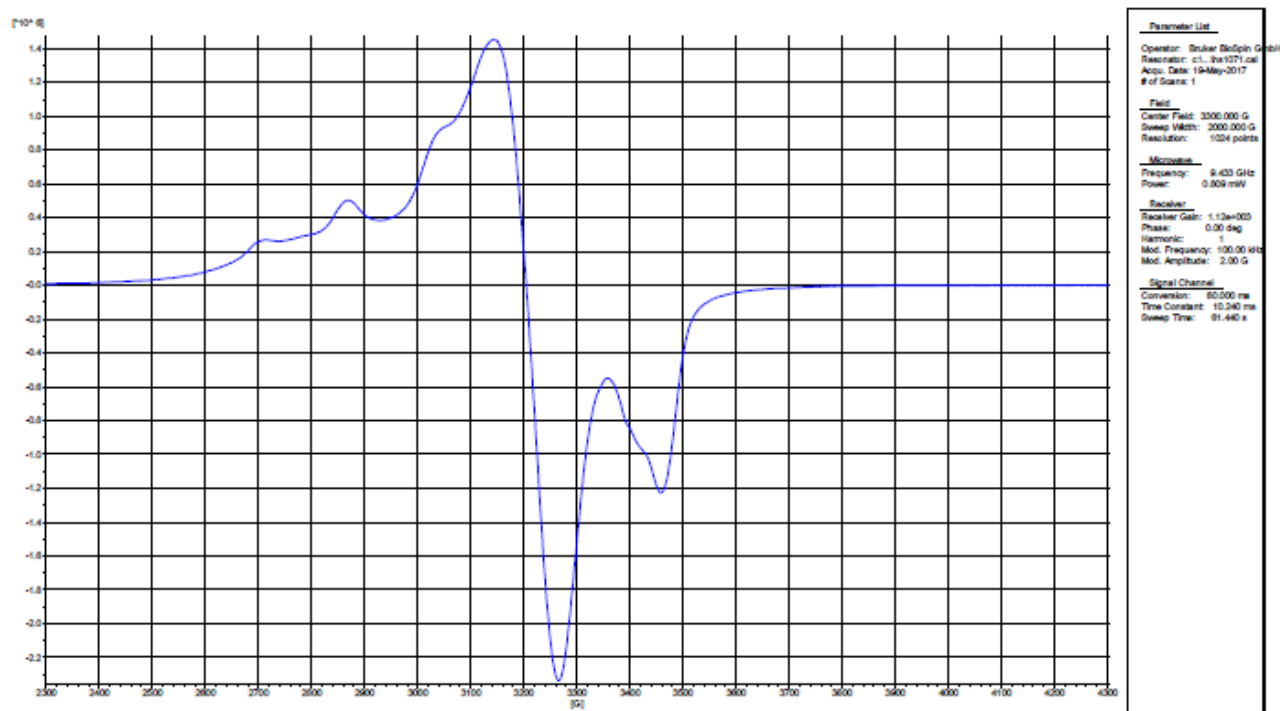

X-band EPR spectra of a complex of 1 equiv. of Cu(II)OTf with 1 equiv. of *t*Bu-PHOX (**L4**) in dichloromethane at 110K under nitrogen atmosphere.

### Cu-*t*Bu-PHOX preparation for <sup>1</sup>H-NMR and <sup>31</sup>P-NMR studies:

<sup>1</sup>H-NMR of only *t*Bu-PHOX in CDCl<sub>3</sub> shows good splitting pattern of upfield protons.

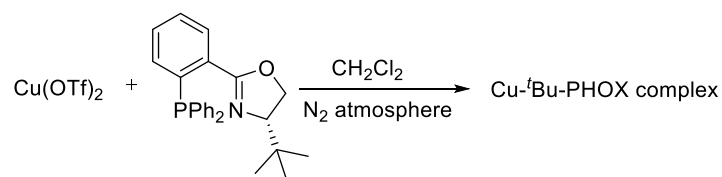

The reaction was performed using 0.034 mmol of *t*Bu-PHOX (**L4**) and 0.034 mmol of Cu(OTf)<sub>2</sub> in an NMR tube under nitrogen atmosphere in CDCl<sub>3</sub>. The NMR spectrum was recorded and observed no NMR signal of the free *t*Bu-PHOX protons in the spectrum. This indicates that Cu(II) complex (paramagnetic species) is forming.

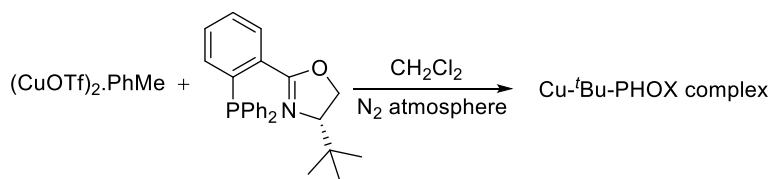

The reaction was performed using 0.034 mmol of  $^t\text{Bu-PHOX}$  (**L4**) and 0.034 mmol of  $\text{Cu(I)OTf} \cdot \text{PhMe}$  in an NMR tube under nitrogen atmosphere in  $\text{CDCl}_3$ . The NMR spectrum was recorded and observed the no NMR signal of the free  $^t\text{Bu-PHOX}$  protons in the spectrum. This indicates that  $\text{Cu(I)}$  is converting to  $\text{Cu(II)}$  (paramagnetic species) complex.

$^{31}\text{P}$ -NMR of only  $^t\text{Bu-PHOX}$  in  $\text{CDCl}_3$  shows  $^{31}\text{P}$  signal at -5.96 ppm.

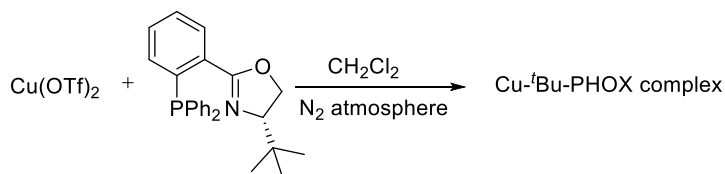

The reaction was performed using 0.034 mmol of  $^t\text{Bu-PHOX}$  (**L4**) and 0.034 mmol of  $\text{Cu(OTf)}_2$  in an NMR tube under nitrogen atmosphere in  $\text{CDCl}_3$ . The  $^{31}\text{P}$  NMR spectrum was recorded and observed no  $^{31}\text{P}$  signal of the  $^t\text{Bu-PHOX}$  in the spectrum. This indicates that phosphorus atom is bound with  $\text{Cu(II)}$  complex.

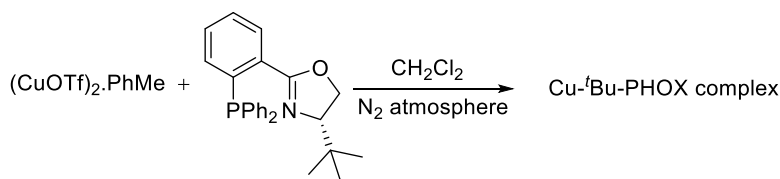

The reaction was performed using 0.034 mmol of  $^t\text{Bu-PHOX}$  (**L4**) and 0.034 mmol of  $\text{Cu(I)OTf} \cdot \text{PhMe}$  in an NMR tube under nitrogen atmosphere in  $\text{CDCl}_3$ . The  $^{31}\text{P}$  NMR spectrum was recorded and observed no  $^{31}\text{P}$ -signal of the  $^t\text{Bu-PHOX}$  in the spectrum. This indicates that phosphorus atom is bound with  $\text{Cu(II)}$  complex, which is converted from  $\text{Cu(I)OTf} \cdot \text{PhMe}$ .

**$^1\text{H}$ -NMR and  $^{31}\text{P}$ -NMR studies of Cu-complex with  $t\text{Bu}$ -PHOX (L4)**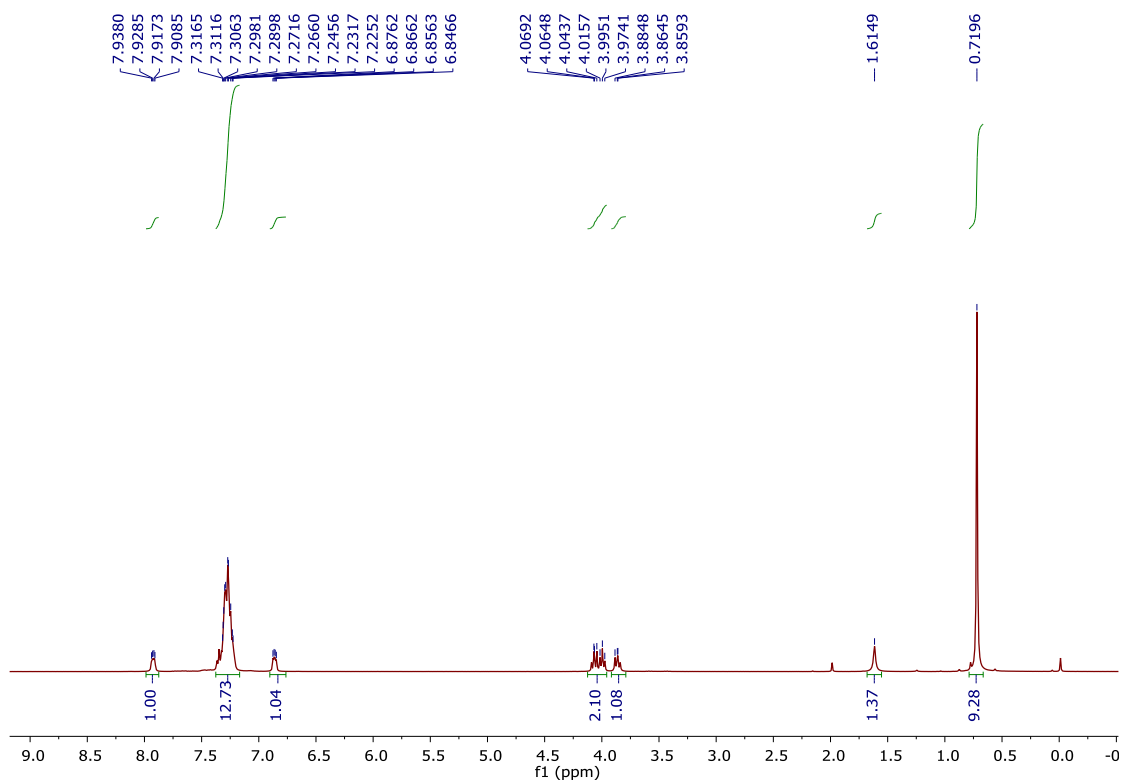 **$^1\text{H}$ -NMR of  $t\text{Bu}$ -PHOX (L4) (400 MHz,  $0.4\text{ mL CDCl}_3$ )**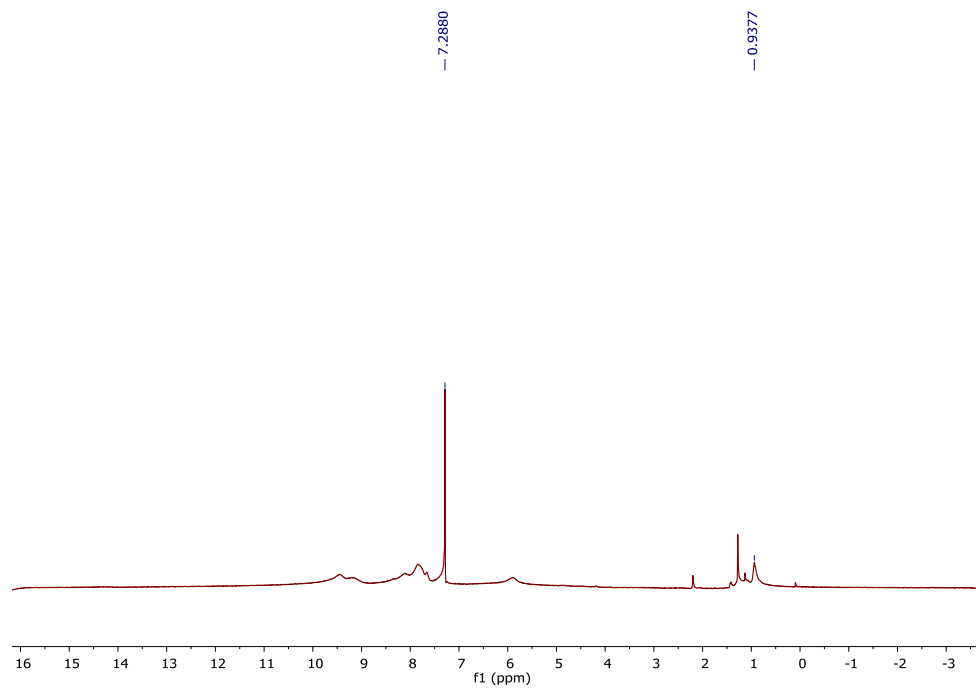

$^1\text{H}$ -NMR of  $\text{Cu}(\text{OTf})_2 + {}^t\text{Bu-PHOX}$  (**L4**) (500 MHz, 0.4 mL  $\text{CDCl}_3$ ), sample prepared under nitrogen atmosphere.

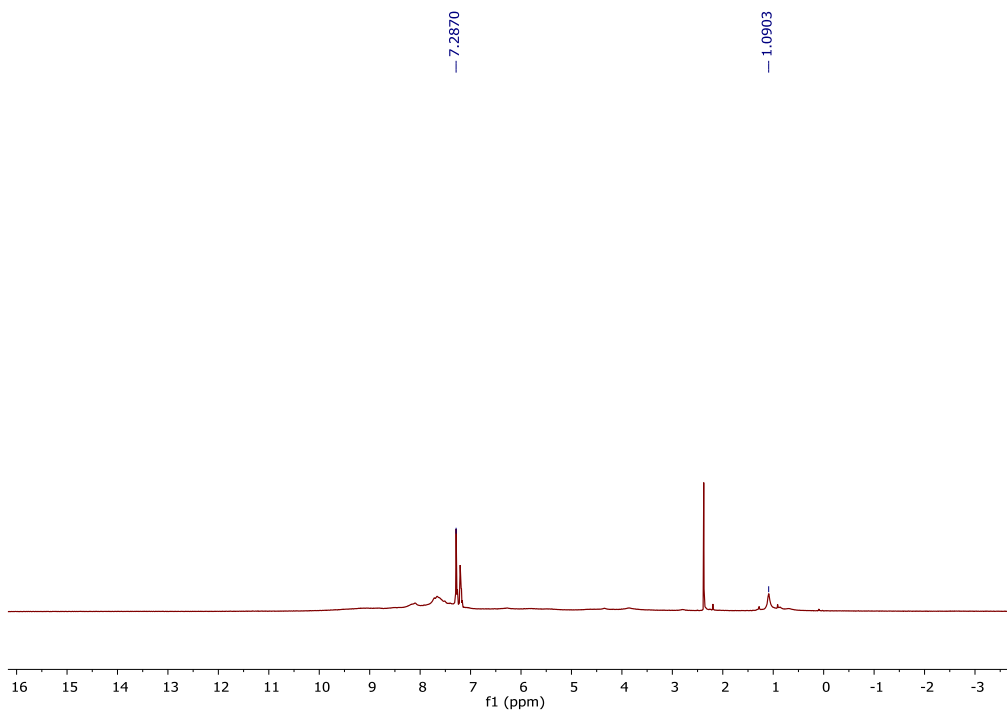

$^1\text{H}$ -NMR of  $(\text{CuOTf})_2 + {}^t\text{Bu-PHOX}$  (**L4**) (500 MHz, 0.4 mL  $\text{CDCl}_3$ ), sample prepared under nitrogen atmosphere.



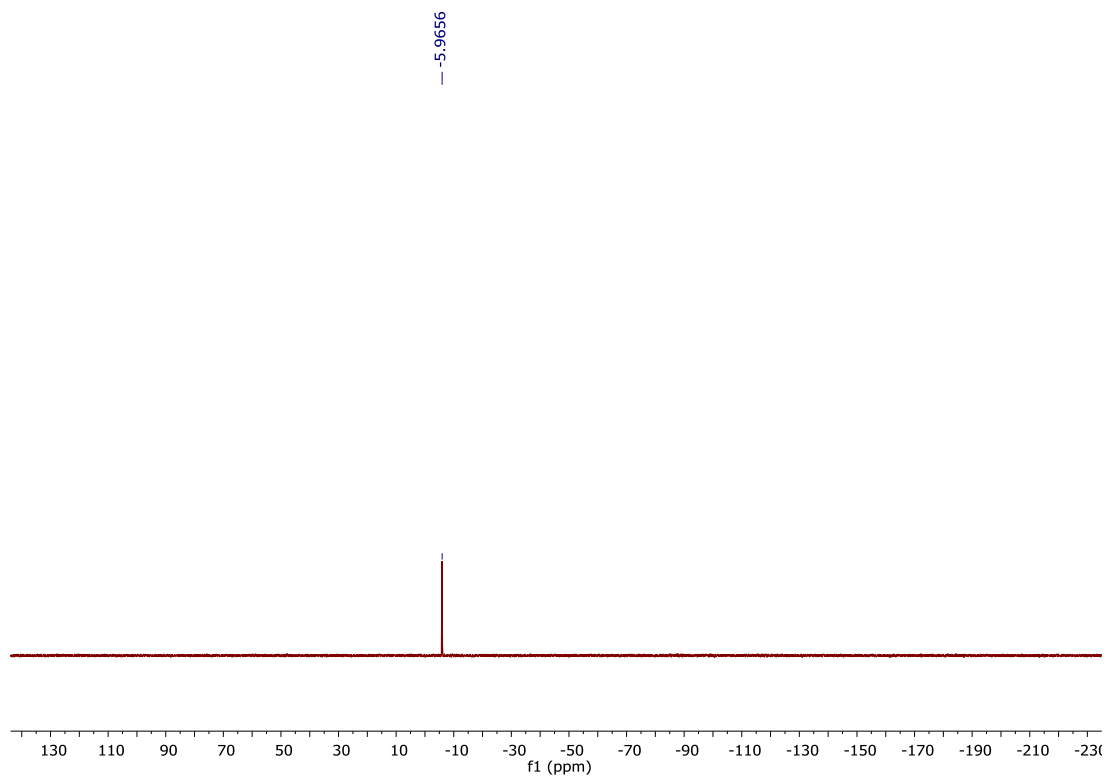

$^{31}\text{P}$ -NMR of  $t\text{Bu-PHOX}$  (**L4**) (400 MHz, 0.4 mL  $\text{CDCl}_3$ )

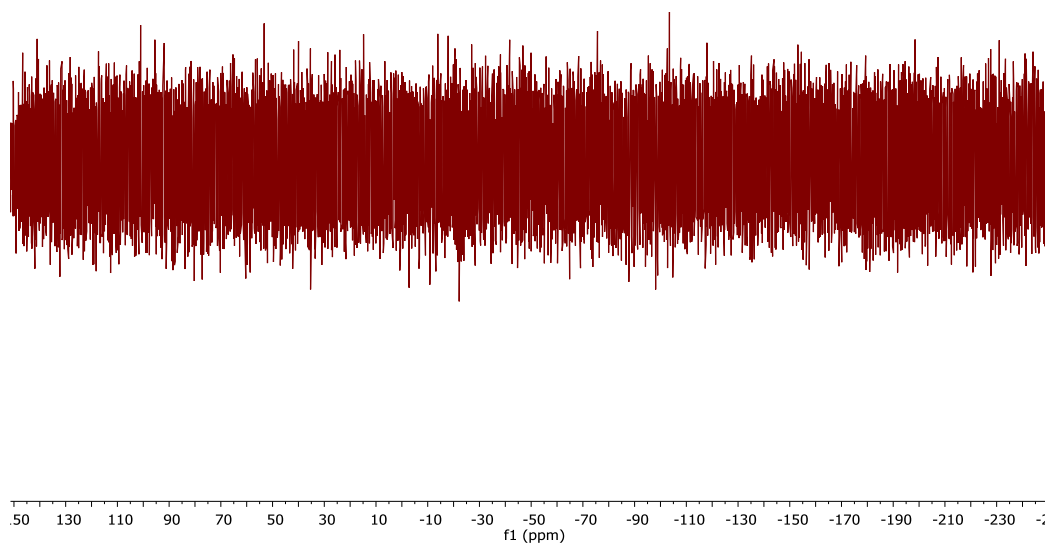

$^{31}\text{P}$ -NMR of  $\text{Cu}(\text{OTf})_2 + t\text{Bu-PHOX}$  (**L4**) (500 MHz, 0.4 mL  $\text{CDCl}_3$ ), sample prepared under nitrogen atmosphere.

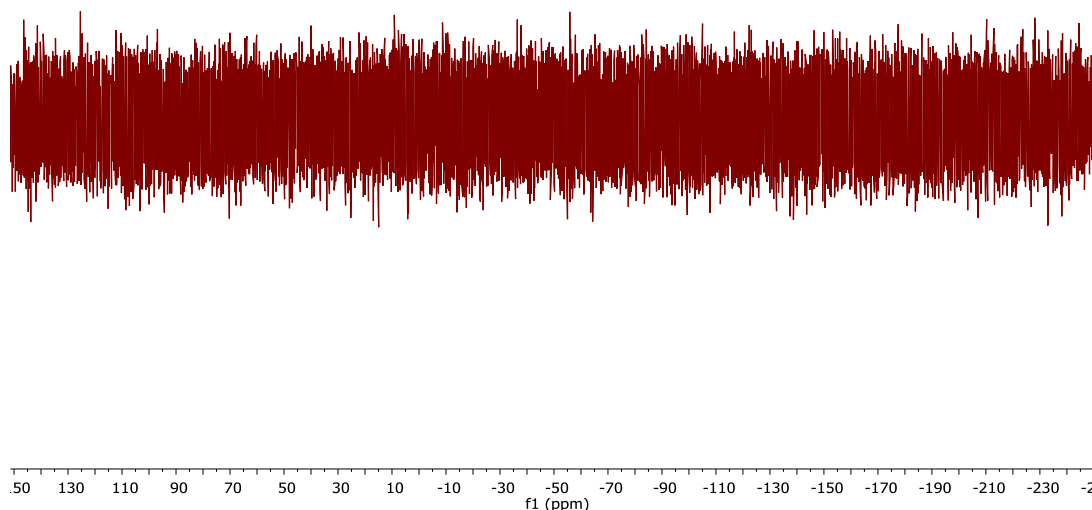

$^{31}\text{P}$ -NMR of  $(\text{CuOTf})_2 + {}^t\text{Bu-PHOX}$  (**L4**) (500 MHz, 0.4 mL  $\text{CDCl}_3$ ), sample prepared under nitrogen atmosphere.

**$\text{Cu-}^i\text{Bu-PHOX}$  (**L2**) preparation for Cyclic Voltagram studies:**

Cyclic voltammetry (CV) were carried out by three electrode configuration with a glassy carbon (GC) working electrode, a platinum counter electrode, and standard calomel electrode (SCE) as reference electrode.

**Reaction condition:**  $\text{Cu-}^i\text{Bu-PHOX}$  complex crystals (5 mg) in 5 mL  $\text{CH}_2\text{Cl}_2$  containing 1.0 M tetrabutylammonium hexafluorophosphate ( $\text{TBAPF}_6$ ).

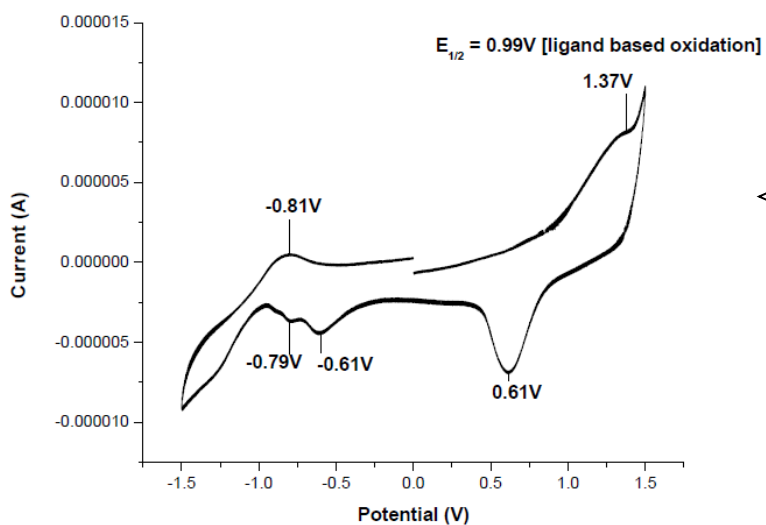

Cyclic voltammogram of the complex in  $\text{CH}_2\text{Cl}_2$ , potentials are vs SCE with Pt electrode using TBAP as supporting electrolyte.

Cyclic Voltammogram of  $\text{Cu}(\text{OTf})_2 + i\text{Bu-PHOX}$  (**L2**)

X-ray structure of  $\text{Cu}(\text{OTf})_2 + i\text{Bu-PHOX}$  complex:

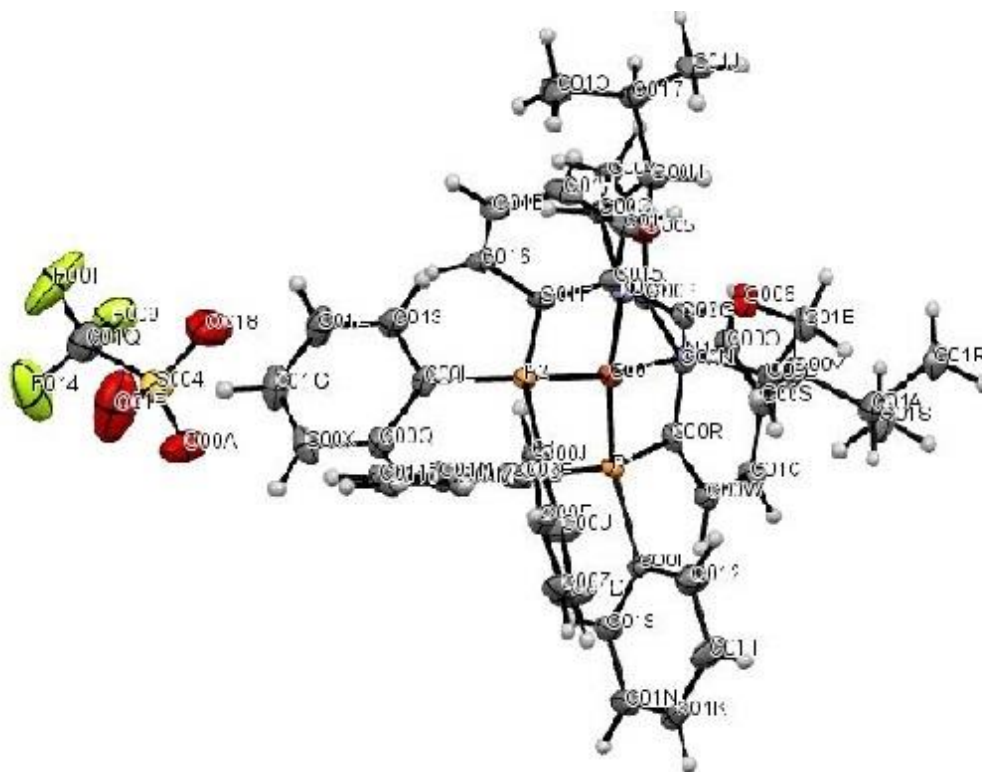

**Figure:** X-ray structure of  $\text{Cu}(\text{OTf})_2 + i\text{Bu-PHOX}$  with 50% thermal ellipsoids.

**checkCIF/PLATON report**

You have not supplied any structure factors. As a result the full set of tests cannot be run.

THIS REPORT IS FOR GUIDANCE ONLY. IF USED AS PART OF A REVIEW PROCEDURE FOR PUBLICATION, IT SHOULD NOT REPLACE THE EXPERTISE OF AN EXPERIENCED CRYSTALLOGRAPHIC REFEREE.

No syntax errors found.      CIF dictionary      Interpreting this report

**Datablock: M2\_a**

|                        |                                                    |                          |
|------------------------|----------------------------------------------------|--------------------------|
| Bond precision:        | C-C = 0.0083 Å                                     | Wavelength=0.71073       |
| Cell:                  | a=9.3999 (9)      b=22.436 (2)      c=11.7542 (11) |                          |
|                        | alpha=90      beta=107.400 (2)      gamma=90       |                          |
| Temperature:           | 130 K                                              |                          |
|                        | Calculated                                         | Reported                 |
| Volume                 | 2365.5 (4)                                         | 2365.4 (4)               |
| Space group            | P 21                                               | P 21                     |
| Hall group             | P 2yb                                              | P 2yb                    |
| Moiety formula         | C50 H52 Cu N2 O2 P2, C F3<br>O3 S                  | ?                        |
| Sum formula            | C51 H52 Cu F3 N2 O5 P2 S                           | C50 H51 Cu F5 N3 O3 P2 S |
| Mr                     | 987.50                                             | 994.47                   |
| Dx, g cm <sup>-3</sup> | 1.386                                              | 1.396                    |
| Z                      | 2                                                  | 2                        |
| Mu (mm <sup>-1</sup> ) | 0.635                                              | 0.639                    |
| F000                   | 1028.0                                             | 1032.0                   |
| F000'                  | 1029.72                                            |                          |
| h,k,lmax               | 12,29,15                                           | 12,29,15                 |
| Nref                   | 11441 [ 5865]                                      | 11406                    |
| Tmin,Tmax              | 0.912,0.944                                        |                          |
| Tmin'                  | 0.909                                              |                          |

Correction method= Not given

Data completeness= 1.94/1.00      Theta(max)= 28.000

R(reflections)= 0.0491 ( 9001)      wR2(reflections)= 0.1312 ( 11406)

S = 0.830      Npar= 590

The following ALERTS were generated. Each ALERT has the format

**test-name\_ALERT\_alert-type\_alert-level.**

Click on the hyperlinks for more details of the test.

**Alert level B**

PLAT987\_ALERT\_1\_B The Flack x is >> 0 - Do a BASF/TWIN Refinement      Please Check

**Alert level C**

PLAT041\_ALERT\_1\_C Calc. and Reported SumFormula      Strings Differ      Please Check  
 PLAT043\_ALERT\_1\_C Calculated and Reported Mol. Weight Differ by ..      6.97 Check  
 PLAT068\_ALERT\_1\_C Reported F000 Differs from Calcd (or Missing)...      Please Check  
 PLAT220\_ALERT\_2\_C Non-Solvent Resd 1      C      Ueq(max)/Ueq(min) Range      3.2 Ratio  
 PLAT244\_ALERT\_4\_C Low      'Solvent' Ueq as Compared to Neighbors of      S004 Check  
 PLAT341\_ALERT\_3\_C Low Bond Precision on      C-C Bonds .....      0.00831 Ang.

**Alert level G**

FORMU01\_ALERT\_2\_G There is a discrepancy between the atom counts in the  
     \_chemical\_formula\_sum and the formula from the \_atom\_site\* data.  
     Atom count from \_chemical\_formula\_sum: C50 H51 Cu1 F5 N3 O3 P2 S1  
     Atom count from the \_atom\_site data:    C51 H52 Cu1 F3 N2 O5 P2 S1  
 CELLZ01\_ALERT\_1\_G Difference between formula and atom\_site contents detected.  
 CELLZ01\_ALERT\_1\_G ALERT: Large difference may be due to a  
     symmetry error - see SYMMG tests  
     From the CIF: \_cell\_formula\_units\_Z      2  
     From the CIF: \_chemical\_formula\_sum    C50 H51 Cu F5 N3 O3 P2 S  
     TEST: Compare cell contents of formula and atom\_site data

| atom | Z*formula | cif sites | diff  |
|------|-----------|-----------|-------|
| C    | 100.00    | 102.00    | -2.00 |
| H    | 102.00    | 104.00    | -2.00 |
| Cu   | 2.00      | 2.00      | 0.00  |
| F    | 10.00     | 6.00      | 4.00  |
| N    | 6.00      | 4.00      | 2.00  |
| O    | 6.00      | 10.00     | -4.00 |
| P    | 4.00      | 4.00      | 0.00  |
| S    | 2.00      | 2.00      | 0.00  |

PLAT033\_ALERT\_4\_G Flack x Value Deviates > 3.0 \* sigma from Zero .      0.032 Note  
 PLAT244\_ALERT\_4\_G Low      'Solvent' Ueq as Compared to Neighbors of      C01Q Check  
 PLAT398\_ALERT\_2\_G Deviating C-O-C Angle from 120 Deg for O005      107.2 Degree  
 PLAT398\_ALERT\_2\_G Deviating C-O-C Angle from 120 Deg for O006      105.6 Degree  
 PLAT720\_ALERT\_4\_G Number of Unusual/Non-Standard Labels .....      110 Note  
 PLAT791\_ALERT\_4\_G The Model has Chirality at C00B      (Chiral SPGR)      S Verify  
 PLAT791\_ALERT\_4\_G The Model has Chirality at C00C      (Chiral SPGR)      S Verify

0 **ALERT level A** = Most likely a serious problem - resolve or explain  
 1 **ALERT level B** = A potentially serious problem, consider carefully  
 6 **ALERT level C** = Check. Ensure it is not caused by an omission or oversight  
 10 **ALERT level G** = General information/check it is not something unexpected

6 ALERT type 1 CIF construction/syntax error, inconsistent or missing data  
 4 ALERT type 2 Indicator that the structure model may be wrong or deficient  
 1 ALERT type 3 Indicator that the structure quality may be low  
 6 ALERT type 4 Improvement, methodology, query or suggestion  
 0 ALERT type 5 Informative message, check

Datablock: M2\_a - ellipsoid plot

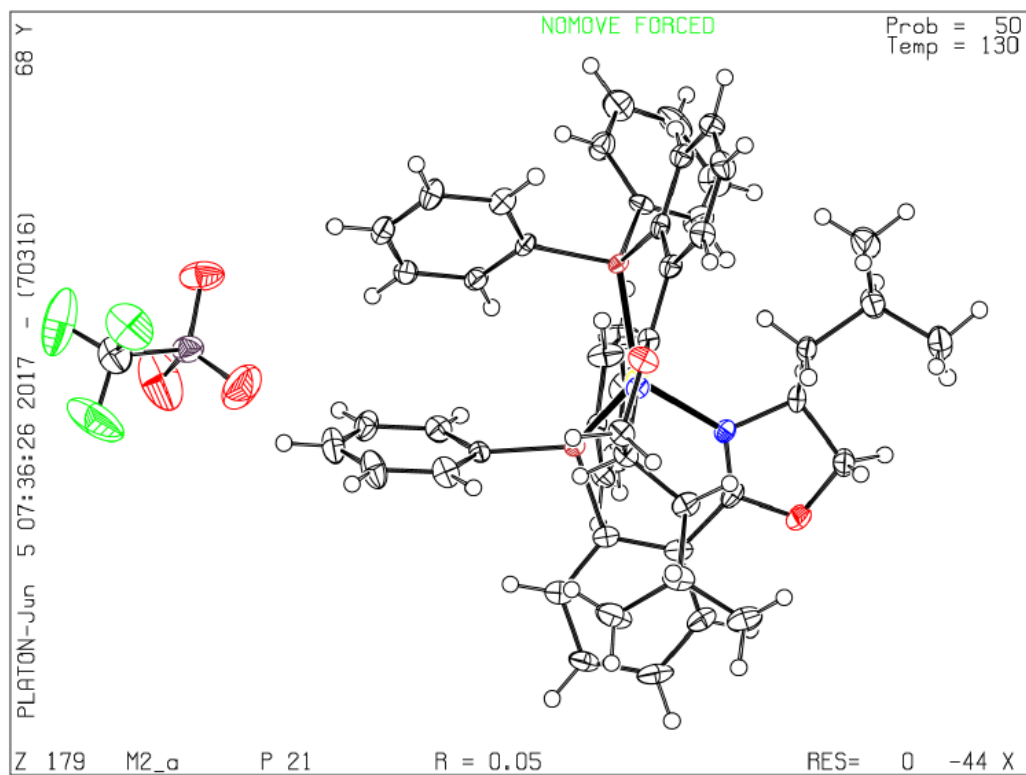

[Download CIF editor \(pubCIF\) from the IUCr](#)  
[Download CIF editor \(enCIFer\) from the CCDC](#)  
[Test a new CIF entry](#)
